# Supplementary material for: Transcriptomic analysis identifies genes and pathways related to myrmecophagy in the Malayan pangolin (Manis javanica)
Source: PeerJ. 2017 Dec 22;5:e4140. doi: 10.7717/peerj.4140 (PMC5742527; doi:10.7717/peerj.4140)
Supplement: File S2 [file peerj-05-4140-s002.xlsx]

## Sheet: Carbohydrate
#GeneID	COG_class	COG_class_annotation	GO_annotation	KEGG_annotation	KOG_class	KOG_class_annotation	Swissprot_annotation	TrEMBL_annotation	nr_annotation
gene60	[G]	Carbohydrate transport and metabolism	Molecular Function: beta-galactosidase activity (GO:0004565);; Biological Process: carbohydrate metabolic process (GO:0005975);;	--	[G]	Carbohydrate transport and metabolism	Beta-galactosidase-1-like protein (Precursor) GN=GLB1L OS=Macaca fascicularis (Crab-eating macaque) PE=2 SV=1	Uncharacterized protein {ECO:0000313|Ensembl:ENSECAP00000003944} OS=Equus caballus (Horse) PE=3 SV=1	PREDICTED: beta-galactosidase-1-like protein [Ceratotherium simum simum]
gene14316	[G]	Carbohydrate transport and metabolism	Molecular Function: 6-phosphofructokinase activity (GO:0003872);; Molecular Function: ATP binding (GO:0005524);; Cellular Component: 6-phosphofructokinase complex (GO:0005945);; Biological Process: fructose 6-phosphate metabolic process (GO:0006002);; Biological Process: glycolytic process (GO:0006096);; Molecular Function: protein C-terminus binding (GO:0008022);; Biological Process: phosphoryla…	K00850|0|ptr:451863|PFKM; phosphofructokinase, muscle; K00850 6-phosphofructokinase 1 [EC:2.7.1.11] (A)	[G]	Carbohydrate transport and metabolism	ATP-dependent 6-phosphofructokinase, muscle type {ECO:0000255|HAMAP-Rule:MF_03184} GN=PFKM OS=Canis familiaris (Dog) PE=2 SV=2	6-phosphofructokinase {ECO:0000256|PIRNR:PIRNR000533} OS=Pan troglodytes (Chimpanzee) PE=2 SV=1	PREDICTED: 6-phosphofructokinase, muscle type isoform X2 [Tupaia chinensis]
gene1262	[G]	Carbohydrate transport and metabolism	Molecular Function: purine nucleobase binding (GO:0002060);; Molecular Function: ATP binding (GO:0005524);; Cellular Component: cytoplasm (GO:0005737);; Cellular Component: plasma membrane (GO:0005886);; Biological Process: glycogen metabolic process (GO:0005977);; Molecular Function: drug binding (GO:0008144);; Molecular Function: glycogen phosphorylase activity (GO:0008184);; Molecular Function…	K00688|0|cfa:403738|PYGL; phosphorylase, glycogen, liver (EC:2.4.1.1); K00688 starch phosphorylase [EC:2.4.1.1] (A)	[G]	Carbohydrate transport and metabolism	Glycogen phosphorylase, liver form GN=PYGL OS=Bos taurus (Bovine) PE=2 SV=1	Alpha-1,4 glucan phosphorylase {ECO:0000256|RuleBase:RU000587} OS=Canis familiaris (Dog) PE=3 SV=2	glycogen phosphorylase, liver form [Canis lupus familiaris]
gene16448	[G]	Carbohydrate transport and metabolism	Molecular Function: hydrolase activity, hydrolyzing O-glycosyl compounds (GO:0004553);; Biological Process: carbohydrate metabolic process (GO:0005975);;	K01229|0|fca:101092452|LCT; lactase; K01229 lactase-phlorizin hydrolase [EC:3.2.1.108 3.2.1.62] (A)	[G]	Carbohydrate transport and metabolism	Phlorizin hydrolase (Precursor) GN=LCT OS=Oryctolagus cuniculus (Rabbit) PE=1 SV=1	Uncharacterized protein {ECO:0000313|Ensembl:ENSFCAP00000008746} OS=Felis catus (Cat) PE=3 SV=1	PREDICTED: lactase-phlorizin hydrolase [Felis catus]
gene8481	[G]	Carbohydrate transport and metabolism	Cellular Component: cytoplasm (GO:0005737);; Biological Process: carbohydrate metabolic process (GO:0005975);; Molecular Function: glycogen phosphorylase activity (GO:0008184);; Molecular Function: pyridoxal phosphate binding (GO:0030170);;	K00688|0|fca:101091099|PYGB; phosphorylase, glycogen; brain; K00688 starch phosphorylase [EC:2.4.1.1] (A)	[G]	Carbohydrate transport and metabolism	Glycogen phosphorylase, brain form GN=PYGB OS=Pongo abelii (Sumatran orangutan) PE=2 SV=3	Alpha-1,4 glucan phosphorylase {ECO:0000256|RuleBase:RU000587} OS=Felis catus (Cat) PE=3 SV=1	PREDICTED: glycogen phosphorylase, brain form [Felis catus]
gene27044	[G]	Carbohydrate transport and metabolism	Molecular Function: triose-phosphate isomerase activity (GO:0004807);; Biological Process: gluconeogenesis (GO:0006094);; Biological Process: glycolytic process (GO:0006096);; Biological Process: pentose-phosphate shunt (GO:0006098);; Biological Process: embryo development (GO:0009790);; Biological Process: glyceraldehyde-3-phosphate metabolic process (GO:0019682);;	K01803|1.93955e-179|fca:101085900|TPI1; triosephosphate isomerase 1; K01803 triosephosphate isomerase (TIM) [EC:5.3.1.1] (A)	[G]	Carbohydrate transport and metabolism	Triosephosphate isomerase GN=TPI1 OS=Pan troglodytes (Chimpanzee) PE=2 SV=2	Triosephosphate isomerase {ECO:0000256|RuleBase:RU000517} OS=Felis catus (Cat) PE=3 SV=1	PREDICTED: triosephosphate isomerase isoform X1 [Orycteropus afer afer]
gene9192	[G]	Carbohydrate transport and metabolism	Molecular Function: fructose-bisphosphate aldolase activity (GO:0004332);; Biological Process: fructose metabolic process (GO:0006000);; Biological Process: glycolytic process (GO:0006096);; Biological Process: NADH oxidation (GO:0006116);; Molecular Function: cytoskeletal protein binding (GO:0008092);; Biological Process: fructose 1,6-bisphosphate metabolic process (GO:0030388);; Biological Proc…	K01623|0|ptg:102968988|ALDOB; aldolase B, fructose-bisphosphate; K01623 fructose-bisphosphate aldolase, class I [EC:4.1.2.13] (A)	[G]	Carbohydrate transport and metabolism	Fructose-bisphosphate aldolase B GN=ALDOB OS=Oryctolagus cuniculus (Rabbit) PE=1 SV=3	Fructose-bisphosphate aldolase {ECO:0000256|RuleBase:RU003994} OS=Mustela putorius furo (European domestic ferret) PE=3 SV=1	PREDICTED: fructose-bisphosphate aldolase B [Mustela putorius furo]
gene101	[G]	Carbohydrate transport and metabolism	Molecular Function: ATP binding (GO:0005524);; Cellular Component: mitochondrion (GO:0005739);; Biological Process: nicotinamide nucleotide metabolic process (GO:0046496);; Molecular Function: ATP-dependent NAD(P)H-hydrate dehydratase activity (GO:0047453);;	K17757|7.07435e-176|ecb:100066349|CARKD; carbohydrate kinase domain containing; K17757 ATP-dependent NAD(P)H-hydrate dehydratase [EC:4.2.1.93] (A)	[G]	Carbohydrate transport and metabolism	ATP-dependent (S)-NAD(P)H-hydrate dehydratase {ECO:0000255|HAMAP-Rule:MF_03157} (Precursor) OS=Canis familiaris (Dog) PE=3 SV=1	ATP-dependent (S)-NAD(P)H-hydrate dehydratase {ECO:0000256|HAMAP-Rule:MF_03157} OS=Equus caballus (Horse) PE=3 SV=1	PREDICTED: ATP-dependent (S)-NAD(P)H-hydrate dehydratase isoform X2 [Equus przewalskii]
gene16098	[G]	Carbohydrate transport and metabolism	Molecular Function: beta-galactosidase activity (GO:0004565);; Cellular Component: lysosome (GO:0005764);; Biological Process: carbohydrate metabolic process (GO:0005975);;	K12309|4.19588e-166|aml:100474542|beta-galactosidase-like; K12309 beta-galactosidase [EC:3.2.1.23] (A)	[G]	Carbohydrate transport and metabolism	Beta-galactosidase (Precursor) GN=GLB1 OS=Canis familiaris (Dog) PE=2 SV=3	Beta-galactosidase {ECO:0000256|RuleBase:RU000675} (Fragment) OS=Mustela putorius furo (European domestic ferret) PE=2 SV=1	PREDICTED: beta-galactosidase [Ceratotherium simum simum]
gene12651	[G]	Carbohydrate transport and metabolism	Molecular Function: 4-alpha-glucanotransferase activity (GO:0004134);; Molecular Function: amylo-alpha-1,6-glucosidase activity (GO:0004135);; Cellular Component: nucleus (GO:0005634);; Cellular Component: cytoplasm (GO:0005737);; Biological Process: glycogen biosynthetic process (GO:0005978);; Biological Process: glycogen catabolic process (GO:0005980);;	K01196|0|cfa:479931|AGL; amylo-alpha-1, 6-glucosidase, 4-alpha-glucanotransferase (EC:2.4.1.25 3.2.1.33); K01196 glycogen debranching enzyme [EC:2.4.1.25 3.2.1.33] (A)	[G]	Carbohydrate transport and metabolism	Amylo-alpha-1,6-glucosidase GN=AGL OS=Canis familiaris (Dog) PE=2 SV=1	Glycogen debranching enzyme {ECO:0000313|EMBL:CCP73300.1} OS=Neovison vison (American mink) PE=2 SV=1	PREDICTED: glycogen debranching enzyme isoform X1 [Mustela putorius furo]
gene20937	[G]	Carbohydrate transport and metabolism	Molecular Function: ribose-5-phosphate isomerase activity (GO:0004751);; Biological Process: pentose-phosphate shunt, non-oxidative branch (GO:0009052);;	K01807|0|cfa:100856455|RPIA; ribose 5-phosphate isomerase A; K01807 ribose 5-phosphate isomerase A [EC:5.3.1.6] (A)	[G]	Carbohydrate transport and metabolism	Ribose-5-phosphate isomerase OS=Sus scrofa (Pig) PE=2 SV=1	Uncharacterized protein {ECO:0000313|Ensembl:ENSMPUP00000009277} OS=Mustela putorius furo (European domestic ferret) PE=3 SV=1	PREDICTED: ribose-5-phosphate isomerase [Odobenus rosmarus divergens]
gene1587	[G]	Carbohydrate transport and metabolism	Molecular Function: galactokinase activity (GO:0004335);; Molecular Function: ATP binding (GO:0005524);; Molecular Function: galactose binding (GO:0005534);; Cellular Component: cytoplasm (GO:0005737);; Biological Process: galactose metabolic process (GO:0006012);; Cellular Component: membrane (GO:0016020);; Biological Process: galactitol metabolic process (GO:0019402);; Biological Process: carbo…	K00849|0|cfa:403694|GALK1; galactokinase 1 (EC:2.7.1.6); K00849 galactokinase [EC:2.7.1.6] (A)	[G]	Carbohydrate transport and metabolism	Galactokinase GN=GALK1 OS=Canis familiaris (Dog) PE=2 SV=1	Uncharacterized protein {ECO:0000313|Ensembl:ENSMPUP00000013716} OS=Mustela putorius furo (European domestic ferret) PE=3 SV=1	PREDICTED: galactokinase [Mustela putorius furo]
gene7353	[G]	Carbohydrate transport and metabolism	Cellular Component: cytoplasm (GO:0005737);; Molecular Function: zinc ion binding (GO:0008270);; Biological Process: L-methionine biosynthetic process from S-adenosylmethionine (GO:0019284);; Biological Process: L-methionine biosynthetic process from methylthioadenosine (GO:0019509);; Molecular Function: identical protein binding (GO:0042802);; Biological Process: negative regulation of apoptotic…	K08964|3.43385e-169|aml:100476220|probable methylthioribulose-1-phosphate dehydratase-like; K08964 methylthioribulose-1-phosphate dehydratase [EC:4.2.1.109] (A)	[G]	Carbohydrate transport and metabolism	Methylthioribulose-1-phosphate dehydratase {ECO:0000255|HAMAP-Rule:MF_03116} OS=Bos taurus (Bovine) PE=2 SV=1	Methylthioribulose-1-phosphate dehydratase {ECO:0000256|HAMAP-Rule:MF_03116} OS=Ailuropoda melanoleuca (Giant panda) PE=3 SV=1	PREDICTED: methylthioribulose-1-phosphate dehydratase [Ailuropoda melanoleuca]
gene14635	[G]	Carbohydrate transport and metabolism	Molecular Function: 6-phosphofructo-2-kinase activity (GO:0003873);; Molecular Function: fructose-2,6-bisphosphate 2-phosphatase activity (GO:0004331);; Molecular Function: ATP binding (GO:0005524);; Biological Process: fructose metabolic process (GO:0006000);; Biological Process: fructose 2,6-bisphosphate metabolic process (GO:0006003);;	K01103|0|lve:103089397|PFKFB3; 6-phosphofructo-2-kinase/fructose-2,6-biphosphatase 3; K01103 6-phosphofructo-2-kinase / fructose-2,6-biphosphatase 3&#160; [EC:2.7.1.105 3.1.3.46] (A)	[G]	Carbohydrate transport and metabolism	Fructose-2,6-bisphosphatase GN=PFKFB3 OS=Pongo abelii (Sumatran orangutan) PE=2 SV=2	Uncharacterized protein {ECO:0000313|Ensembl:ENSMMUP00000013892} OS=Macaca mulatta (Rhesus macaque) PE=4 SV=1	PREDICTED: 6-phosphofructo-2-kinase/fructose-2,6-bisphosphatase 3 isoform 1 [Orcinus orca]
gene3911	[G]	Carbohydrate transport and metabolism	Cellular Component: cytoplasm (GO:0005737);; Cellular Component: cell-cell junction (GO:0005911);; Biological Process: sensory perception of sound (GO:0007605);; Cellular Component: external side of plasma membrane (GO:0009897);; Molecular Function: water channel activity (GO:0015250);; Cellular Component: integral component of membrane (GO:0016021);; Cellular Component: basolateral plasma membra…	K09866|0|ecb:100051905|AQP4; aquaporin 4; K09866 aquaporin-4 (A)	[G]	Carbohydrate transport and metabolism	Aquaporin-4 GN=AQP4 OS=Bos taurus (Bovine) PE=2 SV=3	Uncharacterized protein {ECO:0000313|Ensembl:ENSECAP00000003378} OS=Equus caballus (Horse) PE=3 SV=1	PREDICTED: aquaporin-4 isoform X1 [Equus caballus]
gene26822	[G]	Carbohydrate transport and metabolism	--	K01578|1.06535e-145|cfr:102519722|MLYCD; malonyl-CoA decarboxylase; K01578 malonyl-CoA decarboxylase [EC:4.1.1.9] (A)	[G]	Carbohydrate transport and metabolism	--	Putative malonyl-coa decarboxylase {ECO:0000313|EMBL:JAA51790.1} (Fragment) OS=Desmodus rotundus (Vampire bat) PE=2 SV=1	PREDICTED: malonyl-CoA decarboxylase, mitochondrial [Ceratotherium simum simum]
gene3699	[G]	Carbohydrate transport and metabolism	Molecular Function: fructose-2,6-bisphosphate 2-phosphatase activity (GO:0004331);; Cellular Component: intracellular (GO:0005622);; Biological Process: positive regulation of cardiac muscle cell apoptotic process (GO:0010666);; Biological Process: negative regulation of macromitophagy (GO:1901525);; Biological Process: negative regulation of reactive oxygen species metabolic process (GO:2000378)…	K14634|6.21121e-149|aml:100471272|probable fructose-2,6-bisphosphatase TIGAR-like; K14634 fructose-2,6-bisphosphatase [EC:3.1.3.46] (A)	[G]	Carbohydrate transport and metabolism	Fructose-2,6-bisphosphatase TIGAR GN=TIGAR OS=Bos taurus (Bovine) PE=2 SV=1	Uncharacterized protein {ECO:0000313|EMBL:AES10551.1} (Fragment) OS=Mustela putorius furo (European domestic ferret) PE=2 SV=1	PREDICTED: fructose-2,6-bisphosphatase TIGAR [Odobenus rosmarus divergens]
gene1103	[G]	Carbohydrate transport and metabolism	Cellular Component: cytoplasm (GO:0005737);; Molecular Function: inositol monophosphate 1-phosphatase activity (GO:0008934);; Molecular Function: protein homodimerization activity (GO:0042803);; Biological Process: phosphatidylinositol phosphorylation (GO:0046854);; Biological Process: inositol phosphate dephosphorylation (GO:0046855);;	K01092|1.80527e-174|cfa:608801|IMPA2; inositol(myo)-1(or 4)-monophosphatase 2; K01092 myo-inositol-1(or 4)-monophosphatase [EC:3.1.3.25] (A)	[G]	Carbohydrate transport and metabolism	Inositol monophosphatase 1 GN=IMPA1 OS=Bos taurus (Bovine) PE=1 SV=1	Putative inositol monophosphatase {ECO:0000313|EMBL:JAA51226.1} (Fragment) OS=Desmodus rotundus (Vampire bat) PE=2 SV=1	PREDICTED: inositol monophosphatase 2 [Condylura cristata]
gene5614	[G]	Carbohydrate transport and metabolism	Molecular Function: beta-mannosidase activity (GO:0004567);; Biological Process: carbohydrate metabolic process (GO:0005975);; Biological Process: glycoprotein catabolic process (GO:0006516);;	K01192|4.69389e-124|ggo:101148654|MANBA; beta-mannosidase isoform 1; K01192 beta-mannosidase [EC:3.2.1.25] (A)	[G]	Carbohydrate transport and metabolism	Beta-mannosidase (Precursor) GN=MANBA OS=Capra hircus (Goat) PE=2 SV=1	Putative uncharacterized protein DKFZp468F089 {ECO:0000313|EMBL:CAH91050.1} OS=Pongo abelii (Sumatran orangutan) PE=2 SV=1	PREDICTED: beta-mannosidase-like [Equus przewalskii]
gene15604	[G]	Carbohydrate transport and metabolism	Molecular Function: ATP binding (GO:0005524);; Cellular Component: mitochondrion (GO:0005739);; Cellular Component: Golgi apparatus (GO:0005794);; Biological Process: protein phosphorylation (GO:0006468);; Molecular Function: glycerate kinase activity (GO:0008887);;	K15788|0|bacu:103011424|GLYCTK; glycerate kinase; K15788 glycerate kinase [EC:2.7.1.31] (A)	[G]	Carbohydrate transport and metabolism	Glycerate kinase GN=GLYCTK OS=Bos taurus (Bovine) PE=2 SV=1	Dynein heavy chain 1, axonemal {ECO:0000313|EMBL:EPY84637.1} OS=Camelus ferus (Wild Bactrian camel) PE=4 SV=1	PREDICTED: glycerate kinase isoform X1 [Balaenoptera acutorostrata scammoni]
gene7343	[G]	Carbohydrate transport and metabolism	Cellular Component: phosphopyruvate hydratase complex (GO:0000015);; Molecular Function: magnesium ion binding (GO:0000287);; Molecular Function: phosphopyruvate hydratase activity (GO:0004634);; Biological Process: glycolytic process (GO:0006096);;	K01689|0|pale:102890922|ENO3; enolase 3 (beta, muscle); K01689 enolase [EC:4.2.1.11] (A)	[G]	Carbohydrate transport and metabolism	Beta-enolase GN=ENO3 OS=Bos taurus (Bovine) PE=2 SV=1	Uncharacterized protein {ECO:0000313|Ensembl:ENSPPYP00000008840} OS=Pongo abelii (Sumatran orangutan) PE=3 SV=2	PREDICTED: beta-enolase isoformX1 [Canis lupus familiaris]
gene18745	[G]	Carbohydrate transport and metabolism	Molecular Function: magnesium ion binding (GO:0000287);; Molecular Function: phosphoglucomutase activity (GO:0004614);; Biological Process: glucose metabolic process (GO:0006006);; Molecular Function: phosphopentomutase activity (GO:0008973);;	K15779|0|cfa:479116|PGM2; phosphoglucomutase 2; K15779 phosphoglucomutase / phosphopentomutase [EC:5.4.2.2 5.4.2.7] (A)	[G]	Carbohydrate transport and metabolism	Phosphoglucomutase-2 GN=PGM2 OS=Pongo abelii (Sumatran orangutan) PE=2 SV=3	Uncharacterized protein {ECO:0000313|Ensembl:ENSCAFP00000023951} OS=Canis familiaris (Dog) PE=4 SV=1	PREDICTED: phosphoglucomutase-2 [Canis lupus familiaris]
gene5595	[G]	Carbohydrate transport and metabolism	Cellular Component: cytosol (GO:0005829);; Biological Process: fructose 6-phosphate metabolic process (GO:0006002);; Biological Process: regulation of gluconeogenesis (GO:0006111);; Molecular Function: AMP binding (GO:0016208);; Biological Process: dephosphorylation (GO:0016311);; Biological Process: negative regulation of cell growth (GO:0030308);; Biological Process: cellular response to drug (…	K03841|0|ssc:397038|FBP1, FBP; fructose-1,6-bisphosphatase 1 (EC:3.1.3.11); K03841 fructose-1,6-bisphosphatase I [EC:3.1.3.11] (A)	[G]	Carbohydrate transport and metabolism	Fructose-1,6-bisphosphatase 1 GN=FBP1 OS=Sus scrofa (Pig) PE=1 SV=4	Uncharacterized protein {ECO:0000313|Ensembl:ENSCAFP00000001869} OS=Canis familiaris (Dog) PE=3 SV=1	PREDICTED: fructose-1,6-bisphosphatase 1 [Ceratotherium simum simum]
gene12522	[G]	Carbohydrate transport and metabolism	Molecular Function: transporter activity (GO:0005215);; Biological Process: carbohydrate transport (GO:0008643);; Cellular Component: integral component of membrane (GO:0016021);; Biological Process: transmembrane transport (GO:0055085);;	K13783|0|bacu:103018128|SLC37A2; solute carrier family 37 (glucose-6-phosphate transporter), member 2; K13783 MFS transporter, OPA family, solute carrier family 37 (glycerol-3-phosphate transporter), member 1/2 (A)	[G]	Carbohydrate transport and metabolism	Sugar phosphate exchanger 2 GN=SLC37A2 OS=Bos taurus (Bovine) PE=2 SV=1	Uncharacterized protein {ECO:0000313|Ensembl:ENSOGAP00000013976} OS=Otolemur garnettii (Small-eared galago) PE=4 SV=1	PREDICTED: sugar phosphate exchanger 2 isoform X2 [Equus caballus]
gene3915	[G]	Carbohydrate transport and metabolism	Molecular Function: 1,4-alpha-glucan branching enzyme activity (GO:0003844);; Molecular Function: hydrolase activity, hydrolyzing O-glycosyl compounds (GO:0004553);; Biological Process: glycogen biosynthetic process (GO:0005978);; Molecular Function: cation binding (GO:0043169);;	K00700|9.61299e-108|tup:102477668|1,4-alpha-glucan-branching enzyme-like; K00700 1,4-alpha-glucan branching enzyme [EC:2.4.1.18] (A)	[G]	Carbohydrate transport and metabolism	1,4-alpha-glucan-branching enzyme GN=GBE1 OS=Felis catus (Cat) PE=2 SV=1	Macaca fascicularis brain cDNA clone: QtrA-15303, similar to human glucan (1,4-alpha-), branching enzyme 1 (glycogenbranching enzyme, Andersen disease, glycogen storagedisease type IV) (GBE1), mRNA, Ref... {ECO:0000313|EMBL:BAE91249.1} OS=Macaca fascicularis (Crab-eating macaque) PE=2 SV=1	PREDICTED: 1,4-alpha-glucan-branching enzyme-like [Odobenus rosmarus divergens]
gene26177	[G]	Carbohydrate transport and metabolism	Molecular Function: beta-galactosidase activity (GO:0004565);; Biological Process: carbohydrate metabolic process (GO:0005975);;	--	[G]	Carbohydrate transport and metabolism	Beta-galactosidase (Precursor) GN=GLB1 OS=Bos taurus (Bovine) PE=2 SV=1	Beta-galactosidase {ECO:0000256|RuleBase:RU000675} (Fragment) OS=Ailuropoda melanoleuca (Giant panda) PE=3 SV=1	hypothetical protein PANDA_005062 [Ailuropoda melanoleuca]
gene15793	[G]	Carbohydrate transport and metabolism	Molecular Function: alpha-L-fucosidase activity (GO:0004560);; Cellular Component: lysosome (GO:0005764);; Biological Process: fucose metabolic process (GO:0006004);;	K01206|0|mcf:101866633|FUCA1; fucosidase, alpha-L-1, tissue; K01206 alpha-L-fucosidase [EC:3.2.1.51] (A)	[G]	Carbohydrate transport and metabolism	Tissue alpha-L-fucosidase (Precursor) GN=FUCA1 OS=Macaca fascicularis (Crab-eating macaque) PE=2 SV=1	Uncharacterized protein {ECO:0000313|Ensembl:ENSPANP00000005274} OS=Papio anubis (Olive baboon) PE=4 SV=1	PREDICTED: tissue alpha-L-fucosidase [Odobenus rosmarus divergens]
gene19435	[G]	Carbohydrate transport and metabolism	Molecular Function: sedoheptulose-7-phosphate:D-glyceraldehyde-3-phosphate glyceronetransferase activity (GO:0004801);; Cellular Component: cytoplasm (GO:0005737);; Biological Process: pentose-phosphate shunt (GO:0006098);;	K00616|0|cfa:475937|TALDO1; transaldolase 1; K00616 transaldolase [EC:2.2.1.2] (A)	[G]	Carbohydrate transport and metabolism	Transaldolase GN=TALDO1 OS=Bos taurus (Bovine) PE=2 SV=1	Transaldolase {ECO:0000256|RuleBase:RU000501} OS=Canis familiaris (Dog) PE=3 SV=1	PREDICTED: transaldolase isoform 4 [Canis lupus familiaris]
gene10946	[G]	Carbohydrate transport and metabolism	Molecular Function: alpha-1,4-glucosidase activity (GO:0004558);; Biological Process: carbohydrate metabolic process (GO:0005975);; Molecular Function: amylase activity (GO:0016160);; Molecular Function: carbohydrate binding (GO:0030246);;	K12047|0|ptg:102963503|maltase-glucoamylase, intestinal-like; K12047 maltase-glucoamylase [EC:3.2.1.20 3.2.1.3] (A)	[G]	Carbohydrate transport and metabolism	Isomaltase GN=SI OS=Oryctolagus cuniculus (Rabbit) PE=1 SV=3	Uncharacterized protein {ECO:0000313|Ensembl:ENSCAFP00000005735} OS=Canis familiaris (Dog) PE=3 SV=2	PREDICTED: maltase-glucoamylase, intestinal-like [Panthera tigris altaica]
gene12115	[G]	Carbohydrate transport and metabolism	--	--	[G]	Carbohydrate transport and metabolism	--	Uncharacterized protein {ECO:0000313|Ensembl:ENSCAFP00000004497} OS=Canis familiaris (Dog) PE=4 SV=1	PREDICTED: major facilitator superfamily domain-containing protein 2A isoform X1 [Galeopterus variegatus]
gene13800	[G]	Carbohydrate transport and metabolism	Biological Process: angiogenesis (GO:0001525);; Molecular Function: glucose-6-phosphate isomerase activity (GO:0004347);; Molecular Function: cytokine activity (GO:0005125);; Cellular Component: extracellular space (GO:0005615);; Cellular Component: nucleus (GO:0005634);; Cellular Component: cytoplasm (GO:0005737);; Cellular Component: plasma membrane (GO:0005886);; Biological Process: gluconeoge…	K01810|0|aml:100472693|glucose-6-phosphate isomerase-like; K01810 glucose-6-phosphate isomerase [EC:5.3.1.9] (A)	[G]	Carbohydrate transport and metabolism	Glucose-6-phosphate isomerase GN=GPI OS=Bos taurus (Bovine) PE=2 SV=4	Uncharacterized protein {ECO:0000313|Ensembl:ENSCAFP00000010874} OS=Canis familiaris (Dog) PE=3 SV=1	PREDICTED: glucose-6-phosphate isomerase isoformX1 [Canis lupus familiaris]
gene3201	[G]	Carbohydrate transport and metabolism	Molecular Function: magnesium ion binding (GO:0000287);; Cellular Component: stress fiber (GO:0001725);; Molecular Function: phosphoglucomutase activity (GO:0004614);; Cellular Component: cytosol (GO:0005829);; Cellular Component: spot adherens junction (GO:0005914);; Cellular Component: focal adhesion (GO:0005925);; Biological Process: glycogen biosynthetic process (GO:0005978);; Biological Proc…	K15636|2.68158e-155|pon:100433663|PGM5; phosphoglucomutase 5; K15636 phosphoglucomutase-like protein 5 (A)	[G]	Carbohydrate transport and metabolism	Phosphoglucomutase-1 GN=PGM1 OS=Oryctolagus cuniculus (Rabbit) PE=1 SV=2	Phosphoglucomutase-like protein 5 {ECO:0000313|EMBL:AFE71183.1} (Fragment) OS=Macaca mulatta (Rhesus macaque) PE=2 SV=1	phosphoglucomutase 5 [Bos taurus]
gene9870	[G]	Carbohydrate transport and metabolism	Molecular Function: alpha-L-fucosidase activity (GO:0004560);; Biological Process: fucose metabolic process (GO:0006004);;	K01206|0|pps:100976080|FUCA2; fucosidase, alpha-L- 2, plasma; K01206 alpha-L-fucosidase [EC:3.2.1.51] (A)	[G]	Carbohydrate transport and metabolism	Plasma alpha-L-fucosidase (Precursor) GN=FUCA2 OS=Pongo abelii (Sumatran orangutan) PE=2 SV=1	Uncharacterized protein {ECO:0000313|Ensembl:ENSMLUP00000014520} (Fragment) OS=Myotis lucifugus (Little brown bat) PE=4 SV=1	PREDICTED: plasma alpha-L-fucosidase [Eptesicus fuscus]
gene25510	[G]	Carbohydrate transport and metabolism	Molecular Function: 4-alpha-glucanotransferase activity (GO:0004134);; Molecular Function: amylo-alpha-1,6-glucosidase activity (GO:0004135);; Cellular Component: nucleus (GO:0005634);; Cellular Component: cytoplasm (GO:0005737);; Biological Process: glycogen biosynthetic process (GO:0005978);; Biological Process: glycogen catabolic process (GO:0005980);;	K01196|0|fca:101086077|AGL; amylo-alpha-1, 6-glucosidase, 4-alpha-glucanotransferase; K01196 glycogen debranching enzyme [EC:2.4.1.25 3.2.1.33] (A)	[G]	Carbohydrate transport and metabolism	Amylo-alpha-1,6-glucosidase GN=AGL OS=Canis familiaris (Dog) PE=2 SV=1	Uncharacterized protein {ECO:0000313|Ensembl:ENSFCAP00000020304} OS=Felis catus (Cat) PE=4 SV=1	PREDICTED: glycogen debranching enzyme isoform X1 [Panthera tigris altaica]
gene4480	[G]	Carbohydrate transport and metabolism	Molecular Function: catalytic activity (GO:0003824);;	K17526|0|myb:102260569|OVGP1; oviductal glycoprotein 1, 120kDa; K17526 oviduct-specific glycoprotein (A)	[G]	Carbohydrate transport and metabolism	Oviduct-specific glycoprotein (Precursor) GN=OVGP1 OS=Papio anubis (Olive baboon) PE=2 SV=2	Uncharacterized protein {ECO:0000313|Ensembl:ENSMLUP00000011299} OS=Myotis lucifugus (Little brown bat) PE=3 SV=1	PREDICTED: LOW QUALITY PROTEIN: oviduct-specific glycoprotein [Ceratotherium simum simum]
gene13097	[G]	Carbohydrate transport and metabolism	Cellular Component: extracellular region (GO:0005576);; Biological Process: carbohydrate metabolic process (GO:0005975);; Biological Process: chitin catabolic process (GO:0006032);; Molecular Function: chitin binding (GO:0008061);; Molecular Function: endochitinase activity (GO:0008843);;	K01183|0|ecb:100065255|CHIT1; chitinase 1 (chitotriosidase) (EC:3.2.1.14); K01183 chitinase [EC:3.2.1.14] (A)	[G]	Carbohydrate transport and metabolism	Acidic mammalian chitinase (Precursor) GN=CHIA OS=Bos taurus (Bovine) PE=1 SV=1	Chitotriosidase {ECO:0000313|EMBL:ABV53445.1} OS=Equus caballus (Horse) PE=2 SV=1	chitotriosidase-1 precursor [Equus caballus]
gene16549	[G]	Carbohydrate transport and metabolism	Biological Process: carbohydrate metabolic process (GO:0005975);; Molecular Function: hydrolase activity, acting on glycosyl bonds (GO:0016798);; Molecular Function: cation binding (GO:0043169);;	K01176|0|cfa:607460|pancreatic alpha-amylase-like; K01176 alpha-amylase [EC:3.2.1.1] (A)	[G]	Carbohydrate transport and metabolism	Pancreatic alpha-amylase (Precursor) GN=AMY2 OS=Sus scrofa (Pig) PE=1 SV=3	Alpha-amylase {ECO:0000256|RuleBase:RU361134} OS=Canis familiaris (Dog) PE=3 SV=1	PREDICTED: pancreatic alpha-amylase-like isoform 1 [Canis lupus familiaris]
gene22476	[G]	Carbohydrate transport and metabolism	Molecular Function: catalytic activity (GO:0003824);; Biological Process: carbohydrate metabolic process (GO:0005975);;	--	[G]	Carbohydrate transport and metabolism	--	Uncharacterized protein {ECO:0000313|Ensembl:ENSSSCP00000024033} OS=Sus scrofa (Pig) PE=4 SV=1	PREDICTED: LOW QUALITY PROTEIN: acid trehalase-like protein 1 [Tursiops truncatus]
gene9604	[G]	Carbohydrate transport and metabolism	Cellular Component: nucleus (GO:0005634);; Cellular Component: mitochondrion (GO:0005739);; Biological Process: inositol biosynthetic process (GO:0006021);; Biological Process: phosphatidylinositol biosynthetic process (GO:0006661);; Biological Process: signal transduction (GO:0007165);; Molecular Function: inositol monophosphate 1-phosphatase activity (GO:0008934);; Molecular Function: protein h…	K01092|2.245e-129|ocu:100346782|IMPA1; inositol(myo)-1(or 4)-monophosphatase 1; K01092 myo-inositol-1(or 4)-monophosphatase [EC:3.1.3.25] (A)	[G]	Carbohydrate transport and metabolism	Inositol monophosphatase 1 GN=IMPA1 OS=Bos taurus (Bovine) PE=1 SV=1	Uncharacterized protein {ECO:0000313|Ensembl:ENSECAP00000020565} OS=Equus caballus (Horse) PE=4 SV=1	PREDICTED: inositol monophosphatase 1 [Ochotona princeps]
gene26971	[G]	Carbohydrate transport and metabolism	Molecular Function: 6-phosphofructo-2-kinase activity (GO:0003873);; Molecular Function: fructose-2,6-bisphosphate 2-phosphatase activity (GO:0004331);; Molecular Function: ATP binding (GO:0005524);; Biological Process: fructose metabolic process (GO:0006000);; Biological Process: fructose 2,6-bisphosphate metabolic process (GO:0006003);;	K01103|4.8354e-129|cfr:102515022|PFKFB4; 6-phosphofructo-2-kinase/fructose-2,6-biphosphatase 4; K19030 6-phosphofructo-2-kinase / fructose-2,6-biphosphatase 4 [EC:2.7.1.105 3.1.3.46] (A)	[G]	Carbohydrate transport and metabolism	Fructose-2,6-bisphosphatase GN=PFKFB4 OS=Macaca fascicularis (Crab-eating macaque) PE=2 SV=3	Uncharacterized protein {ECO:0000313|Ensembl:ENSCJAP00000043810} OS=Callithrix jacchus (White-tufted-ear marmoset) PE=4 SV=1	PREDICTED: 6-phosphofructo-2-kinase/fructose-2,6-bisphosphatase 4 [Galeopterus variegatus]
gene23108	[G]	Carbohydrate transport and metabolism	Molecular Function: 6-phosphofructokinase activity (GO:0003872);; Molecular Function: protein binding (GO:0005515);; Molecular Function: ATP binding (GO:0005524);; Cellular Component: 6-phosphofructokinase complex (GO:0005945);; Biological Process: fructose 6-phosphate metabolic process (GO:0006002);; Biological Process: glycolytic process (GO:0006096);; Biological Process: phosphorylation (GO:00…	K00850|0|lve:103070954|PFKP; phosphofructokinase, platelet; K00850 6-phosphofructokinase 1 [EC:2.7.1.11] (A)	[G]	Carbohydrate transport and metabolism	ATP-dependent 6-phosphofructokinase, platelet type {ECO:0000255|HAMAP-Rule:MF_03184} GN=PFKP OS=Pongo abelii (Sumatran orangutan) PE=2 SV=1	6-phosphofructokinase {ECO:0000256|PIRNR:PIRNR000533} OS=Sus scrofa (Pig) PE=2 SV=1	PREDICTED: 6-phosphofructokinase type C [Ceratotherium simum simum]
gene4033	[G]	Carbohydrate transport and metabolism	Molecular Function: beta-mannosidase activity (GO:0004567);; Biological Process: carbohydrate metabolic process (GO:0005975);; Biological Process: glycoprotein catabolic process (GO:0006516);;	K01192|0|ecb:100067947|MANBA; mannosidase, beta A, lysosomal; K01192 beta-mannosidase [EC:3.2.1.25] (A)	[G]	Carbohydrate transport and metabolism	Beta-mannosidase (Precursor) GN=MANBA OS=Capra hircus (Goat) PE=2 SV=1	Uncharacterized protein {ECO:0000313|Ensembl:ENSECAP00000019373} (Fragment) OS=Equus caballus (Horse) PE=4 SV=1	PREDICTED: beta-mannosidase isoform 2 [Ceratotherium simum simum]
gene16754	[G]	Carbohydrate transport and metabolism	Molecular Function: UTP:glucose-1-phosphate uridylyltransferase activity (GO:0003983);; Cellular Component: cytoplasm (GO:0005737);; Biological Process: metabolic process (GO:0008152);; Molecular Function: metal ion binding (GO:0046872);;	K00963|0|ptg:102950424|UGP2; UDP-glucose pyrophosphorylase 2; K00963 UTP--glucose-1-phosphate uridylyltransferase [EC:2.7.7.9] (A)	[G]	Carbohydrate transport and metabolism	UTP--glucose-1-phosphate uridylyltransferase GN=UGP2 OS=Bos taurus (Bovine) PE=1 SV=2	Uncharacterized protein {ECO:0000313|Ensembl:ENSOARP00000021537} OS=Ovis aries (Sheep) PE=4 SV=1	PREDICTED: UTP--glucose-1-phosphate uridylyltransferase isoformX2 [Equus caballus]
gene2109	[G]	Carbohydrate transport and metabolism	Molecular Function: alpha,alpha-trehalase activity (GO:0004555);; Biological Process: trehalose metabolic process (GO:0005991);;	K01194|3.06164e-76|pale:102887836|TREH; trehalase (brush-border membrane glycoprotein); K01194 alpha,alpha-trehalase [EC:3.2.1.28] (A)	[G]	Carbohydrate transport and metabolism	Trehalase (Precursor) GN=TREH OS=Oryctolagus cuniculus (Rabbit) PE=1 SV=1	Trehalase {ECO:0000256|RuleBase:RU361180} (Fragment) OS=Neovison vison (American mink) PE=2 SV=1	PREDICTED: trehalase isoform X2 [Pteropus alecto]
gene11629	[G]	Carbohydrate transport and metabolism	Biological Process: glomerular filtration (GO:0003094);; Molecular Function: intracellular cGMP activated cation channel activity (GO:0005223);; Molecular Function: potassium channel activity (GO:0005267);; Biological Process: cGMP biosynthetic process (GO:0006182);; Biological Process: cell volume homeostasis (GO:0006884);; Cellular Component: basal plasma membrane (GO:0009925);; Molecular Funct…	K09864|0|fca:101087725|AQP1; aquaporin 1 (Colton blood group); K09864 aquaporin-1 (A)	[G]	Carbohydrate transport and metabolism	Aquaporin-1 GN=AQP1 OS=Canis familiaris (Dog) PE=2 SV=3	Uncharacterized protein {ECO:0000313|Ensembl:ENSFCAP00000020501} OS=Felis catus (Cat) PE=3 SV=1	PREDICTED: aquaporin-1 [Felis catus]
gene6393	[G]	Carbohydrate transport and metabolism	Molecular Function: ribulose-phosphate 3-epimerase activity (GO:0004750);; Biological Process: pentose-phosphate shunt (GO:0006098);; Molecular Function: protein homodimerization activity (GO:0042803);; Molecular Function: metal ion binding (GO:0046872);;	K01783|5.8598e-170|myd:102758452|RPE; ribulose-5-phosphate-3-epimerase; K01783 ribulose-phosphate 3-epimerase [EC:5.1.3.1] (A)	[G]	Carbohydrate transport and metabolism	Ribulose-phosphate 3-epimerase GN=RPE OS=Pongo abelii (Sumatran orangutan) PE=2 SV=1	Putative d-ribulose-5-phosphate 3-epimerase {ECO:0000313|EMBL:JAA50955.1} (Fragment) OS=Desmodus rotundus (Vampire bat) PE=2 SV=1	PREDICTED: ribulose-phosphate 3-epimerase isoform X1 [Ochotona princeps]
gene17267	[G]	Carbohydrate transport and metabolism	Molecular Function: glucosamine-6-phosphate deaminase activity (GO:0004342);; Cellular Component: cytoplasm (GO:0005737);; Biological Process: carbohydrate metabolic process (GO:0005975);; Biological Process: N-acetylglucosamine metabolic process (GO:0006044);; Molecular Function: hydrolase activity (GO:0016787);;	K02564|0|umr:103672697|GNPDA2; glucosamine-6-phosphate deaminase 2; K02564 glucosamine-6-phosphate deaminase [EC:3.5.99.6] (A)	[G]	Carbohydrate transport and metabolism	Glucosamine-6-phosphate isomerase 2 GN=GNPDA2 OS=Bos taurus (Bovine) PE=2 SV=1	Glucosamine-6-phosphate isomerase {ECO:0000256|RuleBase:RU361197} OS=Ailuropoda melanoleuca (Giant panda) PE=3 SV=1	PREDICTED: glucosamine-6-phosphate isomerase 2 [Ailuropoda melanoleuca]
gene26119	[G]	Carbohydrate transport and metabolism	Molecular Function: fructose-bisphosphate aldolase activity (GO:0004332);; Molecular Function: protein binding (GO:0005515);; Biological Process: glycolytic process (GO:0006096);; Biological Process: single-organism process (GO:0044699);; Biological Process: protein homotetramerization (GO:0051289);;	K01623|2.80649e-95|isc:IscW_ISCW011371|fructose 1,6-bisphosphate aldolase, putative (EC:4.1.2.13); K01623 fructose-bisphosphate aldolase, class I [EC:4.1.2.13] (A)	[G]	Carbohydrate transport and metabolism	Fructose-bisphosphate aldolase A GN=ALDOA OS=Oryctolagus cuniculus (Rabbit) PE=1 SV=2	Fructose-bisphosphate aldolase {ECO:0000256|RuleBase:RU003994} (Fragment) OS=Callithrix jacchus (White-tufted-ear marmoset) PE=3 SV=1	PREDICTED: fructose-bisphosphate aldolase A isoform X3 [Sorex araneus]
gene7146	[G]	Carbohydrate transport and metabolism	Biological Process: cellular glucose homeostasis (GO:0001678);; Molecular Function: glucokinase activity (GO:0004340);; Molecular Function: ATP binding (GO:0005524);; Cellular Component: nucleus (GO:0005634);; Cellular Component: mitochondrion (GO:0005739);; Cellular Component: cytosol (GO:0005829);; Biological Process: glycolytic process (GO:0006096);; Molecular Function: fructokinase activity (…	K00844|5.31141e-154|ecb:100072686|HKDC1; hexokinase domain containing 1; K00844 hexokinase [EC:2.7.1.1] (A)	[G]	Carbohydrate transport and metabolism	Hexokinase-1 GN=HK1 OS=Pongo abelii (Sumatran orangutan) PE=2 SV=1	Putative hexokinase HKDC1 {ECO:0000313|EMBL:ELK32374.1} OS=Myotis davidii (David's myotis) PE=3 SV=1	PREDICTED: putative hexokinase HKDC1-like, partial [Tursiops truncatus]
gene9926	[G]	Carbohydrate transport and metabolism	Molecular Function: NAD+ kinase activity (GO:0003951);; Biological Process: NADP biosynthetic process (GO:0006741);; Biological Process: NAD metabolic process (GO:0019674);;	K00858|0|aml:100478855|NADK; NAD kinase; K00858 NAD+ kinase [EC:2.7.1.23] (A)	[G]	Carbohydrate transport and metabolism	--	Uncharacterized protein {ECO:0000313|Ensembl:ENSCAFP00000028345} OS=Canis familiaris (Dog) PE=3 SV=2	PREDICTED: NAD kinase [Leptonychotes weddellii]
gene24997	[G]	Carbohydrate transport and metabolism	Molecular Function: magnesium ion binding (GO:0000287);; Molecular Function: phosphoglucomutase activity (GO:0004614);; Cellular Component: cytosol (GO:0005829);; Biological Process: glucose metabolic process (GO:0006006);; Molecular Function: phosphopentomutase activity (GO:0008973);; Biological Process: carbohydrate catabolic process (GO:0016052);;	K15779|0|cfa:479116|PGM2; phosphoglucomutase 2; K15779 phosphoglucomutase / phosphopentomutase [EC:5.4.2.2 5.4.2.7] (A)	[G]	Carbohydrate transport and metabolism	Phosphoglucomutase-2 GN=PGM2 OS=Pongo abelii (Sumatran orangutan) PE=2 SV=3	Uncharacterized protein {ECO:0000313|Ensembl:ENSCAFP00000023951} OS=Canis familiaris (Dog) PE=4 SV=1	PREDICTED: phosphoglucomutase-2 [Canis lupus familiaris]
gene24116	[G]	Carbohydrate transport and metabolism	Molecular Function: 6-phosphofructo-2-kinase activity (GO:0003873);; Molecular Function: fructose-2,6-bisphosphate 2-phosphatase activity (GO:0004331);; Molecular Function: ATP binding (GO:0005524);; Biological Process: fructose metabolic process (GO:0006000);; Biological Process: fructose 2,6-bisphosphate metabolic process (GO:0006003);;	K01103|0|fca:101089572|PFKFB2; 6-phosphofructo-2-kinase/fructose-2,6-biphosphatase 2; K19029 6-phosphofructo-2-kinase / fructose-2,6-biphosphatase 2 [EC:2.7.1.105 3.1.3.46] (A)	[G]	Carbohydrate transport and metabolism	Fructose-2,6-bisphosphatase GN=PFKFB2 OS=Bos taurus (Bovine) PE=1 SV=2	Uncharacterized protein {ECO:0000313|Ensembl:ENSECAP00000008177} OS=Equus caballus (Horse) PE=4 SV=1	PREDICTED: 6-phosphofructo-2-kinase/fructose-2,6-bisphosphatase 2 [Leptonychotes weddellii]
gene22463	[G]	Carbohydrate transport and metabolism	Cellular Component: phosphopyruvate hydratase complex (GO:0000015);; Molecular Function: magnesium ion binding (GO:0000287);; Cellular Component: photoreceptor inner segment (GO:0001917);; Molecular Function: phosphopyruvate hydratase activity (GO:0004634);; Biological Process: glycolytic process (GO:0006096);; Cellular Component: perikaryon (GO:0043204);;	K01689|0|nle:100600313|ENO2; enolase 2 (gamma, neuronal); K01689 enolase [EC:4.2.1.11] (A)	[G]	Carbohydrate transport and metabolism	Alpha-enolase GN=ENO1 OS=Bos taurus (Bovine) PE=1 SV=4	Uncharacterized protein {ECO:0000313|Ensembl:ENSNLEP00000005969} OS=Nomascus leucogenys (Northern white-cheeked gibbon) PE=3 SV=1	PREDICTED: gamma-enolase isoform X3 [Mustela putorius furo]
gene2395	[G]	Carbohydrate transport and metabolism	Molecular Function: hydrolase activity, hydrolyzing O-glycosyl compounds (GO:0004553);; Biological Process: carbohydrate metabolic process (GO:0005975);;	K05350|0|ecb:100067990|GBA3; glucosidase, beta, acid 3; K05350 beta-glucosidase [EC:3.2.1.21] (A)	[G]	Carbohydrate transport and metabolism	Cytosolic beta-glucosidase GN=GBA3 OS=Pongo abelii (Sumatran orangutan) PE=2 SV=1	Uncharacterized protein {ECO:0000313|Ensembl:ENSECAP00000011973} OS=Equus caballus (Horse) PE=3 SV=1	PREDICTED: cytosolic beta-glucosidase [Equus caballus]
gene705	[G]	Carbohydrate transport and metabolism	Molecular Function: hydrolase activity, hydrolyzing O-glycosyl compounds (GO:0004553);; Biological Process: carbohydrate metabolic process (GO:0005975);;	--	[G]	Carbohydrate transport and metabolism	Lysosomal alpha-glucosidase (Precursor) GN=GAA OS=Bos taurus (Bovine) PE=2 SV=1	Uncharacterized protein {ECO:0000313|Ensembl:ENSFCAP00000019310} OS=Felis catus (Cat) PE=3 SV=1	TPA: CG14476-like [Bos taurus]
gene10945	[G]	Carbohydrate transport and metabolism	--	K12047|0|bta:100296901|probable maltase-glucoamylase-like protein; K12047 maltase-glucoamylase [EC:3.2.1.20 3.2.1.3] (A)	[G]	Carbohydrate transport and metabolism	Isomaltase GN=SI OS=Oryctolagus cuniculus (Rabbit) PE=1 SV=3	Uncharacterized protein {ECO:0000313|Ensembl:ENSOARP00000016083} OS=Ovis aries (Sheep) PE=3 SV=1	PREDICTED: maltase-glucoamylase, intestinal-like [Equus przewalskii]
gene6133	[G]	Carbohydrate transport and metabolism	Biological Process: cellular glucose homeostasis (GO:0001678);; Molecular Function: glucokinase activity (GO:0004340);; Molecular Function: ATP binding (GO:0005524);; Molecular Function: glucose binding (GO:0005536);; Cellular Component: nucleus (GO:0005634);; Cellular Component: mitochondrion (GO:0005739);; Cellular Component: cytosol (GO:0005829);; Biological Process: glycolytic process (GO:000…	K12407|0|oas:101117412|GCK; glucokinase (hexokinase 4) (EC:2.7.1.2); K12407 glucokinase [EC:2.7.1.2] (A)	[G]	Carbohydrate transport and metabolism	Hexokinase-2 GN=HK2 OS=Equus caballus (Horse) PE=2 SV=1	Uncharacterized protein {ECO:0000313|Ensembl:ENSOARP00000017168} OS=Ovis aries (Sheep) PE=2 SV=1	glucokinase (hexokinase 4) [Ovis aries]
gene19291	[G]	Carbohydrate transport and metabolism	Biological Process: renal water transport (GO:0003097);; Molecular Function: glycerol transmembrane transporter activity (GO:0015168);; Molecular Function: water channel activity (GO:0015250);; Cellular Component: integral component of membrane (GO:0016021);; Cellular Component: apical plasma membrane (GO:0016324);; Cellular Component: cytoplasmic vesicle (GO:0031410);; Biological Process: cellul…	K09865|2.63542e-120|ssc:100147810|AQP2; aquaporin 2 (collecting duct); K09865 aquaporin-2 (A)	[G]	Carbohydrate transport and metabolism	Aquaporin-2 GN=AQP2 OS=Bos taurus (Bovine) PE=2 SV=2	Uncharacterized protein {ECO:0000313|Ensembl:ENSSSCP00000023437} OS=Sus scrofa (Pig) PE=2 SV=1	PREDICTED: aquaporin-2 isoform X1 [Bubalus bubalis]
gene5006	[G]	Carbohydrate transport and metabolism	Molecular Function: alpha-mannosidase activity (GO:0004559);; Biological Process: mannose metabolic process (GO:0006013);; Molecular Function: zinc ion binding (GO:0008270);; Molecular Function: carbohydrate binding (GO:0030246);;	K01191|0|lve:103075945|MAN2C1; mannosidase, alpha, class 2C, member 1; K01191 alpha-mannosidase [EC:3.2.1.24] (A)	[G]	Carbohydrate transport and metabolism	--	Alpha-mannosidase {ECO:0000256|RuleBase:RU361199} OS=Equus caballus (Horse) PE=3 SV=1	PREDICTED: alpha-mannosidase 2C1 isoform X2 [Equus caballus]
gene20200	[G]	Carbohydrate transport and metabolism	Molecular Function: hydrolase activity, hydrolyzing O-glycosyl compounds (GO:0004553);; Molecular Function: fibroblast growth factor receptor binding (GO:0005104);; Biological Process: carbohydrate metabolic process (GO:0005975);; Biological Process: energy reserve metabolic process (GO:0006112);; Biological Process: aging (GO:0007568);; Molecular Function: fibroblast growth factor binding (GO:00…	K14756|0|aml:100473623|klotho-like; K14756 klotho [EC:3.2.1.31] (A)	[G]	Carbohydrate transport and metabolism	Klotho peptide (Precursor) GN=KL OS=Macaca fascicularis (Crab-eating macaque) PE=2 SV=1	Uncharacterized protein {ECO:0000313|Ensembl:ENSAMEP00000009817} (Fragment) OS=Ailuropoda melanoleuca (Giant panda) PE=3 SV=1	PREDICTED: klotho [Leptonychotes weddellii]
gene5703	[G]	Carbohydrate transport and metabolism	Molecular Function: transporter activity (GO:0005215);; Cellular Component: plasma membrane (GO:0005886);; Cellular Component: cell-cell junction (GO:0005911);; Biological Process: glycerol transport (GO:0015793);; Cellular Component: integral component of membrane (GO:0016021);; Biological Process: renal water absorption (GO:0070295);;	K08771|0|fca:101101423|AQP7; aquaporin 7; K08771 aquaporin-7 (A)	[G]	Carbohydrate transport and metabolism	Aquaporin-7 GN=AQP7 OS=Macaca fascicularis (Crab-eating macaque) PE=2 SV=1	Uncharacterized protein {ECO:0000313|Ensembl:ENSFCAP00000018493} (Fragment) OS=Felis catus (Cat) PE=3 SV=1	PREDICTED: aquaporin-7 isoform 1 [Ceratotherium simum simum]
gene15073	[G]	Carbohydrate transport and metabolism	Cellular Component: phosphopyruvate hydratase complex (GO:0000015);; Molecular Function: magnesium ion binding (GO:0000287);; Molecular Function: phosphopyruvate hydratase activity (GO:0004634);; Cellular Component: plasma membrane (GO:0005886);; Biological Process: glycolytic process (GO:0006096);; Biological Process: response to virus (GO:0009615);; Biological Process: negative regulation of ce…	K01689|0|ptg:102960793|ENO1; enolase 1, (alpha); K01689 enolase [EC:4.2.1.11] (A)	[G]	Carbohydrate transport and metabolism	Alpha-enolase GN=ENO1 OS=Bos taurus (Bovine) PE=1 SV=4	Uncharacterized protein {ECO:0000313|Ensembl:ENSFCAP00000009373} OS=Felis catus (Cat) PE=3 SV=1	PREDICTED: alpha-enolase isoform X1 [Panthera tigris altaica]
gene3309	[G]	Carbohydrate transport and metabolism	Biological Process: neutrophil homeostasis (GO:0001780);; Biological Process: myeloid progenitor cell differentiation (GO:0002318);; Molecular Function: transporter activity (GO:0005215);; Biological Process: glycogen metabolic process (GO:0005977);; Biological Process: lactate metabolic process (GO:0006089);; Biological Process: triglyceride metabolic process (GO:0006641);; Biological Process: c…	K08171|0|mcf:101867441|uncharacterized LOC101867441; K08171 MFS transporter, OPA family, solute carrier family 37 (glycerol-6-phosphate transporter), member 4 (A)	[G]	Carbohydrate transport and metabolism	--	Macaca fascicularis brain cDNA clone: QflA-22323, similar to human solute carrier family 37 (glycerol-6-phosphatetransporter), member 4 (SLC37A4), mRNA, RefSeq: NM_001467.2 {ECO:0000313|EMBL:BAE88707.1} OS=Macaca fascicularis (Crab-eating macaque) PE=2 SV=1	PREDICTED: glucose-6-phosphate translocase isoformX1 [Canis lupus familiaris]
gene4436	[G]	Carbohydrate transport and metabolism	Molecular Function: hydrolase activity, hydrolyzing O-glycosyl compounds (GO:0004553);; Cellular Component: endoplasmic reticulum (GO:0005783);; Biological Process: carbohydrate metabolic process (GO:0005975);;	--	[G]	Carbohydrate transport and metabolism	Phlorizin hydrolase (Precursor) GN=LCT OS=Oryctolagus cuniculus (Rabbit) PE=1 SV=1	Uncharacterized protein {ECO:0000313|Ensembl:ENSCAFP00000025530} OS=Canis familiaris (Dog) PE=3 SV=1	PREDICTED: lactase-like [Canis lupus familiaris]
gene23343	[G]	Carbohydrate transport and metabolism	Molecular Function: alpha-mannosidase activity (GO:0004559);; Biological Process: mannose metabolic process (GO:0006013);; Molecular Function: zinc ion binding (GO:0008270);; Molecular Function: hydrolase activity, hydrolyzing N-glycosyl compounds (GO:0016799);; Molecular Function: carbohydrate binding (GO:0030246);;	K01231|0|cfa:488745|MAN2A2; mannosidase, alpha, class 2A, member 2; K01231 alpha-mannosidase II [EC:3.2.1.114] (A)	[G]	Carbohydrate transport and metabolism	Epididymis-specific alpha-mannosidase (Precursor) GN=MAN2B2 OS=Sus scrofa (Pig) PE=1 SV=2	Alpha-mannosidase {ECO:0000256|RuleBase:RU361199} OS=Felis catus (Cat) PE=3 SV=1	PREDICTED: alpha-mannosidase 2x isoform X1 [Canis lupus familiaris]
gene5594	[G]	Carbohydrate transport and metabolism	Biological Process: gluconeogenesis (GO:0006094);; Molecular Function: fructose 1,6-bisphosphate 1-phosphatase activity (GO:0042132);; Molecular Function: metal ion binding (GO:0046872);;	K03841|0|cge:100761248|Fbp2; fructose-1,6-bisphosphatase 2; K03841 fructose-1,6-bisphosphatase I [EC:3.1.3.11] (A)	[G]	Carbohydrate transport and metabolism	Fructose-1,6-bisphosphatase isozyme 2 GN=FBP2 OS=Bos taurus (Bovine) PE=2 SV=1	Uncharacterized protein {ECO:0000313|Ensembl:ENSOARP00000009302} OS=Ovis aries (Sheep) PE=3 SV=1	PREDICTED: fructose-1,6-bisphosphatase isozyme 2 [Ceratotherium simum simum]
gene1222	[G]	Carbohydrate transport and metabolism	Molecular Function: transporter activity (GO:0005215);; Cellular Component: integral component of membrane (GO:0016021);; Biological Process: transmembrane transport (GO:0055085);;	K03447|0|aml:100481313|sugar phosphate exchanger 3-like; K03447 MFS transporter, OPA family, solute carrier family 37 (glycerol-3-phosphate transporter), member 3 (A)	[G]	Carbohydrate transport and metabolism	Sugar phosphate exchanger 3 GN=SLC37A3 OS=Bos taurus (Bovine) PE=2 SV=1	Uncharacterized protein {ECO:0000313|Ensembl:ENSAMEP00000018859} OS=Ailuropoda melanoleuca (Giant panda) PE=4 SV=1	PREDICTED: sugar phosphate exchanger 3 isoform X1 [Balaenoptera acutorostrata scammoni]
gene26178	[G]	Carbohydrate transport and metabolism	Molecular Function: hydrolase activity, hydrolyzing O-glycosyl compounds (GO:0004553);; Biological Process: metabolic process (GO:0008152);;	--	[G]	Carbohydrate transport and metabolism	Beta-galactosidase-1-like protein (Precursor) GN=GLB1L OS=Macaca fascicularis (Crab-eating macaque) PE=2 SV=1	Beta-galactosidase {ECO:0000256|RuleBase:RU000675} (Fragment) OS=Equus caballus (Horse) PE=3 SV=1	PREDICTED: beta-galactosidase-1-like protein 3 [Equus caballus]
gene15075	[G]	Carbohydrate transport and metabolism	Molecular Function: purine nucleobase transmembrane transporter activity (GO:0005345);; Molecular Function: pyrimidine nucleobase transmembrane transporter activity (GO:0005350);; Biological Process: water transport (GO:0006833);; Biological Process: purine nucleobase transport (GO:0006863);; Molecular Function: glycerol channel activity (GO:0015254);; Biological Process: polyol transport (GO:001…	K09877|0|cfa:487576|AQP9; aquaporin 9; K09877 aquaporin-9 (A)	[G]	Carbohydrate transport and metabolism	Aquaporin-3 GN=AQP3 OS=Sus scrofa (Pig) PE=2 SV=1	Uncharacterized protein {ECO:0000313|Ensembl:ENSMPUP00000004365} OS=Mustela putorius furo (European domestic ferret) PE=3 SV=1	PREDICTED: aquaporin-9 [Mustela putorius furo]
gene15909	[G]	Carbohydrate transport and metabolism	Molecular Function: phosphoglucomutase activity (GO:0004614);; Cellular Component: cytosol (GO:0005829);; Biological Process: carbohydrate catabolic process (GO:0016052);; Molecular Function: glucose-1,6-bisphosphate synthase activity (GO:0047933);;	K11809|0|pale:102894374|PGM2L1; phosphoglucomutase 2-like 1; K11809 glucose-1,6-bisphosphate synthase [EC:2.7.1.106] (A)	[G]	Carbohydrate transport and metabolism	Glucose 1,6-bisphosphate synthase GN=PGM2L1 OS=Pongo abelii (Sumatran orangutan) PE=2 SV=1	Glucose 1,6-bisphosphate synthase {ECO:0000313|EMBL:ELK00360.1} OS=Pteropus alecto (Black flying fox) PE=4 SV=1	PREDICTED: glucose 1,6-bisphosphate synthase [Pteropus alecto]
gene26114	[G]	Carbohydrate transport and metabolism	--	--	[G]	Carbohydrate transport and metabolism	Inositol monophosphatase 1 GN=IMPA1 OS=Pongo abelii (Sumatran orangutan) PE=2 SV=1	Uncharacterized protein {ECO:0000313|Ensembl:ENSMODP00000035234} OS=Monodelphis domestica (Gray short-tailed opossum) PE=4 SV=2	PREDICTED: inositol-phosphate phosphatase-like [Pantholops hodgsonii]
gene1472	[G]	Carbohydrate transport and metabolism	Molecular Function: phosphoglycerate kinase activity (GO:0004618);; Molecular Function: ATP binding (GO:0005524);; Cellular Component: cytoplasm (GO:0005737);; Biological Process: glycolytic process (GO:0006096);; Biological Process: phosphorylation (GO:0016310);;	K00927|0|ptr:473678|PGK1; phosphoglycerate kinase 1 (EC:2.7.2.3); K00927 phosphoglycerate kinase [EC:2.7.2.3] (A)	[G]	Carbohydrate transport and metabolism	Phosphoglycerate kinase 1 GN=PGK1 OS=Pan troglodytes (Chimpanzee) PE=2 SV=1	Phosphoglycerate kinase {ECO:0000256|RuleBase:RU000532} OS=Pan troglodytes (Chimpanzee) PE=2 SV=1	phosphoglycerate kinase 1 [Bos taurus]
gene3575	[G]	Carbohydrate transport and metabolism	Molecular Function: ketohexokinase activity (GO:0004454);; Cellular Component: cytoplasm (GO:0005737);;	K00846|0|bta:614868|KHK; ketohexokinase (fructokinase) (EC:2.7.1.3); K00846 ketohexokinase [EC:2.7.1.3] (A)	[G]	Carbohydrate transport and metabolism	Ketohexokinase GN=KHK OS=Pongo abelii (Sumatran orangutan) PE=3 SV=1	Ketohexokinase {ECO:0000313|EMBL:ELK14057.1} OS=Pteropus alecto (Black flying fox) PE=4 SV=1	Ketohexokinase [Pteropus alecto]
gene1756	[G]	Carbohydrate transport and metabolism	Molecular Function: transketolase activity (GO:0004802);; Cellular Component: nucleus (GO:0005634);; Biological Process: regulation of growth (GO:0040008);; Molecular Function: protein homodimerization activity (GO:0042803);; Biological Process: glyceraldehyde-3-phosphate biosynthetic process (GO:0046166);; Molecular Function: metal ion binding (GO:0046872);; Molecular Function: cofactor binding …	K00615|0|cjc:100396350|TKT; transketolase; K00615 transketolase [EC:2.2.1.1] (A)	[G]	Carbohydrate transport and metabolism	Transketolase GN=TKT OS=Macaca fascicularis (Crab-eating macaque) PE=2 SV=1	Transketolase {ECO:0000256|RuleBase:RU004996} OS=Desmodus rotundus (Vampire bat) PE=2 SV=1	PREDICTED: transketolase isoform X1 [Pantholops hodgsonii]
gene19705	[G]	Carbohydrate transport and metabolism	Molecular Function: beta-glucuronidase activity (GO:0004566);; Cellular Component: lysosome (GO:0005764);; Biological Process: carbohydrate metabolic process (GO:0005975);;	K01195|0|fca:493879|GUSB; glucuronidase, beta (EC:3.2.1.31); K01195 beta-glucuronidase [EC:3.2.1.31] (A)	[G]	Carbohydrate transport and metabolism	Beta-glucuronidase (Precursor) GN=GUSB OS=Felis catus (Cat) PE=1 SV=1	Beta-glucuronidase {ECO:0000256|RuleBase:RU361154} (Fragment) OS=Felis catus (Cat) PE=3 SV=1	beta-glucuronidase precursor [Felis catus]
gene19600	[G]	Carbohydrate transport and metabolism	Molecular Function: glucosamine-6-phosphate deaminase activity (GO:0004342);; Cellular Component: cytoplasm (GO:0005737);; Biological Process: carbohydrate metabolic process (GO:0005975);; Biological Process: glucosamine catabolic process (GO:0006043);; Biological Process: N-acetylglucosamine metabolic process (GO:0006044);; Biological Process: generation of precursor metabolites and energy (GO:0…	K02564|0|cfa:478043|GNPDA1; glucosamine-6-phosphate deaminase 1; K02564 glucosamine-6-phosphate deaminase [EC:3.5.99.6] (A)	[G]	Carbohydrate transport and metabolism	Glucosamine-6-phosphate isomerase 1 GN=GNPDA1 OS=Bos taurus (Bovine) PE=2 SV=1	Glucosamine-6-phosphate isomerase {ECO:0000256|RuleBase:RU361197} OS=Canis familiaris (Dog) PE=3 SV=1	PREDICTED: glucosamine-6-phosphate isomerase 1 isoform X2 [Canis lupus familiaris]
gene5702	[G]	Carbohydrate transport and metabolism	Biological Process: positive regulation of immune system process (GO:0002684);; Cellular Component: cytoplasm (GO:0005737);; Cellular Component: cell-cell junction (GO:0005911);; Molecular Function: water channel activity (GO:0015250);; Molecular Function: glycerol channel activity (GO:0015254);; Biological Process: glycerol transport (GO:0015793);; Biological Process: urea transport (GO:0015840)…	K09876|0|cfa:611792|AQP3; aquaporin 3 (Gill blood group); K09876 aquaporin-3 (A)	[G]	Carbohydrate transport and metabolism	Aquaporin-3 GN=AQP3 OS=Bos taurus (Bovine) PE=2 SV=1	Uncharacterized protein {ECO:0000313|Ensembl:ENSCAFP00000002716} OS=Canis familiaris (Dog) PE=3 SV=1	PREDICTED: aquaporin-3 [Canis lupus familiaris]
gene9260	[G]	Carbohydrate transport and metabolism	Biological Process: N-acetylglucosamine metabolic process (GO:0006044);; Molecular Function: N-acylmannosamine kinase activity (GO:0009384);; Molecular Function: N-acetylglucosamine kinase activity (GO:0045127);;	K00884|0|ocu:100347215|NAGK; N-acetylglucosamine kinase; K00884 N-acetylglucosamine kinase [EC:2.7.1.59] (A)	[G]	Carbohydrate transport and metabolism	N-acetyl-D-glucosamine kinase GN=NAGK OS=Bos taurus (Bovine) PE=2 SV=1	Uncharacterized protein {ECO:0000313|Ensembl:ENSOCUP00000007686} (Fragment) OS=Oryctolagus cuniculus (Rabbit) PE=4 SV=1	PREDICTED: N-acetyl-D-glucosamine kinase isoform X1 [Oryctolagus cuniculus]
gene17134	[G]	Carbohydrate transport and metabolism	Molecular Function: aldose 1-epimerase activity (GO:0004034);; Biological Process: hexose metabolic process (GO:0019318);; Molecular Function: carbohydrate binding (GO:0030246);;	K01785|0|pale:102884815|GALM; galactose mutarotase (aldose 1-epimerase); K01785 aldose 1-epimerase [EC:5.1.3.3] (A)	[G]	Carbohydrate transport and metabolism	Aldose 1-epimerase GN=GALM OS=Sus scrofa (Pig) PE=2 SV=1	Aldose 1-epimerase {ECO:0000256|PIRNR:PIRNR005096} OS=Pteropus alecto (Black flying fox) PE=3 SV=1	PREDICTED: aldose 1-epimerase [Pteropus alecto]
gene24163	[G]	Carbohydrate transport and metabolism	Molecular Function: magnesium ion binding (GO:0000287);; Cellular Component: stress fiber (GO:0001725);; Molecular Function: phosphoglucomutase activity (GO:0004614);; Cellular Component: cytosol (GO:0005829);; Cellular Component: spot adherens junction (GO:0005914);; Cellular Component: focal adhesion (GO:0005925);; Biological Process: glycogen biosynthetic process (GO:0005978);; Biological Proc…	K15636|0|oas:101108630|PGM5; phosphoglucomutase 5; K15636 phosphoglucomutase-like protein 5 (A)	[G]	Carbohydrate transport and metabolism	Phosphoglucomutase-1 GN=PGM1 OS=Bos taurus (Bovine) PE=2 SV=1	Uncharacterized protein {ECO:0000313|Ensembl:ENSOARP00000014040} OS=Ovis aries (Sheep) PE=3 SV=1	PREDICTED: phosphoglucomutase-like protein 5 [Ovis aries]
gene19131	[G]	Carbohydrate transport and metabolism	Biological Process: carbohydrate metabolic process (GO:0005975);; Molecular Function: kinase activity (GO:0016301);; Biological Process: phosphorylation (GO:0016310);;	--	[G]	Carbohydrate transport and metabolism	--	Uncharacterized protein {ECO:0000313|Ensembl:ENSMPUP00000002005} OS=Mustela putorius furo (European domestic ferret) PE=4 SV=1	PREDICTED: probable gluconokinase isoform X2 [Mustela putorius furo]
gene25008	[G]	Carbohydrate transport and metabolism	Biological Process: microtubule cytoskeleton organization (GO:0000226);; Molecular Function: glyceraldehyde-3-phosphate dehydrogenase (NAD+) (phosphorylating) activity (GO:0004365);; Cellular Component: nucleus (GO:0005634);; Cellular Component: cytosol (GO:0005829);; Biological Process: glycolytic process (GO:0006096);; Biological Process: regulation of translation (GO:0006417);; Molecular Funct…	K00134|0|pale:102888425|GAPDH; glyceraldehyde-3-phosphate dehydrogenase; K00134 glyceraldehyde 3-phosphate dehydrogenase [EC:1.2.1.12] (A)	[G]	Carbohydrate transport and metabolism	Glyceraldehyde-3-phosphate dehydrogenase GN=GAPDH OS=Felis catus (Cat) PE=2 SV=3	Glyceraldehyde-3-phosphate dehydrogenase {ECO:0000256|RuleBase:RU361160} OS=Tupaia belangeri (Common tree shrew) PE=2 SV=1	glyceraldehyde-3-phosphate dehydrogenase [Tupaia belangeri]
gene12903	[G]	Carbohydrate transport and metabolism	Molecular Function: catalytic activity (GO:0003824);; Cellular Component: cytoplasm (GO:0005737);; Biological Process: metabolic process (GO:0008152);;	K00615|0|pale:102895016|TKTL2; transketolase-like 2; K00615 transketolase [EC:2.2.1.1] (A)	[G]	Carbohydrate transport and metabolism	Transketolase-like protein 2 GN=TKTL2 OS=Bos taurus (Bovine) PE=2 SV=1	Transketolase-like protein 2 {ECO:0000313|EMBL:ELK08321.1} OS=Pteropus alecto (Black flying fox) PE=4 SV=1	PREDICTED: transketolase-like protein 2 isoform X1 [Pteropus alecto]
gene18209	[G]	Carbohydrate transport and metabolism	Molecular Function: magnesium ion binding (GO:0000287);; Molecular Function: pyruvate kinase activity (GO:0004743);; Molecular Function: ATP binding (GO:0005524);; Biological Process: glycolytic process (GO:0006096);; Biological Process: phosphorylation (GO:0016310);; Molecular Function: potassium ion binding (GO:0030955);; Biological Process: response to other organism (GO:0051707);;	K12406|0|ggo:101129346|PKLR; pyruvate kinase isozymes R/L isoform 1; K12406 pyruvate kinase isozymes R/L [EC:2.7.1.40] (A)	[G]	Carbohydrate transport and metabolism	Pyruvate kinase PKLR GN=PKLR OS=Canis familiaris (Dog) PE=2 SV=2	Pyruvate kinase {ECO:0000256|RuleBase:RU000504} (Fragment) OS=Gorilla gorilla gorilla (Lowland gorilla) PE=3 SV=1	PREDICTED: pyruvate kinase isozymes R/L [Condylura cristata]
gene19293	[G]	Carbohydrate transport and metabolism	Molecular Function: anion channel activity (GO:0005253);; Biological Process: transport (GO:0006810);; Cellular Component: integral component of membrane (GO:0016021);; Biological Process: odontogenesis (GO:0042476);;	K09868|1.58696e-138|ecb:100629869|AQP6; aquaporin 6, kidney specific; K09868 aquaporin-6 (A)	[G]	Carbohydrate transport and metabolism	Aquaporin-2 GN=AQP2 OS=Bos taurus (Bovine) PE=2 SV=2	Uncharacterized protein {ECO:0000313|Ensembl:ENSOGAP00000004158} OS=Otolemur garnettii (Small-eared galago) PE=3 SV=1	PREDICTED: aquaporin-6 [Equus caballus]
gene7149	[G]	Carbohydrate transport and metabolism	Biological Process: cellular glucose homeostasis (GO:0001678);; Molecular Function: glucokinase activity (GO:0004340);; Molecular Function: ATP binding (GO:0005524);; Cellular Component: nucleus (GO:0005634);; Cellular Component: mitochondrial outer membrane (GO:0005741);; Cellular Component: cytosol (GO:0005829);; Biological Process: glycolytic process (GO:0006096);; Molecular Function: fructoki…	K00844|0|aml:100483319|hexokinase-1-like; K00844 hexokinase [EC:2.7.1.1] (A)	[G]	Carbohydrate transport and metabolism	Hexokinase-1 GN=HK1 OS=Pongo abelii (Sumatran orangutan) PE=2 SV=1	Uncharacterized protein {ECO:0000313|Ensembl:ENSMPUP00000004423} OS=Mustela putorius furo (European domestic ferret) PE=3 SV=1	PREDICTED: hexokinase-1 [Ceratotherium simum simum]
gene8892	[G]	Carbohydrate transport and metabolism	Molecular Function: catalytic activity (GO:0003824);; Biological Process: carbohydrate metabolic process (GO:0005975);; Molecular Function: cation binding (GO:0043169);;	K06519|0|cfa:483777|SLC3A2; solute carrier family 3 (amino acid transporter heavy chain), member 2; K06519 solute carrier family 3, member 2 (A)	[G]	Carbohydrate transport and metabolism	4F2 cell-surface antigen heavy chain OS=Oryctolagus cuniculus (Rabbit) PE=1 SV=2	Uncharacterized protein {ECO:0000313|Ensembl:ENSCAFP00000022829} OS=Canis familiaris (Dog) PE=4 SV=2	PREDICTED: 4F2 cell-surface antigen heavy chain [Ceratotherium simum simum]
gene26391	[G]	Carbohydrate transport and metabolism	Molecular Function: 6-phosphofructo-2-kinase activity (GO:0003873);; Molecular Function: fructose-2,6-bisphosphate 2-phosphatase activity (GO:0004331);; Molecular Function: ATP binding (GO:0005524);; Biological Process: fructose metabolic process (GO:0006000);; Biological Process: fructose 2,6-bisphosphate metabolic process (GO:0006003);;	K01103|2.05212e-63|cfa:484777|PFKFB4; 6-phosphofructo-2-kinase/fructose-2,6-biphosphatase 4; K19030 6-phosphofructo-2-kinase / fructose-2,6-biphosphatase 4 [EC:2.7.1.105 3.1.3.46] (A)	[G]	Carbohydrate transport and metabolism	Fructose-2,6-bisphosphatase GN=PFKFB4 OS=Macaca fascicularis (Crab-eating macaque) PE=2 SV=3	6-phosphofructo-2-kinase/fructose-2, 6-biphosphatase 4 {ECO:0000313|EMBL:AFE71899.1} (Fragment) OS=Macaca mulatta (Rhesus macaque) PE=2 SV=1	PREDICTED: 6-phosphofructo-2-kinase/fructose-2,6-bisphosphatase 4 [Tursiops truncatus]
gene14962	[G]	Carbohydrate transport and metabolism	Molecular Function: catalytic activity (GO:0003824);; Cellular Component: mitochondrial inner membrane (GO:0005743);; Biological Process: carbohydrate metabolic process (GO:0005975);; Molecular Function: cation binding (GO:0043169);;	K14210|1.30978e-175|pale:102898332|SLC3A1; solute carrier family 3 (amino acid transporter heavy chain), member 1; K14210 solute carrier family 3 (neutral and basic amino acid transporter), member 1 (A)	[G]	Carbohydrate transport and metabolism	4F2 cell-surface antigen heavy chain OS=Oryctolagus cuniculus (Rabbit) PE=1 SV=2	Neutral and basic amino acid transport protein rBAT {ECO:0000313|EMBL:ELK14741.1} OS=Pteropus alecto (Black flying fox) PE=4 SV=1	PREDICTED: neutral and basic amino acid transport protein rBAT [Pteropus alecto]
gene17264	[G]	Carbohydrate transport and metabolism	Molecular Function: transporter activity (GO:0005215);; Cellular Component: integral component of membrane (GO:0016021);; Biological Process: transmembrane transport (GO:0055085);;	K13783|0|fca:101093794|SLC37A1; solute carrier family 37 (glucose-6-phosphate transporter), member 1; K13783 MFS transporter, OPA family, solute carrier family 37 (glycerol-3-phosphate transporter), member 1/2 (A)	[G]	Carbohydrate transport and metabolism	Sugar phosphate exchanger 2 GN=SLC37A2 OS=Bos taurus (Bovine) PE=2 SV=1	Uncharacterized protein {ECO:0000313|Ensembl:ENSFCAP00000011783} OS=Felis catus (Cat) PE=4 SV=1	PREDICTED: glycerol-3-phosphate transporter [Felis catus]
gene7115	[G]	Carbohydrate transport and metabolism	Molecular Function: xylulokinase activity (GO:0004856);; Molecular Function: ATP binding (GO:0005524);; Biological Process: xylulose metabolic process (GO:0005997);; Biological Process: D-xylose metabolic process (GO:0042732);;	K00854|0|ecb:100049952|XYLB; xylulokinase homolog (H. influenzae); K00854 xylulokinase [EC:2.7.1.17] (A)	[G]	Carbohydrate transport and metabolism	Xylulose kinase GN=XYLB OS=Pongo abelii (Sumatran orangutan) PE=2 SV=1	Uncharacterized protein {ECO:0000313|Ensembl:ENSECAP00000020856} (Fragment) OS=Equus caballus (Horse) PE=4 SV=1	PREDICTED: xylulose kinase isoform 2 [Ceratotherium simum simum]
gene19185	[G]	Carbohydrate transport and metabolism	Molecular Function: adenosine kinase activity (GO:0004001);; Biological Process: purine ribonucleoside salvage (GO:0006166);; Molecular Function: phosphotransferase activity, alcohol group as acceptor (GO:0016773);;	K00856|1.32661e-78|pale:102895250|uncharacterized LOC102895250; K00856 adenosine kinase [EC:2.7.1.20] (A)	[G]	Carbohydrate transport and metabolism	--	Adenosine kinase-like protein {ECO:0000313|EMBL:AEB61460.1} (Fragment) OS=Equus caballus (Horse) PE=2 SV=1	PREDICTED: adenosine kinase-like, partial [Vicugna pacos]
gene3954	[G]	Carbohydrate transport and metabolism	Biological Process: polysaccharide catabolic process (GO:0000272);; Biological Process: production of molecular mediator involved in inflammatory response (GO:0002532);; Molecular Function: chitinase activity (GO:0004568);; Cellular Component: extracellular space (GO:0005615);; Cellular Component: cytoplasm (GO:0005737);; Biological Process: chitin catabolic process (GO:0006032);; Biological Proc…	K01183|0|pps:100977638|CHIA; chitinase, acidic; K01183 chitinase [EC:3.2.1.14] (A)	[G]	Carbohydrate transport and metabolism	Acidic mammalian chitinase (Precursor) GN=CHIA OS=Bos taurus (Bovine) PE=1 SV=1	Uncharacterized protein {ECO:0000313|Ensembl:ENSGGOP00000008334} OS=Gorilla gorilla gorilla (Lowland gorilla) PE=3 SV=1	PREDICTED: acidic mammalian chitinase isoform X1 [Echinops telfairi]
gene19292	[G]	Carbohydrate transport and metabolism	Cellular Component: endoplasmic reticulum (GO:0005783);; Cellular Component: microvillus (GO:0005902);; Cellular Component: basal plasma membrane (GO:0009925);; Molecular Function: water channel activity (GO:0015250);; Biological Process: carbon dioxide transport (GO:0015670);; Cellular Component: integral component of membrane (GO:0016021);; Cellular Component: apical plasma membrane (GO:0016324…	K09867|5.9832e-64|myb:102259935|AQP5; aquaporin 5; K09867 aquaporin-5 (A)	[G]	Carbohydrate transport and metabolism	Aquaporin-5 GN=AQP5 OS=Sus scrofa (Pig) PE=2 SV=1	Aquaporin-5 {ECO:0000313|EMBL:EPQ14611.1} OS=Myotis brandtii (Brandt's bat) PE=3 SV=1	PREDICTED: aquaporin-5 [Myotis lucifugus]
gene9245	[G]	Carbohydrate transport and metabolism	Molecular Function: catalytic activity (GO:0003824);; Cellular Component: mitochondrial inner membrane (GO:0005743);; Biological Process: carbohydrate metabolic process (GO:0005975);; Molecular Function: cation binding (GO:0043169);;	K14210|0|bacu:103008306|SLC3A1; solute carrier family 3 (amino acid transporter heavy chain), member 1; K14210 solute carrier family 3 (neutral and basic amino acid transporter), member 1 (A)	[G]	Carbohydrate transport and metabolism	4F2 cell-surface antigen heavy chain OS=Oryctolagus cuniculus (Rabbit) PE=1 SV=2	Uncharacterized protein {ECO:0000313|Ensembl:ENSMPUP00000011874} OS=Mustela putorius furo (European domestic ferret) PE=4 SV=1	PREDICTED: neutral and basic amino acid transport protein rBAT [Physeter catodon]
gene2454	[G]	Carbohydrate transport and metabolism	Molecular Function: magnesium ion binding (GO:0000287);; Molecular Function: phosphoglucomutase activity (GO:0004614);; Cellular Component: cytosol (GO:0005829);; Biological Process: glycogen biosynthetic process (GO:0005978);; Biological Process: trehalose biosynthetic process (GO:0005992);; Biological Process: glucose metabolic process (GO:0006006);; Cellular Component: actin cytoskeleton (GO:0…	K01835|0|aml:100475139|phosphoglucomutase-1-like; K01835 phosphoglucomutase [EC:5.4.2.2] (A)	[G]	Carbohydrate transport and metabolism	Phosphoglucomutase-1 GN=PGM1 OS=Bos taurus (Bovine) PE=2 SV=1	Uncharacterized protein {ECO:0000313|Ensembl:ENSAMEP00000015887} (Fragment) OS=Ailuropoda melanoleuca (Giant panda) PE=3 SV=1	hypothetical protein PANDA_006098 [Ailuropoda melanoleuca]
gene8758	[G]	Carbohydrate transport and metabolism	Biological Process: skeletal system development (GO:0001501);; Molecular Function: beta-N-acetylhexosaminidase activity (GO:0004563);; Cellular Component: lysosome (GO:0005764);; Biological Process: carbohydrate metabolic process (GO:0005975);; Biological Process: ganglioside catabolic process (GO:0006689);; Biological Process: lysosome organization (GO:0007040);; Biological Process: sensory perc…	K12373|0|lve:103081462|HEXA; hexosaminidase A (alpha polypeptide); K12373 hexosaminidase [EC:3.2.1.52] (A)	[G]	Carbohydrate transport and metabolism	Beta-hexosaminidase subunit alpha (Precursor) GN=HEXA OS=Bos taurus (Bovine) PE=2 SV=1	Beta-hexosaminidase {ECO:0000256|PIRNR:PIRNR001093} OS=Canis familiaris (Dog) PE=3 SV=2	PREDICTED: beta-hexosaminidase subunit alpha, partial [Lipotes vexillifer]
gene2180	[G]	Carbohydrate transport and metabolism	--	--	[G]	Carbohydrate transport and metabolism	--	Uncharacterized protein {ECO:0000313|Ensembl:ENSSSCP00000009160} OS=Sus scrofa (Pig) PE=4 SV=2	PREDICTED: major facilitator superfamily domain-containing protein 2B [Felis catus]
gene25770	[G]	Carbohydrate transport and metabolism	--	K01816|6.13887e-147|ecb:100066491|HYI; hydroxypyruvate isomerase (putative); K01816 hydroxypyruvate isomerase [EC:5.3.1.22] (A)	[G]	Carbohydrate transport and metabolism	--	Uncharacterized protein {ECO:0000313|Ensembl:ENSAMEP00000001611} (Fragment) OS=Ailuropoda melanoleuca (Giant panda) PE=4 SV=1	PREDICTED: putative hydroxypyruvate isomerase [Equus caballus]
gene25847	[G]	Carbohydrate transport and metabolism	--	K00844|0|ecb:100072686|HKDC1; hexokinase domain containing 1; K00844 hexokinase [EC:2.7.1.1] (A)	[G]	Carbohydrate transport and metabolism	Hexokinase-1 GN=HK1 OS=Pongo abelii (Sumatran orangutan) PE=2 SV=1	Uncharacterized protein {ECO:0000313|Ensembl:ENSECAP00000003514} OS=Equus caballus (Horse) PE=3 SV=1	PREDICTED: putative hexokinase HKDC1 [Equus caballus]
gene26784	[G]	Carbohydrate transport and metabolism	Molecular Function: alpha-mannosidase activity (GO:0004559);; Cellular Component: lysosome (GO:0005764);; Biological Process: mannose metabolic process (GO:0006013);; Biological Process: cellular protein modification process (GO:0006464);; Biological Process: learning or memory (GO:0007611);; Molecular Function: zinc ion binding (GO:0008270);; Molecular Function: carbohydrate binding (GO:0030246)…	K12311|0|lve:103088076|MAN2B1; mannosidase, alpha, class 2B, member 1; K12311 lysosomal alpha-mannosidase [EC:3.2.1.24] (A)	[G]	Carbohydrate transport and metabolism	Lysosomal alpha-mannosidase (Precursor) GN=MAN2B1 OS=Felis catus (Cat) PE=2 SV=1	Alpha-mannosidase {ECO:0000256|RuleBase:RU361199} (Fragment) OS=Ailuropoda melanoleuca (Giant panda) PE=3 SV=1	PREDICTED: lysosomal alpha-mannosidase isoform X1 [Lipotes vexillifer]
gene828	[G]	Carbohydrate transport and metabolism	Molecular Function: fructose-bisphosphate aldolase activity (GO:0004332);; Cellular Component: mitochondrion (GO:0005739);; Biological Process: glycolytic process (GO:0006096);; Molecular Function: cytoskeletal protein binding (GO:0008092);; Biological Process: fructose 1,6-bisphosphate metabolic process (GO:0030388);;	K01623|0|ocu:100346653|ALDOC; aldolase C, fructose-bisphosphate; K01623 fructose-bisphosphate aldolase, class I [EC:4.1.2.13] (A)	[G]	Carbohydrate transport and metabolism	Fructose-bisphosphate aldolase C GN=ALDOC OS=Macaca fascicularis (Crab-eating macaque) PE=2 SV=3	Fructose-bisphosphate aldolase {ECO:0000256|RuleBase:RU003994} OS=Oryctolagus cuniculus (Rabbit) PE=3 SV=1	PREDICTED: fructose-bisphosphate aldolase C [Oryctolagus cuniculus]
gene10739	[G]	Carbohydrate transport and metabolism	Molecular Function: magnesium ion binding (GO:0000287);; Molecular Function: phosphoacetylglucosamine mutase activity (GO:0004610);; Molecular Function: phosphoglucomutase activity (GO:0004614);; Biological Process: carbohydrate metabolic process (GO:0005975);; Biological Process: spermatogenesis (GO:0007283);; Biological Process: embryo development (GO:0009790);; Biological Process: glucose 1-ph…	K01836|0|pale:102896159|PGM3; phosphoglucomutase 3; K01836 phosphoacetylglucosamine mutase [EC:5.4.2.3] (A)	[G]	Carbohydrate transport and metabolism	Phosphoacetylglucosamine mutase {ECO:0000303|PubMed:4996162} OS=Sus scrofa (Pig) PE=1 SV=2	Phosphoacetylglucosamine mutase {ECO:0000313|EMBL:ELK00115.1} OS=Pteropus alecto (Black flying fox) PE=3 SV=1	PREDICTED: phosphoacetylglucosamine mutase [Pteropus alecto]
gene13476	[G]	Carbohydrate transport and metabolism	Molecular Function: mannose-6-phosphate isomerase activity (GO:0004476);; Cellular Component: cytoplasm (GO:0005737);; Biological Process: carbohydrate metabolic process (GO:0005975);; Molecular Function: zinc ion binding (GO:0008270);; Biological Process: GDP-mannose biosynthetic process (GO:0009298);;	K01809|0|ecb:100062077|MPI; mannose phosphate isomerase; K01809 mannose-6-phosphate isomerase [EC:5.3.1.8] (A)	[G]	Carbohydrate transport and metabolism	Mannose-6-phosphate isomerase GN=MPI OS=Bos taurus (Bovine) PE=2 SV=3	Mannose-6-phosphate isomerase {ECO:0000256|RuleBase:RU000611} OS=Sus scrofa (Pig) PE=3 SV=1	PREDICTED: mannose-6-phosphate isomerase isoform 1 [Ceratotherium simum simum]
gene8687	[G]	Carbohydrate transport and metabolism	Molecular Function: 1,4-alpha-glucan branching enzyme activity (GO:0003844);; Molecular Function: hydrolase activity, hydrolyzing O-glycosyl compounds (GO:0004553);; Biological Process: glycogen biosynthetic process (GO:0005978);; Molecular Function: cation binding (GO:0043169);;	K00700|0|cfa:478380|GBE1; 1,4-alpha-glucan-branching enzyme-like; K00700 1,4-alpha-glucan branching enzyme [EC:2.4.1.18] (A)	[G]	Carbohydrate transport and metabolism	1,4-alpha-glucan-branching enzyme GN=GBE1 OS=Felis catus (Cat) PE=2 SV=1	Uncharacterized protein {ECO:0000313|Ensembl:ENSCAFP00000011608} OS=Canis familiaris (Dog) PE=4 SV=2	PREDICTED: 1,4-alpha-glucan-branching enzyme [Canis lupus familiaris]
gene23358	[G]	Carbohydrate transport and metabolism	Molecular Function: hydrolase activity, hydrolyzing O-glycosyl compounds (GO:0004553);; Biological Process: carbohydrate metabolic process (GO:0005975);; Biological Process: positive regulation of cell proliferation (GO:0008284);; Molecular Function: fibroblast growth factor binding (GO:0017134);; Biological Process: positive regulation of MAPKKK cascade by fibroblast growth factor receptor signa…	--	[G]	Carbohydrate transport and metabolism	Klotho peptide (Precursor) GN=KL OS=Macaca fascicularis (Crab-eating macaque) PE=2 SV=1	Uncharacterized protein {ECO:0000313|Ensembl:ENSECAP00000020332} OS=Equus caballus (Horse) PE=3 SV=1	PREDICTED: beta-klotho isoform 1 [Ceratotherium simum simum]
gene24470	[G]	Carbohydrate transport and metabolism	Biological Process: regulation of the force of heart contraction (GO:0002026);; Biological Process: diaphragm contraction (GO:0002086);; Cellular Component: lysosomal membrane (GO:0005765);; Biological Process: glycogen catabolic process (GO:0005980);; Biological Process: lysosome organization (GO:0007040);; Biological Process: locomotory behavior (GO:0007626);; Molecular Function: carbohydrate b…	K12316|0|ecb:100056675|GAA; glucosidase, alpha; acid; K12316 lysosomal alpha-glucosidase [EC:3.2.1.20] (A)	[G]	Carbohydrate transport and metabolism	Lysosomal alpha-glucosidase (Precursor) GN=GAA OS=Pongo abelii (Sumatran orangutan) PE=2 SV=1	Uncharacterized protein {ECO:0000313|Ensembl:ENSECAP00000013401} OS=Equus caballus (Horse) PE=3 SV=1	PREDICTED: lysosomal alpha-glucosidase [Ceratotherium simum simum]
gene8761	[G]	Carbohydrate transport and metabolism	Molecular Function: magnesium ion binding (GO:0000287);; Molecular Function: pyruvate kinase activity (GO:0004743);; Molecular Function: ATP binding (GO:0005524);; Cellular Component: nucleus (GO:0005634);; Cellular Component: mitochondrion (GO:0005739);; Cellular Component: plasma membrane (GO:0005886);; Cellular Component: cilium (GO:0005929);; Biological Process: glycolytic process (GO:0006096…	K00873|0|ptr:748700|PKM; pyruvate kinase, muscle; K00873 pyruvate kinase [EC:2.7.1.40] (A)	[G]	Carbohydrate transport and metabolism	Pyruvate kinase PKM GN=PKM OS=Pongo abelii (Sumatran orangutan) PE=2 SV=3	Pyruvate kinase {ECO:0000256|RuleBase:RU000504} (Fragment) OS=Ailuropoda melanoleuca (Giant panda) PE=3 SV=1	PREDICTED: pyruvate kinase isozymes M1/M2 isoform X1 [Mustela putorius furo]
gene1664	[G]	Carbohydrate transport and metabolism	Cellular Component: Golgi membrane (GO:0000139);; Biological Process: in utero embryonic development (GO:0001701);; Biological Process: liver development (GO:0001889);; Molecular Function: alpha-mannosidase activity (GO:0004559);; Biological Process: mannose metabolic process (GO:0006013);; Biological Process: N-glycan processing (GO:0006491);; Biological Process: mitochondrion organization (GO:0…	K01231|0|lve:103076739|MAN2A1; mannosidase, alpha, class 2A, member 1; K01231 alpha-mannosidase II [EC:3.2.1.114] (A)	[G]	Carbohydrate transport and metabolism	Lysosomal alpha-mannosidase (Precursor) GN=MAN2B1 OS=Macaca fascicularis (Crab-eating macaque) PE=2 SV=1	Alpha-mannosidase {ECO:0000256|RuleBase:RU361199} OS=Desmodus rotundus (Vampire bat) PE=2 SV=1	PREDICTED: alpha-mannosidase 2-like [Physeter catodon]
gene13612	[G]	Carbohydrate transport and metabolism	Biological Process: lens development in camera-type eye (GO:0002088);; Molecular Function: structural constituent of eye lens (GO:0005212);; Cellular Component: plasma membrane (GO:0005886);; Cellular Component: gap junction (GO:0005921);; Biological Process: water transport (GO:0006833);; Biological Process: visual perception (GO:0007601);; Molecular Function: water channel activity (GO:0015250)…	K09863|6.11277e-169|pale:102880141|MIP; major intrinsic protein of lens fiber; K09863 aquaporin-0 (A)	[G]	Carbohydrate transport and metabolism	Lens fiber major intrinsic protein GN=MIP OS=Canis familiaris (Dog) PE=2 SV=1	Lens fiber major intrinsic protein {ECO:0000313|Ensembl:ENSCAFP00000000190} (Fragment) OS=Canis familiaris (Dog) PE=4 SV=1	PREDICTED: lens fiber major intrinsic protein [Elephantulus edwardii]
gene14509	[G]	Carbohydrate transport and metabolism	Molecular Function: 6-phosphofructokinase activity (GO:0003872);; Molecular Function: ATP binding (GO:0005524);; Cellular Component: 6-phosphofructokinase complex (GO:0005945);; Biological Process: fructose 6-phosphate metabolic process (GO:0006002);; Biological Process: glycolytic process (GO:0006096);; Biological Process: response to glucose (GO:0009749);; Biological Process: phosphorylation (G…	K00850|0|cfa:487797|PFKL; phosphofructokinase, liver; K00850 6-phosphofructokinase 1 [EC:2.7.1.11] (A)	[G]	Carbohydrate transport and metabolism	ATP-dependent 6-phosphofructokinase, liver type {ECO:0000255|HAMAP-Rule:MF_03184} GN=PFKL OS=Bos taurus (Bovine) PE=2 SV=1	6-phosphofructokinase {ECO:0000256|PIRNR:PIRNR000533} OS=Canis familiaris (Dog) PE=3 SV=2	PREDICTED: 6-phosphofructokinase, liver type [Odobenus rosmarus divergens]
gene24041	[G]	Carbohydrate transport and metabolism	Cellular Component: cytoplasm (GO:0005737);; Biological Process: pentose-phosphate shunt (GO:0006098);; Molecular Function: 6-phosphogluconolactonase activity (GO:0017057);;	K01057|9.70874e-142|cfa:610090|PGLS; 6-phosphogluconolactonase; K01057 6-phosphogluconolactonase [EC:3.1.1.31] (A)	[G]	Carbohydrate transport and metabolism	6-phosphogluconolactonase GN=PGLS OS=Bos taurus (Bovine) PE=2 SV=1	Uncharacterized protein {ECO:0000313|Ensembl:ENSCAFP00000022506} OS=Canis familiaris (Dog) PE=4 SV=1	PREDICTED: 6-phosphogluconolactonase [Canis lupus familiaris]
gene13099	[G]	Carbohydrate transport and metabolism	Molecular Function: chitinase activity (GO:0004568);; Cellular Component: extracellular space (GO:0005615);; Cellular Component: endoplasmic reticulum (GO:0005783);; Biological Process: carbohydrate metabolic process (GO:0005975);; Biological Process: chitin catabolic process (GO:0006032);; Biological Process: inflammatory response (GO:0006954);; Biological Process: activation of NF-kappaB-induci…	K17523|0|ecb:100052556|CHI3L1; chitinase 3-like 1 (cartilage glycoprotein-39); K17523 chitinase-3-like protein 1/2 (A)	[G]	Carbohydrate transport and metabolism	Chitinase-3-like protein 1 (Precursor) GN=CHI3L1 OS=Sus scrofa (Pig) PE=1 SV=2	Uncharacterized protein {ECO:0000313|Ensembl:ENSLAFP00000003327} (Fragment) OS=Loxodonta africana (African elephant) PE=3 SV=1	PREDICTED: chitinase-3-like protein 1 isoform X2 [Equus caballus]
gene8237	[G]	Carbohydrate transport and metabolism	Cellular Component: phosphopyruvate hydratase complex (GO:0000015);; Molecular Function: magnesium ion binding (GO:0000287);; Molecular Function: phosphopyruvate hydratase activity (GO:0004634);; Biological Process: glycolytic process (GO:0006096);;	--	[G]	Carbohydrate transport and metabolism	Alpha-enolase GN=ENO1 OS=Bos taurus (Bovine) PE=1 SV=4	Uncharacterized protein {ECO:0000313|Ensembl:ENSBTAP00000043066} OS=Bos taurus (Bovine) PE=4 SV=1	PREDICTED: enolase-like protein ENO4 isoform X2 [Physeter catodon]
gene11428	[G]	Carbohydrate transport and metabolism	Biological Process: carbohydrate metabolic process (GO:0005975);; Biological Process: N-acetylglucosamine metabolic process (GO:0006044);; Molecular Function: N-acetylglucosamine-6-phosphate deacetylase activity (GO:0008448);; Biological Process: N-acetylneuraminate catabolic process (GO:0019262);; Molecular Function: metal ion binding (GO:0046872);;	K01443|0|bta:521401|AMDHD2; amidohydrolase domain containing 2 (EC:3.5.1.25); K01443 N-acetylglucosamine-6-phosphate deacetylase [EC:3.5.1.25] (A)	[G]	Carbohydrate transport and metabolism	Putative N-acetylglucosamine-6-phosphate deacetylase GN=AMDHD2 OS=Bos taurus (Bovine) PE=2 SV=1	Uncharacterized protein {ECO:0000313|Ensembl:ENSCAFP00000028600} OS=Canis familiaris (Dog) PE=4 SV=2	PREDICTED: putative N-acetylglucosamine-6-phosphate deacetylase isoform 2 [Odobenus rosmarus divergens]
gene7318	[G]	Carbohydrate transport and metabolism	Molecular Function: transporter activity (GO:0005215);; Biological Process: water transport (GO:0006833);; Cellular Component: integral component of membrane (GO:0016021);; Cellular Component: apical part of cell (GO:0045177);; Biological Process: cellular response to cAMP (GO:0071320);;	K09869|4.74498e-125|lve:103070348|AQP8; aquaporin 8; K09869 aquaporin-8 (A)	[G]	Carbohydrate transport and metabolism	Lens fiber major intrinsic protein GN=MIP OS=Bos taurus (Bovine) PE=1 SV=1	Uncharacterized protein {ECO:0000313|Ensembl:ENSECAP00000007437} (Fragment) OS=Equus caballus (Horse) PE=3 SV=1	PREDICTED: aquaporin-8 [Lipotes vexillifer]
gene25556	[G]	Carbohydrate transport and metabolism	Molecular Function: 6-phosphofructokinase activity (GO:0003872);; Molecular Function: ATP binding (GO:0005524);; Cellular Component: 6-phosphofructokinase complex (GO:0005945);; Biological Process: fructose 6-phosphate metabolic process (GO:0006002);; Biological Process: glycolytic process (GO:0006096);; Biological Process: phosphorylation (GO:0016310);;	K00850|1.44242e-135|ecb:100070818|PFKP; phosphofructokinase, platelet; K00850 6-phosphofructokinase 1 [EC:2.7.1.11] (A)	[G]	Carbohydrate transport and metabolism	ATP-dependent 6-phosphofructokinase, platelet type {ECO:0000255|HAMAP-Rule:MF_03184} GN=PFKP OS=Oryctolagus cuniculus (Rabbit) PE=1 SV=1	Uncharacterized protein {ECO:0000313|Ensembl:ENSCAFP00000008228} (Fragment) OS=Canis familiaris (Dog) PE=3 SV=2	PREDICTED: 6-phosphofructokinase type C [Eptesicus fuscus]
gene156	[G]	Carbohydrate transport and metabolism	Cellular Component: Golgi membrane (GO:0000139);; Molecular Function: glucosylceramidase activity (GO:0004348);; Cellular Component: endoplasmic reticulum membrane (GO:0005789);; Biological Process: glucosylceramide catabolic process (GO:0006680);; Molecular Function: beta-glucosidase activity (GO:0008422);; Cellular Component: integral component of membrane (GO:0016021);;	K17108|0|fca:101093307|GBA2; glucosidase, beta (bile acid) 2; K17108 non-lysosomal glucosylceramidase [EC:3.2.1.45] (A)	[G]	Carbohydrate transport and metabolism	--	Uncharacterized protein {ECO:0000313|Ensembl:ENSFCAP00000011823} OS=Felis catus (Cat) PE=4 SV=1	PREDICTED: non-lysosomal glucosylceramidase [Felis catus]
gene7608	[G]	Carbohydrate transport and metabolism	Molecular Function: hydrolase activity, hydrolyzing O-glycosyl compounds (GO:0004553);; Biological Process: carbohydrate metabolic process (GO:0005975);; Cellular Component: membrane (GO:0016020);; Molecular Function: carbohydrate binding (GO:0030246);;	K01203|0|fca:100144605|SI; sucrase-isomaltase (alpha-glucosidase) (EC:3.2.1.10); K01203 sucrase-isomaltase / oligo-1,6-glucosidase [EC:3.2.1.48 3.2.1.10] (A)	[G]	Carbohydrate transport and metabolism	Isomaltase GN=SI OS=Oryctolagus cuniculus (Rabbit) PE=1 SV=3	Sucrase-isomaltase {ECO:0000313|EMBL:BAG16411.1} OS=Felis catus (Cat) PE=2 SV=1	sucrase-isomaltase, intestinal [Felis catus]
gene17751	[G]	Carbohydrate transport and metabolism	Molecular Function: beta-galactosidase activity (GO:0004565);; Cellular Component: lysosome (GO:0005764);; Biological Process: carbohydrate metabolic process (GO:0005975);;	K12309|4.11928e-159|mcf:102143665|beta-galactosidase-like; K12309 beta-galactosidase [EC:3.2.1.23] (A)	[G]	Carbohydrate transport and metabolism	Beta-galactosidase (Precursor) GN=GLB1 OS=Macaca fascicularis (Crab-eating macaque) PE=2 SV=1	Uncharacterized protein {ECO:0000313|Ensembl:ENSPANP00000015208} (Fragment) OS=Papio anubis (Olive baboon) PE=4 SV=1	PREDICTED: beta-galactosidase [Ceratotherium simum simum]
gene8267	[G]	Carbohydrate transport and metabolism	Molecular Function: nucleotide binding (GO:0000166);; Molecular Function: guanyl-nucleotide exchange factor activity (GO:0005085);; Molecular Function: calcium ion binding (GO:0005509);; Cellular Component: intracellular (GO:0005622);; Biological Process: glycogen catabolic process (GO:0005980);; Molecular Function: glycogen phosphorylase activity (GO:0008184);; Molecular Function: pyridoxal phos…	K00688|0|tup:102469711|PYGM; phosphorylase, glycogen, muscle; K00688 starch phosphorylase [EC:2.4.1.1] (A)	[G]	Carbohydrate transport and metabolism	Glycogen phosphorylase, muscle form GN=PYGM OS=Oryctolagus cuniculus (Rabbit) PE=1 SV=3	Alpha-1,4 glucan phosphorylase {ECO:0000256|RuleBase:RU000587} OS=Canis familiaris (Dog) PE=3 SV=2	PREDICTED: glycogen phosphorylase, muscle form [Tupaia chinensis]
gene12248	[G]	Carbohydrate transport and metabolism	Molecular Function: phosphogluconate dehydrogenase (decarboxylating) activity (GO:0004616);; Biological Process: pentose-phosphate shunt, oxidative branch (GO:0009051);; Biological Process: pentose biosynthetic process (GO:0019322);; Molecular Function: NADP binding (GO:0050661);;	K00033|0|hsa:5226|PGD, 6PGD; phosphogluconate dehydrogenase (EC:1.1.1.44); K00033 6-phosphogluconate dehydrogenase [EC:1.1.1.44 1.1.1.343] (A)	[G]	Carbohydrate transport and metabolism	6-phosphogluconate dehydrogenase, decarboxylating GN=PGD OS=Ovis aries (Sheep) PE=1 SV=4	6-phosphogluconate dehydrogenase, decarboxylating {ECO:0000256|PIRNR:PIRNR000109, ECO:0000256|RuleBase:RU000485} OS=Nomascus leucogenys (Northern white-cheeked gibbon) PE=3 SV=1	PREDICTED: 6-phosphogluconate dehydrogenase, decarboxylating [Elephantulus edwardii]
gene10186	[G]	Carbohydrate transport and metabolism	Molecular Function: fructose-bisphosphate aldolase activity (GO:0004332);; Biological Process: fructose metabolic process (GO:0006000);; Biological Process: glycolytic process (GO:0006096);; Biological Process: ATP biosynthetic process (GO:0006754);; Biological Process: striated muscle contraction (GO:0006941);; Molecular Function: cytoskeletal protein binding (GO:0008092);; Biological Process: r…	K01623|0|cjc:100394290|ALDOA; aldolase A, fructose-bisphosphate; K01623 fructose-bisphosphate aldolase, class I [EC:4.1.2.13] (A)	[G]	Carbohydrate transport and metabolism	Fructose-bisphosphate aldolase A GN=ALDOA OS=Pongo abelii (Sumatran orangutan) PE=2 SV=3	Fructose-bisphosphate aldolase {ECO:0000256|RuleBase:RU003994} OS=Gorilla gorilla gorilla (Lowland gorilla) PE=3 SV=1	PREDICTED: fructose-bisphosphate aldolase A isoform X1 [Mustela putorius furo]
gene13573	[G]	Carbohydrate transport and metabolism	Biological Process: cellular glucose homeostasis (GO:0001678);; Molecular Function: glucokinase activity (GO:0004340);; Molecular Function: ATP binding (GO:0005524);; Cellular Component: mitochondrion (GO:0005739);; Cellular Component: cytosol (GO:0005829);; Biological Process: glycolytic process (GO:0006096);; Molecular Function: fructokinase activity (GO:0008865);; Biological Process: phosphory…	K00844|0|ecb:100068725|HK3; hexokinase 3 (white cell); K00844 hexokinase [EC:2.7.1.1] (A)	[G]	Carbohydrate transport and metabolism	Hexokinase-2 GN=HK2 OS=Sus scrofa (Pig) PE=2 SV=1	Uncharacterized protein {ECO:0000313|Ensembl:ENSECAP00000014535} OS=Equus caballus (Horse) PE=3 SV=1	PREDICTED: hexokinase-3 isoform 1 [Ceratotherium simum simum]
gene17249	[G]	Carbohydrate transport and metabolism	Molecular Function: bisphosphoglycerate mutase activity (GO:0004082);; Molecular Function: bisphosphoglycerate 2-phosphatase activity (GO:0004083);; Molecular Function: phosphoglycerate mutase activity (GO:0004619);; Biological Process: glycolytic process (GO:0006096);; Biological Process: striated muscle contraction (GO:0006941);;	K01834|0|mcf:102123026|PGAM2; phosphoglycerate mutase 2 (muscle); K01834 2,3-bisphosphoglycerate-dependent phosphoglycerate mutase [EC:5.4.2.11] (A)	[G]	Carbohydrate transport and metabolism	Phosphoglycerate mutase 2 GN=PGAM2 OS=Bos taurus (Bovine) PE=2 SV=1	Putative uncharacterized protein {ECO:0000313|EMBL:EHH52161.1} OS=Macaca fascicularis (Crab-eating macaque) PE=3 SV=1	PREDICTED: phosphoglycerate mutase 2 isoform 1 [Canis lupus familiaris]
gene10656	[G]	Carbohydrate transport and metabolism	Molecular Function: glyceraldehyde-3-phosphate dehydrogenase (NAD+) (phosphorylating) activity (GO:0004365);; Cellular Component: cytoplasm (GO:0005737);; Biological Process: glycolytic process (GO:0006096);; Biological Process: sperm motility (GO:0030317);; Cellular Component: motile cilium (GO:0031514);; Molecular Function: NADP binding (GO:0050661);; Molecular Function: NAD binding (GO:0051287…	K10705|0|ecb:100051032|GAPDHS; glyceraldehyde-3-phosphate dehydrogenase, spermatogenic; K10705 glyceraldehyde-3-phosphate dehydrogenase, spermatogenic [EC:1.2.1.12] (A)	[G]	Carbohydrate transport and metabolism	Glyceraldehyde-3-phosphate dehydrogenase, testis-specific GN=GAPDHS OS=Bos taurus (Bovine) PE=2 SV=1	Glyceraldehyde-3-phosphate dehydrogenase {ECO:0000256|RuleBase:RU361160} OS=Equus caballus (Horse) PE=3 SV=1	PREDICTED: glyceraldehyde-3-phosphate dehydrogenase, testis-specific [Leptonychotes weddellii]
gene2401	[G]	Carbohydrate transport and metabolism	Biological Process: skeletal system development (GO:0001501);; Cellular Component: acrosomal vesicle (GO:0001669);; Molecular Function: beta-N-acetylhexosaminidase activity (GO:0004563);; Cellular Component: lysosome (GO:0005764);; Biological Process: ganglioside catabolic process (GO:0006689);; Biological Process: cellular calcium ion homeostasis (GO:0006874);; Biological Process: lysosome organ…	K12373|0|cjc:100407865|HEXB; hexosaminidase B (beta polypeptide); K12373 hexosaminidase [EC:3.2.1.52] (A)	[G]	Carbohydrate transport and metabolism	Beta-hexosaminidase subunit beta (Precursor) GN=HEXB OS=Felis catus (Cat) PE=2 SV=2	Putative beta-n-acetylhexosaminidase {ECO:0000313|EMBL:JAA52156.1} (Fragment) OS=Desmodus rotundus (Vampire bat) PE=2 SV=1	PREDICTED: beta-hexosaminidase subunit beta [Ceratotherium simum simum]
gene8414	[G]	Carbohydrate transport and metabolism	Molecular Function: phosphoglycerate kinase activity (GO:0004618);; Molecular Function: ATP binding (GO:0005524);; Cellular Component: cytoplasm (GO:0005737);; Biological Process: glycolytic process (GO:0006096);; Biological Process: phosphorylation (GO:0016310);;	K00927|0|umr:103664016|PGK2; phosphoglycerate kinase 2; K00927 phosphoglycerate kinase [EC:2.7.2.3] (A)	[G]	Carbohydrate transport and metabolism	Phosphoglycerate kinase 2 GN=PGK2 OS=Equus caballus (Horse) PE=3 SV=3	Phosphoglycerate kinase {ECO:0000256|RuleBase:RU000532} (Fragment) OS=Ailuropoda melanoleuca (Giant panda) PE=3 SV=1	PREDICTED: phosphoglycerate kinase 2 [Ursus maritimus]
gene4649	[G]	Carbohydrate transport and metabolism	Molecular Function: glycerone kinase activity (GO:0004371);; Molecular Function: ATP binding (GO:0005524);; Biological Process: glycerol metabolic process (GO:0006071);; Molecular Function: FAD-AMP lyase (cyclizing) activity (GO:0034012);; Molecular Function: metal ion binding (GO:0046872);; Molecular Function: triokinase activity (GO:0050354);;	K00863|0|fca:101081330|DAK; dihydroxyacetone kinase 2 homolog (S. cerevisiae); K00863 dihydroxyacetone kinase [EC:2.7.1.29] (A)	[G]	Carbohydrate transport and metabolism	FAD-AMP lyase (cyclizing) GN=DAK OS=Bos taurus (Bovine) PE=2 SV=1	Uncharacterized protein {ECO:0000313|Ensembl:ENSFCAP00000023142} OS=Felis catus (Cat) PE=4 SV=1	PREDICTED: bifunctional ATP-dependent dihydroxyacetone kinase/FAD-AMP lyase (cyclizing) isoform X2 [Felis catus]
gene18722	[G]	Carbohydrate transport and metabolism	Molecular Function: galactokinase activity (GO:0004335);; Molecular Function: ATP binding (GO:0005524);; Cellular Component: cytoplasm (GO:0005737);; Biological Process: galactose metabolic process (GO:0006012);; Biological Process: carbohydrate phosphorylation (GO:0046835);;	K18674|0|pale:102887362|GALK2; galactokinase 2; K18674 N-acetylgalactosamine kinase [EC:2.7.1.157] (A)	[G]	Carbohydrate transport and metabolism	N-acetylgalactosamine kinase GN=GALK2 OS=Pongo abelii (Sumatran orangutan) PE=2 SV=1	Uncharacterized protein {ECO:0000313|Ensembl:ENSCAFP00000021956} OS=Canis familiaris (Dog) PE=3 SV=1	PREDICTED: N-acetylgalactosamine kinase isoform X1 [Pteropus alecto]
gene2108	[G]	Carbohydrate transport and metabolism	--	K01194|2.21961e-98|ecb:100071276|TREH; trehalase (brush-border membrane glycoprotein); K01194 alpha,alpha-trehalase [EC:3.2.1.28] (A)	[G]	Carbohydrate transport and metabolism	Trehalase (Precursor) GN=TREH OS=Oryctolagus cuniculus (Rabbit) PE=1 SV=1	Trehalase {ECO:0000256|RuleBase:RU361180} OS=Equus caballus (Horse) PE=3 SV=1	PREDICTED: trehalase isoform X2 [Monodelphis domestica]
gene593	[G]	Carbohydrate transport and metabolism	Molecular Function: transporter activity (GO:0005215);; Biological Process: water transport (GO:0006833);; Biological Process: response to toxic substance (GO:0009636);; Cellular Component: integral component of membrane (GO:0016021);;	K09878|0|umr:103668398|AQP10; aquaporin 10; K09878 aquaporin-10 (A)	[G]	Carbohydrate transport and metabolism	Aquaporin-3 GN=AQP3 OS=Bos taurus (Bovine) PE=2 SV=1	Uncharacterized protein {ECO:0000313|Ensembl:ENSAMEP00000012346} (Fragment) OS=Ailuropoda melanoleuca (Giant panda) PE=3 SV=1	PREDICTED: aquaporin-10 [Ursus maritimus]
gene2485	[G]	Carbohydrate transport and metabolism	Biological Process: cellular glucose homeostasis (GO:0001678);; Molecular Function: glucokinase activity (GO:0004340);; Molecular Function: ATP binding (GO:0005524);; Cellular Component: mitochondrial outer membrane (GO:0005741);; Cellular Component: cytosol (GO:0005829);; Biological Process: glycolytic process (GO:0006096);; Biological Process: apoptotic mitochondrial changes (GO:0008637);; Mole…	K00844|0|mcf:102121518|HK2; hexokinase 2; K00844 hexokinase [EC:2.7.1.1] (A)	[G]	Carbohydrate transport and metabolism	Hexokinase-2 GN=HK2 OS=Sus scrofa (Pig) PE=2 SV=1	Uncharacterized protein {ECO:0000313|Ensembl:ENSFCAP00000005556} OS=Felis catus (Cat) PE=3 SV=1	PREDICTED: hexokinase-2 [Panthera tigris altaica]
gene1044	[G]	Carbohydrate transport and metabolism	Molecular Function: bisphosphoglycerate mutase activity (GO:0004082);; Molecular Function: bisphosphoglycerate 2-phosphatase activity (GO:0004083);; Molecular Function: phosphoglycerate mutase activity (GO:0004619);; Biological Process: glycolytic process (GO:0006096);;	K01834|4.89331e-179|ssc:100154776|PGAM1; phosphoglycerate mutase 1 (brain); K01834 2,3-bisphosphoglycerate-dependent phosphoglycerate mutase [EC:5.4.2.11] (A)	[G]	Carbohydrate transport and metabolism	Phosphoglycerate mutase 1 GN=PGAM1 OS=Bos taurus (Bovine) PE=2 SV=3	Putative phosphoglycerate mutase {ECO:0000313|EMBL:JAA51064.1} (Fragment) OS=Desmodus rotundus (Vampire bat) PE=2 SV=1	PREDICTED: phosphoglycerate mutase 1 [Eptesicus fuscus]
gene8380	[G]	Carbohydrate transport and metabolism	Molecular Function: bisphosphoglycerate mutase activity (GO:0004082);; Molecular Function: bisphosphoglycerate 2-phosphatase activity (GO:0004083);; Molecular Function: phosphoglycerate mutase activity (GO:0004619);; Biological Process: glycolytic process (GO:0006096);;	K01837|6.34377e-179|bacu:103009787|BPGM; 2,3-bisphosphoglycerate mutase; K01837 bisphosphoglycerate mutase [EC:5.4.2.4 5.4.2.11 3.1.3.13] (A)	[G]	Carbohydrate transport and metabolism	Bisphosphoglycerate mutase GN=BPGM OS=Oryctolagus cuniculus (Rabbit) PE=2 SV=2	Putative phosphoglycerate mutase {ECO:0000313|EMBL:JAA51113.1} (Fragment) OS=Desmodus rotundus (Vampire bat) PE=2 SV=1	PREDICTED: bisphosphoglycerate mutase [Balaenoptera acutorostrata scammoni]
gene17342	[G]	Carbohydrate transport and metabolism	Molecular Function: ribokinase activity (GO:0004747);; Biological Process: D-ribose metabolic process (GO:0006014);; Biological Process: phosphorylation (GO:0016310);;	K00852|0|ptg:102949133|RBKS; ribokinase; K00852 ribokinase [EC:2.7.1.15] (A)	[G]	Carbohydrate transport and metabolism	--	Uncharacterized protein {ECO:0000313|Ensembl:ENSFCAP00000003045} OS=Felis catus (Cat) PE=3 SV=1	PREDICTED: ribokinase isoform X1 [Panthera tigris altaica]

## Sheet: Lipid
#GeneID	COG_class	COG_class_annotation	GO_annotation	KEGG_annotation	KOG_class	KOG_class_annotation	Swissprot_annotation	TrEMBL_annotation	nr_annotation
gene14413	[I]	Lipid transport and metabolism	Molecular Function: 1-acylglycerol-3-phosphate O-acyltransferase activity (GO:0003841);; Cellular Component: integral component of membrane (GO:0016021);; Biological Process: CDP-diacylglycerol biosynthetic process (GO:0016024);;	K13523|0|ecb:100050454|AGPAT4; 1-acylglycerol-3-phosphate O-acyltransferase 4; K13523 lysophosphatidic acid acyltransferase / lysophosphatidylinositol acyltransferase [EC:2.3.1.51 2.3.1.-] (A)	[I]	Lipid transport and metabolism	1-acyl-sn-glycerol-3-phosphate acyltransferase delta GN=AGPAT4 OS=Bos taurus (Bovine) PE=2 SV=1	Uncharacterized protein {ECO:0000313|Ensembl:ENSECAP00000001925} OS=Equus caballus (Horse) PE=4 SV=1	PREDICTED: 1-acyl-sn-glycerol-3-phosphate acyltransferase delta [Ceratotherium simum simum]
gene2703	[I]	Lipid transport and metabolism	Cellular Component: endoplasmic reticulum membrane (GO:0005789);; Molecular Function: transferase activity, transferring alkyl or aryl (other than methyl) groups (GO:0016765);; Biological Process: intracellular cholesterol transport (GO:0032367);; Biological Process: sterol homeostasis (GO:0055092);;	--	[I]	Lipid transport and metabolism	--	Uncharacterized protein {ECO:0000313|Ensembl:ENSECAP00000008715} OS=Equus caballus (Horse) PE=4 SV=1	PREDICTED: nogo-B receptor, partial [Capra hircus]
gene17328	[I]	Lipid transport and metabolism	Molecular Function: acetate-CoA ligase activity (GO:0003987);; Cellular Component: nucleus (GO:0005634);; Cellular Component: cytoplasm (GO:0005737);; Biological Process: acetyl-CoA biosynthetic process (GO:0006085);; Biological Process: lipid biosynthetic process (GO:0008610);;	K01895|5.01693e-74|pale:102878259|ACSS2; acyl-CoA synthetase short-chain family member 2; K01895 acetyl-CoA synthetase [EC:6.2.1.1] (A)	[I]	Lipid transport and metabolism	Acyl-CoA synthetase short-chain family member 3, mitochondrial (Precursor) GN=ACSS3 OS=Pongo abelii (Sumatran orangutan) PE=2 SV=1	Uncharacterized protein {ECO:0000313|Ensembl:ENSMMUP00000037756} OS=Macaca mulatta (Rhesus macaque) PE=4 SV=1	Acetyl-coenzyme A synthetase, cytoplasmic [Myotis brandtii]
gene7618	[I]	Lipid transport and metabolism	Cellular Component: endoplasmic reticulum (GO:0005783);; Biological Process: sphinganine-1-phosphate metabolic process (GO:0006668);; Biological Process: sphingosine metabolic process (GO:0006670);; Biological Process: apoptotic process (GO:0006915);; Cellular Component: membrane (GO:0016020);; Molecular Function: sphingosine-1-phosphate phosphatase activity (GO:0042392);;	K04716|0|lve:103069005|SGPP1; sphingosine-1-phosphate phosphatase 1; K04716 sphingosine-1-phosphate phosphatase 1 [EC:3.1.3.-] (A)	[I]	Lipid transport and metabolism	--	Uncharacterized protein {ECO:0000313|Ensembl:ENSMPUP00000006565} OS=Mustela putorius furo (European domestic ferret) PE=4 SV=1	PREDICTED: sphingosine-1-phosphate phosphatase 1 [Leptonychotes weddellii]
gene19144	[I]	Lipid transport and metabolism	Molecular Function: hydroxymethylglutaryl-CoA reductase (NADPH) activity (GO:0004420);; Cellular Component: peroxisomal membrane (GO:0005778);; Cellular Component: endoplasmic reticulum membrane (GO:0005789);; Biological Process: cholesterol biosynthetic process (GO:0006695);; Biological Process: isoprenoid biosynthetic process (GO:0008299);; Biological Process: visual learning (GO:0008542);; Bio…	K00021|0|myb:102262745|HMGCR; 3-hydroxy-3-methylglutaryl-CoA reductase; K00021 hydroxymethylglutaryl-CoA reductase (NADPH) [EC:1.1.1.34] (A)	[I]	Lipid transport and metabolism	3-hydroxy-3-methylglutaryl-coenzyme A reductase GN=HMGCR OS=Bos taurus (Bovine) PE=2 SV=2	3-hydroxy-3-methylglutaryl coenzyme A reductase {ECO:0000256|RuleBase:RU361219} OS=Myotis brandtii (Brandt's bat) PE=3 SV=1	PREDICTED: 3-hydroxy-3-methylglutaryl-coenzyme A reductase isoform X1 [Vicugna pacos]
gene22268	[I]	Lipid transport and metabolism	Biological Process: long-chain fatty acid metabolic process (GO:0001676);; Cellular Component: mitochondrion (GO:0005739);; Cellular Component: lipid particle (GO:0005811);; Biological Process: lipid biosynthetic process (GO:0008610);; Biological Process: positive regulation of cell growth (GO:0030307);; Molecular Function: very long-chain fatty acid-CoA ligase activity (GO:0031957);; Biological …	K01897|0|nle:100590161|ACSL4; acyl-CoA synthetase long-chain family member 4; K01897 long-chain acyl-CoA synthetase [EC:6.2.1.3] (A)	[I]	Lipid transport and metabolism	Long-chain-fatty-acid--CoA ligase 3 GN=ACSL3 OS=Pongo abelii (Sumatran orangutan) PE=2 SV=2	Uncharacterized protein {ECO:0000313|Ensembl:ENSGGOP00000008424} (Fragment) OS=Gorilla gorilla gorilla (Lowland gorilla) PE=4 SV=1	PREDICTED: long-chain-fatty-acid--CoA ligase 4 isoform 1 [Ceratotherium simum simum]
gene24151	[I]	Lipid transport and metabolism	--	--	[I]	Lipid transport and metabolism	Acyl-coenzyme A synthetase ACSM1, mitochondrial (Precursor) GN=ACSM1 OS=Bos taurus (Bovine) PE=1 SV=2	Uncharacterized protein {ECO:0000313|Ensembl:ENSOARP00000013585} OS=Ovis aries (Sheep) PE=4 SV=1	PREDICTED: LOW QUALITY PROTEIN: acyl-coenzyme A synthetase ACSM5, mitochondrial [Echinops telfairi]
gene15398	[I]	Lipid transport and metabolism	Molecular Function: catalytic activity (GO:0003824);; Cellular Component: endosome (GO:0005768);; Cellular Component: Golgi apparatus (GO:0005794);; Biological Process: cell communication (GO:0007154);; Biological Process: metabolic process (GO:0008152);; Molecular Function: phosphatidylinositol binding (GO:0035091);; Biological Process: defense response to Gram-positive bacterium (GO:0050830);;	K01115|0|ssc:100519446|PLD1; phospholipase D1, phosphatidylcholine-specific (EC:3.1.4.4); K01115 phospholipase D1/2 [EC:3.1.4.4] (A)	[I]	Lipid transport and metabolism	Phospholipase D2 GN=PLD2 OS=Bos taurus (Bovine) PE=2 SV=1	Uncharacterized protein {ECO:0000313|Ensembl:ENSSSCP00000012521} OS=Sus scrofa (Pig) PE=4 SV=2	phospholipase D1 [Sus scrofa]
gene19002	[I]	Lipid transport and metabolism	Molecular Function: catalytic activity (GO:0003824);; Biological Process: metabolic process (GO:0008152);;	K01897|0|cjc:100415518|ACSL5; acyl-CoA synthetase long-chain family member 5; K01897 long-chain acyl-CoA synthetase [EC:6.2.1.3] (A)	[I]	Lipid transport and metabolism	Long-chain-fatty-acid--CoA ligase 3 GN=ACSL3 OS=Pongo abelii (Sumatran orangutan) PE=2 SV=2	Uncharacterized protein {ECO:0000313|Ensembl:ENSCJAP00000035209} OS=Callithrix jacchus (White-tufted-ear marmoset) PE=4 SV=1	PREDICTED: long-chain-fatty-acid--CoA ligase 5 isoform X1 [Mustela putorius furo]
gene16694	[I]	Lipid transport and metabolism	Molecular Function: catalytic activity (GO:0003824);; Molecular Function: receptor binding (GO:0005102);; Cellular Component: mitochondrion (GO:0005739);; Biological Process: metabolic process (GO:0008152);;	K12663|1.03859e-121|myd:102770725|ECH1; enoyl CoA hydratase 1, peroxisomal; K12663 delta(3,5)-Delta(2,4)-dienoyl-CoA isomerase [EC:5.3.3.-] (A)	[I]	Lipid transport and metabolism	Delta(3,5)-Delta(2,4)-dienoyl-CoA isomerase, mitochondrial (Precursor) GN=ECH1 OS=Pongo abelii (Sumatran orangutan) PE=2 SV=1	Uncharacterized protein {ECO:0000313|Ensembl:ENSMLUP00000000869} OS=Myotis lucifugus (Little brown bat) PE=3 SV=1	PREDICTED: delta(3,5)-Delta(2,4)-dienoyl-CoA isomerase, mitochondrial [Ceratotherium simum simum]
gene6280	[I]	Lipid transport and metabolism	--	K18426|2.48332e-78|bacu:103017976|ECHDC1; enoyl CoA hydratase domain containing 1; K18426 ethylmalonyl-CoA/methylmalonyl-CoA decarboxylase [EC:4.1.1.94 4.1.1.41] (A)	[I]	Lipid transport and metabolism	Ethylmalonyl-CoA decarboxylase GN=ECHDC1 OS=Bos taurus (Bovine) PE=2 SV=1	Enoyl-CoA hydratase domain-containing 1-like protein {ECO:0000313|EMBL:AEB61234.1} (Fragment) OS=Equus caballus (Horse) PE=2 SV=1	PREDICTED: ethylmalonyl-CoA decarboxylase isoform X5 [Physeter catodon]
gene16657	[I]	Lipid transport and metabolism	Molecular Function: 3-hydroxyacyl-CoA dehydrogenase activity (GO:0003857);; Cellular Component: mitochondrial inner membrane (GO:0005743);; Cellular Component: mitochondrial matrix (GO:0005759);; Biological Process: fatty acid beta-oxidation (GO:0006635);; Molecular Function: NAD+ binding (GO:0070403);;	K00022|3.6683e-180|ssc:397604|HADH, HAD, HADHSC; hydroxyacyl-CoA dehydrogenase (EC:1.1.1.35); K00022 3-hydroxyacyl-CoA dehydrogenase [EC:1.1.1.35] (A)	[I]	Lipid transport and metabolism	Hydroxyacyl-coenzyme A dehydrogenase, mitochondrial (Precursor) GN=HADH OS=Sus scrofa (Pig) PE=1 SV=2	Uncharacterized protein {ECO:0000313|Ensembl:ENSNLEP00000015739} OS=Nomascus leucogenys (Northern white-cheeked gibbon) PE=4 SV=1	PREDICTED: hydroxyacyl-coenzyme A dehydrogenase, mitochondrial [Vicugna pacos]
gene956	[I]	Lipid transport and metabolism	--	K05607|2.31175e-110|bacu:103014252|AUH; AU RNA binding protein/enoyl-CoA hydratase; K05607 methylglutaconyl-CoA hydratase [EC:4.2.1.18] (A)	[I]	Lipid transport and metabolism	Enoyl-CoA hydratase domain-containing protein 2, mitochondrial (Precursor) GN=ECHDC2 OS=Bos taurus (Bovine) PE=2 SV=1	Uncharacterized protein {ECO:0000313|Ensembl:ENSCAFP00000039843} OS=Canis familiaris (Dog) PE=3 SV=1	PREDICTED: methylglutaconyl-CoA hydratase, mitochondrial isoform X1 [Balaenoptera acutorostrata scammoni]
gene17593	[I]	Lipid transport and metabolism	Cellular Component: cytosol (GO:0005829);; Biological Process: fatty acid catabolic process (GO:0009062);; Molecular Function: palmitoyl-CoA hydrolase activity (GO:0016290);; Cellular Component: neuron projection (GO:0043005);; Cellular Component: cell body (GO:0044297);;	K17360|9.65509e-57|fca:101090371|ACOT7; acyl-CoA thioesterase 7; K17360 acyl-coenzyme A thioesterase 7 [EC:3.1.2.2] (A)	[I]	Lipid transport and metabolism	--	Uncharacterized protein {ECO:0000313|Ensembl:ENSNLEP00000012651} OS=Nomascus leucogenys (Northern white-cheeked gibbon) PE=4 SV=2	PREDICTED: cytosolic acyl coenzyme A thioester hydrolase-like, partial [Leptonychotes weddellii]
gene12550	[I]	Lipid transport and metabolism	Molecular Function: catalytic activity (GO:0003824);; Cellular Component: mitochondrion (GO:0005739);; Biological Process: metabolic process (GO:0008152);;	K01896|0|ecb:100068752|ACSM4; acyl-CoA synthetase medium-chain family member 4; K01896 medium-chain acyl-CoA synthetase [EC:6.2.1.2] (A)	[I]	Lipid transport and metabolism	Acyl-coenzyme A synthetase ACSM3, mitochondrial (Precursor) GN=ACSM3 OS=Pongo abelii (Sumatran orangutan) PE=2 SV=1	Uncharacterized protein {ECO:0000313|Ensembl:ENSECAP00000019064} OS=Equus caballus (Horse) PE=4 SV=1	PREDICTED: acyl-coenzyme A synthetase ACSM4, mitochondrial [Equus caballus]
gene17141	[I]	Lipid transport and metabolism	Molecular Function: catalytic activity (GO:0003824);; Cellular Component: endosome (GO:0005768);; Cellular Component: Golgi apparatus (GO:0005794);; Biological Process: cell communication (GO:0007154);; Biological Process: metabolic process (GO:0008152);; Molecular Function: phosphatidylinositol binding (GO:0035091);; Biological Process: defense response to Gram-positive bacterium (GO:0050830);;	K01115|1.43034e-104|phd:102331547|phospholipase D1-like; K01115 phospholipase D1/2 [EC:3.1.4.4] (A)	[I]	Lipid transport and metabolism	Phospholipase D2 GN=PLD2 OS=Bos taurus (Bovine) PE=2 SV=1	Phospholipase D1 {ECO:0000313|EMBL:BAK63129.1} OS=Pan troglodytes (Chimpanzee) PE=2 SV=1	PREDICTED: phospholipase D1-like [Pantholops hodgsonii]
gene3980	[I]	Lipid transport and metabolism	--	K08764|3.96005e-79|lve:103084299|non-specific lipid-transfer protein-like; K08764 sterol carrier protein 2 [EC:2.3.1.176] (A)	[I]	Lipid transport and metabolism	Non-specific lipid-transfer protein GN=SCP2 OS=Oryctolagus cuniculus (Rabbit) PE=1 SV=1	Non-specific lipid-transfer protein-like protein {ECO:0000313|EMBL:AEP99069.1} (Fragment) OS=Equus caballus (Horse) PE=2 SV=1	PREDICTED: non-specific lipid-transfer protein-like [Lipotes vexillifer]
gene14305	[I]	Lipid transport and metabolism	Molecular Function: fatty-acyl-CoA binding (GO:0000062);; Cellular Component: endoplasmic reticulum membrane (GO:0005789);; Cellular Component: brush border (GO:0005903);; Biological Process: cholesterol metabolic process (GO:0008203);; Molecular Function: cholesterol binding (GO:0015485);; Cellular Component: integral component of membrane (GO:0016021);; Biological Process: cholesterol efflux (G…	K00637|0|bacu:103005265|SOAT2; sterol O-acyltransferase 2; K00637 sterol O-acyltransferase [EC:2.3.1.26] (A)	[I]	Lipid transport and metabolism	Sterol O-acyltransferase 2 GN=SOAT2 OS=Chlorocebus aethiops (Green monkey) PE=2 SV=1	O-acyltransferase {ECO:0000256|PIRNR:PIRNR000439} OS=Sus scrofa (Pig) PE=3 SV=2	PREDICTED: sterol O-acyltransferase 2 isoform X1 [Balaenoptera acutorostrata scammoni]
gene11977	[I]	Lipid transport and metabolism	Molecular Function: catalytic activity (GO:0003824);; Biological Process: metabolic process (GO:0008152);; Cellular Component: membrane (GO:0016020);;	--	[I]	Lipid transport and metabolism	Lipid phosphate phosphatase-related protein type 2 GN=LPPR2 OS=Bos taurus (Bovine) PE=2 SV=1	Uncharacterized protein {ECO:0000313|Ensembl:ENSOGAP00000002477} OS=Otolemur garnettii (Small-eared galago) PE=4 SV=1	PREDICTED: lipid phosphate phosphatase-related protein type 5-like isoform 1 [Odobenus rosmarus divergens]
gene19922	[I]	Lipid transport and metabolism	Molecular Function: stearoyl-CoA 9-desaturase activity (GO:0004768);; Molecular Function: iron ion binding (GO:0005506);; Cellular Component: endoplasmic reticulum membrane (GO:0005789);; Biological Process: fatty acid biosynthetic process (GO:0006633);; Cellular Component: integral component of membrane (GO:0016021);; Biological Process: oxidation-reduction process (GO:0055114);;	K00507|2.91151e-75|myd:102758244|SCD5; stearoyl-CoA desaturase 5; K00507 stearoyl-CoA desaturase (delta-9 desaturase) [EC:1.14.19.1] (A)	[I]	Lipid transport and metabolism	Stearoyl-CoA desaturase 5 GN=SCD5 OS=Bos taurus (Bovine) PE=2 SV=1	Uncharacterized protein {ECO:0000313|Ensembl:ENSECAP00000012496} (Fragment) OS=Equus caballus (Horse) PE=3 SV=1	PREDICTED: stearoyl-CoA desaturase 5-like, partial [Tursiops truncatus]
gene11812	[I]	Lipid transport and metabolism	Molecular Function: acyl-CoA ligase activity (GO:0003996);; Molecular Function: ATP binding (GO:0005524);; Molecular Function: GTP binding (GO:0005525);; Cellular Component: mitochondrial matrix (GO:0005759);; Biological Process: fatty acid biosynthetic process (GO:0006633);; Molecular Function: fatty acid ligase activity (GO:0015645);; Molecular Function: metal ion binding (GO:0046872);; Molecul…	K01896|0|fca:101083474|acyl-coenzyme A synthetase ACSM1, mitochondrial-like; K01896 medium-chain acyl-CoA synthetase [EC:6.2.1.2] (A)	[I]	Lipid transport and metabolism	Acyl-coenzyme A synthetase ACSM1, mitochondrial (Precursor) GN=ACSM1 OS=Bos taurus (Bovine) PE=1 SV=2	Uncharacterized protein {ECO:0000313|Ensembl:ENSFCAP00000007515} OS=Felis catus (Cat) PE=4 SV=1	PREDICTED: acyl-coenzyme A synthetase ACSM1, mitochondrial-like [Felis catus]
gene12152	[I]	Lipid transport and metabolism	Molecular Function: calcium ion binding (GO:0005509);; Cellular Component: endoplasmic reticulum (GO:0005783);; Cellular Component: Golgi apparatus (GO:0005794);; Biological Process: surfactant homeostasis (GO:0043129);; Biological Process: positive regulation of protein catabolic process (GO:0045732);; Molecular Function: 1-acylglycerophosphocholine O-acyltransferase activity (GO:0047184);; Biol…	K13510|0|mcf:102143549|LPCAT1; lysophosphatidylcholine acyltransferase 1; K13510 lysophosphatidylcholine acyltransferase / lyso-PAF acetyltransferase [EC:2.3.1.23 2.3.1.67] (A)	[I]	Lipid transport and metabolism	Glycerol-3-phosphate acyltransferase 4 (Precursor) GN=AGPAT6 OS=Bos taurus (Bovine) PE=3 SV=1	Uncharacterized protein {ECO:0000313|Ensembl:ENSPANP00000001561} OS=Papio anubis (Olive baboon) PE=4 SV=1	PREDICTED: lysophosphatidylcholine acyltransferase 1 [Ceratotherium simum simum]
gene18999	[I]	Lipid transport and metabolism	Molecular Function: glycerol-3-phosphate O-acyltransferase activity (GO:0004366);; Cellular Component: mitochondrial inner membrane (GO:0005743);; Biological Process: fatty acid metabolic process (GO:0006631);; Biological Process: acyl-CoA metabolic process (GO:0006637);; Biological Process: glycerophospholipid metabolic process (GO:0006650);; Biological Process: phospholipid biosynthetic process…	K00629|0|ptg:102964153|GPAM; glycerol-3-phosphate acyltransferase, mitochondrial; K00629 glycerol-3-phosphate O-acyltransferase 1/2 [EC:2.3.1.15] (A)	[I]	Lipid transport and metabolism	Glycerol-3-phosphate acyltransferase 1, mitochondrial (Precursor) GN=GPAM OS=Bos taurus (Bovine) PE=2 SV=1	Uncharacterized protein {ECO:0000313|Ensembl:ENSOGAP00000007179} (Fragment) OS=Otolemur garnettii (Small-eared galago) PE=4 SV=1	PREDICTED: glycerol-3-phosphate acyltransferase 1, mitochondrial isoform 1 [Odobenus rosmarus divergens]
gene17879	[I]	Lipid transport and metabolism	Molecular Function: acyl-CoA dehydrogenase activity (GO:0003995);; Cellular Component: nucleus (GO:0005634);; Cellular Component: mitochondrion (GO:0005739);; Cellular Component: dendrite (GO:0030425);; Molecular Function: flavin adenine dinucleotide binding (GO:0050660);; Biological Process: oxidation-reduction process (GO:0055114);;	K15980|0|myb:102245314|acyl-CoA dehydrogenase family member 9, mitochondrial-like; K15980 acyl-CoA dehydrogenase family member 9 [EC:1.3.99.-] (A)	[I]	Lipid transport and metabolism	Very long-chain specific acyl-CoA dehydrogenase, mitochondrial (Precursor) GN=ACADVL OS=Bos taurus (Bovine) PE=2 SV=3	Uncharacterized protein {ECO:0000313|Ensembl:ENSMPUP00000017178} OS=Mustela putorius furo (European domestic ferret) PE=3 SV=1	PREDICTED: acyl-CoA dehydrogenase family member 9, mitochondrial [Mustela putorius furo]
gene10104	[I]	Lipid transport and metabolism	Molecular Function: phosphatidate cytidylyltransferase activity (GO:0004605);; Cellular Component: mitochondrial inner membrane (GO:0005743);; Cellular Component: endoplasmic reticulum (GO:0005783);; Cellular Component: integral component of membrane (GO:0016021);; Biological Process: CDP-diacylglycerol biosynthetic process (GO:0016024);;	K00981|0|pps:100990066|CDS2; CDP-diacylglycerol synthase (phosphatidate cytidylyltransferase) 2; K00981 phosphatidate cytidylyltransferase [EC:2.7.7.41] (A)	[I]	Lipid transport and metabolism	Phosphatidate cytidylyltransferase 2 GN=CDS2 OS=Bos taurus (Bovine) PE=1 SV=1	Uncharacterized protein {ECO:0000313|Ensembl:ENSPANP00000017018} OS=Papio anubis (Olive baboon) PE=4 SV=1	PREDICTED: phosphatidate cytidylyltransferase 2 [Trichechus manatus latirostris]
gene12517	[I]	Lipid transport and metabolism	Biological Process: very long-chain fatty acid metabolic process (GO:0000038);; Cellular Component: peroxisome (GO:0005777);; Biological Process: fatty acid beta-oxidation (GO:0006635);; Biological Process: bile acid metabolic process (GO:0008206);; Molecular Function: palmitoyl-CoA oxidase activity (GO:0016401);; Molecular Function: transferase activity, transferring acyl groups other than amino…	K07513|0|ecb:100050082|ACAA1; acetyl-CoA acyltransferase 1; K07513 acetyl-CoA acyltransferase 1 [EC:2.3.1.16] (A)	[I]	Lipid transport and metabolism	3-ketoacyl-CoA thiolase, mitochondrial GN=ACAA2 OS=Bos taurus (Bovine) PE=2 SV=1	Uncharacterized protein {ECO:0000313|Ensembl:ENSECAP00000006933} OS=Equus caballus (Horse) PE=3 SV=1	PREDICTED: 3-ketoacyl-CoA thiolase, peroxisomal isoform X1 [Mustela putorius furo]
gene26734	[I]	Lipid transport and metabolism	Molecular Function: iron ion binding (GO:0005506);; Biological Process: fatty acid biosynthetic process (GO:0006633);; Cellular Component: integral component of membrane (GO:0016021);; Molecular Function: oxidoreductase activity (GO:0016491);; Biological Process: oxidation-reduction process (GO:0055114);;	K00227|1.86657e-88|ptg:102956406|SC5D; sterol-C5-desaturase; K00227 lathosterol oxidase [EC:1.14.21.6] (A)	[I]	Lipid transport and metabolism	--	Uncharacterized protein {ECO:0000313|Ensembl:ENSFCAP00000021270} OS=Felis catus (Cat) PE=4 SV=1	PREDICTED: lathosterol oxidase [Panthera tigris altaica]
gene18109	[I]	Lipid transport and metabolism	Biological Process: positive regulation of cytokine production (GO:0001819);; Molecular Function: 1-acylglycerol-3-phosphate O-acyltransferase activity (GO:0003841);; Cellular Component: endoplasmic reticulum (GO:0005783);; Biological Process: phospholipid biosynthetic process (GO:0008654);; Cellular Component: membrane (GO:0016020);;	K13509|3.32437e-142|fca:101094635|AGPAT2; 1-acylglycerol-3-phosphate O-acyltransferase 2; K13509 lysophosphatidate acyltransferase [EC:2.3.1.51] (A)	[I]	Lipid transport and metabolism	1-acyl-sn-glycerol-3-phosphate acyltransferase alpha (Precursor) GN=AGPAT1 OS=Bos taurus (Bovine) PE=2 SV=1	Uncharacterized protein {ECO:0000313|Ensembl:ENSFCAP00000010774} (Fragment) OS=Felis catus (Cat) PE=4 SV=1	PREDICTED: 1-acyl-sn-glycerol-3-phosphate acyltransferase beta isoform 2 [Ceratotherium simum simum]
gene20276	[I]	Lipid transport and metabolism	Molecular Function: lanosterol synthase activity (GO:0000250);; Cellular Component: endoplasmic reticulum membrane (GO:0005789);; Cellular Component: lipid particle (GO:0005811);; Biological Process: steroid biosynthetic process (GO:0006694);;	K01852|0|mcf:102137329|LSS; lanosterol synthase (2,3-oxidosqualene-lanosterol cyclase); K01852 lanosterol synthase [EC:5.4.99.7] (A)	[I]	Lipid transport and metabolism	Lanosterol synthase GN=LSS OS=Bos taurus (Bovine) PE=1 SV=2	Uncharacterized protein {ECO:0000313|Ensembl:ENSMMUP00000029398} OS=Macaca mulatta (Rhesus macaque) PE=4 SV=1	PREDICTED: lanosterol synthase isoform 1 [Orcinus orca]
gene16991	[I]	Lipid transport and metabolism	Molecular Function: 3-hydroxyacyl-CoA dehydrogenase activity (GO:0003857);; Biological Process: fatty acid metabolic process (GO:0006631);; Biological Process: oxidation-reduction process (GO:0055114);; Molecular Function: NAD+ binding (GO:0070403);;	K13247|0|umr:103664279|CRYL1; crystallin, lambda 1; K13247 L-gulonate 3-dehydrogenase [EC:1.1.1.45] (A)	[I]	Lipid transport and metabolism	Lambda-crystallin homolog GN=CRYL1 OS=Pongo abelii (Sumatran orangutan) PE=2 SV=3	Lambda-crystallin like protein {ECO:0000313|EMBL:ELW47570.1} OS=Tupaia chinensis (Chinese tree shrew) PE=4 SV=1	PREDICTED: lambda-crystallin homolog [Ursus maritimus]
gene18119	[I]	Lipid transport and metabolism	Biological Process: protein N-linked glycosylation (GO:0006487);; Cellular Component: integral component of endoplasmic reticulum membrane (GO:0030176);; Molecular Function: dolichyldiphosphatase activity (GO:0047874);;	K07252|8.00657e-158|lve:103076436|DOLPP1; dolichyldiphosphatase 1; K07252 dolichyldiphosphatase [EC:3.6.1.43] (A)	[I]	Lipid transport and metabolism	Dolichyldiphosphatase 1 GN=DOLPP1 OS=Rhinolophus ferrumequinum (Greater horseshoe bat) PE=3 SV=1	Uncharacterized protein {ECO:0000313|Ensembl:ENSAMEP00000016816} OS=Ailuropoda melanoleuca (Giant panda) PE=4 SV=1	PREDICTED: dolichyldiphosphatase 1 isoform 1 [Orcinus orca]
gene14618	[I]	Lipid transport and metabolism	Biological Process: G-protein coupled receptor internalization (GO:0002031);; Molecular Function: catalytic activity (GO:0003824);; Cellular Component: brush border membrane (GO:0031526);; Molecular Function: phosphatidylinositol binding (GO:0035091);;	K01115|0|cfr:102520901|PLD2; phospholipase D2; K01115 phospholipase D1/2 [EC:3.1.4.4] (A)	[I]	Lipid transport and metabolism	Phospholipase D2 GN=PLD2 OS=Bos taurus (Bovine) PE=2 SV=1	Phospholipase D2 {ECO:0000313|EMBL:ELK24086.1} OS=Myotis davidii (David's myotis) PE=4 SV=1	PREDICTED: phospholipase D2 isoform X1 [Vicugna pacos]
gene4189	[I]	Lipid transport and metabolism	Biological Process: blood vessel development (GO:0001568);; Biological Process: gastrulation with mouth forming second (GO:0001702);; Biological Process: negative regulation of protein phosphorylation (GO:0001933);; Molecular Function: integrin binding (GO:0005178);; Biological Process: phospholipid metabolic process (GO:0006644);; Cellular Component: membrane (GO:0016020);; Biological Process: r…	K01080|0|cfa:479557|PPAP2B; phosphatidic acid phosphatase type 2B; K01080 phosphatidate phosphatase [EC:3.1.3.4] (A)	[I]	Lipid transport and metabolism	Lipid phosphate phosphohydrolase 3 GN=PPAP2B OS=Bos taurus (Bovine) PE=2 SV=1	Uncharacterized protein {ECO:0000313|Ensembl:ENSCAFP00000038294} OS=Canis familiaris (Dog) PE=4 SV=1	PREDICTED: lipid phosphate phosphohydrolase 3 [Ceratotherium simum simum]
gene3208	[I]	Lipid transport and metabolism	Molecular Function: hydroxymethylglutaryl-CoA synthase activity (GO:0004421);; Cellular Component: mitochondrial inner membrane (GO:0005743);; Biological Process: cholesterol biosynthetic process (GO:0006695);; Biological Process: isoprenoid biosynthetic process (GO:0008299);;	K01641|0|umr:103677121|HMGCS2; 3-hydroxy-3-methylglutaryl-CoA synthase 2 (mitochondrial); K01641 hydroxymethylglutaryl-CoA synthase [EC:2.3.3.10] (A)	[I]	Lipid transport and metabolism	Hydroxymethylglutaryl-CoA synthase, mitochondrial (Precursor) GN=HMGCS2 OS=Bos taurus (Bovine) PE=1 SV=1	Uncharacterized protein {ECO:0000313|Ensembl:ENSFCAP00000010660} OS=Felis catus (Cat) PE=4 SV=1	PREDICTED: hydroxymethylglutaryl-CoA synthase, mitochondrial [Ursus maritimus]
gene11484	[I]	Lipid transport and metabolism	Molecular Function: acetyl-CoA carboxylase activity (GO:0003989);; Molecular Function: biotin carboxylase activity (GO:0004075);; Molecular Function: ATP binding (GO:0005524);; Cellular Component: mitochondrion (GO:0005739);; Biological Process: acetyl-CoA metabolic process (GO:0006084);; Biological Process: fatty acid biosynthetic process (GO:0006633);; Molecular Function: metal ion binding (GO:…	K11262|0|ecb:100066740|ACACB; acetyl-CoA carboxylase beta; K11262 acetyl-CoA carboxylase / biotin carboxylase [EC:6.4.1.2 6.3.4.14] (A)	[I]	Lipid transport and metabolism	Biotin carboxylase GN=ACACA OS=Ovis aries (Sheep) PE=2 SV=1	Uncharacterized protein {ECO:0000313|Ensembl:ENSECAP00000014815} OS=Equus caballus (Horse) PE=4 SV=1	PREDICTED: acetyl-CoA carboxylase 2 isoform X1 [Equus caballus]
gene4455	[I]	Lipid transport and metabolism	Molecular Function: 3-hydroxyacyl-CoA dehydrogenase activity (GO:0003857);; Molecular Function: enoyl-CoA hydratase activity (GO:0004300);; Cellular Component: nucleolus (GO:0005730);; Cellular Component: mitochondrial inner membrane (GO:0005743);; Biological Process: fatty acid beta-oxidation (GO:0006635);; Cellular Component: mitochondrial fatty acid beta-oxidation multienzyme complex (GO:00165…	K07515|0|ecb:100071381|HADHA; hydroxyacyl-CoA dehydrogenase/3-ketoacyl-CoA thiolase/enoyl-CoA hydratase (trifunctional protein), alpha subunit; K07515 enoyl-CoA hydratase / long-chain 3-hydroxyacyl-CoA dehydrogenase [EC:4.2.1.17 1.1.1.211] (A)	[I]	Lipid transport and metabolism	Long chain 3-hydroxyacyl-CoA dehydrogenase (Precursor) GN=HADHA OS=Sus scrofa (Pig) PE=1 SV=1	Uncharacterized protein {ECO:0000313|Ensembl:ENSECAP00000013839} OS=Equus caballus (Horse) PE=3 SV=1	PREDICTED: trifunctional enzyme subunit alpha, mitochondrial isoform 1 [Ceratotherium simum simum]
gene433	[I]	Lipid transport and metabolism	Molecular Function: catalytic activity (GO:0003824);; Cellular Component: nucleus (GO:0005634);; Biological Process: metabolic process (GO:0008152);; Molecular Function: methylated histone binding (GO:0035064);;	--	[I]	Lipid transport and metabolism	Enoyl-CoA hydratase, mitochondrial (Precursor) GN=ECHS1 OS=Pongo abelii (Sumatran orangutan) PE=2 SV=1	Uncharacterized protein {ECO:0000313|Ensembl:ENSAMEP00000017939} (Fragment) OS=Ailuropoda melanoleuca (Giant panda) PE=4 SV=1	hypothetical protein PANDA_020123 [Ailuropoda melanoleuca]
gene10403	[I]	Lipid transport and metabolism	Cellular Component: mitochondrion (GO:0005739);;	K18588|3.55409e-154|umr:103659710|COQ10B; coenzyme Q10 homolog B (S. cerevisiae); K18588 coenzyme Q-binding protein COQ10 (A)	[I]	Lipid transport and metabolism	Coenzyme Q-binding protein COQ10 homolog B, mitochondrial (Precursor) GN=COQ10B OS=Pongo abelii (Sumatran orangutan) PE=2 SV=1	Uncharacterized protein {ECO:0000313|Ensembl:ENSAMEP00000014541} OS=Ailuropoda melanoleuca (Giant panda) PE=4 SV=1	PREDICTED: coenzyme Q-binding protein COQ10 homolog B, mitochondrial [Ursus maritimus]
gene3010	[I]	Lipid transport and metabolism	Molecular Function: acyl-CoA dehydrogenase activity (GO:0003995);; Molecular Function: flavin adenine dinucleotide binding (GO:0050660);; Biological Process: oxidation-reduction process (GO:0055114);;	K09478|0|tup:102474463|ACADSB; acyl-CoA dehydrogenase, short/branched chain; K09478 short/branched chain acyl-CoA dehydrogenase [EC:1.3.99.12] (A)	[I]	Lipid transport and metabolism	Short/branched chain specific acyl-CoA dehydrogenase, mitochondrial (Precursor) GN=ACADSB OS=Pongo abelii (Sumatran orangutan) PE=2 SV=1	Uncharacterized protein {ECO:0000313|Ensembl:ENSMPUP00000002755} OS=Mustela putorius furo (European domestic ferret) PE=3 SV=1	PREDICTED: short/branched chain specific acyl-CoA dehydrogenase, mitochondrial [Odobenus rosmarus divergens]
gene27026	[I]	Lipid transport and metabolism	Biological Process: metabolic process (GO:0008152);; Molecular Function: transferase activity, transferring acyl groups (GO:0016746);;	--	[I]	Lipid transport and metabolism	Transmembrane protein 68 GN=TMEM68 OS=Bos taurus (Bovine) PE=2 SV=1	Putative uncharacterized protein {ECO:0000313|EMBL:EFB13377.1} (Fragment) OS=Ailuropoda melanoleuca (Giant panda) PE=4 SV=1	PREDICTED: transmembrane protein 68 isoform X4 [Mustela putorius furo]
gene13829	[I]	Lipid transport and metabolism	--	K12417|0|cfa:489576|ACOT11; acyl-CoA thioesterase 11; K12417 acyl-CoA thioesteraes 11 [EC:3.1.2.-] (A)	[I]	Lipid transport and metabolism	--	Uncharacterized protein {ECO:0000313|Ensembl:ENSMPUP00000006807} OS=Mustela putorius furo (European domestic ferret) PE=4 SV=1	PREDICTED: acyl-coenzyme A thioesterase 11 isoform X1 [Mustela putorius furo]
gene2608	[I]	Lipid transport and metabolism	Molecular Function: fatty-acyl-CoA binding (GO:0000062);; Molecular Function: catalytic activity (GO:0003824);; Molecular Function: receptor binding (GO:0005102);; Cellular Component: mitochondrion (GO:0005739);; Biological Process: fatty acid catabolic process (GO:0009062);;	K13239|0|mcf:101865420|uncharacterized LOC101865420; K13239 peroxisomal 3,2-trans-enoyl-CoA isomerase [EC:5.3.3.8] (A)	[I]	Lipid transport and metabolism	Acyl-CoA-binding protein GN=DBI OS=Oryctolagus cuniculus (Rabbit) PE=3 SV=3	Peroxisomal 3,2-trans-enoyl-CoA isomerase {ECO:0000313|EMBL:EHH17923.1} (Fragment) OS=Macaca mulatta (Rhesus macaque) PE=4 SV=1	PREDICTED: enoyl-CoA delta isomerase 2, mitochondrial isoform X1 [Myotis davidii]
gene11658	[I]	Lipid transport and metabolism	Molecular Function: iron ion binding (GO:0005506);; Cellular Component: endoplasmic reticulum (GO:0005783);; Biological Process: fatty acid biosynthetic process (GO:0006633);; Biological Process: membrane lipid metabolic process (GO:0006643);; Cellular Component: integral component of membrane (GO:0016021);; Biological Process: ether lipid metabolic process (GO:0046485);; Molecular Function: glyc…	K15537|0|pale:102888896|AGMO; alkylglycerol monooxygenase; K15537 alkylglycerol monooxygenase [EC:1.14.16.5] (A)	[I]	Lipid transport and metabolism	--	Uncharacterized protein {ECO:0000313|Ensembl:ENSCAFP00000003511} OS=Canis familiaris (Dog) PE=4 SV=2	PREDICTED: alkylglycerol monooxygenase [Ceratotherium simum simum]
gene11690	[I]	Lipid transport and metabolism	Molecular Function: hydroxymethylglutaryl-CoA synthase activity (GO:0004421);; Cellular Component: nucleus (GO:0005634);; Cellular Component: cytoplasm (GO:0005737);; Cellular Component: plasma membrane (GO:0005886);; Biological Process: isoprenoid biosynthetic process (GO:0008299);;	K01641|0|ecb:100065037|HMGCS1; 3-hydroxy-3-methylglutaryl-CoA synthase 1 (soluble); K01641 hydroxymethylglutaryl-CoA synthase [EC:2.3.3.10] (A)	[I]	Lipid transport and metabolism	Hydroxymethylglutaryl-CoA synthase, cytoplasmic GN=HMGCS1 OS=Pongo abelii (Sumatran orangutan) PE=2 SV=1	Uncharacterized protein {ECO:0000313|Ensembl:ENSECAP00000006800} OS=Equus caballus (Horse) PE=4 SV=1	PREDICTED: hydroxymethylglutaryl-CoA synthase, cytoplasmic isoform 1 [Ceratotherium simum simum]
gene18673	[I]	Lipid transport and metabolism	Molecular Function: ATP binding (GO:0005524);; Cellular Component: mitochondrion (GO:0005739);; Cellular Component: endoplasmic reticulum (GO:0005783);; Biological Process: phosphatidylglycerol biosynthetic process (GO:0006655);; Molecular Function: CDP-diacylglycerol-glycerol-3-phosphate 3-phosphatidyltransferase activity (GO:0008444);;	K00995|0|cfa:475920|PGS1; phosphatidylglycerophosphate synthase 1; K00995 CDP-diacylglycerol--glycerol-3-phosphate 3-phosphatidyltransferase [EC:2.7.8.5] (A)	[I]	Lipid transport and metabolism	CDP-diacylglycerol--glycerol-3-phosphate 3-phosphatidyltransferase, mitochondrial (Precursor) GN=PGS1 OS=Bos taurus (Bovine) PE=2 SV=2	Uncharacterized protein {ECO:0000313|Ensembl:ENSCAFP00000007937} OS=Canis familiaris (Dog) PE=4 SV=2	PREDICTED: CDP-diacylglycerol--glycerol-3-phosphate 3-phosphatidyltransferase, mitochondrial [Leptonychotes weddellii]
gene22274	[I]	Lipid transport and metabolism	--	K11262|0|lve:103091411|ACACA; acetyl-CoA carboxylase alpha; K11262 acetyl-CoA carboxylase / biotin carboxylase [EC:6.4.1.2 6.3.4.14] (A)	[I]	Lipid transport and metabolism	Biotin carboxylase GN=ACACA OS=Ovis aries (Sheep) PE=2 SV=1	Uncharacterized protein {ECO:0000313|Ensembl:ENSAMEP00000014229} (Fragment) OS=Ailuropoda melanoleuca (Giant panda) PE=4 SV=1	PREDICTED: acetyl-CoA carboxylase 1 isoform X1 [Sorex araneus]
gene13271	[I]	Lipid transport and metabolism	Molecular Function: acetyl-CoA C-acyltransferase activity (GO:0003988);; Cellular Component: mitochondrial outer membrane (GO:0005741);; Cellular Component: mitochondrial inner membrane (GO:0005743);; Cellular Component: endoplasmic reticulum (GO:0005783);; Biological Process: fatty acid beta-oxidation (GO:0006635);; Molecular Function: long-chain-3-hydroxyacyl-CoA dehydrogenase activity (GO:0016…	K07509|0|umr:103671671|HADHB; hydroxyacyl-CoA dehydrogenase/3-ketoacyl-CoA thiolase/enoyl-CoA hydratase (trifunctional protein), beta subunit; K07509 acetyl-CoA acyltransferase [EC:2.3.1.16] (A)	[I]	Lipid transport and metabolism	3-ketoacyl-CoA thiolase (Precursor) GN=HADHB OS=Pan troglodytes (Chimpanzee) PE=2 SV=1	Putative 3-ketoacyl-coa thiolase {ECO:0000313|EMBL:JAA47667.1} OS=Desmodus rotundus (Vampire bat) PE=2 SV=1	PREDICTED: trifunctional enzyme subunit beta, mitochondrial [Galeopterus variegatus]
gene21572	[I]	Lipid transport and metabolism	Molecular Function: acyl-CoA ligase activity (GO:0003996);; Molecular Function: ATP binding (GO:0005524);; Molecular Function: GTP binding (GO:0005525);; Cellular Component: mitochondrial matrix (GO:0005759);; Biological Process: fatty acid biosynthetic process (GO:0006633);; Molecular Function: fatty acid ligase activity (GO:0015645);; Molecular Function: metal ion binding (GO:0046872);; Molecul…	K01896|6.76741e-68|bacu:103005605|acyl-coenzyme A synthetase ACSM1, mitochondrial-like; K01896 medium-chain acyl-CoA synthetase [EC:6.2.1.2] (A)	[I]	Lipid transport and metabolism	Acyl-coenzyme A synthetase ACSM1, mitochondrial (Precursor) GN=ACSM1 OS=Bos taurus (Bovine) PE=1 SV=2	Uncharacterized protein {ECO:0000313|Ensembl:ENSMLUP00000017522} (Fragment) OS=Myotis lucifugus (Little brown bat) PE=4 SV=1	PREDICTED: acyl-coenzyme A synthetase ACSM1, mitochondrial-like [Balaenoptera acutorostrata scammoni]
gene15755	[I]	Lipid transport and metabolism	Molecular Function: catalytic activity (GO:0003824);; Cellular Component: mitochondrion (GO:0005739);; Biological Process: metabolic process (GO:0008152);;	K01908|0|bacu:103017236|ACSS3; acyl-CoA synthetase short-chain family member 3; K01908 propionyl-CoA synthetase [EC:6.2.1.17] (A)	[I]	Lipid transport and metabolism	Acyl-CoA synthetase short-chain family member 3, mitochondrial (Precursor) GN=ACSS3 OS=Bos taurus (Bovine) PE=2 SV=1	Uncharacterized protein {ECO:0000313|Ensembl:ENSMPUP00000004841} OS=Mustela putorius furo (European domestic ferret) PE=4 SV=1	PREDICTED: acyl-CoA synthetase short-chain family member 3, mitochondrial isoform X2 [Balaenoptera acutorostrata scammoni]
gene6303	[I]	Lipid transport and metabolism	Biological Process: arachidonic acid metabolic process (GO:0019369);; Molecular Function: protein homodimerization activity (GO:0042803);; Biological Process: acylglycerol catabolic process (GO:0046464);; Molecular Function: acylglycerol lipase activity (GO:0047372);; Biological Process: regulation of inflammatory response (GO:0050727);; Biological Process: regulation of sensory perception of pai…	K01054|0|ptg:102967666|MGLL; monoglyceride lipase; K01054 acylglycerol lipase [EC:3.1.1.23] (A)	[I]	Lipid transport and metabolism	--	Uncharacterized protein {ECO:0000313|Ensembl:ENSPANP00000015158} OS=Papio anubis (Olive baboon) PE=4 SV=1	PREDICTED: monoglyceride lipase isoform X1 [Mustela putorius furo]
gene6922	[I]	Lipid transport and metabolism	Molecular Function: glycerol-3-phosphate O-acyltransferase activity (GO:0004366);; Molecular Function: receptor binding (GO:0005102);; Cellular Component: peroxisomal membrane (GO:0005778);; Biological Process: glycerophospholipid metabolic process (GO:0006650);; Biological Process: synapse assembly (GO:0007416);; Biological Process: ether lipid biosynthetic process (GO:0008611);; Biological Proc…	K00649|0|umr:103661874|GNPAT; glyceronephosphate O-acyltransferase; K00649 glyceronephosphate O-acyltransferase [EC:2.3.1.42] (A)	[I]	Lipid transport and metabolism	Dihydroxyacetone phosphate acyltransferase GN=GNPAT OS=Bos taurus (Bovine) PE=2 SV=1	Uncharacterized protein {ECO:0000313|Ensembl:ENSMPUP00000005445} OS=Mustela putorius furo (European domestic ferret) PE=4 SV=1	PREDICTED: dihydroxyacetone phosphate acyltransferase isoform X2 [Mustela putorius furo]
gene3594	[I]	Lipid transport and metabolism	Molecular Function: [acyl-carrier-protein] S-malonyltransferase activity (GO:0004314);; Cellular Component: mitochondrion (GO:0005739);; Biological Process: metabolic process (GO:0008152);;	K00645|0|pale:102883234|MCAT; malonyl CoA:ACP acyltransferase (mitochondrial); K00645 [acyl-carrier-protein] S-malonyltransferase [EC:2.3.1.39] (A)	[I]	Lipid transport and metabolism	--	Malonyl CoA-acyl carrier protein transacylase, mitochondrial {ECO:0000313|EMBL:ELK07941.1} OS=Pteropus alecto (Black flying fox) PE=4 SV=1	PREDICTED: malonyl-CoA-acyl carrier protein transacylase, mitochondrial [Pteropus alecto]
gene5358	[I]	Lipid transport and metabolism	Cellular Component: cytosol (GO:0005829);; Biological Process: fatty acid catabolic process (GO:0009062);; Molecular Function: palmitoyl-CoA hydrolase activity (GO:0016290);; Cellular Component: neuron projection (GO:0043005);; Cellular Component: cell body (GO:0044297);;	K17360|1.77337e-60|ggo:101126562|ACOT7; cytosolic acyl coenzyme A thioester hydrolase; K17360 acyl-coenzyme A thioesterase 7 [EC:3.1.2.2] (A)	[I]	Lipid transport and metabolism	--	Cytosolic acyl coenzyme A thioester hydrolase-like protein {ECO:0000313|EMBL:ABQ22382.1} (Fragment) OS=Callithrix jacchus (White-tufted-ear marmoset) PE=2 SV=1	PREDICTED: cytosolic acyl coenzyme A thioester hydrolase-like, partial [Tursiops truncatus]
gene17936	[I]	Lipid transport and metabolism	--	K13238|9.36378e-134|lve:103084867|ECI1; enoyl-CoA delta isomerase 1; K13238 3,2-trans-enoyl-CoA isomerase, mitochondrial [EC:5.3.3.8] (A)	[I]	Lipid transport and metabolism	Long chain 3-hydroxyacyl-CoA dehydrogenase (Precursor) GN=HADHA OS=Sus scrofa (Pig) PE=1 SV=1	Putative hydroxyacyl-coa dehydrogenase/enoyl-coa hydratase {ECO:0000313|EMBL:JAA46341.1} OS=Desmodus rotundus (Vampire bat) PE=2 SV=1	PREDICTED: enoyl-CoA delta isomerase 1, mitochondrial isoform X2 [Physeter catodon]
gene3992	[I]	Lipid transport and metabolism	Molecular Function: phosphatidate cytidylyltransferase activity (GO:0004605);; Cellular Component: endoplasmic reticulum membrane (GO:0005789);; Biological Process: phosphatidylinositol biosynthetic process (GO:0006661);; Cellular Component: integral component of membrane (GO:0016021);; Biological Process: CDP-diacylglycerol biosynthetic process (GO:0016024);;	K00981|0|fca:101082147|CDS1; CDP-diacylglycerol synthase (phosphatidate cytidylyltransferase) 1; K00981 phosphatidate cytidylyltransferase [EC:2.7.7.41] (A)	[I]	Lipid transport and metabolism	Phosphatidate cytidylyltransferase 2 GN=CDS2 OS=Bos taurus (Bovine) PE=1 SV=1	Phosphatidate cytidylyltransferase {ECO:0000256|RuleBase:RU003938} OS=Nomascus leucogenys (Northern white-cheeked gibbon) PE=3 SV=1	PREDICTED: phosphatidate cytidylyltransferase 1 [Equus przewalskii]
gene1557	[I]	Lipid transport and metabolism	--	K17361|0|ecb:100060045|ACOT9; acyl-CoA thioesterase 9; K17361 acyl-coenzyme A thioesterase 9 [EC:3.1.2.-] (A)	[I]	Lipid transport and metabolism	Acyl-coenzyme A thioesterase 9, mitochondrial (Precursor) GN=ACOT9 OS=Bos taurus (Bovine) PE=2 SV=1	Uncharacterized protein {ECO:0000313|Ensembl:ENSCAFP00000040400} OS=Canis familiaris (Dog) PE=4 SV=1	PREDICTED: acyl-coenzyme A thioesterase 9, mitochondrial [Equus caballus]
gene6217	[I]	Lipid transport and metabolism	Molecular Function: glycerol-3-phosphate O-acyltransferase activity (GO:0004366);; Cellular Component: endoplasmic reticulum membrane (GO:0005789);; Biological Process: triglyceride biosynthetic process (GO:0019432);; Biological Process: regulation of TOR signaling (GO:0032006);;	K13506|0|pon:100450687|AGPAT9; 1-acylglycerol-3-phosphate O-acyltransferase 9; K13506 glycerol-3-phosphate O-acyltransferase 3/4 [EC:2.3.1.15] (A)	[I]	Lipid transport and metabolism	Glycerol-3-phosphate acyltransferase 4 (Precursor) GN=AGPAT6 OS=Pongo abelii (Sumatran orangutan) PE=2 SV=2	Uncharacterized protein {ECO:0000313|Ensembl:ENSPPYP00000016638} OS=Pongo abelii (Sumatran orangutan) PE=4 SV=1	PREDICTED: glycerol-3-phosphate acyltransferase 3 isoform X1 [Balaenoptera acutorostrata scammoni]
gene541	[I]	Lipid transport and metabolism	Biological Process: cholesterol metabolic process (GO:0008203);; Biological Process: lipid catabolic process (GO:0016042);; Molecular Function: lipase activity (GO:0016298);;	K07188|0|cfa:403607|LIPE, HSL; lipase, hormone-sensitive; K07188 hormone-sensitive lipase [EC:3.1.1.79] (A)	[I]	Lipid transport and metabolism	Hormone-sensitive lipase GN=LIPE OS=Sus scrofa (Pig) PE=2 SV=1	Uncharacterized protein {ECO:0000313|Ensembl:ENSCAFP00000007187} (Fragment) OS=Canis familiaris (Dog) PE=4 SV=2	PREDICTED: hormone-sensitive lipase isoform X6 [Canis lupus familiaris]
gene5121	[I]	Lipid transport and metabolism	Molecular Function: receptor binding (GO:0005102);; Cellular Component: mitochondrion (GO:0005739);; Cellular Component: peroxisomal matrix (GO:0005782);; Biological Process: acyl-CoA metabolic process (GO:0006637);; Molecular Function: palmitoyl-CoA hydrolase activity (GO:0016290);; Biological Process: peroxisome fission (GO:0016559);; Biological Process: dicarboxylic acid catabolic process (GO:…	K11992|0|cfa:477247|ACOT8; acyl-CoA thioesterase 8; K11992 acyl-CoA thioesterase 8 [EC:3.1.2.27] (A)	[I]	Lipid transport and metabolism	--	Uncharacterized protein {ECO:0000313|Ensembl:ENSCAFP00000014353} OS=Canis familiaris (Dog) PE=4 SV=1	PREDICTED: acyl-coenzyme A thioesterase 8 [Chrysochloris asiatica]
gene15509	[I]	Lipid transport and metabolism	Molecular Function: acetyl-CoA carboxylase activity (GO:0003989);; Molecular Function: biotin carboxylase activity (GO:0004075);; Molecular Function: ATP binding (GO:0005524);; Biological Process: fatty acid biosynthetic process (GO:0006633);; Molecular Function: metal ion binding (GO:0046872);;	K11262|0|cfa:491130|ACACA; acetyl-CoA carboxylase alpha; K11262 acetyl-CoA carboxylase / biotin carboxylase [EC:6.4.1.2 6.3.4.14] (A)	[I]	Lipid transport and metabolism	Biotin carboxylase GN=ACACA OS=Bos taurus (Bovine) PE=2 SV=1	Uncharacterized protein {ECO:0000313|Ensembl:ENSCAFP00000026669} OS=Canis familiaris (Dog) PE=4 SV=2	PREDICTED: acetyl-CoA carboxylase 1 isoform X12 [Panthera tigris altaica]
gene12695	[I]	Lipid transport and metabolism	Biological Process: temperature homeostasis (GO:0001659);; Molecular Function: acyl-CoA dehydrogenase activity (GO:0003995);; Cellular Component: mitochondrial inner membrane (GO:0005743);; Biological Process: fatty acid beta-oxidation using acyl-CoA dehydrogenase (GO:0033539);; Cellular Component: mitochondrial nucleoid (GO:0042645);; Biological Process: negative regulation of fatty acid biosynt…	K09479|0|oas:101117173|ACADVL; acyl-CoA dehydrogenase, very long chain; K09479 very long chain acyl-CoA dehydrogenase [EC:1.3.8.9] (A)	[I]	Lipid transport and metabolism	Very long-chain specific acyl-CoA dehydrogenase, mitochondrial (Precursor) GN=ACADVL OS=Bos taurus (Bovine) PE=2 SV=3	Uncharacterized protein {ECO:0000313|Ensembl:ENSOARP00000011440} (Fragment) OS=Ovis aries (Sheep) PE=3 SV=1	PREDICTED: very long-chain specific acyl-CoA dehydrogenase, mitochondrial isoform 1 [Ceratotherium simum simum]
gene6634	[I]	Lipid transport and metabolism	Molecular Function: C-4 methylsterol oxidase activity (GO:0000254);; Molecular Function: iron ion binding (GO:0005506);; Cellular Component: endoplasmic reticulum membrane (GO:0005789);; Biological Process: fatty acid biosynthetic process (GO:0006633);; Cellular Component: integral component of membrane (GO:0016021);; Biological Process: sterol biosynthetic process (GO:0016126);; Biological Proce…	K07750|0|phd:102324474|MSMO1; methylsterol monooxygenase 1; K07750 methylsterol monooxygenase [EC:1.14.13.72] (A)	[I]	Lipid transport and metabolism	Methylsterol monooxygenase 1 GN=MSMO1 OS=Pongo abelii (Sumatran orangutan) PE=2 SV=1	C-4 methylsterol oxidase {ECO:0000313|EMBL:ELR54542.1} OS=Bos mutus PE=4 SV=1	PREDICTED: methylsterol monooxygenase 1 [Pantholops hodgsonii]
gene1578	[I]	Lipid transport and metabolism	Biological Process: very long-chain fatty acid metabolic process (GO:0000038);; Molecular Function: acyl-CoA dehydrogenase activity (GO:0003995);; Molecular Function: acyl-CoA oxidase activity (GO:0003997);; Molecular Function: receptor binding (GO:0005102);; Cellular Component: mitochondrion (GO:0005739);; Cellular Component: peroxisomal membrane (GO:0005778);; Biological Process: generation of …	K00232|0|cfa:483322|ACOX1; acyl-CoA oxidase 1, palmitoyl; K00232 acyl-CoA oxidase [EC:1.3.3.6] (A)	[I]	Lipid transport and metabolism	Peroxisomal acyl-coenzyme A oxidase 1 GN=ACOX1 OS=Pongo abelii (Sumatran orangutan) PE=2 SV=2	Acyl-coenzyme A oxidase {ECO:0000256|PIRNR:PIRNR000168} OS=Canis familiaris (Dog) PE=3 SV=1	PREDICTED: peroxisomal acyl-coenzyme A oxidase 1 isoformX1 [Canis lupus familiaris]
gene5080	[I]	Lipid transport and metabolism	Cellular Component: endoplasmic reticulum (GO:0005783);; Cellular Component: plasma membrane (GO:0005886);; Biological Process: metabolic process (GO:0008152);; Molecular Function: transferase activity, transferring acyl groups (GO:0016746);;	K13523|0|ecb:100057170|AGPAT3; 1-acylglycerol-3-phosphate O-acyltransferase 3; K13523 lysophosphatidic acid acyltransferase / lysophosphatidylinositol acyltransferase [EC:2.3.1.51 2.3.1.-] (A)	[I]	Lipid transport and metabolism	1-acyl-sn-glycerol-3-phosphate acyltransferase gamma GN=AGPAT3 OS=Pongo abelii (Sumatran orangutan) PE=2 SV=1	Uncharacterized protein {ECO:0000313|Ensembl:ENSECAP00000020477} OS=Equus caballus (Horse) PE=4 SV=1	PREDICTED: 1-acyl-sn-glycerol-3-phosphate acyltransferase gamma [Equus caballus]
gene7392	[I]	Lipid transport and metabolism	Molecular Function: enoyl-CoA hydratase activity (GO:0004300);; Cellular Component: mitochondrial matrix (GO:0005759);; Biological Process: fatty acid beta-oxidation (GO:0006635);;	K07511|0|hgl:101697414|Echs1; enoyl CoA hydratase, short chain, 1, mitochondrial; K07511 enoyl-CoA hydratase [EC:4.2.1.17] (A)	[I]	Lipid transport and metabolism	Enoyl-CoA hydratase, mitochondrial (Precursor) GN=ECHS1 OS=Bos taurus (Bovine) PE=2 SV=1	Uncharacterized protein {ECO:0000313|Ensembl:ENSLAFP00000015005} OS=Loxodonta africana (African elephant) PE=3 SV=1	PREDICTED: enoyl-CoA hydratase, mitochondrial isoform X2 [Mustela putorius furo]
gene25808	[I]	Lipid transport and metabolism	--	K00626|7.46287e-94|mcc:707653|ACAT1; acetyl-CoA acetyltransferase 1 (EC:2.3.1.9); K00626 acetyl-CoA C-acetyltransferase [EC:2.3.1.9] (A)	[I]	Lipid transport and metabolism	Acetyl-CoA acetyltransferase, mitochondrial (Precursor) GN=ACAT1 OS=Macaca fascicularis (Crab-eating macaque) PE=2 SV=1	Acetyl-CoA acetyltransferase, mitochondrial {ECO:0000313|EMBL:BAK62098.1} OS=Pan troglodytes (Chimpanzee) PE=2 SV=1	PREDICTED: acetyl-CoA acetyltransferase, mitochondrial [Galeopterus variegatus]
gene8934	[I]	Lipid transport and metabolism	Molecular Function: glycylpeptide N-tetradecanoyltransferase activity (GO:0004379);; Cellular Component: Golgi apparatus (GO:0005794);; Cellular Component: plasma membrane (GO:0005886);; Biological Process: N-terminal protein myristoylation (GO:0006499);;	K00671|0|lve:103083512|NMT2; N-myristoyltransferase 2; K00671 glycylpeptide N-tetradecanoyltransferase [EC:2.3.1.97] (A)	[I]	Lipid transport and metabolism	Glycylpeptide N-tetradecanoyltransferase 2 GN=NMT2 OS=Bos taurus (Bovine) PE=2 SV=1	Glycylpeptide N-tetradecanoyltransferase {ECO:0000256|RuleBase:RU000586} (Fragment) OS=Ovis aries (Sheep) PE=3 SV=1	PREDICTED: glycylpeptide N-tetradecanoyltransferase 2 [Lipotes vexillifer]
gene13603	[I]	Lipid transport and metabolism	--	K18588|5.5627e-142|umr:103656931|COQ10A; coenzyme Q10 homolog A (S. cerevisiae); K18588 coenzyme Q-binding protein COQ10 (A)	[I]	Lipid transport and metabolism	Coenzyme Q-binding protein COQ10 homolog B, mitochondrial (Precursor) GN=COQ10B OS=Pongo abelii (Sumatran orangutan) PE=2 SV=1	Coenzyme Q10 homolog A {ECO:0000313|EMBL:JAA17963.1} OS=Pan troglodytes (Chimpanzee) PE=2 SV=1	PREDICTED: coenzyme Q-binding protein COQ10 homolog A, mitochondrial [Ursus maritimus]
gene11786	[I]	Lipid transport and metabolism	Biological Process: glandular epithelial cell maturation (GO:0002071);; Molecular Function: glycerol-3-phosphate O-acyltransferase activity (GO:0004366);; Cellular Component: endoplasmic reticulum (GO:0005783);; Biological Process: fatty acid metabolic process (GO:0006631);; Biological Process: acyl-CoA metabolic process (GO:0006637);; Biological Process: phosphatidylcholine biosynthetic process …	K13506|0|fca:101082396|AGPAT6; 1-acylglycerol-3-phosphate O-acyltransferase 6; K13506 glycerol-3-phosphate O-acyltransferase 3/4 [EC:2.3.1.15] (A)	[I]	Lipid transport and metabolism	Glycerol-3-phosphate acyltransferase 4 (Precursor) GN=AGPAT6 OS=Pongo abelii (Sumatran orangutan) PE=2 SV=2	Glycerol-3-phosphate acyltransferase 4 {ECO:0000313|EMBL:CCP73765.1} OS=Neovison vison (American mink) PE=2 SV=1	PREDICTED: glycerol-3-phosphate acyltransferase 6 [Felis catus]
gene9497	[I]	Lipid transport and metabolism	Molecular Function: acyl-CoA dehydrogenase activity (GO:0003995);; Cellular Component: mitochondrion (GO:0005739);; Molecular Function: flavin adenine dinucleotide binding (GO:0050660);; Biological Process: oxidation-reduction process (GO:0055114);;	K00248|0|ecb:100147113|ACADS, SCAD; acyl-CoA dehydrogenase, C-2 to C-3 short chain; K00248 butyryl-CoA dehydrogenase [EC:1.3.8.1] (A)	[I]	Lipid transport and metabolism	Short-chain specific acyl-CoA dehydrogenase, mitochondrial (Precursor) GN=ACADS OS=Pongo abelii (Sumatran orangutan) PE=2 SV=1	Uncharacterized protein {ECO:0000313|Ensembl:ENSECAP00000010570} (Fragment) OS=Equus caballus (Horse) PE=3 SV=1	PREDICTED: short-chain specific acyl-CoA dehydrogenase, mitochondrial [Ceratotherium simum simum]
gene2896	[I]	Lipid transport and metabolism	Molecular Function: acetate-CoA ligase activity (GO:0003987);; Cellular Component: mitochondrial matrix (GO:0005759);; Molecular Function: AMP binding (GO:0016208);; Biological Process: acetyl-CoA biosynthetic process from acetate (GO:0019427);;	K01895|0|ecb:100057725|ACSS1; acyl-CoA synthetase short-chain family member 1; K01895 acetyl-CoA synthetase [EC:6.2.1.1] (A)	[I]	Lipid transport and metabolism	Acyl-CoA synthetase short-chain family member 3, mitochondrial (Precursor) GN=ACSS3 OS=Pongo abelii (Sumatran orangutan) PE=2 SV=1	Acetyl-coenzyme A synthetase {ECO:0000256|RuleBase:RU361147} OS=Desmodus rotundus (Vampire bat) PE=2 SV=1	PREDICTED: acetyl-coenzyme A synthetase 2-like, mitochondrial [Leptonychotes weddellii]
gene3620	[I]	Lipid transport and metabolism	Molecular Function: acetate-CoA ligase activity (GO:0003987);; Cellular Component: nucleus (GO:0005634);; Cellular Component: cytoplasm (GO:0005737);; Biological Process: acetyl-CoA biosynthetic process (GO:0006085);; Biological Process: lipid biosynthetic process (GO:0008610);;	K01895|0|umr:103669813|ACSS2; acyl-CoA synthetase short-chain family member 2; K01895 acetyl-CoA synthetase [EC:6.2.1.1] (A)	[I]	Lipid transport and metabolism	Acyl-CoA synthetase short-chain family member 3, mitochondrial (Precursor) GN=ACSS3 OS=Bos taurus (Bovine) PE=2 SV=1	Uncharacterized protein {ECO:0000313|Ensembl:ENSCAFP00000011358} OS=Canis familiaris (Dog) PE=4 SV=2	PREDICTED: acetyl-coenzyme A synthetase, cytoplasmic isoform 2 [Canis lupus familiaris]
gene8936	[I]	Lipid transport and metabolism	Molecular Function: fatty-acyl-CoA binding (GO:0000062);; Molecular Function: lipid binding (GO:0008289);;	--	[I]	Lipid transport and metabolism	Acyl-CoA-binding domain-containing protein 7 GN=ACBD7 OS=Bos taurus (Bovine) PE=3 SV=1	Uncharacterized protein {ECO:0000313|Ensembl:ENSMLUP00000013565} (Fragment) OS=Myotis lucifugus (Little brown bat) PE=4 SV=1	PREDICTED: acyl-CoA-binding domain-containing protein 7-like [Bubalus bubalis]
gene24965	[I]	Lipid transport and metabolism	Molecular Function: calcium ion binding (GO:0005509);; Biological Process: metabolic process (GO:0008152);; Molecular Function: transferase activity, transferring acyl groups (GO:0016746);;	K13512|0|ecb:100071891|LPCAT4; lysophosphatidylcholine acyltransferase 4; K13512 lysophospholipid acyltransferase [EC:2.3.1.23 2.3.1.-] (A)	[I]	Lipid transport and metabolism	Glycerol-3-phosphate acyltransferase 4 (Precursor) GN=AGPAT6 OS=Bos taurus (Bovine) PE=3 SV=1	Uncharacterized protein {ECO:0000313|Ensembl:ENSECAP00000020494} OS=Equus caballus (Horse) PE=4 SV=1	PREDICTED: lysophospholipid acyltransferase LPCAT4 [Equus caballus]
gene27000	[I]	Lipid transport and metabolism	Molecular Function: dolichol kinase activity (GO:0004168);; Cellular Component: integral component of endoplasmic reticulum membrane (GO:0030176);; Biological Process: dolichyl monophosphate biosynthetic process (GO:0043048);;	K00902|0|ssc:100152320|DOLK; dolichol kinase; K00902 dolichol kinase [EC:2.7.1.108] (A)	[I]	Lipid transport and metabolism	Dolichol kinase GN=DOLK OS=Bos taurus (Bovine) PE=2 SV=1	Uncharacterized protein {ECO:0000313|Ensembl:ENSSSCP00000006070} OS=Sus scrofa (Pig) PE=4 SV=1	PREDICTED: dolichol kinase [Sus scrofa]
gene24605	[I]	Lipid transport and metabolism	Cellular Component: cytoplasm (GO:0005737);; Biological Process: metabolic process (GO:0008152);; Molecular Function: transferase activity, transferring acyl groups (GO:0016746);;	K13514|0|ecb:100051072|LPGAT1; lysophosphatidylglycerol acyltransferase 1; K13514 lysophosphatidylglycerol acyltransferase 1 [EC:2.3.1.-] (A)	[I]	Lipid transport and metabolism	--	Uncharacterized protein {ECO:0000313|Ensembl:ENSECAP00000011121} (Fragment) OS=Equus caballus (Horse) PE=4 SV=1	PREDICTED: acyl-CoA:lysophosphatidylglycerol acyltransferase 1 isoform 1 [Ceratotherium simum simum]
gene14931	[I]	Lipid transport and metabolism	Biological Process: in utero embryonic development (GO:0001701);; Molecular Function: glycylpeptide N-tetradecanoyltransferase activity (GO:0004379);; Cellular Component: cytoplasm (GO:0005737);; Cellular Component: plasma membrane (GO:0005886);; Biological Process: N-terminal protein myristoylation (GO:0006499);; Cellular Component: actin cytoskeleton (GO:0015629);; Cellular Component: cell junc…	K00671|0|pps:100981120|NMT1; N-myristoyltransferase 1; K00671 glycylpeptide N-tetradecanoyltransferase [EC:2.3.1.97] (A)	[I]	Lipid transport and metabolism	Glycylpeptide N-tetradecanoyltransferase 1 GN=NMT1 OS=Pongo abelii (Sumatran orangutan) PE=2 SV=1	Glycylpeptide N-tetradecanoyltransferase {ECO:0000256|RuleBase:RU000586} OS=Pongo abelii (Sumatran orangutan) PE=3 SV=2	PREDICTED: glycylpeptide N-tetradecanoyltransferase 1 [Ceratotherium simum simum]
gene6942	[I]	Lipid transport and metabolism	Molecular Function: acyl-CoA dehydrogenase activity (GO:0003995);; Molecular Function: acyl-CoA oxidase activity (GO:0003997);; Molecular Function: receptor binding (GO:0005102);; Cellular Component: peroxisome (GO:0005777);; Biological Process: fatty acid beta-oxidation (GO:0006635);; Molecular Function: flavin adenine dinucleotide binding (GO:0050660);;	K10214|0|ggo:101135855|ACOX2; peroxisomal acyl-coenzyme A oxidase 2; K10214 3alpha,7alpha,12alpha-trihydroxy-5beta-cholestanoyl-CoA 24-hydroxylase [EC:1.17.99.3] (A)	[I]	Lipid transport and metabolism	Peroxisomal acyl-coenzyme A oxidase 2 GN=ACOX2 OS=Oryctolagus cuniculus (Rabbit) PE=1 SV=1	Acyl-coenzyme A oxidase {ECO:0000256|PIRNR:PIRNR000168} OS=Macaca fascicularis (Crab-eating macaque) PE=3 SV=1	PREDICTED: peroxisomal acyl-coenzyme A oxidase 2 [Vicugna pacos]
gene8529	[I]	Lipid transport and metabolism	Molecular Function: methylmalonyl-CoA decarboxylase activity (GO:0004492);; Cellular Component: cytosol (GO:0005829);;	K18426|8.02244e-53|ptg:102958239|ECHDC1; enoyl CoA hydratase domain containing 1; K18426 ethylmalonyl-CoA/methylmalonyl-CoA decarboxylase [EC:4.1.1.94 4.1.1.41] (A)	[I]	Lipid transport and metabolism	Ethylmalonyl-CoA decarboxylase GN=ECHDC1 OS=Bos taurus (Bovine) PE=2 SV=1	Ethylmalonyl-CoA decarboxylase {ECO:0000313|Ensembl:ENSBTAP00000005072} (Fragment) OS=Bos taurus (Bovine) PE=3 SV=1	PREDICTED: ethylmalonyl-CoA decarboxylase isoform X1 [Elephantulus edwardii]
gene21884	[I]	Lipid transport and metabolism	Biological Process: protein dephosphorylation (GO:0006470);; Molecular Function: phosphatidate phosphatase activity (GO:0008195);; Cellular Component: membrane (GO:0016020);;	K01080|0|tup:102499580|PPAP2A; phosphatidic acid phosphatase type 2A; K01080 phosphatidate phosphatase [EC:3.1.3.4] (A)	[I]	Lipid transport and metabolism	Lipid phosphate phosphohydrolase 2 GN=PPAP2C OS=Bos taurus (Bovine) PE=2 SV=1	Lipid phosphate phosphohydrolase 1 {ECO:0000313|EMBL:ELW65687.1} (Fragment) OS=Tupaia chinensis (Chinese tree shrew) PE=4 SV=1	PREDICTED: lipid phosphate phosphohydrolase 1 isoform X5 [Sus scrofa]
gene12105	[I]	Lipid transport and metabolism	Molecular Function: acetyl-CoA C-acetyltransferase activity (GO:0003985);; Cellular Component: nucleolus (GO:0005730);; Cellular Component: mitochondrion (GO:0005739);; Biological Process: metabolic process (GO:0008152);;	K00626|0|aml:100477493|ACAT2; acetyl-CoA acetyltransferase 2; K00626 acetyl-CoA C-acetyltransferase [EC:2.3.1.9] (A)	[I]	Lipid transport and metabolism	3-ketoacyl-CoA thiolase, mitochondrial GN=ACAA2 OS=Bos taurus (Bovine) PE=2 SV=1	Uncharacterized protein {ECO:0000313|Ensembl:ENSCAFP00000001037} (Fragment) OS=Canis familiaris (Dog) PE=3 SV=1	PREDICTED: acetyl-CoA acetyltransferase, cytosolic [Camelus bactrianus]
gene7887	[I]	Lipid transport and metabolism	Molecular Function: acyl-CoA dehydrogenase activity (GO:0003995);; Cellular Component: mitochondrion (GO:0005739);; Molecular Function: flavin adenine dinucleotide binding (GO:0050660);; Biological Process: oxidation-reduction process (GO:0055114);;	K11538|0|fca:101097759|ACAD8; acyl-CoA dehydrogenase family, member 8; K11538 isobutyryl-CoA dehydrogenase [EC:1.3.99.-] (A)	[I]	Lipid transport and metabolism	Isobutyryl-CoA dehydrogenase, mitochondrial (Precursor) GN=ACAD8 OS=Bos taurus (Bovine) PE=2 SV=1	Putative short chain acyl-coa dehydrogen {ECO:0000313|EMBL:JAA51733.1} (Fragment) OS=Desmodus rotundus (Vampire bat) PE=2 SV=1	PREDICTED: isobutyryl-CoA dehydrogenase, mitochondrial [Ceratotherium simum simum]
gene9770	[I]	Lipid transport and metabolism	Cellular Component: endoplasmic reticulum (GO:0005783);; Biological Process: sphingosine metabolic process (GO:0006670);; Cellular Component: membrane (GO:0016020);; Molecular Function: sphingosine-1-phosphate phosphatase activity (GO:0042392);;	K04717|1.37884e-173|chx:102183470|SGPP2; sphingosine-1-phosphate phosphatase 2; K04717 sphingosine-1-phosphate phosphotase 2 [EC:3.1.3.-] (A)	[I]	Lipid transport and metabolism	--	Uncharacterized protein {ECO:0000313|Ensembl:ENSSSCP00000021731} (Fragment) OS=Sus scrofa (Pig) PE=4 SV=1	PREDICTED: sphingosine-1-phosphate phosphatase 2 [Capra hircus]
gene1785	[I]	Lipid transport and metabolism	Cellular Component: membrane (GO:0016020);; Biological Process: single-organism metabolic process (GO:0044710);;	K07750|3.31769e-138|hsa:10826|FAXDC2, C5orf4; fatty acid hydroxylase domain containing 2; K07750 methylsterol monooxygenase [EC:1.14.13.72] (A)	[I]	Lipid transport and metabolism	Fatty acid hydroxylase domain-containing protein 2 GN=FAXDC2 OS=Macaca fascicularis (Crab-eating macaque) PE=2 SV=1	Uncharacterized protein {ECO:0000313|Ensembl:ENSCAFP00000025994} OS=Canis familiaris (Dog) PE=4 SV=1	PREDICTED: uncharacterized protein C5orf4 homolog [Ceratotherium simum simum]
gene24150	[I]	Lipid transport and metabolism	Molecular Function: catalytic activity (GO:0003824);; Cellular Component: mitochondrion (GO:0005739);; Biological Process: metabolic process (GO:0008152);;	K01896|0|aml:100475101|ACSM2B; acyl-CoA synthetase medium-chain family member 2B; K01896 medium-chain acyl-CoA synthetase [EC:6.2.1.2] (A)	[I]	Lipid transport and metabolism	Acyl-coenzyme A synthetase ACSM1, mitochondrial (Precursor) GN=ACSM1 OS=Bos taurus (Bovine) PE=1 SV=2	Uncharacterized protein {ECO:0000313|Ensembl:ENSAMEP00000009341} (Fragment) OS=Ailuropoda melanoleuca (Giant panda) PE=4 SV=1	PREDICTED: acyl-coenzyme A synthetase ACSM2B, mitochondrial-like [Leptonychotes weddellii]
gene11115	[I]	Lipid transport and metabolism	Molecular Function: 2-acylglycerol O-acyltransferase activity (GO:0003846);; Molecular Function: diacylglycerol O-acyltransferase activity (GO:0004144);; Cellular Component: endoplasmic reticulum membrane (GO:0005789);; Cellular Component: integral component of membrane (GO:0016021);; Biological Process: triglyceride biosynthetic process (GO:0019432);; Biological Process: lipid storage (GO:001991…	K11155|0|oas:100126245|DGAT1; diacylglycerol O-acyltransferase 1 (EC:2.3.1.20); K11155 diacylglycerol O-acyltransferase 1 [EC:2.3.1.20 2.3.1.75 2.3.1.76] (A)	[I]	Lipid transport and metabolism	Diacylglycerol O-acyltransferase 1 GN=DGAT1 OS=Bos taurus (Bovine) PE=2 SV=2	O-acyltransferase {ECO:0000256|PIRNR:PIRNR000439} OS=Bubalus bubalis (Domestic water buffalo) PE=3 SV=2	diacylglycerol O-acyltransferase 1 [Ovis aries]
gene24508	[I]	Lipid transport and metabolism	Biological Process: long-chain fatty acid metabolic process (GO:0001676);; Molecular Function: catalytic activity (GO:0003824);; Cellular Component: mitochondrion (GO:0005739);; Biological Process: lipid biosynthetic process (GO:0008610);; Biological Process: adiponectin-activated signaling pathway (GO:0033211);; Biological Process: long-chain fatty acid import (GO:0044539);; Biological Process: …	K01897|0|myb:102256273|ACSL1; acyl-CoA synthetase long-chain family member 1; K01897 long-chain acyl-CoA synthetase [EC:6.2.1.3] (A)	[I]	Lipid transport and metabolism	Long-chain-fatty-acid--CoA ligase 3 GN=ACSL3 OS=Pongo abelii (Sumatran orangutan) PE=2 SV=2	Uncharacterized protein {ECO:0000313|Ensembl:ENSMPUP00000011018} OS=Mustela putorius furo (European domestic ferret) PE=4 SV=1	PREDICTED: long-chain-fatty-acid--CoA ligase 1 isoform X3 [Myotis lucifugus]
gene22270	[I]	Lipid transport and metabolism	Molecular Function: acetyl-CoA C-acetyltransferase activity (GO:0003985);; Cellular Component: mitochondrial inner membrane (GO:0005743);; Molecular Function: metal ion binding (GO:0046872);;	K00626|8.61771e-51|ptr:451528|ACAT1; acetyl-CoA acetyltransferase 1; K00626 acetyl-CoA C-acetyltransferase [EC:2.3.1.9] (A)	[I]	Lipid transport and metabolism	Acetyl-CoA acetyltransferase, mitochondrial (Precursor) GN=ACAT1 OS=Bos taurus (Bovine) PE=2 SV=1	Acetyl-Coenzyme A acetyltransferase 1 {ECO:0000313|EMBL:AER93602.1} (Fragment) OS=Mustela putorius furo (European domestic ferret) PE=2 SV=1	PREDICTED: acetyl-CoA acetyltransferase, mitochondrial [Condylura cristata]
gene23196	[I]	Lipid transport and metabolism	--	K05607|3.7708e-71|myd:102773439|AUH; AU RNA binding protein/enoyl-CoA hydratase; K05607 methylglutaconyl-CoA hydratase [EC:4.2.1.18] (A)	[I]	Lipid transport and metabolism	Enoyl-CoA hydratase domain-containing protein 2, mitochondrial (Precursor) GN=ECHDC2 OS=Bos taurus (Bovine) PE=2 SV=1	Uncharacterized protein {ECO:0000313|Ensembl:ENSPPYP00000021702} (Fragment) OS=Pongo abelii (Sumatran orangutan) PE=3 SV=1	PREDICTED: methylglutaconyl-CoA hydratase, mitochondrial-like [Camelus dromedarius]
gene2182	[I]	Lipid transport and metabolism	Molecular Function: phosphatidate cytidylyltransferase activity (GO:0004605);; Cellular Component: endoplasmic reticulum (GO:0005783);; Biological Process: phosphatidylinositol biosynthetic process (GO:0006661);; Cellular Component: integral component of membrane (GO:0016021);; Biological Process: CDP-diacylglycerol biosynthetic process (GO:0016024);;	K00981|5.00568e-105|bom:102286089|CDS1; CDP-diacylglycerol synthase (phosphatidate cytidylyltransferase) 1; K00981 phosphatidate cytidylyltransferase [EC:2.7.7.41] (A)	[I]	Lipid transport and metabolism	Phosphatidate cytidylyltransferase 2 GN=CDS2 OS=Bos taurus (Bovine) PE=1 SV=1	Phosphatidate cytidylyltransferase {ECO:0000256|RuleBase:RU003938} (Fragment) OS=Neovison vison (American mink) PE=2 SV=1	PREDICTED: phosphatidate cytidylyltransferase 1-like, partial [Bubalus bubalis]
gene11778	[I]	Lipid transport and metabolism	Cellular Component: Golgi membrane (GO:0000139);; Molecular Function: diacylglycerol cholinephosphotransferase activity (GO:0004142);; Biological Process: platelet activating factor biosynthetic process (GO:0006663);; Cellular Component: integral component of membrane (GO:0016021);; Molecular Function: metal ion binding (GO:0046872);;	K00994|0|ocu:100353669|CHPT1; choline phosphotransferase 1; K00994 diacylglycerol cholinephosphotransferase [EC:2.7.8.2] (A)	[I]	Lipid transport and metabolism	Cholinephosphotransferase 1 GN=CHPT1 OS=Bos taurus (Bovine) PE=2 SV=1	Cholinephosphotransferase 1 {ECO:0000313|EMBL:ELK10330.1} OS=Pteropus alecto (Black flying fox) PE=3 SV=1	PREDICTED: cholinephosphotransferase 1 isoform 2 [Odobenus rosmarus divergens]
gene1910	[I]	Lipid transport and metabolism	Molecular Function: 3-hydroxyacyl-CoA dehydrogenase activity (GO:0003857);; Molecular Function: receptor binding (GO:0005102);; Cellular Component: nucleus (GO:0005634);; Cellular Component: mitochondrion (GO:0005739);; Biological Process: internal protein amino acid acetylation (GO:0006475);; Biological Process: fatty acid metabolic process (GO:0006631);; Molecular Function: enzyme binding (GO:0…	K07514|0|nle:100586768|EHHADH; enoyl-CoA, hydratase/3-hydroxyacyl CoA dehydrogenase; K07514 enoyl-CoA hydratase / 3-hydroxyacyl-CoA dehydrogenase / 3,2-trans-enoyl-CoA isomerase [EC:4.2.1.17 1.1.1.35 5.3.3.8] (A)	[I]	Lipid transport and metabolism	3-hydroxyacyl-CoA dehydrogenase GN=EHHADH OS=Pongo abelii (Sumatran orangutan) PE=2 SV=1	Uncharacterized protein {ECO:0000313|Ensembl:ENSCAFP00000019481} OS=Canis familiaris (Dog) PE=3 SV=2	PREDICTED: peroxisomal bifunctional enzyme isoform X2 [Canis lupus familiaris]
gene9230	[I]	Lipid transport and metabolism	Molecular Function: catalytic activity (GO:0003824);; Cellular Component: endoplasmic reticulum (GO:0005783);; Cellular Component: Golgi apparatus (GO:0005794);; Cellular Component: lipid particle (GO:0005811);; Molecular Function: protein kinase binding (GO:0019901);; Molecular Function: protein domain specific binding (GO:0019904);; Biological Process: very-low-density lipoprotein particle asse…	K01897|0|tup:102493984|ACSL3; acyl-CoA synthetase long-chain family member 3; K01897 long-chain acyl-CoA synthetase [EC:6.2.1.3] (A)	[I]	Lipid transport and metabolism	Long-chain-fatty-acid--CoA ligase 3 GN=ACSL3 OS=Pongo abelii (Sumatran orangutan) PE=2 SV=2	Uncharacterized protein {ECO:0000313|Ensembl:ENSFCAP00000010960} OS=Felis catus (Cat) PE=4 SV=1	PREDICTED: long-chain-fatty-acid--CoA ligase 3 isoform X1 [Tupaia chinensis]
gene15201	[I]	Lipid transport and metabolism	Molecular Function: catalytic activity (GO:0003824);; Biological Process: metabolic process (GO:0008152);;	--	[I]	Lipid transport and metabolism	Enoyl-CoA hydratase domain-containing protein 2, mitochondrial (Precursor) GN=ECHDC2 OS=Bos taurus (Bovine) PE=2 SV=1	Uncharacterized protein {ECO:0000313|Ensembl:ENSMPUP00000006752} OS=Mustela putorius furo (European domestic ferret) PE=3 SV=1	PREDICTED: enoyl-CoA hydratase domain-containing protein 2, mitochondrial isoform X4 [Mustela putorius furo]
gene11490	[I]	Lipid transport and metabolism	Molecular Function: mevalonate kinase activity (GO:0004496);; Molecular Function: ATP binding (GO:0005524);; Cellular Component: cytosol (GO:0005829);; Biological Process: cholesterol biosynthetic process (GO:0006695);; Biological Process: isoprenoid biosynthetic process (GO:0008299);; Biological Process: phosphorylation (GO:0016310);; Molecular Function: identical protein binding (GO:0042802);; …	K00869|0|aml:100475890|mevalonate kinase-like; K00869 mevalonate kinase [EC:2.7.1.36] (A)	[I]	Lipid transport and metabolism	Mevalonate kinase GN=MVK OS=Bos taurus (Bovine) PE=2 SV=1	Uncharacterized protein {ECO:0000313|Ensembl:ENSAMEP00000017581} (Fragment) OS=Ailuropoda melanoleuca (Giant panda) PE=3 SV=1	PREDICTED: mevalonate kinase isoform 2 [Orcinus orca]
gene8451	[I]	Lipid transport and metabolism	Molecular Function: phosphatidate phosphatase activity (GO:0008195);; Cellular Component: membrane (GO:0016020);; Biological Process: phospholipid dephosphorylation (GO:0046839);;	--	[I]	Lipid transport and metabolism	Lipid phosphate phosphohydrolase 2 GN=PPAP2C OS=Bos taurus (Bovine) PE=2 SV=1	Phosphatidate phosphatase PPAPDC1B isoform 1 {ECO:0000313|EMBL:JAB36330.1} OS=Callithrix jacchus (White-tufted-ear marmoset) PE=2 SV=1	PREDICTED: phosphatidate phosphatase PPAPDC1B [Pteropus alecto]
gene22959	[I]	Lipid transport and metabolism	Molecular Function: phosphatidylserine decarboxylase activity (GO:0004609);; Cellular Component: nucleus (GO:0005634);; Biological Process: phospholipid biosynthetic process (GO:0008654);;	K01613|0|myd:102754521|PISD; phosphatidylserine decarboxylase; K01613 phosphatidylserine decarboxylase [EC:4.1.1.65] (A)	[I]	Lipid transport and metabolism	Phosphatidylserine decarboxylase beta chain GN=PISD OS=Bos taurus (Bovine) PE=2 SV=1	Uncharacterized protein {ECO:0000313|Ensembl:ENSFCAP00000001232} OS=Felis catus (Cat) PE=4 SV=1	PREDICTED: phosphatidylserine decarboxylase proenzyme isoform X2 [Myotis davidii]
gene26292	[I]	Lipid transport and metabolism	--	--	[I]	Lipid transport and metabolism	Short/branched chain specific acyl-CoA dehydrogenase, mitochondrial (Precursor) GN=ACADSB OS=Pongo abelii (Sumatran orangutan) PE=2 SV=1	Short-chain specific acyl-CoA dehydrogenase, mitochondrial {ECO:0000313|EMBL:ELK15538.1} OS=Pteropus alecto (Black flying fox) PE=3 SV=1	PREDICTED: short-chain specific acyl-CoA dehydrogenase, mitochondrial-like [Pantholops hodgsonii]
gene3840	[I]	Lipid transport and metabolism	Biological Process: lipid metabolic process (GO:0006629);; Molecular Function: acetoacetate-CoA ligase activity (GO:0030729);;	K01907|0|bta:505842|AACS; acetoacetyl-CoA synthetase (EC:6.2.1.16); K01907 acetoacetyl-CoA synthetase [EC:6.2.1.16] (A)	[I]	Lipid transport and metabolism	Acetoacetyl-CoA synthetase GN=AACS OS=Macaca fascicularis (Crab-eating macaque) PE=2 SV=1	Uncharacterized protein {ECO:0000313|Ensembl:ENSBTAP00000007459} OS=Bos taurus (Bovine) PE=4 SV=1	acetoacetyl-CoA synthetase [Bos taurus]
gene20447	[I]	Lipid transport and metabolism	Molecular Function: CDP-diacylglycerol-inositol 3-phosphatidyltransferase activity (GO:0003881);; Biological Process: phosphatidylinositol biosynthetic process (GO:0006661);; Cellular Component: membrane (GO:0016020);;	K00999|5.22795e-149|ecb:100065899|CDIPT; CDP-diacylglycerol--inositol 3-phosphatidyltransferase; K00999 CDP-diacylglycerol--inositol 3-phosphatidyltransferase [EC:2.7.8.11] (A)	[I]	Lipid transport and metabolism	--	Uncharacterized protein {ECO:0000313|Ensembl:ENSECAP00000010036} OS=Equus caballus (Horse) PE=3 SV=1	PREDICTED: CDP-diacylglycerol--inositol 3-phosphatidyltransferase [Equus caballus]
gene26869	[I]	Lipid transport and metabolism	Molecular Function: catalytic activity (GO:0003824);; Molecular Function: receptor binding (GO:0005102);; Cellular Component: mitochondrion (GO:0005739);; Biological Process: metabolic process (GO:0008152);;	K12663|4.73005e-55|myb:102263606|ECH1; enoyl CoA hydratase 1, peroxisomal; K12663 delta(3,5)-Delta(2,4)-dienoyl-CoA isomerase [EC:5.3.3.-] (A)	[I]	Lipid transport and metabolism	Delta(3,5)-Delta(2,4)-dienoyl-CoA isomerase, mitochondrial (Precursor) GN=ECH1 OS=Pongo abelii (Sumatran orangutan) PE=2 SV=1	Uncharacterized protein {ECO:0000313|Ensembl:ENSMLUP00000000869} OS=Myotis lucifugus (Little brown bat) PE=3 SV=1	PREDICTED: delta(3,5)-Delta(2,4)-dienoyl-CoA isomerase, mitochondrial [Myotis lucifugus]
gene3956	[I]	Lipid transport and metabolism	Cellular Component: endoplasmic reticulum membrane (GO:0005789);; Biological Process: phosphatidylcholine biosynthetic process (GO:0006656);; Molecular Function: phosphotransferase activity, for other substituted phosphate groups (GO:0016780);;	K13644|0|tup:102499314|CEPT1; choline/ethanolamine phosphotransferase 1; K13644 choline/ethanolamine phosphotransferase [EC:2.7.8.1 2.7.8.2] (A)	[I]	Lipid transport and metabolism	Cholinephosphotransferase 1 GN=CHPT1 OS=Bos taurus (Bovine) PE=2 SV=1	Uncharacterized protein {ECO:0000313|Ensembl:ENSGGOP00000009354} OS=Gorilla gorilla gorilla (Lowland gorilla) PE=3 SV=1	PREDICTED: choline/ethanolaminephosphotransferase 1 isoform X1 [Equus przewalskii]
gene13734	[I]	Lipid transport and metabolism	Molecular Function: farnesyl-diphosphate farnesyltransferase activity (GO:0004310);; Cellular Component: endoplasmic reticulum membrane (GO:0005789);; Biological Process: cholesterol biosynthetic process (GO:0006695);; Biological Process: isoprenoid biosynthetic process (GO:0008299);; Cellular Component: integral component of membrane (GO:0016021);; Molecular Function: oxidoreductase activity (GO…	K00801|0|oas:101119109|FDFT1; farnesyl-diphosphate farnesyltransferase 1; K00801 farnesyl-diphosphate farnesyltransferase [EC:2.5.1.21] (A)	[I]	Lipid transport and metabolism	Squalene synthase GN=FDFT1 OS=Bos taurus (Bovine) PE=2 SV=1	Uncharacterized protein {ECO:0000313|Ensembl:ENSOARP00000016358} OS=Ovis aries (Sheep) PE=4 SV=1	PREDICTED: squalene synthase [Ovis aries]
gene9225	[I]	Lipid transport and metabolism	Biological Process: very long-chain fatty acid metabolic process (GO:0000038);; Biological Process: long-chain fatty acid metabolic process (GO:0001676);; Molecular Function: long-chain fatty acid-CoA ligase activity (GO:0004467);; Molecular Function: ATP binding (GO:0005524);; Cellular Component: endoplasmic reticulum (GO:0005783);; Cellular Component: cytoplasmic membrane-bounded vesicle (GO:00…	K15013|0|ecb:100050272|ACSBG1; acyl-CoA synthetase bubblegum family member 1; K15013 long-chain-fatty-acid--CoA ligase ACSBG [EC:6.2.1.3] (A)	[I]	Lipid transport and metabolism	Long-chain-fatty-acid--CoA ligase ACSBG1 GN=ACSBG1 OS=Macaca fascicularis (Crab-eating macaque) PE=2 SV=2	Long-chain-fatty-acid--CoA ligase ACSBG1 {ECO:0000313|EMBL:EHH63257.1} OS=Macaca fascicularis (Crab-eating macaque) PE=4 SV=1	PREDICTED: LOW QUALITY PROTEIN: long-chain-fatty-acid--CoA ligase ACSBG1 [Equus caballus]
gene20286	[I]	Lipid transport and metabolism	Molecular Function: stearoyl-CoA 9-desaturase activity (GO:0004768);; Molecular Function: iron ion binding (GO:0005506);; Cellular Component: endoplasmic reticulum (GO:0005783);; Biological Process: fatty acid biosynthetic process (GO:0006633);; Cellular Component: integral component of membrane (GO:0016021);; Biological Process: oxidation-reduction process (GO:0055114);;	K00507|0|umr:103677054|SCD; stearoyl-CoA desaturase (delta-9-desaturase); K00507 stearoyl-CoA desaturase (delta-9 desaturase) [EC:1.14.19.1] (A)	[I]	Lipid transport and metabolism	Acyl-CoA desaturase GN=SCD OS=Ovis aries (Sheep) PE=2 SV=1	Uncharacterized protein {ECO:0000313|Ensembl:ENSAMEP00000007110} (Fragment) OS=Ailuropoda melanoleuca (Giant panda) PE=3 SV=1	PREDICTED: acyl-CoA desaturase [Ursus maritimus]
gene13599	[I]	Lipid transport and metabolism	Molecular Function: phosphatidate phosphatase activity (GO:0008195);; Cellular Component: membrane (GO:0016020);; Biological Process: phospholipid dephosphorylation (GO:0046839);;	--	[I]	Lipid transport and metabolism	--	Uncharacterized protein {ECO:0000313|Ensembl:ENSMMUP00000035586} OS=Macaca mulatta (Rhesus macaque) PE=4 SV=1	PREDICTED: phosphatidate phosphatase PPAPDC1A [Odobenus rosmarus divergens]
gene25245	[I]	Lipid transport and metabolism	--	K05605|2.06247e-169|lve:103071603|HIBCH; 3-hydroxyisobutyryl-CoA hydrolase; K05605 3-hydroxyisobutyryl-CoA hydrolase [EC:3.1.2.4] (A)	[I]	Lipid transport and metabolism	3-hydroxyisobutyryl-CoA hydrolase, mitochondrial (Precursor) GN=HIBCH OS=Bos taurus (Bovine) PE=2 SV=1	Uncharacterized protein {ECO:0000313|Ensembl:ENSCAFP00000013923} OS=Canis familiaris (Dog) PE=4 SV=2	PREDICTED: 3-hydroxyisobutyryl-CoA hydrolase, mitochondrial isoform X2 [Lipotes vexillifer]
gene15200	[I]	Lipid transport and metabolism	Molecular Function: receptor binding (GO:0005102);; Cellular Component: nucleus (GO:0005634);; Cellular Component: mitochondrion (GO:0005739);; Cellular Component: peroxisome (GO:0005777);; Biological Process: progesterone biosynthetic process (GO:0006701);; Biological Process: peroxisome organization (GO:0007031);; Molecular Function: phosphatidylinositol transporter activity (GO:0008526);; Mole…	K08764|0|ocu:100008683|SCP2; sterol carrier protein 2 (EC:2.3.1.176); K08764 sterol carrier protein 2 [EC:2.3.1.176] (A)	[I]	Lipid transport and metabolism	Non-specific lipid-transfer protein GN=SCP2 OS=Oryctolagus cuniculus (Rabbit) PE=1 SV=1	Non-specific lipid-transfer protein {ECO:0000313|EMBL:ELK26728.1} OS=Myotis davidii (David's myotis) PE=4 SV=1	non-specific lipid-transfer protein [Oryctolagus cuniculus]
gene13238	[I]	Lipid transport and metabolism	Biological Process: liver development (GO:0001889);; Cellular Component: mitochondrial matrix (GO:0005759);; Biological Process: glycogen biosynthetic process (GO:0005978);; Biological Process: regulation of gluconeogenesis (GO:0006111);; Biological Process: response to cold (GO:0009409);; Biological Process: post-embryonic development (GO:0009791);; Biological Process: carnitine metabolic proces…	K00249|0|ecb:100067343|ACADM; acyl-CoA dehydrogenase, C-4 to C-12 straight chain; K00249 acyl-CoA dehydrogenase [EC:1.3.8.7] (A)	[I]	Lipid transport and metabolism	Medium-chain specific acyl-CoA dehydrogenase, mitochondrial (Precursor) GN=ACADM OS=Bos taurus (Bovine) PE=2 SV=1	Uncharacterized protein {ECO:0000313|Ensembl:ENSECAP00000018743} (Fragment) OS=Equus caballus (Horse) PE=3 SV=1	PREDICTED: medium-chain specific acyl-CoA dehydrogenase, mitochondrial isoform X1 [Equus caballus]
gene17574	[I]	Lipid transport and metabolism	Molecular Function: long-chain fatty acid-CoA ligase activity (GO:0004467);; Cellular Component: mitochondrion (GO:0005739);; Biological Process: neuroblast proliferation (GO:0007405);; Cellular Component: membrane (GO:0016020);; Molecular Function: enzyme binding (GO:0019899);;	K01897|0|ptg:102966851|ACSL6; acyl-CoA synthetase long-chain family member 6; K01897 long-chain acyl-CoA synthetase [EC:6.2.1.3] (A)	[I]	Lipid transport and metabolism	Long-chain-fatty-acid--CoA ligase 3 GN=ACSL3 OS=Pongo abelii (Sumatran orangutan) PE=2 SV=2	Uncharacterized protein {ECO:0000313|Ensembl:ENSCAFP00000001165} OS=Canis familiaris (Dog) PE=4 SV=2	PREDICTED: long-chain-fatty-acid--CoA ligase 6 isoform X1 [Panthera tigris altaica]
gene17985	[I]	Lipid transport and metabolism	Molecular Function: acetyl-CoA hydrolase activity (GO:0003986);; Molecular Function: ATP binding (GO:0005524);; Biological Process: acetyl-CoA metabolic process (GO:0006084);;	K01067|0|oas:101118188|ACOT12; acyl-CoA thioesterase 12; K01067 acetyl-CoA hydrolase [EC:3.1.2.1] (A)	[I]	Lipid transport and metabolism	--	Uncharacterized protein {ECO:0000313|Ensembl:ENSFCAP00000009117} (Fragment) OS=Felis catus (Cat) PE=4 SV=1	PREDICTED: acyl-coenzyme A thioesterase 12 [Ovis aries]
gene11793	[I]	Lipid transport and metabolism	Molecular Function: acetyl-CoA C-acyltransferase activity (GO:0003988);; Cellular Component: mitochondrial inner membrane (GO:0005743);; Biological Process: fatty acid metabolic process (GO:0006631);; Biological Process: negative regulation of apoptotic process (GO:0043066);; Biological Process: negative regulation of mitochondrial outer membrane permeabilization involved in apoptotic signaling p…	K07508|0|ptg:102967396|ACAA2; acetyl-CoA acyltransferase 2; K07508 acetyl-CoA acyltransferase 2 [EC:2.3.1.16] (A)	[I]	Lipid transport and metabolism	3-ketoacyl-CoA thiolase, mitochondrial GN=ACAA2 OS=Bos taurus (Bovine) PE=2 SV=1	Uncharacterized protein {ECO:0000313|Ensembl:ENSMPUP00000000746} OS=Mustela putorius furo (European domestic ferret) PE=3 SV=1	PREDICTED: 3-ketoacyl-CoA thiolase, mitochondrial isoform X1 [Panthera tigris altaica]
gene14933	[I]	Lipid transport and metabolism	Molecular Function: fatty-acyl-CoA binding (GO:0000062);;	--	[I]	Lipid transport and metabolism	Acyl-CoA-binding domain-containing protein 4 GN=ACBD4 OS=Bos taurus (Bovine) PE=2 SV=1	Uncharacterized protein {ECO:0000313|Ensembl:ENSECAP00000016021} OS=Equus caballus (Horse) PE=4 SV=1	PREDICTED: acyl-CoA-binding domain-containing protein 4 isoform 2 [Dasypus novemcinctus]
gene11024	[I]	Lipid transport and metabolism	Molecular Function: fatty-acyl-CoA binding (GO:0000062);; Biological Process: hair follicle development (GO:0001942);; Cellular Component: mitochondrion (GO:0005739);; Cellular Component: peroxisomal membrane (GO:0005778);; Cellular Component: endoplasmic reticulum (GO:0005783);; Cellular Component: Golgi apparatus (GO:0005794);; Biological Process: triglyceride metabolic process (GO:0006641);; B…	K08762|4.36352e-54|ptg:102963871|DBI; diazepam binding inhibitor (GABA receptor modulator, acyl-CoA binding protein); K08762 diazepam-binding inhibitor (GABA receptor modulator, acyl-CoA-binding protein) (A)	[I]	Lipid transport and metabolism	Acyl-CoA-binding protein GN=DBI OS=Canis familiaris (Dog) PE=1 SV=2	Uncharacterized protein {ECO:0000313|Ensembl:ENSECAP00000016516} OS=Equus caballus (Horse) PE=4 SV=1	PREDICTED: acyl-CoA-binding protein [Panthera tigris altaica]
gene13632	[I]	Lipid transport and metabolism	Cellular Component: mitochondrion (GO:0005739);; Molecular Function: CDP-diacylglycerol-glycerol-3-phosphate 3-phosphatidyltransferase activity (GO:0008444);; Biological Process: phospholipid biosynthetic process (GO:0008654);; Cellular Component: integral component of membrane (GO:0016021);;	K08744|1.23645e-114|ptg:102970169|CRLS1; cardiolipin synthase 1; K08744 cardiolipin synthase [EC:2.7.8.-] (A)	[I]	Lipid transport and metabolism	--	Uncharacterized protein {ECO:0000313|Ensembl:ENSAMEP00000011142} (Fragment) OS=Ailuropoda melanoleuca (Giant panda) PE=4 SV=1	PREDICTED: cardiolipin synthase [Erinaceus europaeus]
gene10689	[I]	Lipid transport and metabolism	Molecular Function: transferase activity, transferring alkyl or aryl (other than methyl) groups (GO:0016765);;	K11778|2.19386e-114|aml:100463534|DHDDS; dehydrodolichyl diphosphate synthase; K11778 ditrans,polycis-polyprenyl diphosphate synthase [EC:2.5.1.87] (A)	[I]	Lipid transport and metabolism	--	Uncharacterized protein {ECO:0000313|Ensembl:ENSSSCP00000003859} OS=Sus scrofa (Pig) PE=3 SV=2	PREDICTED: dehydrodolichyl diphosphate syntase complex subunit DHDDS isoform X2 [Loxodonta africana]
gene24399	[I]	Lipid transport and metabolism	--	K01896|1.09304e-71|ggo:101150196|acyl-coenzyme A synthetase ACSM1, mitochondrial-like; K01896 medium-chain acyl-CoA synthetase [EC:6.2.1.2] (A)	[I]	Lipid transport and metabolism	Acyl-coenzyme A synthetase ACSM1, mitochondrial (Precursor) GN=ACSM1 OS=Bos taurus (Bovine) PE=1 SV=2	Uncharacterized protein {ECO:0000313|Ensembl:ENSMMUP00000005650} OS=Macaca mulatta (Rhesus macaque) PE=4 SV=1	PREDICTED: acyl-coenzyme A synthetase ACSM1, mitochondrial-like, partial [Tursiops truncatus]
gene23175	[I]	Lipid transport and metabolism	Molecular Function: diphosphomevalonate decarboxylase activity (GO:0004163);; Molecular Function: ATP binding (GO:0005524);; Cellular Component: cytosol (GO:0005829);; Biological Process: cholesterol biosynthetic process (GO:0006695);; Biological Process: positive regulation of cell proliferation (GO:0008284);; Biological Process: isoprenoid biosynthetic process (GO:0008299);; Molecular Function:…	K01597|0|aml:100482728|diphosphomevalonate decarboxylase-like; K01597 diphosphomevalonate decarboxylase [EC:4.1.1.33] (A)	[I]	Lipid transport and metabolism	Diphosphomevalonate decarboxylase GN=MVD OS=Bos taurus (Bovine) PE=2 SV=1	Uncharacterized protein {ECO:0000313|Ensembl:ENSMLUP00000008095} OS=Myotis lucifugus (Little brown bat) PE=4 SV=1	PREDICTED: diphosphomevalonate decarboxylase [Ceratotherium simum simum]
gene4070	[I]	Lipid transport and metabolism	Biological Process: metabolic process (GO:0008152);; Molecular Function: phosphatidate phosphatase activity (GO:0008195);; Cellular Component: integral component of membrane (GO:0016021);;	K01080|3.338e-177|aml:100475075|lipid phosphate phosphohydrolase 2-like; K01080 phosphatidate phosphatase [EC:3.1.3.4] (A)	[I]	Lipid transport and metabolism	Lipid phosphate phosphohydrolase 2 GN=PPAP2C OS=Bos taurus (Bovine) PE=2 SV=1	Uncharacterized protein {ECO:0000313|Ensembl:ENSMLUP00000017448} OS=Myotis lucifugus (Little brown bat) PE=4 SV=1	PREDICTED: lipid phosphate phosphohydrolase 2 [Myotis lucifugus]
gene14686	[I]	Lipid transport and metabolism	Molecular Function: fatty-acyl-CoA binding (GO:0000062);; Cellular Component: nucleus (GO:0005634);; Cellular Component: cytoplasm (GO:0005737);;	--	[I]	Lipid transport and metabolism	Acyl-CoA-binding domain-containing protein 6 GN=ACBD6 OS=Bos taurus (Bovine) PE=2 SV=1	Uncharacterized protein {ECO:0000313|Ensembl:ENSSSCP00000016470} OS=Sus scrofa (Pig) PE=4 SV=2	PREDICTED: acyl-CoA-binding domain-containing protein 6 isoform X1 [Galeopterus variegatus]
gene20794	[I]	Lipid transport and metabolism	Molecular Function: 1-acylglycerol-3-phosphate O-acyltransferase activity (GO:0003841);; Cellular Component: mitochondrion (GO:0005739);; Biological Process: acylglycerol metabolic process (GO:0006639);;	--	[I]	Lipid transport and metabolism	--	Uncharacterized protein {ECO:0000313|Ensembl:ENSSSCP00000016696} OS=Sus scrofa (Pig) PE=2 SV=1	1-acyl-sn-glycerol-3-phosphate acyltransferase epsilon [Sus scrofa]
gene7601	[I]	Lipid transport and metabolism	Cellular Component: endoplasmic reticulum (GO:0005783);; Biological Process: metabolic process (GO:0008152);; Molecular Function: transferase activity, transferring acyl groups (GO:0016746);;	K13513|0|ecb:100070805|LCLAT1, LYCAT; lysocardiolipin acyltransferase 1; K13513 lysocardiolipin and lysophospholipid acyltransferase [EC:2.3.1.- 2.3.1.51] (A)	[I]	Lipid transport and metabolism	1-acyl-sn-glycerol-3-phosphate acyltransferase gamma GN=AGPAT3 OS=Pongo abelii (Sumatran orangutan) PE=2 SV=1	Uncharacterized protein {ECO:0000313|Ensembl:ENSECAP00000021952} (Fragment) OS=Equus caballus (Horse) PE=4 SV=1	PREDICTED: lysocardiolipin acyltransferase 1 isoform 1 [Ceratotherium simum simum]

## Sheet: Amino acid
#GeneID	COG_class	COG_class_annotation	GO_annotation	KEGG_annotation	KOG_class	KOG_class_annotation	Swissprot_annotation	TrEMBL_annotation	nr_annotation
gene1017	[E]	Amino acid transport and metabolism	Molecular Function: catalytic activity (GO:0003824);; Biological Process: polyamine biosynthetic process (GO:0006596);; Molecular Function: ornithine decarboxylase activator activity (GO:0042978);;	--	[E]	Amino acid transport and metabolism	Antizyme inhibitor 1 GN=AZIN1 OS=Pongo abelii (Sumatran orangutan) PE=2 SV=1	Uncharacterized protein {ECO:0000313|Ensembl:ENSAMEP00000015549} OS=Ailuropoda melanoleuca (Giant panda) PE=3 SV=1	antizyme inhibitor 1 [Camelus ferus]
gene19797	[E]	Amino acid transport and metabolism	Biological Process: proteolysis (GO:0006508);; Molecular Function: metallopeptidase activity (GO:0008237);;	K05604|0|cfa:476165|CNDP1; carnosine dipeptidase 1 (metallopeptidase M20 family); K05604 beta-Ala-His dipeptidase [EC:3.4.13.20] (A)	[E]	Amino acid transport and metabolism	Cytosolic non-specific dipeptidase GN=CNDP2 OS=Bos taurus (Bovine) PE=2 SV=1	Uncharacterized protein {ECO:0000313|Ensembl:ENSCAFP00000000036} OS=Canis familiaris (Dog) PE=4 SV=2	PREDICTED: beta-Ala-His dipeptidase isoform X1 [Canis lupus familiaris]
gene6509	[E]	Amino acid transport and metabolism	Molecular Function: argininosuccinate synthase activity (GO:0004055);; Molecular Function: ATP binding (GO:0005524);; Biological Process: arginine biosynthetic process (GO:0006526);;	K01940|0|umr:103670262|ASS1; argininosuccinate synthase 1; K01940 argininosuccinate synthase [EC:6.3.4.5] (A)	[E]	Amino acid transport and metabolism	Argininosuccinate synthase GN=ASS1 OS=Bos taurus (Bovine) PE=2 SV=1	Uncharacterized protein {ECO:0000313|Ensembl:ENSAMEP00000017086} OS=Ailuropoda melanoleuca (Giant panda) PE=3 SV=1	PREDICTED: argininosuccinate synthase [Ursus maritimus]
gene15989	[E]	Amino acid transport and metabolism	Molecular Function: tryptophan 5-monooxygenase activity (GO:0004510);; Molecular Function: iron ion binding (GO:0005506);; Biological Process: aromatic amino acid family metabolic process (GO:0009072);; Molecular Function: amino acid binding (GO:0016597);; Biological Process: serotonin biosynthetic process (GO:0042427);; Biological Process: bone remodeling (GO:0046849);; Biological Process: oxida…	K00502|0|umr:103679407|TPH1; tryptophan hydroxylase 1; K00502 tryptophan 5-monooxygenase [EC:1.14.16.4] (A)	[E]	Amino acid transport and metabolism	Tryptophan 5-hydroxylase 1 GN=TPH1 OS=Oryctolagus cuniculus (Rabbit) PE=1 SV=2	Uncharacterized protein {ECO:0000313|Ensembl:ENSAMEP00000019237} (Fragment) OS=Ailuropoda melanoleuca (Giant panda) PE=4 SV=1	PREDICTED: tryptophan 5-hydroxylase 1 isoform X1 [Mustela putorius furo]
gene19798	[E]	Amino acid transport and metabolism	Molecular Function: carboxypeptidase activity (GO:0004180);; Cellular Component: cytoplasm (GO:0005737);; Biological Process: proteolysis (GO:0006508);; Molecular Function: metallopeptidase activity (GO:0008237);; Molecular Function: dipeptidase activity (GO:0016805);; Molecular Function: tripeptidase activity (GO:0034701);; Molecular Function: metal ion binding (GO:0046872);;	K08660|0|ecb:100061697|CNDP2; CNDP dipeptidase 2 (metallopeptidase M20 family); K08660 cytosolic nonspecific dipeptidase [EC:3.4.13.18] (A)	[E]	Amino acid transport and metabolism	Cytosolic non-specific dipeptidase GN=CNDP2 OS=Bos taurus (Bovine) PE=2 SV=1	Uncharacterized protein {ECO:0000313|Ensembl:ENSFCAP00000007670} OS=Felis catus (Cat) PE=4 SV=1	PREDICTED: cytosolic non-specific dipeptidase [Bison bison bison]
gene7247	[E]	Amino acid transport and metabolism	Molecular Function: pyrroline-5-carboxylate reductase activity (GO:0004735);; Cellular Component: mitochondrion (GO:0005739);; Biological Process: cellular response to oxidative stress (GO:0034599);; Molecular Function: identical protein binding (GO:0042802);; Biological Process: oxidation-reduction process (GO:0055114);; Biological Process: L-proline biosynthetic process (GO:0055129);;	K00286|0|bacu:103012704|PYCR1; pyrroline-5-carboxylate reductase 1; K00286 pyrroline-5-carboxylate reductase [EC:1.5.1.2] (A)	[E]	Amino acid transport and metabolism	Pyrroline-5-carboxylate reductase 1, mitochondrial GN=PYCR1 OS=Bos taurus (Bovine) PE=2 SV=1	Pyrroline-5-carboxylate reductase {ECO:0000256|RuleBase:RU003903} OS=Camelus ferus (Wild Bactrian camel) PE=3 SV=1	PREDICTED: pyrroline-5-carboxylate reductase 1, mitochondrial isoform X1 [Balaenoptera acutorostrata scammoni]
gene16111	[E]	Amino acid transport and metabolism	Molecular Function: aminomethyltransferase activity (GO:0004047);; Cellular Component: mitochondrion (GO:0005739);; Biological Process: glycine catabolic process (GO:0006546);; Molecular Function: oxidoreductase activity (GO:0016491);; Biological Process: oxidation-reduction process (GO:0055114);;	K17509|0|ecb:100055025|PDPR; pyruvate dehydrogenase phosphatase regulatory subunit; K17509 pyruvate dehydrogenase phosphatase regulatory subunit (A)	[E]	Amino acid transport and metabolism	Pyruvate dehydrogenase phosphatase regulatory subunit, mitochondrial (Precursor) GN=PDPR OS=Bos taurus (Bovine) PE=1 SV=1	Uncharacterized protein {ECO:0000313|Ensembl:ENSECAP00000021232} (Fragment) OS=Equus caballus (Horse) PE=3 SV=1	PREDICTED: pyruvate dehydrogenase phosphatase regulatory subunit, mitochondrial isoformX2 [Equus caballus]
gene19895	[E]	Amino acid transport and metabolism	Biological Process: amino acid transmembrane transport (GO:0003333);; Cellular Component: plasma membrane (GO:0005886);; Molecular Function: amino acid transmembrane transporter activity (GO:0015171);; Cellular Component: integral component of membrane (GO:0016021);;	K14207|0|fca:101083348|SLC38A2; solute carrier family 38, member 2; K14207 solute carrier family 38 (sodium-coupled neutral amino acid transporter), member 2 (A)	[E]	Amino acid transport and metabolism	Sodium-coupled neutral amino acid transporter 2 GN=SLC38A2 OS=Pan paniscus (Pygmy chimpanzee) PE=3 SV=1	Uncharacterized protein {ECO:0000313|Ensembl:ENSFCAP00000016670} OS=Felis catus (Cat) PE=4 SV=1	PREDICTED: sodium-coupled neutral amino acid transporter 2 isoform X1 [Felis catus]
gene265	[E]	Amino acid transport and metabolism	Molecular Function: L-aspartate:2-oxoglutarate aminotransferase activity (GO:0004069);; Cellular Component: mitochondrial inner membrane (GO:0005743);; Cellular Component: mitochondrial matrix (GO:0005759);; Cellular Component: plasma membrane (GO:0005886);; Biological Process: oxaloacetate metabolic process (GO:0006107);; Biological Process: aspartate biosynthetic process (GO:0006532);; Biologic…	K14455|0|umr:103673742|GOT2; glutamic-oxaloacetic transaminase 2, mitochondrial; K14455 aspartate aminotransferase, mitochondrial [EC:2.6.1.1] (A)	[E]	Amino acid transport and metabolism	Aspartate aminotransferase, mitochondrial (Precursor) GN=GOT2 OS=Sus scrofa (Pig) PE=1 SV=2	Aspartate aminotransferase {ECO:0000256|RuleBase:RU000480} OS=Ailuropoda melanoleuca (Giant panda) PE=3 SV=1	PREDICTED: aspartate aminotransferase, mitochondrial [Ursus maritimus]
gene26860	[E]	Amino acid transport and metabolism	Molecular Function: hydrolase activity, acting on carbon-nitrogen (but not peptide) bonds, in linear amidines (GO:0016813);; Molecular Function: metal ion binding (GO:0046872);;	K01480|1.34333e-60|ptg:102966834|AGMAT; agmatine ureohydrolase (agmatinase); K01480 agmatinase [EC:3.5.3.11] (A)	[E]	Amino acid transport and metabolism	Arginase-2, mitochondrial (Precursor) GN=ARG2 OS=Bos taurus (Bovine) PE=2 SV=1	Uncharacterized protein {ECO:0000313|Ensembl:ENSFCAP00000010752} (Fragment) OS=Felis catus (Cat) PE=3 SV=1	PREDICTED: agmatinase, mitochondrial [Dasypus novemcinctus]
gene20428	[E]	Amino acid transport and metabolism	Biological Process: cellular amino acid metabolic process (GO:0006520);; Biological Process: response to toxic substance (GO:0009636);; Molecular Function: carboxy-lyase activity (GO:0016831);; Molecular Function: pyridoxal phosphate binding (GO:0030170);;	K01593|0|ecb:100052557|DDC; dopa decarboxylase (aromatic L-amino acid decarboxylase); K01593 aromatic-L-amino-acid decarboxylase [EC:4.1.1.28] (A)	[E]	Amino acid transport and metabolism	Aromatic-L-amino-acid decarboxylase GN=DDC OS=Sus scrofa (Pig) PE=1 SV=2	Uncharacterized protein {ECO:0000313|Ensembl:ENSECAP00000007803} OS=Equus caballus (Horse) PE=3 SV=1	PREDICTED: aromatic-L-amino-acid decarboxylase isoform X1 [Condylura cristata]
gene11511	[E]	Amino acid transport and metabolism	Biological Process: urea cycle (GO:0000050);; Molecular Function: ornithine carbamoyltransferase activity (GO:0004585);; Cellular Component: mitochondrial inner membrane (GO:0005743);; Cellular Component: mitochondrial matrix (GO:0005759);; Biological Process: arginine biosynthetic process (GO:0006526);; Biological Process: ornithine metabolic process (GO:0006591);; Molecular Function: amino acid…	K00611|0|nle:100607492|OTC; ornithine carbamoyltransferase; K00611 ornithine carbamoyltransferase [EC:2.1.3.3] (A)	[E]	Amino acid transport and metabolism	Ornithine carbamoyltransferase, mitochondrial (Precursor) GN=OTC OS=Bos taurus (Bovine) PE=2 SV=1	Uncharacterized protein {ECO:0000313|Ensembl:ENSNLEP00000001436} OS=Nomascus leucogenys (Northern white-cheeked gibbon) PE=3 SV=1	PREDICTED: ornithine carbamoyltransferase, mitochondrial [Leptonychotes weddellii]
gene7194	[E]	Amino acid transport and metabolism	Molecular Function: proline dehydrogenase activity (GO:0004657);; Cellular Component: mitochondrial inner membrane (GO:0005743);; Biological Process: glutamate biosynthetic process (GO:0006537);; Biological Process: proline catabolic process (GO:0006562);; Biological Process: oxidation-reduction process (GO:0055114);; Molecular Function: FAD binding (GO:0071949);;	K00318|0|cfa:477562|PRODH; proline dehydrogenase (oxidase) 1; K00318 proline dehydrogenase [EC:1.5.-.-] (A)	[E]	Amino acid transport and metabolism	Proline dehydrogenase 1, mitochondrial {ECO:0000250|UniProtKB:O43272} (Precursor) OS=Bos taurus (Bovine) PE=2 SV=1	Uncharacterized protein {ECO:0000313|Ensembl:ENSFCAP00000024846} OS=Felis catus (Cat) PE=4 SV=1	PREDICTED: proline dehydrogenase 1, mitochondrial-like isoform 2 [Odobenus rosmarus divergens]
gene14186	[E]	Amino acid transport and metabolism	Molecular Function: L-histidine transmembrane transporter activity (GO:0005290);; Cellular Component: integral component of plasma membrane (GO:0005887);; Biological Process: glutamine transport (GO:0006868);; Molecular Function: L-glutamine transmembrane transporter activity (GO:0015186);; Biological Process: histidine transport (GO:0015817);;	K13576|0|ssc:100156039|SLC38A3; solute carrier family 38, member 3; K13576 solute carrier family 38 (sodium-coupled neutral amino acid transporter), member 3 (A)	[E]	Amino acid transport and metabolism	Sodium-coupled neutral amino acid transporter 5 GN=SLC38A5 OS=Bos taurus (Bovine) PE=2 SV=1	Uncharacterized protein {ECO:0000313|Ensembl:ENSSSCP00000012150} OS=Sus scrofa (Pig) PE=4 SV=1	PREDICTED: sodium-coupled neutral amino acid transporter 3 isoform X1 [Sus scrofa]
gene12779	[E]	Amino acid transport and metabolism	Biological Process: amino acid transmembrane transport (GO:0003333);; Molecular Function: amino acid transmembrane transporter activity (GO:0015171);; Cellular Component: integral component of membrane (GO:0016021);;	K13868|0|ecb:100056073|SLC7A9; solute carrier family 7 (amino acid transporter light chain, bo,+ system), member 9; K13868 solute carrier family 7 (L-type amino acid transporter), member 9 (A)	[E]	Amino acid transport and metabolism	b(0,+)-type amino acid transporter 1 OS=Oryctolagus cuniculus (Rabbit) PE=1 SV=1	Uncharacterized protein {ECO:0000313|Ensembl:ENSMLUP00000009815} (Fragment) OS=Myotis lucifugus (Little brown bat) PE=4 SV=1	PREDICTED: B(0,+)-type amino acid transporter 1 [Eptesicus fuscus]
gene25905	[E]	Amino acid transport and metabolism	--	K01590|2.07243e-93|ptr:453425|HDC; histidine decarboxylase; K01590 histidine decarboxylase [EC:4.1.1.22] (A)	[E]	Amino acid transport and metabolism	Histidine decarboxylase GN=HDC OS=Bos taurus (Bovine) PE=2 SV=1	Uncharacterized protein {ECO:0000313|Ensembl:ENSGGOP00000005965} OS=Gorilla gorilla gorilla (Lowland gorilla) PE=3 SV=1	PREDICTED: histidine decarboxylase isoform X3 [Oryctolagus cuniculus]
gene753	[E]	Amino acid transport and metabolism	Molecular Function: asparagine synthase (glutamine-hydrolyzing) activity (GO:0004066);; Molecular Function: ATP binding (GO:0005524);; Biological Process: negative regulation of apoptotic process (GO:0043066);; Biological Process: positive regulation of mitotic cell cycle (GO:0045931);; Biological Process: L-asparagine biosynthetic process (GO:0070981);;	K01953|0|cfa:475240|ASNS; asparagine synthetase [glutamine-hydrolyzing]-like; K01953 asparagine synthase (glutamine-hydrolysing) [EC:6.3.5.4] (A)	[E]	Amino acid transport and metabolism	Asparagine synthetase [glutamine-hydrolyzing] GN=ASNS OS=Bos taurus (Bovine) PE=2 SV=3	Asparagine synthetase {ECO:0000256|PIRNR:PIRNR001589} OS=Canis familiaris (Dog) PE=4 SV=2	PREDICTED: asparagine synthetase [glutamine-hydrolyzing]-like isoform X1 [Leptonychotes weddellii]
gene14154	[E]	Amino acid transport and metabolism	Biological Process: regulation of respiratory gaseous exchange by neurological system process (GO:0002087);; Molecular Function: glutaminase activity (GO:0004359);; Biological Process: glutamate biosynthetic process (GO:0006537);; Biological Process: glutamine catabolic process (GO:0006543);; Biological Process: synaptic transmission (GO:0007268);; Biological Process: behavior (GO:0007610);; Biol…	K01425|0|bta:525335|GLS; glutaminase (EC:3.5.1.2); K01425 glutaminase [EC:3.5.1.2] (A)	[E]	Amino acid transport and metabolism	--	Uncharacterized protein {ECO:0000313|Ensembl:ENSBTAP00000010348} OS=Bos taurus (Bovine) PE=3 SV=1	PREDICTED: glutaminase kidney isoform, mitochondrial isoform 2 [Odobenus rosmarus divergens]
gene16894	[E]	Amino acid transport and metabolism	Cellular Component: mitochondrion (GO:0005739);; Molecular Function: transaminase activity (GO:0008483);; Biological Process: glyoxylate catabolic process (GO:0009436);; Biological Process: glycine biosynthetic process, by transamination of glyoxylate (GO:0019265);; Biological Process: L-alanine catabolic process, by transamination (GO:0019481);; Molecular Function: pyridoxal phosphate binding (G…	K00827|0|bacu:103010921|AGXT2; alanine--glyoxylate aminotransferase 2; K00827 alanine-glyoxylate transaminase / (R)-3-amino-2-methylpropionate-pyruvate transaminase [EC:2.6.1.44 2.6.1.40] (A)	[E]	Amino acid transport and metabolism	Alanine--glyoxylate aminotransferase 2, mitochondrial (Precursor) GN=AGXT2 OS=Pongo abelii (Sumatran orangutan) PE=2 SV=1	Alanine--glyoxylate aminotransferase 2, mitochondrial {ECO:0000313|EMBL:CCP73019.1} OS=Neovison vison (American mink) PE=2 SV=1	PREDICTED: alanine--glyoxylate aminotransferase 2, mitochondrial isoform X2 [Camelus bactrianus]
gene1630	[E]	Amino acid transport and metabolism	Molecular Function: threonine-type endopeptidase activity (GO:0004298);; Biological Process: positive regulation of transcription, DNA-templated (GO:0045893);;	K08657|5.50149e-136|pon:100441653|TASP1; taspase, threonine aspartase, 1; K08657 taspase, threonine aspartase, 1 [EC:3.4.25.-] (A)	[E]	Amino acid transport and metabolism	Isoaspartyl peptidase/L-asparaginase beta chain (Precursor) GN=ASRGL1 OS=Macaca fascicularis (Crab-eating macaque) PE=2 SV=1	Uncharacterized protein {ECO:0000313|Ensembl:ENSMLUP00000011890} OS=Myotis lucifugus (Little brown bat) PE=4 SV=1	PREDICTED: threonine aspartase 1, partial [Camelus ferus]
gene26506	[E]	Amino acid transport and metabolism	Molecular Function: hydrolase activity, acting on carbon-nitrogen (but not peptide) bonds, in linear amidines (GO:0016813);; Molecular Function: metal ion binding (GO:0046872);;	K01480|1.37379e-40|ptg:102966834|AGMAT; agmatine ureohydrolase (agmatinase); K01480 agmatinase [EC:3.5.3.11] (A)	[E]	Amino acid transport and metabolism	--	Putative uncharacterized protein {ECO:0000313|EMBL:EFB21823.1} (Fragment) OS=Ailuropoda melanoleuca (Giant panda) PE=3 SV=1	PREDICTED: agmatinase, mitochondrial [Panthera tigris altaica]
gene12751	[E]	Amino acid transport and metabolism	Molecular Function: D-amino-acid oxidase activity (GO:0003884);; Molecular Function: receptor binding (GO:0005102);; Cellular Component: peroxisome (GO:0005777);; Biological Process: aspartate catabolic process (GO:0006533);; Biological Process: insemination (GO:0007320);; Biological Process: grooming behavior (GO:0007625);; Molecular Function: D-aspartate oxidase activity (GO:0008445);; Biologic…	K00272|0|ecb:100072326|DDO; D-aspartate oxidase; K00272 D-aspartate oxidase [EC:1.4.3.1] (A)	[E]	Amino acid transport and metabolism	D-aspartate oxidase GN=DDO OS=Bos taurus (Bovine) PE=1 SV=2	Putative uncharacterized protein {ECO:0000313|EMBL:EFB28036.1} (Fragment) OS=Ailuropoda melanoleuca (Giant panda) PE=4 SV=1	PREDICTED: D-aspartate oxidase [Ceratotherium simum simum]
gene1242	[E]	Amino acid transport and metabolism	Molecular Function: arginase activity (GO:0004053);; Biological Process: arginine metabolic process (GO:0006525);; Molecular Function: metal ion binding (GO:0046872);;	K01476|0|pale:102897985|ARG1; arginase 1; K01476 arginase [EC:3.5.3.1] (A)	[E]	Amino acid transport and metabolism	Arginase-1 GN=ARG1 OS=Sus scrofa (Pig) PE=2 SV=1	Arginase {ECO:0000256|RuleBase:RU361159} (Fragment) OS=Felis catus (Cat) PE=3 SV=1	PREDICTED: arginase-1 isoform X1 [Pteropus alecto]
gene21897	[E]	Amino acid transport and metabolism	Molecular Function: gamma-glutamyltransferase activity (GO:0003840);; Cellular Component: plasma membrane (GO:0005886);; Biological Process: glutathione metabolic process (GO:0006749);; Biological Process: inflammatory response (GO:0006954);; Biological Process: leukotriene biosynthetic process (GO:0019370);;	K18592|0|pale:102884483|GGT5; gamma-glutamyltransferase 5; K18592 gamma-glutamyltranspeptidase / glutathione hydrolase / leukotriene-C4 hydrolase [EC:2.3.2.2 3.4.19.13 3.4.19.14] (A)	[E]	Amino acid transport and metabolism	Gamma-glutamyltranspeptidase 1 light chain (Precursor) GN=GGT1 OS=Sus scrofa (Pig) PE=2 SV=1	Gamma-glutamyltransferase 5 {ECO:0000313|EMBL:ELK15612.1} OS=Pteropus alecto (Black flying fox) PE=4 SV=1	PREDICTED: gamma-glutamyltransferase 5 isoform X3 [Equus caballus]
gene16231	[E]	Amino acid transport and metabolism	Molecular Function: glutamate decarboxylase activity (GO:0004351);; Molecular Function: glutamate-ammonia ligase activity (GO:0004356);; Molecular Function: ATP binding (GO:0005524);; Cellular Component: mitochondrion (GO:0005739);; Biological Process: glutamine biosynthetic process (GO:0006542);;	K01915|0|ptg:102962409|GLUL; glutamate-ammonia ligase; K01915 glutamine synthetase [EC:6.3.1.2] (A)	[E]	Amino acid transport and metabolism	Glutamine synthetase GN=GLUL OS=Canis familiaris (Dog) PE=1 SV=3	Glutamine synthetase {ECO:0000256|RuleBase:RU004356} (Fragment) OS=Pongo abelii (Sumatran orangutan) PE=3 SV=2	PREDICTED: glutamine synthetase-like isoform 1 [Odobenus rosmarus divergens]
gene5316	[E]	Amino acid transport and metabolism	Cellular Component: mitochondrion (GO:0005739);; Biological Process: 2-oxoglutarate metabolic process (GO:0006103);; Biological Process: biosynthetic process (GO:0009058);; Molecular Function: kynurenine-oxoglutarate transaminase activity (GO:0016212);; Molecular Function: pyridoxal phosphate binding (GO:0030170);; Molecular Function: protein homodimerization activity (GO:0042803);; Molecular Fun…	K00816|0|ptg:102960707|CCBL2; cysteine conjugate-beta lyase 2; K00816 kynurenine---oxoglutarate transaminase / cysteine-S-conjugate beta-lyase / glutamine---phenylpyruvate transaminase [EC:2.6.1.7 4.4.1.13 2.6.1.64] (A)	[E]	Amino acid transport and metabolism	Kynurenine--oxoglutarate transaminase 3 GN=CCBL2 OS=Bos taurus (Bovine) PE=2 SV=1	Uncharacterized protein {ECO:0000313|Ensembl:ENSFCAP00000007280} OS=Felis catus (Cat) PE=4 SV=1	PREDICTED: kynurenine--oxoglutarate transaminase 3 isoform X1 [Panthera tigris altaica]
gene24376	[E]	Amino acid transport and metabolism	Cellular Component: mitochondrion (GO:0005739);; Biological Process: cellular amino acid metabolic process (GO:0006520);; Molecular Function: pyridoxal phosphate binding (GO:0030170);;	K17989|6.91484e-170|ecb:100056350|SDSL; serine dehydratase-like; K17989 L-serine/L-threonine ammonia-lyase [EC:4.3.1.17 4.3.1.19] (A)	[E]	Amino acid transport and metabolism	L-serine dehydratase/L-threonine deaminase GN=SDS OS=Bos taurus (Bovine) PE=2 SV=1	Putative threonine/serine dehydratase {ECO:0000313|EMBL:JAA51435.1} (Fragment) OS=Desmodus rotundus (Vampire bat) PE=2 SV=1	PREDICTED: serine dehydratase-like [Orcinus orca]
gene25541	[E]	Amino acid transport and metabolism	Molecular Function: aminomethyltransferase activity (GO:0004047);; Cellular Component: mitochondrion (GO:0005739);; Biological Process: glycine catabolic process (GO:0006546);; Molecular Function: oxidoreductase activity (GO:0016491);; Biological Process: oxidation-reduction process (GO:0055114);;	K00314|0|cfa:491277|SARDH; sarcosine dehydrogenase; K00314 sarcosine dehydrogenase [EC:1.5.8.3] (A)	[E]	Amino acid transport and metabolism	Pyruvate dehydrogenase phosphatase regulatory subunit, mitochondrial (Precursor) GN=PDPR OS=Bos taurus (Bovine) PE=1 SV=1	Uncharacterized protein {ECO:0000313|Ensembl:ENSCAFP00000029306} OS=Canis familiaris (Dog) PE=3 SV=2	PREDICTED: sarcosine dehydrogenase, mitochondrial isoform X3 [Canis lupus familiaris]
gene22015	[E]	Amino acid transport and metabolism	Biological Process: amino acid transmembrane transport (GO:0003333);; Molecular Function: neutral amino acid transmembrane transporter activity (GO:0015175);; Cellular Component: integral component of membrane (GO:0016021);; Biological Process: D-alanine transport (GO:0042941);; Biological Process: D-serine transport (GO:0042942);;	K13782|0|cjc:100406929|SLC7A10; solute carrier family 7 (neutral amino acid transporter light chain, asc system), member 10; K13782 solute carrier family 7 (L-type amino acid transporter), member 10 (A)	[E]	Amino acid transport and metabolism	Large neutral amino acids transporter small subunit 2 OS=Oryctolagus cuniculus (Rabbit) PE=1 SV=1	Uncharacterized protein {ECO:0000313|Ensembl:ENSCAFP00000011039} (Fragment) OS=Canis familiaris (Dog) PE=4 SV=2	PREDICTED: asc-type amino acid transporter 1 isoform X2 [Bison bison bison]
gene12637	[E]	Amino acid transport and metabolism	Biological Process: ureteric bud development (GO:0001657);; Molecular Function: arginase activity (GO:0004053);; Cellular Component: mitochondrion (GO:0005739);; Biological Process: arginine metabolic process (GO:0006525);; Biological Process: striated muscle contraction (GO:0006941);; Molecular Function: metal ion binding (GO:0046872);;	K01476|0|ssc:100155893|ARG2; arginase 2; K01476 arginase [EC:3.5.3.1] (A)	[E]	Amino acid transport and metabolism	Arginase-2, mitochondrial (Precursor) GN=ARG2 OS=Bos taurus (Bovine) PE=2 SV=1	Arginase {ECO:0000256|RuleBase:RU361159} OS=Sus scrofa (Pig) PE=3 SV=1	PREDICTED: arginase-2, mitochondrial isoform X1 [Canis lupus familiaris]
gene16673	[E]	Amino acid transport and metabolism	Molecular Function: magnesium ion binding (GO:0000287);; Molecular Function: phosphoserine phosphatase activity (GO:0004647);; Molecular Function: calcium ion binding (GO:0005509);; Biological Process: L-serine biosynthetic process (GO:0006564);; Biological Process: dephosphorylation (GO:0016311);; Molecular Function: protein homodimerization activity (GO:0042803);;	K01079|5.57618e-162|fca:101082200|PSPH; phosphoserine phosphatase; K01079 phosphoserine phosphatase [EC:3.1.3.3] (A)	[E]	Amino acid transport and metabolism	Phosphoserine phosphatase GN=PSPH OS=Bos taurus (Bovine) PE=2 SV=1	Uncharacterized protein {ECO:0000313|Ensembl:ENSCAFP00000014881} (Fragment) OS=Canis familiaris (Dog) PE=4 SV=2	PREDICTED: phosphoserine phosphatase isoform X4 [Felis catus]
gene19971	[E]	Amino acid transport and metabolism	Molecular Function: glutamate dehydrogenase (NAD+) activity (GO:0004352);; Molecular Function: glutamate dehydrogenase [NAD(P)+] activity (GO:0004353);; Molecular Function: ATP binding (GO:0005524);; Molecular Function: GTP binding (GO:0005525);; Cellular Component: mitochondrial inner membrane (GO:0005743);; Cellular Component: mitochondrial matrix (GO:0005759);; Biological Process: glutamate ca…	K00261|0|mmu:14661|Glud1, AI118167, Gdh-X, Glud, Gludl; glutamate dehydrogenase 1 (EC:1.4.1.3); K00261 glutamate dehydrogenase (NAD(P)+) [EC:1.4.1.3] (A)	[E]	Amino acid transport and metabolism	Glutamate dehydrogenase 1, mitochondrial (Precursor) GN=GLUD1 OS=Bos taurus (Bovine) PE=1 SV=2	Glutamate dehydrogenase 1, mitochondrial {ECO:0000313|Ensembl:ENSSSCP00000011056} OS=Sus scrofa (Pig) PE=3 SV=1	PREDICTED: glutamate dehydrogenase 1, mitochondrial [Lipotes vexillifer]
gene10317	[E]	Amino acid transport and metabolism	Molecular Function: phenylalanine 4-monooxygenase activity (GO:0004505);; Molecular Function: iron ion binding (GO:0005506);; Biological Process: L-phenylalanine catabolic process (GO:0006559);; Molecular Function: amino acid binding (GO:0016597);; Biological Process: oxidation-reduction process (GO:0055114);;	K00500|0|lve:103079765|PAH; phenylalanine hydroxylase; K00500 phenylalanine-4-hydroxylase [EC:1.14.16.1] (A)	[E]	Amino acid transport and metabolism	Phenylalanine-4-hydroxylase GN=PAH OS=Bos taurus (Bovine) PE=2 SV=1	Uncharacterized protein {ECO:0000313|Ensembl:ENSECAP00000016899} OS=Equus caballus (Horse) PE=4 SV=1	PREDICTED: phenylalanine-4-hydroxylase [Lipotes vexillifer]
gene21054	[E]	Amino acid transport and metabolism	Biological Process: negative regulation of transcription from RNA polymerase II promoter (GO:0000122);; Molecular Function: transcription corepressor activity (GO:0003714);; Cellular Component: nucleus (GO:0005634);; Cellular Component: mitochondrion (GO:0005739);; Cellular Component: plasma membrane (GO:0005886);; Biological Process: sensory perception of sound (GO:0007605);; Biological Process:…	K18258|0|cfa:479818|CRYM; crystallin, mu; K18258 thiomorpholine-carboxylate dehydrogenase [EC:1.5.1.25] (A)	[E]	Amino acid transport and metabolism	Ketimine reductase mu-crystallin GN=CRYM OS=Bos taurus (Bovine) PE=2 SV=1	Uncharacterized protein {ECO:0000313|Ensembl:ENSCAFP00000026272} OS=Canis familiaris (Dog) PE=4 SV=1	PREDICTED: thiomorpholine-carboxylate dehydrogenase [Odobenus rosmarus divergens]
gene8608	[E]	Amino acid transport and metabolism	Biological Process: amino acid transmembrane transport (GO:0003333);; Molecular Function: amino acid transmembrane transporter activity (GO:0015171);; Cellular Component: integral component of membrane (GO:0016021);;	--	[E]	Amino acid transport and metabolism	Cationic amino acid transporter 2 GN=SLC7A2 OS=Sus scrofa (Pig) PE=2 SV=1	Uncharacterized protein {ECO:0000313|Ensembl:ENSAMEP00000019100} OS=Ailuropoda melanoleuca (Giant panda) PE=4 SV=1	PREDICTED: cationic amino acid transporter 3-like [Odobenus rosmarus divergens]
gene21896	[E]	Amino acid transport and metabolism	Biological Process: regulation of immune system process (GO:0002682);; Molecular Function: gamma-glutamyltransferase activity (GO:0003840);; Biological Process: glutathione biosynthetic process (GO:0006750);; Biological Process: spermatogenesis (GO:0007283);; Biological Process: cysteine biosynthetic process (GO:0019344);; Biological Process: regulation of inflammatory response (GO:0050727);;	K18592|0|cfr:102519525|GGT1; gamma-glutamyltransferase 1; K18592 gamma-glutamyltranspeptidase / glutathione hydrolase / leukotriene-C4 hydrolase [EC:2.3.2.2 3.4.19.13 3.4.19.14] (A)	[E]	Amino acid transport and metabolism	Gamma-glutamyltranspeptidase 1 light chain (Precursor) GN=GGT1 OS=Sus scrofa (Pig) PE=2 SV=1	Uncharacterized protein {ECO:0000313|Ensembl:ENSAMEP00000014659} (Fragment) OS=Ailuropoda melanoleuca (Giant panda) PE=4 SV=1	PREDICTED: gamma-glutamyltranspeptidase 1 [Camelus bactrianus]
gene26181	[E]	Amino acid transport and metabolism	--	K18258|2.76542e-10|bfo:BRAFLDRAFT_276807|hypothetical protein; K18258 thiomorpholine-carboxylate dehydrogenase [EC:1.5.1.25] (A)	[E]	Amino acid transport and metabolism	--	--	--
gene19883	[E]	Amino acid transport and metabolism	Biological Process: cellular amino acid metabolic process (GO:0006520);; Molecular Function: transaminase activity (GO:0008483);; Biological Process: biosynthetic process (GO:0009058);; Molecular Function: pyridoxal phosphate binding (GO:0030170);;	--	[E]	Amino acid transport and metabolism	Putative aspartate aminotransferase, cytoplasmic 2 GN=GOT1L1 OS=Bos taurus (Bovine) PE=2 SV=1	Putative aspartate aminotransferase, cytoplasmic 2 {ECO:0000313|EMBL:ELK08761.1} OS=Pteropus alecto (Black flying fox) PE=4 SV=1	PREDICTED: putative aspartate aminotransferase, cytoplasmic 2 [Pteropus alecto]
gene12288	[E]	Amino acid transport and metabolism	Molecular Function: glutamate decarboxylase activity (GO:0004351);; Cellular Component: intracellular (GO:0005622);; Biological Process: carboxylic acid metabolic process (GO:0019752);; Molecular Function: pyridoxal phosphate binding (GO:0030170);; Biological Process: neurotransmitter biosynthetic process (GO:0042136);;	K01580|0|fca:493699|GAD1; glutamate decarboxylase 1 (brain, 67kDa) (EC:4.1.1.15); K01580 glutamate decarboxylase [EC:4.1.1.15] (A)	[E]	Amino acid transport and metabolism	Glutamate decarboxylase 1 GN=GAD1 OS=Felis catus (Cat) PE=2 SV=3	Uncharacterized protein {ECO:0000313|Ensembl:ENSECAP00000011080} OS=Equus caballus (Horse) PE=3 SV=1	glutamate decarboxylase 1 [Felis catus]
gene610	[E]	Amino acid transport and metabolism	Molecular Function: metallocarboxypeptidase activity (GO:0004181);; Cellular Component: cytosol (GO:0005829);; Biological Process: proteolysis (GO:0006508);; Molecular Function: zinc ion binding (GO:0008270);; Molecular Function: tubulin binding (GO:0015631);; Biological Process: C-terminal protein deglutamylation (GO:0035609);; Biological Process: protein side chain deglutamylation (GO:0035610);;	--	[E]	Amino acid transport and metabolism	Cytosolic carboxypeptidase 2 GN=AGBL2 OS=Macaca fascicularis (Crab-eating macaque) PE=2 SV=1	Cytosolic carboxypeptidase 6 {ECO:0000313|EMBL:CCP87734.1} (Fragment) OS=Neovison vison (American mink) PE=2 SV=1	PREDICTED: cytosolic carboxypeptidase 6-like [Mustela putorius furo]
gene4691	[E]	Amino acid transport and metabolism	Biological Process: endochondral ossification (GO:0001958);; Biological Process: blood vessel remodeling (GO:0001974);; Molecular Function: cystathionine beta-synthase activity (GO:0004122);; Cellular Component: nucleolus (GO:0005730);; Cellular Component: cytosol (GO:0005829);; Biological Process: cysteine biosynthetic process from serine (GO:0006535);; Biological Process: L-serine catabolic pro…	K01697|0|fca:101093038|CBS; cystathionine-beta-synthase; K01697 cystathionine beta-synthase [EC:4.2.1.22] (A)	[E]	Amino acid transport and metabolism	Cystathionine beta-synthase GN=CBS OS=Macaca fascicularis (Crab-eating macaque) PE=2 SV=3	Cystathionine beta-synthase {ECO:0000256|RuleBase:RU361204} (Fragment) OS=Ailuropoda melanoleuca (Giant panda) PE=3 SV=1	PREDICTED: cystathionine beta-synthase isoform 1 [Odobenus rosmarus divergens]
gene4323	[E]	Amino acid transport and metabolism	Molecular Function: glutaminase activity (GO:0004359);; Cellular Component: mitochondrion (GO:0005739);; Biological Process: glutamine metabolic process (GO:0006541);; Biological Process: regulation of apoptotic process (GO:0042981);; Biological Process: reactive oxygen species metabolic process (GO:0072593);;	K01425|0|pale:102880654|GLS2; glutaminase 2 (liver, mitochondrial); K01425 glutaminase [EC:3.5.1.2] (A)	[E]	Amino acid transport and metabolism	--	Glutaminase liver isoform, mitochondrial {ECO:0000313|EMBL:ELK15288.1} OS=Pteropus alecto (Black flying fox) PE=3 SV=1	PREDICTED: glutaminase liver isoform, mitochondrial isoform X1 [Orycteropus afer afer]
gene11540	[E]	Amino acid transport and metabolism	Molecular Function: glycine dehydrogenase (decarboxylating) activity (GO:0004375);; Cellular Component: mitochondrion (GO:0005739);; Biological Process: glycine catabolic process (GO:0006546);; Molecular Function: lyase activity (GO:0016829);; Molecular Function: pyridoxal phosphate binding (GO:0030170);; Biological Process: oxidation-reduction process (GO:0055114);;	K00281|0|aml:100472555|glycine dehydrogenase [decarboxylating], mitochondrial-like; K00281 glycine dehydrogenase [EC:1.4.4.2] (A)	[E]	Amino acid transport and metabolism	--	Glycine dehydrogenase decarboxylating, mitochondrial {ECO:0000313|EMBL:CCP79720.1} (Fragment) OS=Neovison vison (American mink) PE=2 SV=1	PREDICTED: glycine dehydrogenase [decarboxylating], mitochondrial [Mustela putorius furo]
gene25117	[E]	Amino acid transport and metabolism	Cellular Component: cytoplasm (GO:0005737);; Biological Process: amino-acid betaine catabolic process (GO:0006579);; Molecular Function: zinc ion binding (GO:0008270);; Molecular Function: S-adenosylmethionine-homocysteine S-methyltransferase activity (GO:0008898);; Biological Process: methionine biosynthetic process (GO:0009086);; Molecular Function: betaine-homocysteine S-methyltransferase acti…	K00544|0|fca:101085179|BHMT; betaine--homocysteine S-methyltransferase; K00544 betaine-homocysteine S-methyltransferase [EC:2.1.1.5] (A)	[E]	Amino acid transport and metabolism	Betaine--homocysteine S-methyltransferase 1 GN=BHMT OS=Bos taurus (Bovine) PE=2 SV=1	Uncharacterized protein {ECO:0000313|Ensembl:ENSFCAP00000024440} OS=Felis catus (Cat) PE=4 SV=1	PREDICTED: betaine--homocysteine S-methyltransferase 1 isoform X2 [Mustela putorius furo]
gene23434	[E]	Amino acid transport and metabolism	Molecular Function: D-amino-acid oxidase activity (GO:0003884);; Molecular Function: receptor binding (GO:0005102);; Cellular Component: mitochondrial outer membrane (GO:0005741);; Cellular Component: peroxisomal membrane (GO:0005778);; Cellular Component: cytosol (GO:0005829);; Biological Process: leucine metabolic process (GO:0006551);; Biological Process: proline catabolic process (GO:0006562)…	K00273|0|myb:102240841|DAO; D-amino-acid oxidase; K00273 D-amino-acid oxidase [EC:1.4.3.3] (A)	[E]	Amino acid transport and metabolism	D-amino-acid oxidase GN=DAO OS=Sus scrofa (Pig) PE=1 SV=2	D-amino-acid oxidase {ECO:0000313|EMBL:ELK03906.1} OS=Pteropus alecto (Black flying fox) PE=4 SV=1	D-amino-acid oxidase [Pteropus alecto]
gene3168	[E]	Amino acid transport and metabolism	Molecular Function: spermidine synthase activity (GO:0004766);; Biological Process: metabolic process (GO:0008152);; Molecular Function: protein homodimerization activity (GO:0042803);;	K00797|0|bta:505916|SRM; spermidine synthase; K00797 spermidine synthase [EC:2.5.1.16] (A)	[E]	Amino acid transport and metabolism	--	Uncharacterized protein {ECO:0000313|Ensembl:ENSOGAP00000012234} OS=Otolemur garnettii (Small-eared galago) PE=3 SV=1	PREDICTED: spermidine synthase [Camelus dromedarius]
gene24375	[E]	Amino acid transport and metabolism	Molecular Function: L-serine ammonia-lyase activity (GO:0003941);; Molecular Function: L-threonine ammonia-lyase activity (GO:0004794);; Cellular Component: mitochondrion (GO:0005739);; Biological Process: gluconeogenesis (GO:0006094);; Biological Process: L-serine catabolic process (GO:0006565);; Molecular Function: pyridoxal phosphate binding (GO:0030170);; Molecular Function: protein homodimer…	K17989|0|fca:101086928|SDS; serine dehydratase; K17989 L-serine/L-threonine ammonia-lyase [EC:4.3.1.17 4.3.1.19] (A)	[E]	Amino acid transport and metabolism	L-serine dehydratase/L-threonine deaminase GN=SDS OS=Bos taurus (Bovine) PE=2 SV=1	Uncharacterized protein {ECO:0000313|Ensembl:ENSMPUP00000002615} OS=Mustela putorius furo (European domestic ferret) PE=4 SV=1	PREDICTED: L-serine dehydratase/L-threonine deaminase [Leptonychotes weddellii]
gene10311	[E]	Amino acid transport and metabolism	Molecular Function: carboxy-lyase activity (GO:0016831);; Biological Process: carboxylic acid metabolic process (GO:0019752);; Molecular Function: pyridoxal phosphate binding (GO:0030170);;	--	[E]	Amino acid transport and metabolism	Pyridoxal-dependent decarboxylase domain-containing protein 1 GN=PDXDC1 OS=Bos taurus (Bovine) PE=2 SV=1	Uncharacterized protein {ECO:0000313|Ensembl:ENSCAFP00000027685} OS=Canis familiaris (Dog) PE=3 SV=2	PREDICTED: pyridoxal-dependent decarboxylase domain-containing protein 1 isoform 1 [Ceratotherium simum simum]
gene5794	[E]	Amino acid transport and metabolism	Biological Process: amino acid transmembrane transport (GO:0003333);; Biological Process: negative regulation of phosphatase activity (GO:0010923);; Molecular Function: amino acid transmembrane transporter activity (GO:0015171);; Cellular Component: integral component of membrane (GO:0016021);;	K13871|0|mcc:696121|SLC7A14; solute carrier family 7 (orphan transporter), member 14; K13871 solute carrier family 7 (cationic amino acid transporter), member 14 (A)	[E]	Amino acid transport and metabolism	Probable cationic amino acid transporter GN=SLC7A14 OS=Bos taurus (Bovine) PE=2 SV=1	Putative uncharacterized protein {ECO:0000313|EMBL:EHH51510.1} OS=Macaca fascicularis (Crab-eating macaque) PE=4 SV=1	PREDICTED: probable cationic amino acid transporter [Mustela putorius furo]
gene15105	[E]	Amino acid transport and metabolism	--	--	[E]	Amino acid transport and metabolism	Threonine synthase-like 1 GN=THNSL1 OS=Macaca fascicularis (Crab-eating macaque) PE=2 SV=1	Uncharacterized protein {ECO:0000313|Ensembl:ENSECAP00000007256} OS=Equus caballus (Horse) PE=3 SV=1	PREDICTED: threonine synthase-like 1 isoform X1 [Equus caballus]
gene26242	[E]	Amino acid transport and metabolism	--	--	[E]	Amino acid transport and metabolism	--	--	PREDICTED: glutamate synthase 1 [NADH], chloroplastic-like [Pantholops hodgsonii]
gene26296	[E]	Amino acid transport and metabolism	--	--	[E]	Amino acid transport and metabolism	--	--	PREDICTED: 3-isopropylmalate dehydratase-like [Pantholops hodgsonii]
gene25894	[E]	Amino acid transport and metabolism	--	K14677|0|ptg:102948715|ACY1; aminoacylase 1; K14677 aminoacylase [EC:3.5.1.14] (A)	[E]	Amino acid transport and metabolism	Aminoacylase-1 GN=ACY1 OS=Sus scrofa (Pig) PE=1 SV=2	Aminoacylase-1 {ECO:0000256|PIRNR:PIRNR036696} OS=Mustela putorius furo (European domestic ferret) PE=3 SV=1	PREDICTED: aminoacylase-1 isoform X1 [Panthera tigris altaica]
gene11006	[E]	Amino acid transport and metabolism	Molecular Function: argininosuccinate synthase activity (GO:0004055);; Molecular Function: ATP binding (GO:0005524);; Biological Process: arginine biosynthetic process (GO:0006526);;	K01940|1.24733e-55|cge:100762274|Ass1; argininosuccinate synthase 1; K01940 argininosuccinate synthase [EC:6.3.4.5] (A)	[E]	Amino acid transport and metabolism	Argininosuccinate synthase GN=ASS1 OS=Bos taurus (Bovine) PE=2 SV=1	Argininosuccinate synthetase 1 {ECO:0000313|EMBL:AAS55911.1} (Fragment) OS=Sus scrofa (Pig) PE=2 SV=1	argininosuccinate synthetase 1, partial [Sus scrofa]
gene10794	[E]	Amino acid transport and metabolism	Molecular Function: metallocarboxypeptidase activity (GO:0004181);; Biological Process: proteolysis (GO:0006508);; Molecular Function: zinc ion binding (GO:0008270);;	--	[E]	Amino acid transport and metabolism	Cytosolic carboxypeptidase 3 GN=AGBL3 OS=Bos taurus (Bovine) PE=3 SV=1	Uncharacterized protein {ECO:0000313|Ensembl:ENSECAP00000005396} OS=Equus caballus (Horse) PE=4 SV=1	PREDICTED: cytosolic carboxypeptidase 4 isoform X2 [Equus caballus]
gene19228	[E]	Amino acid transport and metabolism	Molecular Function: transporter activity (GO:0005215);; Biological Process: oligopeptide transport (GO:0006857);; Cellular Component: integral component of membrane (GO:0016021);;	K14638|0|fca:101082776|SLC15A3; solute carrier family 15 (oligopeptide transporter), member 3; K14638 solute carrier family 15 (peptide/histidine transporter), member 3/4 (A)	[E]	Amino acid transport and metabolism	Solute carrier family 15 member 4 GN=SLC15A4 OS=Bos taurus (Bovine) PE=2 SV=2	Uncharacterized protein {ECO:0000313|Ensembl:ENSMPUP00000014281} (Fragment) OS=Mustela putorius furo (European domestic ferret) PE=4 SV=1	PREDICTED: solute carrier family 15 member 3 [Odobenus rosmarus divergens]
gene21751	[E]	Amino acid transport and metabolism	Molecular Function: L-tyrosine:2-oxoglutarate aminotransferase activity (GO:0004838);; Cellular Component: mitochondrion (GO:0005739);; Biological Process: 2-oxoglutarate metabolic process (GO:0006103);; Biological Process: glutamate metabolic process (GO:0006536);; Biological Process: tyrosine catabolic process (GO:0006572);; Biological Process: biosynthetic process (GO:0009058);; Molecular Func…	K00815|0|cfa:479665|TAT; tyrosine aminotransferase; K00815 tyrosine aminotransferase [EC:2.6.1.5] (A)	[E]	Amino acid transport and metabolism	Tyrosine aminotransferase GN=TAT OS=Bos taurus (Bovine) PE=2 SV=1	Putative uncharacterized protein {ECO:0000313|EMBL:EFB27053.1} (Fragment) OS=Ailuropoda melanoleuca (Giant panda) PE=3 SV=1	PREDICTED: tyrosine aminotransferase [Odobenus rosmarus divergens]
gene24907	[E]	Amino acid transport and metabolism	Molecular Function: glutamate-ammonia ligase activity (GO:0004356);; Biological Process: glutamine biosynthetic process (GO:0006542);;	--	[E]	Amino acid transport and metabolism	Lengsin GN=LGSN OS=Canis familiaris (Dog) PE=2 SV=1	Uncharacterized protein {ECO:0000313|Ensembl:ENSMPUP00000003083} OS=Mustela putorius furo (European domestic ferret) PE=3 SV=1	PREDICTED: lengsin, partial [Ursus maritimus]
gene12195	[E]	Amino acid transport and metabolism	Molecular Function: tryptophan 5-monooxygenase activity (GO:0004510);; Molecular Function: iron ion binding (GO:0005506);; Biological Process: aromatic amino acid family metabolic process (GO:0009072);; Molecular Function: amino acid binding (GO:0016597);; Biological Process: serotonin biosynthetic process (GO:0042427);; Biological Process: oxidation-reduction process (GO:0055114);;	K00502|0|bacu:103006656|TPH2; tryptophan hydroxylase 2; K00502 tryptophan 5-monooxygenase [EC:1.14.16.4] (A)	[E]	Amino acid transport and metabolism	Tryptophan 5-hydroxylase 2 GN=TPH2 OS=Macaca mulatta (Rhesus macaque) PE=2 SV=1	Uncharacterized protein {ECO:0000313|Ensembl:ENSOCUP00000013456} OS=Oryctolagus cuniculus (Rabbit) PE=4 SV=1	PREDICTED: tryptophan 5-hydroxylase 2 isoform X2 [Sorex araneus]
gene1723	[E]	Amino acid transport and metabolism	Cellular Component: cytoplasm (GO:0005737);; Biological Process: proteolysis (GO:0006508);; Biological Process: bradykinin catabolic process (GO:0010815);; Molecular Function: manganese ion binding (GO:0030145);; Molecular Function: protein homodimerization activity (GO:0042803);; Molecular Function: metalloaminopeptidase activity (GO:0070006);;	K01262|0|ssc:100152688|XPNPEP1; X-prolyl aminopeptidase (aminopeptidase P) 1, soluble; K01262 Xaa-Pro aminopeptidase [EC:3.4.11.9] (A)	[E]	Amino acid transport and metabolism	Xaa-Pro aminopeptidase 1 GN=XPNPEP1 OS=Bos taurus (Bovine) PE=2 SV=1	Uncharacterized protein {ECO:0000313|Ensembl:ENSCAFP00000015726} OS=Canis familiaris (Dog) PE=3 SV=2	PREDICTED: xaa-Pro aminopeptidase 1 isoformX4 [Canis lupus familiaris]
gene7538	[E]	Amino acid transport and metabolism	Molecular Function: asparagine synthase (glutamine-hydrolyzing) activity (GO:0004066);; Biological Process: asparagine biosynthetic process (GO:0006529);;	--	[E]	Amino acid transport and metabolism	Asparagine synthetase domain-containing protein 1 GN=ASNSD1 OS=Macaca fascicularis (Crab-eating macaque) PE=2 SV=1	Uncharacterized protein {ECO:0000313|Ensembl:ENSFCAP00000019452} OS=Felis catus (Cat) PE=4 SV=1	PREDICTED: asparagine synthetase domain-containing protein 1 [Ceratotherium simum simum]
gene20672	[E]	Amino acid transport and metabolism	Molecular Function: acetyl-CoA:L-glutamate N-acetyltransferase activity (GO:0004042);; Cellular Component: mitochondrion (GO:0005739);; Biological Process: glutamate metabolic process (GO:0006536);; Biological Process: cellular amino acid biosynthetic process (GO:0008652);;	K11067|0|fca:101097029|NAGS; N-acetylglutamate synthase; K11067 N-acetylglutamate synthase [EC:2.3.1.1] (A)	[E]	Amino acid transport and metabolism	--	Uncharacterized protein {ECO:0000313|Ensembl:ENSFCAP00000018765} (Fragment) OS=Felis catus (Cat) PE=4 SV=1	PREDICTED: N-acetylglutamate synthase, mitochondrial isoform X3 [Canis lupus familiaris]
gene12958	[E]	Amino acid transport and metabolism	Molecular Function: proline dehydrogenase activity (GO:0004657);; Cellular Component: mitochondrial inner membrane (GO:0005743);; Biological Process: glutamate biosynthetic process (GO:0006537);; Biological Process: proline catabolic process (GO:0006562);; Biological Process: oxidation-reduction process (GO:0055114);;	K11394|0|fca:101087368|PRODH2; proline dehydrogenase (oxidase) 2; K11394 hydroxyproline oxidase [EC:1.5.-.-] (A)	[E]	Amino acid transport and metabolism	Probable proline dehydrogenase 2 GN=PRODH2 OS=Bos taurus (Bovine) PE=2 SV=1	Uncharacterized protein {ECO:0000313|Ensembl:ENSMPUP00000005977} OS=Mustela putorius furo (European domestic ferret) PE=4 SV=1	PREDICTED: probable proline dehydrogenase 2 [Mustela putorius furo]
gene6956	[E]	Amino acid transport and metabolism	Molecular Function: glutamate 5-kinase activity (GO:0004349);; Molecular Function: glutamate-5-semialdehyde dehydrogenase activity (GO:0004350);; Cellular Component: mitochondrion (GO:0005739);; Biological Process: glutamate metabolic process (GO:0006536);; Biological Process: proline biosynthetic process (GO:0006561);; Biological Process: ornithine biosynthetic process (GO:0006592);; Biological …	K12657|0|ssc:100151977|ALDH18A1; aldehyde dehydrogenase 18 family, member A1; K12657 delta-1-pyrroline-5-carboxylate synthetase [EC:2.7.2.11 1.2.1.41] (A)	[E]	Amino acid transport and metabolism	Gamma-glutamyl phosphate reductase GN=ALDH18A1 OS=Pongo abelii (Sumatran orangutan) PE=2 SV=1	Uncharacterized protein {ECO:0000313|Ensembl:ENSECAP00000015003} OS=Equus caballus (Horse) PE=4 SV=1	PREDICTED: delta-1-pyrroline-5-carboxylate synthase isoform X2 [Panthera tigris altaica]
gene7460	[E]	Amino acid transport and metabolism	Molecular Function: glycine hydroxymethyltransferase activity (GO:0004372);; Cellular Component: nucleus (GO:0005634);; Cellular Component: mitochondrion (GO:0005739);; Biological Process: glycine metabolic process (GO:0006544);; Biological Process: L-serine catabolic process (GO:0006565);; Biological Process: purine nucleobase biosynthetic process (GO:0009113);; Molecular Function: pyridoxal pho…	K00600|0|pale:102878386|SHMT1; serine hydroxymethyltransferase 1 (soluble); K00600 glycine hydroxymethyltransferase [EC:2.1.2.1] (A)	[E]	Amino acid transport and metabolism	Serine hydroxymethyltransferase, cytosolic GN=SHMT1 OS=Ovis aries (Sheep) PE=1 SV=3	Serine hydroxymethyltransferase {ECO:0000256|RuleBase:RU000585} OS=Canis familiaris (Dog) PE=3 SV=2	PREDICTED: serine hydroxymethyltransferase, cytosolic [Pteropus alecto]
gene3899	[E]	Amino acid transport and metabolism	Biological Process: kidney development (GO:0001822);; Molecular Function: ornithine decarboxylase activity (GO:0004586);; Cellular Component: cytosol (GO:0005829);; Biological Process: polyamine biosynthetic process (GO:0006596);; Biological Process: positive regulation of cell proliferation (GO:0008284);; Biological Process: response to virus (GO:0009615);;	K01581|0|ecb:100072405|ODC1; ornithine decarboxylase 1; K01581 ornithine decarboxylase [EC:4.1.1.17] (A)	[E]	Amino acid transport and metabolism	Ornithine decarboxylase GN=ODC1 OS=Bos taurus (Bovine) PE=2 SV=1	Uncharacterized protein {ECO:0000313|Ensembl:ENSECAP00000020295} OS=Equus caballus (Horse) PE=3 SV=1	PREDICTED: ornithine decarboxylase [Equus caballus]
gene25483	[E]	Amino acid transport and metabolism	Biological Process: amino acid transmembrane transport (GO:0003333);; Molecular Function: arginine transmembrane transporter activity (GO:0015181);; Biological Process: arginine transport (GO:0015809);; Cellular Component: integral component of membrane (GO:0016021);;	K13863|0|ecb:100063073|SLC7A1; solute carrier family 7 (cationic amino acid transporter, y+ system), member 1; K13863 solute carrier family 7 (cationic amino acid transporter), member 1 (A)	[E]	Amino acid transport and metabolism	Cationic amino acid transporter 2 GN=SLC7A2 OS=Sus scrofa (Pig) PE=2 SV=1	Uncharacterized protein {ECO:0000313|Ensembl:ENSECAP00000013361} OS=Equus caballus (Horse) PE=4 SV=1	PREDICTED: high affinity cationic amino acid transporter 1 [Ceratotherium simum simum]
gene13637	[E]	Amino acid transport and metabolism	Biological Process: urea cycle (GO:0000050);; Molecular Function: argininosuccinate lyase activity (GO:0004056);; Biological Process: internal protein amino acid acetylation (GO:0006475);; Biological Process: locomotory behavior (GO:0007626);; Biological Process: post-embryonic development (GO:0009791);; Biological Process: ammonia assimilation cycle (GO:0019676);; Biological Process: arginine bi…	K01755|0|fca:101101529|argininosuccinate lyase-like; K01755 argininosuccinate lyase [EC:4.3.2.1] (A)	[E]	Amino acid transport and metabolism	Argininosuccinate lyase GN=ASL OS=Bos taurus (Bovine) PE=2 SV=1	Uncharacterized protein {ECO:0000313|Ensembl:ENSFCAP00000006432} OS=Felis catus (Cat) PE=3 SV=1	PREDICTED: argininosuccinate lyase-like isoform X1 [Pteropus alecto]
gene22672	[E]	Amino acid transport and metabolism	Cellular Component: integral component of membrane (GO:0016021);;	K14993|0|oas:101105333|SLC38A6; solute carrier family 38, member 6; K14993 solute carrier family 38 (sodium-coupled neutral amino acid transporter), member 6 (A)	[E]	Amino acid transport and metabolism	Sodium-coupled neutral amino acid transporter 4 GN=SLC38A4 OS=Pongo abelii (Sumatran orangutan) PE=2 SV=1	Uncharacterized protein {ECO:0000313|Ensembl:ENSOARP00000022714} OS=Ovis aries (Sheep) PE=4 SV=1	PREDICTED: probable sodium-coupled neutral amino acid transporter 6 [Ceratotherium simum simum]
gene1173	[E]	Amino acid transport and metabolism	Biological Process: amino acid transmembrane transport (GO:0003333);; Molecular Function: amino acid transmembrane transporter activity (GO:0015171);; Cellular Component: integral component of membrane (GO:0016021);; Cellular Component: protein complex (GO:0043234);; Molecular Function: protein heterodimerization activity (GO:0046982);;	--	[E]	Amino acid transport and metabolism	b(0,+)-type amino acid transporter 1 OS=Oryctolagus cuniculus (Rabbit) PE=1 SV=1	Uncharacterized protein {ECO:0000313|Ensembl:ENSCAFP00000005730} OS=Canis familiaris (Dog) PE=4 SV=2	PREDICTED: B(0,+)-type amino acid transporter 1-like [Canis lupus familiaris]
gene21034	[E]	Amino acid transport and metabolism	Molecular Function: aminomethyltransferase activity (GO:0004047);; Cellular Component: mitochondrion (GO:0005739);; Biological Process: glycine catabolic process (GO:0006546);; Molecular Function: transaminase activity (GO:0008483);;	K00605|0|ecb:100053253|AMT; aminomethyltransferase; K00605 aminomethyltransferase [EC:2.1.2.10] (A)	[E]	Amino acid transport and metabolism	Aminomethyltransferase, mitochondrial (Precursor) GN=AMT OS=Canis familiaris (Dog) PE=3 SV=1	Aminomethyltransferase {ECO:0000256|RuleBase:RU003981} OS=Equus caballus (Horse) PE=3 SV=1	PREDICTED: aminomethyltransferase, mitochondrial isoform 1 [Equus caballus]
gene10889	[E]	Amino acid transport and metabolism	Biological Process: cellular process (GO:0009987);; Molecular Function: hydrolase activity (GO:0016787);; Molecular Function: metal ion binding (GO:0046872);;	K14208|0|pps:100988589|XPNPEP2; X-prolyl aminopeptidase (aminopeptidase P) 2, membrane-bound; K14208 Xaa-Pro aminopeptidase 2 [EC:3.4.11.9] (A)	[E]	Amino acid transport and metabolism	Xaa-Pro aminopeptidase 2 (Precursor) GN=XPNPEP2 OS=Sus scrofa (Pig) PE=1 SV=1	Xaa-Pro aminopeptidase 2 {ECO:0000313|EMBL:EHH61211.1} OS=Macaca fascicularis (Crab-eating macaque) PE=3 SV=1	PREDICTED: xaa-Pro aminopeptidase 2 isoform X1 [Loxodonta africana]
gene1267	[E]	Amino acid transport and metabolism	Molecular Function: L-alanine:2-oxoglutarate aminotransferase activity (GO:0004021);; Cellular Component: mitochondrion (GO:0005739);; Biological Process: 2-oxoglutarate metabolic process (GO:0006103);; Biological Process: biosynthetic process (GO:0009058);; Molecular Function: pyridoxal phosphate binding (GO:0030170);; Biological Process: L-alanine metabolic process (GO:0042851);;	K00814|0|fca:101088131|GPT2; glutamic pyruvate transaminase (alanine aminotransferase) 2; K00814 alanine transaminase [EC:2.6.1.2] (A)	[E]	Amino acid transport and metabolism	Alanine aminotransferase 1 GN=GPT OS=Bos taurus (Bovine) PE=1 SV=1	Uncharacterized protein {ECO:0000313|Ensembl:ENSMPUP00000002808} OS=Mustela putorius furo (European domestic ferret) PE=4 SV=1	PREDICTED: alanine aminotransferase 2 isoform X1 [Mustela putorius furo]
gene23363	[E]	Amino acid transport and metabolism	Molecular Function: chromatin binding (GO:0003682);; Molecular Function: glycine hydroxymethyltransferase activity (GO:0004372);; Cellular Component: mitochondrial inner membrane (GO:0005743);; Biological Process: glycine metabolic process (GO:0006544);; Biological Process: L-serine metabolic process (GO:0006563);; Cellular Component: microtubule cytoskeleton (GO:0015630);; Molecular Function: py…	K00600|0|ecb:100050119|SHMT2; serine hydroxymethyltransferase 2 (mitochondrial); K00600 glycine hydroxymethyltransferase [EC:2.1.2.1] (A)	[E]	Amino acid transport and metabolism	Serine hydroxymethyltransferase, mitochondrial (Precursor) GN=SHMT2 OS=Oryctolagus cuniculus (Rabbit) PE=1 SV=2	Serine hydroxymethyltransferase {ECO:0000256|RuleBase:RU000585} OS=Felis catus (Cat) PE=3 SV=1	PREDICTED: serine hydroxymethyltransferase, mitochondrial [Equus przewalskii]
gene1742	[E]	Amino acid transport and metabolism	Biological Process: amino acid transmembrane transport (GO:0003333);; Molecular Function: L-leucine transmembrane transporter activity (GO:0015190);; Molecular Function: L-phenylalanine transmembrane transporter activity (GO:0015192);; Molecular Function: L-tryptophan transmembrane transporter activity (GO:0015196);; Biological Process: L-amino acid transport (GO:0015807);; Biological Process: le…	K13780|0|pon:100448375|SLC7A5; solute carrier family 7 (amino acid transporter light chain, L system), member 5; K13780 solute carrier family 7 (L-type amino acid transporter), member 5 (A)	[E]	Amino acid transport and metabolism	Large neutral amino acids transporter small subunit 1 OS=Oryctolagus cuniculus (Rabbit) PE=1 SV=1	Large neutral amino acids transporter small subunit 1 {ECO:0000313|EMBL:JAB02284.1} OS=Callithrix jacchus (White-tufted-ear marmoset) PE=2 SV=1	large neutral amino acids transporter small subunit 1 [Canis lupus familiaris]
gene18308	[E]	Amino acid transport and metabolism	Cellular Component: cytoplasm (GO:0005737);; Molecular Function: zinc ion binding (GO:0008270);; Molecular Function: methionine synthase activity (GO:0008705);; Molecular Function: S-adenosylmethionine-homocysteine S-methyltransferase activity (GO:0008898);; Biological Process: methionine biosynthetic process (GO:0009086);; Molecular Function: cobalamin binding (GO:0031419);; Biological Process: …	K00548|1.99673e-111|bom:102272310|MTR; 5-methyltetrahydrofolate-homocysteine methyltransferase; K00548 5-methyltetrahydrofolate--homocysteine methyltransferase [EC:2.1.1.13] (A)	[E]	Amino acid transport and metabolism	Methionine synthase GN=MTR OS=Bos taurus (Bovine) PE=2 SV=1	5-methyltetrahydrofolate-homocysteine methyltransferase {ECO:0000313|EMBL:JAA53594.1} OS=Sus scrofa (Pig) PE=2 SV=1	PREDICTED: methionine synthase-like, partial [Tursiops truncatus]
gene11128	[E]	Amino acid transport and metabolism	Molecular Function: metallocarboxypeptidase activity (GO:0004181);; Biological Process: proteolysis (GO:0006508);; Molecular Function: zinc ion binding (GO:0008270);;	--	[E]	Amino acid transport and metabolism	Cytosolic carboxypeptidase 2 GN=AGBL2 OS=Macaca fascicularis (Crab-eating macaque) PE=2 SV=1	Uncharacterized protein {ECO:0000313|Ensembl:ENSMPUP00000003810} OS=Mustela putorius furo (European domestic ferret) PE=4 SV=1	PREDICTED: cytosolic carboxypeptidase 2 isoform X2 [Mustela putorius furo]
gene13955	[E]	Amino acid transport and metabolism	Biological Process: amino acid transmembrane transport (GO:0003333);; Molecular Function: amino acid transmembrane transporter activity (GO:0015171);; Cellular Component: integral component of membrane (GO:0016021);;	K13872|0|ptg:102950110|SLC7A6; solute carrier family 7 (amino acid transporter light chain, y+L system), member 6; K13872 solute carrier family 7 (L-type amino acid transporter), member 6 (A)	[E]	Amino acid transport and metabolism	Large neutral amino acids transporter small subunit 2 GN=SLC7A8 OS=Pongo abelii (Sumatran orangutan) PE=2 SV=2	Uncharacterized protein {ECO:0000313|Ensembl:ENSFCAP00000012740} OS=Felis catus (Cat) PE=4 SV=1	PREDICTED: Y+L amino acid transporter 2 isoform X1 [Equus przewalskii]
gene16841	[E]	Amino acid transport and metabolism	Molecular Function: cysteine-type endopeptidase activity (GO:0004197);; Cellular Component: nucleus (GO:0005634);; Cellular Component: cytoplasm (GO:0005737);; Biological Process: proteolysis (GO:0006508);; Biological Process: response to toxic substance (GO:0009636);; Biological Process: response to drug (GO:0042493);;	K01372|0|nle:100586005|BLMH; bleomycin hydrolase; K01372 bleomycin hydrolase [EC:3.4.22.40] (A)	[E]	Amino acid transport and metabolism	Bleomycin hydrolase (Fragment) GN=BLMH OS=Oryctolagus cuniculus (Rabbit) PE=1 SV=1	Uncharacterized protein {ECO:0000313|Ensembl:ENSNLEP00000004441} OS=Nomascus leucogenys (Northern white-cheeked gibbon) PE=4 SV=1	PREDICTED: bleomycin hydrolase isoform X2 [Equus przewalskii]
gene4536	[E]	Amino acid transport and metabolism	Cellular Component: nucleus (GO:0005634);; Cellular Component: mitochondrion (GO:0005739);; Cellular Component: cytosol (GO:0005829);; Biological Process: tryptophan catabolic process (GO:0006569);; Biological Process: quinolinate biosynthetic process (GO:0019805);; Molecular Function: pyridoxal phosphate binding (GO:0030170);; Molecular Function: kynureninase activity (GO:0030429);; Biological P…	K01556|0|cfr:102510329|KYNU; kynureninase; K01556 kynureninase [EC:3.7.1.3] (A)	[E]	Amino acid transport and metabolism	--	Kynureninase {ECO:0000256|HAMAP-Rule:MF_03017, ECO:0000256|PIRNR:PIRNR038800} OS=Mustela putorius furo (European domestic ferret) PE=3 SV=1	PREDICTED: kynureninase isoform X1 [Vicugna pacos]
gene8353	[E]	Amino acid transport and metabolism	Cellular Component: mitochondrion (GO:0005739);; Cellular Component: glycine cleavage complex (GO:0005960);; Biological Process: glycine decarboxylation via glycine cleavage system (GO:0019464);;	K02437|5.92045e-109|bacu:103015867|GCSH; glycine cleavage system protein H (aminomethyl carrier); K02437 glycine cleavage system H protein (A)	[E]	Amino acid transport and metabolism	Glycine cleavage system H protein, mitochondrial (Precursor) GN=GCSH OS=Bos taurus (Bovine) PE=1 SV=1	Glycine cleavage system H protein, mitochondrial {ECO:0000313|EMBL:EHH60598.1} OS=Macaca fascicularis (Crab-eating macaque) PE=3 SV=1	PREDICTED: glycine cleavage system H protein, mitochondrial [Camelus bactrianus]
gene10146	[E]	Amino acid transport and metabolism	Molecular Function: aminomethyltransferase activity (GO:0004047);; Cellular Component: mitochondrion (GO:0005739);; Biological Process: glycine catabolic process (GO:0006546);; Molecular Function: dimethylglycine dehydrogenase activity (GO:0047865);; Biological Process: oxidation-reduction process (GO:0055114);;	K00315|0|bacu:103000721|DMGDH; dimethylglycine dehydrogenase; K00315 dimethylglycine dehydrogenase [EC:1.5.8.4] (A)	[E]	Amino acid transport and metabolism	Pyruvate dehydrogenase phosphatase regulatory subunit, mitochondrial (Precursor) GN=PDPR OS=Bos taurus (Bovine) PE=1 SV=1	Dimethylglycine dehydrogenase, mitochondrial {ECO:0000313|EMBL:EPQ02633.1} OS=Myotis brandtii (Brandt's bat) PE=3 SV=1	PREDICTED: dimethylglycine dehydrogenase, mitochondrial isoform X1 [Balaenoptera acutorostrata scammoni]
gene7156	[E]	Amino acid transport and metabolism	Molecular Function: metallocarboxypeptidase activity (GO:0004181);; Biological Process: proteolysis (GO:0006508);; Molecular Function: zinc ion binding (GO:0008270);;	--	[E]	Amino acid transport and metabolism	Cytosolic carboxypeptidase 3 GN=AGBL3 OS=Bos taurus (Bovine) PE=3 SV=1	Uncharacterized protein {ECO:0000313|Ensembl:ENSECAP00000017522} OS=Equus caballus (Horse) PE=4 SV=1	PREDICTED: cytosolic carboxypeptidase 1 isoform X2 [Equus caballus]
gene5457	[E]	Amino acid transport and metabolism	Molecular Function: L-ornithine transmembrane transporter activity (GO:0000064);; Biological Process: nitric oxide production involved in inflammatory response (GO:0002537);; Biological Process: amino acid transmembrane transport (GO:0003333);; Molecular Function: high-affinity arginine transmembrane transporter activity (GO:0005289);; Cellular Component: cytoplasm (GO:0005737);; Biological Proce…	K13864|0|bacu:103010063|SLC7A2; solute carrier family 7 (cationic amino acid transporter, y+ system), member 2; K13864 solute carrier family 7 (cationic amino acid transporter), member 2 (A)	[E]	Amino acid transport and metabolism	Cationic amino acid transporter 2 GN=SLC7A2 OS=Sus scrofa (Pig) PE=2 SV=1	Uncharacterized protein {ECO:0000313|Ensembl:ENSFCAP00000022928} OS=Felis catus (Cat) PE=4 SV=1	PREDICTED: low affinity cationic amino acid transporter 2 isoform X1 [Balaenoptera acutorostrata scammoni]
gene1683	[E]	Amino acid transport and metabolism	Cellular Component: integral component of plasma membrane (GO:0005887);; Biological Process: oligopeptide transport (GO:0006857);; Biological Process: protein transport (GO:0015031);; Molecular Function: symporter activity (GO:0015293);; Molecular Function: high-affinity oligopeptide transporter activity (GO:0015334);;	K14637|0|nle:100600641|SLC15A2; solute carrier family 15 (H+/peptide transporter), member 2; K14637 solute carrier family 15 (oligopeptide transporter), member 2 (A)	[E]	Amino acid transport and metabolism	Solute carrier family 15 member 2 GN=SLC15A2 OS=Oryctolagus cuniculus (Rabbit) PE=2 SV=1	Uncharacterized protein {ECO:0000313|Ensembl:ENSCAFP00000017213} OS=Canis familiaris (Dog) PE=3 SV=2	PREDICTED: solute carrier family 15 member 2 isoform 2 [Canis lupus familiaris]
gene6401	[E]	Amino acid transport and metabolism	Biological Process: glomerular filtration (GO:0003094);; Molecular Function: aminopeptidase activity (GO:0004177);; Cellular Component: mitochondrion (GO:0005739);; Biological Process: cellular process (GO:0009987);; Biological Process: protein processing (GO:0016485);; Molecular Function: manganese ion binding (GO:0030145);;	K01262|3.93982e-171|mcc:705778|probable Xaa-Pro aminopeptidase 3-like; K01262 Xaa-Pro aminopeptidase [EC:3.4.11.9] (A)	[E]	Amino acid transport and metabolism	Probable Xaa-Pro aminopeptidase 3 GN=XPNPEP3 OS=Pongo abelii (Sumatran orangutan) PE=2 SV=1	Uncharacterized protein {ECO:0000313|Ensembl:ENSMMUP00000005437} (Fragment) OS=Macaca mulatta (Rhesus macaque) PE=4 SV=1	PREDICTED: probable Xaa-Pro aminopeptidase 3 isoform 2 [Ceratotherium simum simum]
gene21327	[E]	Amino acid transport and metabolism	Molecular Function: hydrolase activity, acting on carbon-nitrogen (but not peptide) bonds, in linear amidines (GO:0016813);; Molecular Function: metal ion binding (GO:0046872);;	K01480|7.24833e-83|lve:103078007|AGMAT; agmatine ureohydrolase (agmatinase); K01480 agmatinase [EC:3.5.3.11] (A)	[E]	Amino acid transport and metabolism	--	Uncharacterized protein {ECO:0000313|Ensembl:ENSLAFP00000011313} OS=Loxodonta africana (African elephant) PE=3 SV=1	PREDICTED: agmatinase, mitochondrial [Tursiops truncatus]
gene1418	[E]	Amino acid transport and metabolism	Cellular Component: mitochondrion (GO:0005739);; Biological Process: L-lysine catabolic process to acetyl-CoA via saccharopine (GO:0033512);; Molecular Function: saccharopine dehydrogenase (NADP+, L-lysine-forming) activity (GO:0047130);; Molecular Function: saccharopine dehydrogenase (NAD+, L-glutamate-forming) activity (GO:0047131);; Biological Process: oxidation-reduction process (GO:0055114);;	K14157|0|oas:101103973|AASS; aminoadipate-semialdehyde synthase; K14157 alpha-aminoadipic semialdehyde synthase [EC:1.5.1.8 1.5.1.9] (A)	[E]	Amino acid transport and metabolism	Saccharopine dehydrogenase (Precursor) OS=Bos taurus (Bovine) PE=2 SV=1	Uncharacterized protein {ECO:0000313|Ensembl:ENSOARP00000019953} OS=Ovis aries (Sheep) PE=4 SV=1	PREDICTED: alpha-aminoadipic semialdehyde synthase, mitochondrial [Capra hircus]
gene21634	[E]	Amino acid transport and metabolism	Biological Process: glomerular filtration (GO:0003094);; Molecular Function: aminopeptidase activity (GO:0004177);; Cellular Component: mitochondrion (GO:0005739);; Biological Process: cellular process (GO:0009987);; Biological Process: protein processing (GO:0016485);; Molecular Function: manganese ion binding (GO:0030145);;	K01262|1.55161e-180|umr:103674094|XPNPEP3; X-prolyl aminopeptidase (aminopeptidase P) 3, putative; K01262 Xaa-Pro aminopeptidase [EC:3.4.11.9] (A)	[E]	Amino acid transport and metabolism	Probable Xaa-Pro aminopeptidase 3 GN=XPNPEP3 OS=Pongo abelii (Sumatran orangutan) PE=2 SV=1	Uncharacterized protein {ECO:0000313|Ensembl:ENSFCAP00000017293} OS=Felis catus (Cat) PE=4 SV=1	PREDICTED: probable Xaa-Pro aminopeptidase 3 isoform X2 [Ursus maritimus]
gene20928	[E]	Amino acid transport and metabolism	Molecular Function: L-aspartate:2-oxoglutarate aminotransferase activity (GO:0004069);; Molecular Function: phosphatidylserine decarboxylase activity (GO:0004609);; Cellular Component: cytosol (GO:0005829);; Biological Process: oxaloacetate metabolic process (GO:0006107);; Biological Process: glycerol biosynthetic process (GO:0006114);; Biological Process: aspartate biosynthetic process (GO:00065…	K14454|0|ptg:102971975|GOT1; glutamic-oxaloacetic transaminase 1, soluble; K14454 aspartate aminotransferase, cytoplasmic [EC:2.6.1.1] (A)	[E]	Amino acid transport and metabolism	Aspartate aminotransferase, cytoplasmic GN=GOT1 OS=Sus scrofa (Pig) PE=1 SV=3	Aspartate aminotransferase {ECO:0000256|RuleBase:RU000480} OS=Tupaia chinensis (Chinese tree shrew) PE=3 SV=1	PREDICTED: aspartate aminotransferase, cytoplasmic [Panthera tigris altaica]
gene4949	[E]	Amino acid transport and metabolism	Biological Process: serine family amino acid catabolic process (GO:0009071);; Biological Process: dephosphorylation (GO:0016311);; Molecular Function: pyridoxal phosphate binding (GO:0030170);; Biological Process: 2-oxobutyrate biosynthetic process (GO:0046360);; Molecular Function: serine binding (GO:0070905);;	--	[E]	Amino acid transport and metabolism	Threonine synthase-like 2 GN=THNSL2 OS=Pongo abelii (Sumatran orangutan) PE=2 SV=1	Uncharacterized protein {ECO:0000313|Ensembl:ENSNLEP00000003657} OS=Nomascus leucogenys (Northern white-cheeked gibbon) PE=4 SV=1	PREDICTED: threonine synthase-like 2 [Ceratotherium simum simum]
gene3621	[E]	Amino acid transport and metabolism	Molecular Function: gamma-glutamyltransferase activity (GO:0003840);; Biological Process: glutathione biosynthetic process (GO:0006750);; Cellular Component: integral component of membrane (GO:0016021);; Molecular Function: glutathione hydrolase activity (GO:0036374);;	K00681|0|cfa:485847|GGT7, GGTL3; gamma-glutamyltransferase 7; K00681 gamma-glutamyltranspeptidase / glutathione hydrolase [EC:2.3.2.2 3.4.19.13] (A)	[E]	Amino acid transport and metabolism	Gamma-glutamyltransferase 7 light chain (Precursor) GN=GGT7 OS=Bos taurus (Bovine) PE=2 SV=1	Uncharacterized protein {ECO:0000313|Ensembl:ENSCAFP00000011267} OS=Canis familiaris (Dog) PE=4 SV=1	PREDICTED: gamma-glutamyltransferase 7 isoform 4 [Canis lupus familiaris]
gene23812	[E]	Amino acid transport and metabolism	Molecular Function: catalytic activity (GO:0003824);; Biological Process: metabolic process (GO:0008152);; Molecular Function: pyridoxal phosphate binding (GO:0030170);;	K01763|0|ecb:100066596|SCLY; selenocysteine lyase; K01763 selenocysteine lyase [EC:4.4.1.16] (A)	[E]	Amino acid transport and metabolism	Selenocysteine lyase GN=SCLY OS=Bos taurus (Bovine) PE=2 SV=1	Uncharacterized protein {ECO:0000313|Ensembl:ENSECAP00000010163} (Fragment) OS=Equus caballus (Horse) PE=4 SV=1	PREDICTED: selenocysteine lyase [Ceratotherium simum simum]
gene11606	[E]	Amino acid transport and metabolism	Biological Process: amino acid transmembrane transport (GO:0003333);; Cellular Component: cytoplasm (GO:0005737);; Molecular Function: organic cation transmembrane transporter activity (GO:0015101);; Molecular Function: L-amino acid transmembrane transporter activity (GO:0015179);; Biological Process: organic cation transport (GO:0015695);; Biological Process: neutral amino acid transport (GO:001…	K13781|0|ecb:100052453|SLC7A8; solute carrier family 7 (amino acid transporter light chain, L system), member 8; K13781 solute carrier family 7 (L-type amino acid transporter), member 8 (A)	[E]	Amino acid transport and metabolism	Large neutral amino acids transporter small subunit 2 OS=Oryctolagus cuniculus (Rabbit) PE=1 SV=1	Uncharacterized protein {ECO:0000313|Ensembl:ENSECAP00000011997} OS=Equus caballus (Horse) PE=4 SV=1	PREDICTED: large neutral amino acids transporter small subunit 2 isoform 1 [Equus caballus]
gene449	[E]	Amino acid transport and metabolism	Cellular Component: nucleus (GO:0005634);; Cellular Component: mitochondrial matrix (GO:0005759);; Cellular Component: cytosol (GO:0005829);; Biological Process: cysteine metabolic process (GO:0006534);; Biological Process: iron incorporation into metallo-sulfur cluster (GO:0018283);; Molecular Function: pyridoxal phosphate binding (GO:0030170);; Molecular Function: cysteine desulfurase activity …	K04487|0|ptg:102967252|NFS1; NFS1 cysteine desulfurase; K04487 cysteine desulfurase [EC:2.8.1.7] (A)	[E]	Amino acid transport and metabolism	Cysteine desulfurase, mitochondrial (Precursor) GN=NFS1 OS=Pongo abelii (Sumatran orangutan) PE=2 SV=1	Uncharacterized protein {ECO:0000313|Ensembl:ENSCAFP00000012221} OS=Canis familiaris (Dog) PE=3 SV=2	PREDICTED: cysteine desulfurase, mitochondrial isoform 1 [Odobenus rosmarus divergens]
gene25163	[E]	Amino acid transport and metabolism	Molecular Function: asparaginase activity (GO:0004067);; Cellular Component: nucleus (GO:0005634);; Cellular Component: cytoplasm (GO:0005737);; Biological Process: proteolysis (GO:0006508);; Molecular Function: beta-aspartyl-peptidase activity (GO:0008798);; Cellular Component: microtubule cytoskeleton (GO:0015630);; Biological Process: asparagine catabolic process via L-aspartate (GO:0033345);;	K13051|3.12209e-79|tup:102501872|ASRGL1; asparaginase like 1; K13051 beta-aspartyl-peptidase (threonine type) [EC:3.4.19.5] (A)	[E]	Amino acid transport and metabolism	Isoaspartyl peptidase/L-asparaginase beta chain (Precursor) GN=ASRGL1 OS=Bos taurus (Bovine) PE=2 SV=1	L-asparaginase {ECO:0000313|EMBL:ELW52039.1} OS=Tupaia chinensis (Chinese tree shrew) PE=4 SV=1	PREDICTED: isoaspartyl peptidase/L-asparaginase-like, partial [Equus przewalskii]
gene10145	[E]	Amino acid transport and metabolism	Cellular Component: cytoplasm (GO:0005737);; Molecular Function: zinc ion binding (GO:0008270);; Molecular Function: S-adenosylmethionine-homocysteine S-methyltransferase activity (GO:0008898);; Biological Process: methionine biosynthetic process (GO:0009086);; Molecular Function: betaine-homocysteine S-methyltransferase activity (GO:0047150);;	--	[E]	Amino acid transport and metabolism	S-methylmethionine--homocysteine S-methyltransferase BHMT2 GN=BHMT2 OS=Pongo abelii (Sumatran orangutan) PE=2 SV=1	Uncharacterized protein {ECO:0000313|Ensembl:ENSOGAP00000007734} OS=Otolemur garnettii (Small-eared galago) PE=4 SV=1	PREDICTED: S-methylmethionine--homocysteine S-methyltransferase BHMT2 [Trichechus manatus latirostris]
gene10623	[E]	Amino acid transport and metabolism	Molecular Function: 4-aminobutyrate transaminase activity (GO:0003867);; Cellular Component: mitochondrial matrix (GO:0005759);; Cellular Component: cytosol (GO:0005829);; Biological Process: gamma-aminobutyric acid catabolic process (GO:0009450);; Molecular Function: pyridoxal phosphate binding (GO:0030170);; Cellular Component: 4-aminobutyrate transaminase complex (GO:0032144);; Molecular Funct…	K13524|0|cjc:100409777|ABAT; 4-aminobutyrate aminotransferase; K13524 4-aminobutyrate aminotransferase / (S)-3-amino-2-methylpropionate transaminase [EC:2.6.1.19 2.6.1.22] (A)	[E]	Amino acid transport and metabolism	4-aminobutyrate aminotransferase, mitochondrial (Precursor) GN=ABAT OS=Sus scrofa (Pig) PE=1 SV=2	4-aminobutyrate aminotransferase, mitochondrial {ECO:0000313|EMBL:JAB50169.1} OS=Callithrix jacchus (White-tufted-ear marmoset) PE=2 SV=1	PREDICTED: 4-aminobutyrate aminotransferase, mitochondrial [Equus przewalskii]
gene9070	[E]	Amino acid transport and metabolism	Molecular Function: proton-dependent oligopeptide secondary active transmembrane transporter activity (GO:0005427);; Biological Process: oligopeptide transport (GO:0006857);; Biological Process: protein transport (GO:0015031);; Molecular Function: symporter activity (GO:0015293);; Cellular Component: integral component of membrane (GO:0016021);;	K14206|0|umr:103657643|SLC15A1; solute carrier family 15 (oligopeptide transporter), member 1; K14206 solute carrier family 15 (oligopeptide transporter), member 1 (A)	[E]	Amino acid transport and metabolism	Solute carrier family 15 member 1 GN=SLC15A1 OS=Canis familiaris (Dog) PE=2 SV=2	Uncharacterized protein {ECO:0000313|Ensembl:ENSAMEP00000004361} (Fragment) OS=Ailuropoda melanoleuca (Giant panda) PE=3 SV=1	PREDICTED: solute carrier family 15 member 1 [Ursus maritimus]
gene8408	[E]	Amino acid transport and metabolism	Biological Process: amino acid transmembrane transport (GO:0003333);; Molecular Function: arginine transmembrane transporter activity (GO:0015181);; Molecular Function: L-lysine transmembrane transporter activity (GO:0015189);; Molecular Function: basic amino acid transmembrane transporter activity (GO:0015326);; Biological Process: arginine transport (GO:0015809);; Biological Process: lysine tra…	K13865|0|cfr:102519032|SLC7A3; solute carrier family 7 (cationic amino acid transporter, y+ system), member 3; K13865 solute carrier family 7 (cationic amino acid transporter), member 3 (A)	[E]	Amino acid transport and metabolism	Cationic amino acid transporter 2 GN=SLC7A2 OS=Sus scrofa (Pig) PE=2 SV=1	Uncharacterized protein {ECO:0000313|Ensembl:ENSAMEP00000009922} OS=Ailuropoda melanoleuca (Giant panda) PE=4 SV=1	PREDICTED: cationic amino acid transporter 3 isoform X1 [Camelus ferus]
gene12029	[E]	Amino acid transport and metabolism	Biological Process: oligopeptide transport (GO:0006857);; Biological Process: protein transport (GO:0015031);; Molecular Function: symporter activity (GO:0015293);; Cellular Component: integral component of membrane (GO:0016021);;	K14638|0|bta:510499|SLC15A4; solute carrier family 15 (oligopeptide transporter), member 4; K14638 solute carrier family 15 (peptide/histidine transporter), member 3/4 (A)	[E]	Amino acid transport and metabolism	Solute carrier family 15 member 4 GN=SLC15A4 OS=Bos taurus (Bovine) PE=2 SV=2	Solute carrier family 15 member 4 {ECO:0000313|EMBL:AHI95968.1} OS=Sus scrofa (Pig) PE=2 SV=1	solute carrier family 15 member 4 [Sus scrofa]
gene4174	[E]	Amino acid transport and metabolism	Molecular Function: carboxy-lyase activity (GO:0016831);; Biological Process: carboxylic acid metabolic process (GO:0019752);; Molecular Function: pyridoxal phosphate binding (GO:0030170);;	K18966|0|ptg:102952401|GADL1; glutamate decarboxylase-like 1; K18966 sulfinoalanine decarboxylase / aspartate 1-decarboxylase [EC:4.1.1.29 4.1.1.11] (A)	[E]	Amino acid transport and metabolism	Acidic amino acid decarboxylase GADL1 GN=GADL1 OS=Bos taurus (Bovine) PE=2 SV=2	Uncharacterized protein {ECO:0000313|Ensembl:ENSPTRP00000025376} OS=Pan troglodytes (Chimpanzee) PE=3 SV=1	PREDICTED: glutamate decarboxylase-like protein 1 [Panthera tigris altaica]
gene24421	[E]	Amino acid transport and metabolism	Molecular Function: catalytic activity (GO:0003824);; Biological Process: metabolic process (GO:0008152);; Molecular Function: pyridoxal phosphate binding (GO:0030170);;	K01758|0|cfr:102505835|CTH; cystathionase (cystathionine gamma-lyase); K01758 cystathionine gamma-lyase [EC:4.4.1.1] (A)	[E]	Amino acid transport and metabolism	Cystathionine gamma-lyase GN=CTH OS=Bos taurus (Bovine) PE=2 SV=1	Uncharacterized protein {ECO:0000313|Ensembl:ENSFCAP00000011548} OS=Felis catus (Cat) PE=3 SV=1	PREDICTED: cystathionine gamma-lyase isoform 1 [Odobenus rosmarus divergens]
gene1526	[E]	Amino acid transport and metabolism	Molecular Function: carboxy-lyase activity (GO:0016831);; Biological Process: carboxylic acid metabolic process (GO:0019752);; Molecular Function: pyridoxal phosphate binding (GO:0030170);;	K01594|0|pale:102896743|CSAD; cysteine sulfinic acid decarboxylase; K01594 sulfinoalanine decarboxylase [EC:4.1.1.29] (A)	[E]	Amino acid transport and metabolism	Acidic amino acid decarboxylase GADL1 GN=GADL1 OS=Bos taurus (Bovine) PE=2 SV=2	Uncharacterized protein {ECO:0000313|Ensembl:ENSECAP00000005616} (Fragment) OS=Equus caballus (Horse) PE=3 SV=1	PREDICTED: cysteine sulfinic acid decarboxylase isoform X1 [Equus przewalskii]
gene23481	[E]	Amino acid transport and metabolism	Cellular Component: extracellular region (GO:0005576);; Biological Process: proteolysis (GO:0006508);; Molecular Function: peptidase activity (GO:0008233);; Molecular Function: metal ion binding (GO:0046872);;	K13049|0|lve:103078637|PM20D1; peptidase M20 domain containing 1; K13049 carboxypeptidase PM20D1 [EC:3.4.17.-] (A)	[E]	Amino acid transport and metabolism	Probable carboxypeptidase PM20D1 (Precursor) GN=PM20D1 OS=Bos taurus (Bovine) PE=2 SV=1	Uncharacterized protein {ECO:0000313|Ensembl:ENSOARP00000004974} (Fragment) OS=Ovis aries (Sheep) PE=4 SV=1	PREDICTED: probable carboxypeptidase PM20D1 isoform X2 [Physeter catodon]
gene13968	[E]	Amino acid transport and metabolism	Molecular Function: tyrosine 3-monooxygenase activity (GO:0004511);; Molecular Function: iron ion binding (GO:0005506);; Biological Process: aromatic amino acid family metabolic process (GO:0009072);; Biological Process: neurotransmitter biosynthetic process (GO:0042136);; Biological Process: dopamine biosynthetic process (GO:0042416);; Biological Process: oxidation-reduction process (GO:0055114)…	K00501|0|cfa:403444|TH; tyrosine hydroxylase (EC:1.14.16.2); K00501 tyrosine 3-monooxygenase [EC:1.14.16.2] (A)	[E]	Amino acid transport and metabolism	Tyrosine 3-monooxygenase GN=TH OS=Canis familiaris (Dog) PE=2 SV=1	Tyrosine 3-monooxygenase {ECO:0000313|Ensembl:ENSCAFP00000014845} OS=Canis familiaris (Dog) PE=4 SV=2	PREDICTED: tyrosine 3-monooxygenase [Odobenus rosmarus divergens]
gene3578	[E]	Amino acid transport and metabolism	Molecular Function: metallocarboxypeptidase activity (GO:0004181);; Cellular Component: nucleus (GO:0005634);; Cellular Component: cytosol (GO:0005829);; Biological Process: proteolysis (GO:0006508);; Molecular Function: zinc ion binding (GO:0008270);; Molecular Function: tubulin binding (GO:0015631);; Biological Process: protein branching point deglutamylation (GO:0035611);;	--	[E]	Amino acid transport and metabolism	Cytosolic carboxypeptidase-like protein 5 GN=AGBL5 OS=Bos taurus (Bovine) PE=2 SV=3	Uncharacterized protein {ECO:0000313|Ensembl:ENSFCAP00000009170} OS=Felis catus (Cat) PE=4 SV=1	PREDICTED: cytosolic carboxypeptidase-like protein 5 isoform X1 [Felis catus]
gene14335	[E]	Amino acid transport and metabolism	Molecular Function: ornithine-oxo-acid transaminase activity (GO:0004587);; Cellular Component: mitochondrion (GO:0005739);; Biological Process: metabolic process (GO:0008152);; Molecular Function: pyridoxal phosphate binding (GO:0030170);; Biological Process: protein hexamerization (GO:0034214);;	K00819|0|umr:103658039|OAT; ornithine aminotransferase; K00819 ornithine--oxo-acid transaminase [EC:2.6.1.13] (A)	[E]	Amino acid transport and metabolism	Ornithine aminotransferase, mitochondrial (Precursor) GN=OAT OS=Bos taurus (Bovine) PE=2 SV=1	Uncharacterized protein {ECO:0000313|Ensembl:ENSMPUP00000002720} OS=Mustela putorius furo (European domestic ferret) PE=3 SV=1	PREDICTED: ornithine aminotransferase, mitochondrial [Dasypus novemcinctus]
gene20098	[E]	Amino acid transport and metabolism	Cellular Component: membrane (GO:0016020);; Biological Process: transmembrane transport (GO:0055085);;	K14429|0|cfr:102508168|solute carrier family 12 member 9-like; K14429 solute carrier family 12 (potassium/chloride transporters), member 9 (A)	[E]	Amino acid transport and metabolism	Solute carrier family 12 member 7 OS=Oryctolagus cuniculus (Rabbit) PE=1 SV=1	Uncharacterized protein {ECO:0000313|Ensembl:ENSCAFP00000020769} OS=Canis familiaris (Dog) PE=4 SV=1	PREDICTED: solute carrier family 12 member 9 [Vicugna pacos]
gene23276	[E]	Amino acid transport and metabolism	Molecular Function: methylenetetrahydrofolate reductase (NAD(P)H) activity (GO:0004489);; Biological Process: methionine biosynthetic process (GO:0009086);; Biological Process: tetrahydrofolate interconversion (GO:0035999);; Biological Process: homocysteine metabolic process (GO:0050667);; Biological Process: oxidation-reduction process (GO:0055114);; Molecular Function: modified amino acid bindi…	K00297|0|ecb:100050979|MTHFR; methylenetetrahydrofolate reductase (NAD(P)H); K00297 methylenetetrahydrofolate reductase (NADPH) [EC:1.5.1.20] (A)	[E]	Amino acid transport and metabolism	Methylenetetrahydrofolate reductase GN=MTHFR OS=Bos taurus (Bovine) PE=2 SV=1	Methylenetetrahydrofolate reductase {ECO:0000256|RuleBase:RU003862} OS=Equus caballus (Horse) PE=3 SV=1	PREDICTED: methylenetetrahydrofolate reductase isoform X1 [Equus caballus]
gene22765	[E]	Amino acid transport and metabolism	Molecular Function: glycine dehydrogenase (decarboxylating) activity (GO:0004375);; Cellular Component: mitochondrion (GO:0005739);; Biological Process: glycine catabolic process (GO:0006546);; Molecular Function: lyase activity (GO:0016829);; Molecular Function: pyridoxal phosphate binding (GO:0030170);; Biological Process: oxidation-reduction process (GO:0055114);;	K00281|0|lve:103077978|GLDC; glycine dehydrogenase (decarboxylating); K00281 glycine dehydrogenase [EC:1.4.4.2] (A)	[E]	Amino acid transport and metabolism	--	Uncharacterized protein {ECO:0000313|Ensembl:ENSMPUP00000001252} OS=Mustela putorius furo (European domestic ferret) PE=3 SV=1	PREDICTED: glycine dehydrogenase [decarboxylating], mitochondrial [Orcinus orca]
gene7720	[E]	Amino acid transport and metabolism	Cellular Component: nucleus (GO:0005634);; Cellular Component: cytoplasm (GO:0005737);; Biological Process: biosynthetic process (GO:0009058);; Molecular Function: kynurenine-oxoglutarate transaminase activity (GO:0016212);; Molecular Function: pyridoxal phosphate binding (GO:0030170);; Molecular Function: protein homodimerization activity (GO:0042803);; Molecular Function: L-phenylalanine:pyruva…	K00816|0|bacu:103010164|CCBL1; cysteine conjugate-beta lyase, cytoplasmic; K00816 kynurenine---oxoglutarate transaminase / cysteine-S-conjugate beta-lyase / glutamine---phenylpyruvate transaminase [EC:2.6.1.7 4.4.1.13 2.6.1.64] (A)	[E]	Amino acid transport and metabolism	Kynurenine--oxoglutarate transaminase 3 GN=CCBL2 OS=Bos taurus (Bovine) PE=2 SV=1	Uncharacterized protein {ECO:0000313|Ensembl:ENSPTRP00000036664} OS=Pan troglodytes (Chimpanzee) PE=4 SV=1	PREDICTED: kynurenine--oxoglutarate transaminase 1 isoform X1 [Balaenoptera acutorostrata scammoni]
gene67	[E]	Amino acid transport and metabolism	Molecular Function: aminopeptidase activity (GO:0004177);; Biological Process: proteolysis (GO:0006508);; Molecular Function: metallopeptidase activity (GO:0008237);; Molecular Function: zinc ion binding (GO:0008270);;	K01267|0|ssc:100153171|DNPEP; aspartyl aminopeptidase (EC:3.4.11.21); K01267 aspartyl aminopeptidase [EC:3.4.11.21] (A)	[E]	Amino acid transport and metabolism	Aspartyl aminopeptidase GN=DNPEP OS=Bos taurus (Bovine) PE=1 SV=1	Uncharacterized protein {ECO:0000313|Ensembl:ENSCAFP00000022691} OS=Canis familiaris (Dog) PE=3 SV=2	PREDICTED: aspartyl aminopeptidase [Camelus dromedarius]
gene9775	[E]	Amino acid transport and metabolism	Biological Process: luteinization (GO:0001553);; Biological Process: vasculogenesis (GO:0001570);; Biological Process: kidney development (GO:0001822);; Cellular Component: endoplasmic reticulum (GO:0005783);; Biological Process: ceramide metabolic process (GO:0006672);; Biological Process: apoptotic process (GO:0006915);; Biological Process: spermatogenesis (GO:0007283);; Biological Process: and…	K01634|0|cfa:489032|SGPL1; sphingosine-1-phosphate lyase 1; K01634 sphinganine-1-phosphate aldolase [EC:4.1.2.27] (A)	[E]	Amino acid transport and metabolism	Sphingosine-1-phosphate lyase 1 GN=SGPL1 OS=Pongo abelii (Sumatran orangutan) PE=2 SV=1	Uncharacterized protein {ECO:0000313|Ensembl:ENSCAFP00000020786} OS=Canis familiaris (Dog) PE=3 SV=1	PREDICTED: sphingosine-1-phosphate lyase 1 [Canis lupus familiaris]
gene3193	[E]	Amino acid transport and metabolism	Molecular Function: N4-(beta-N-acetylglucosaminyl)-L-asparaginase activity (GO:0003948);; Cellular Component: lysosome (GO:0005764);; Cellular Component: endoplasmic reticulum (GO:0005783);; Biological Process: proteolysis (GO:0006508);; Biological Process: protein deglycosylation (GO:0006517);; Molecular Function: peptidase activity (GO:0008233);; Biological Process: protein maturation (GO:00516…	K01444|0|pale:102894840|AGA; aspartylglucosaminidase; K01444 N4-(beta-N-acetylglucosaminyl)-L-asparaginase [EC:3.5.1.26] (A)	[E]	Amino acid transport and metabolism	Glycosylasparaginase beta chain (Precursor) GN=AGA OS=Macaca fascicularis (Crab-eating macaque) PE=2 SV=1	N(4)-(Beta-N-acetylglucosaminyl)-L-asparaginase {ECO:0000313|EMBL:ELK08814.1} OS=Pteropus alecto (Black flying fox) PE=4 SV=1	PREDICTED: N(4)-(beta-N-acetylglucosaminyl)-L-asparaginase [Pteropus alecto]
gene19300	[E]	Amino acid transport and metabolism	Molecular Function: tryptophan 2,3-dioxygenase activity (GO:0004833);; Biological Process: tryptophan catabolic process to kynurenine (GO:0019441);; Molecular Function: heme binding (GO:0020037);; Molecular Function: metal ion binding (GO:0046872);; Biological Process: oxidation-reduction process (GO:0055114);;	K00453|0|umr:103658047|TDO2; tryptophan 2,3-dioxygenase; K00453 tryptophan 2,3-dioxygenase [EC:1.13.11.11] (A)	[E]	Amino acid transport and metabolism	Tryptophan 2,3-dioxygenase {ECO:0000255|HAMAP-Rule:MF_03020} OS=Bos taurus (Bovine) PE=2 SV=1	Tryptophan 2,3-dioxygenase {ECO:0000256|HAMAP-Rule:MF_03020} OS=Mustela putorius furo (European domestic ferret) PE=3 SV=1	PREDICTED: tryptophan 2,3-dioxygenase [Odobenus rosmarus divergens]
gene19738	[E]	Amino acid transport and metabolism	Biological Process: amino acid transmembrane transport (GO:0003333);; Molecular Function: amino acid transmembrane transporter activity (GO:0015171);; Cellular Component: integral component of membrane (GO:0016021);;	K13866|0|mmu:224022|Slc7a4, AI853530; solute carrier family 7 (cationic amino acid transporter, y+ system), member 4; K13866 solute carrier family 7 (cationic amino acid transporter), member 4 (A)	[E]	Amino acid transport and metabolism	Cationic amino acid transporter 2 GN=SLC7A2 OS=Sus scrofa (Pig) PE=2 SV=1	Uncharacterized protein {ECO:0000313|Ensembl:ENSLAFP00000018577} OS=Loxodonta africana (African elephant) PE=4 SV=1	PREDICTED: cationic amino acid transporter 4 [Trichechus manatus latirostris]
gene24827	[E]	Amino acid transport and metabolism	Biological Process: amino acid transmembrane transport (GO:0003333);; Molecular Function: amino acid transmembrane transporter activity (GO:0015171);; Cellular Component: integral component of membrane (GO:0016021);;	K13867|0|fca:101089271|SLC7A7; solute carrier family 7 (amino acid transporter light chain, y+L system), member 7; K13867 solute carrier family 7 (L-type amino acid transporter), member 7 (A)	[E]	Amino acid transport and metabolism	Large neutral amino acids transporter small subunit 2 OS=Oryctolagus cuniculus (Rabbit) PE=1 SV=1	Uncharacterized protein {ECO:0000313|Ensembl:ENSFCAP00000021234} (Fragment) OS=Felis catus (Cat) PE=4 SV=1	PREDICTED: Y+L amino acid transporter 1 [Felis catus]
gene13056	[E]	Amino acid transport and metabolism	Molecular Function: L-alanine:2-oxoglutarate aminotransferase activity (GO:0004021);; Cellular Component: cytoplasm (GO:0005737);; Biological Process: biosynthetic process (GO:0009058);; Molecular Function: pyridoxal phosphate binding (GO:0030170);; Biological Process: L-alanine catabolic process (GO:0042853);;	K00814|0|ssc:100524618|GPT; glutamic-pyruvate transaminase (alanine aminotransferase); K00814 alanine transaminase [EC:2.6.1.2] (A)	[E]	Amino acid transport and metabolism	Alanine aminotransferase 1 GN=GPT OS=Bos taurus (Bovine) PE=1 SV=1	Uncharacterized protein {ECO:0000313|Ensembl:ENSSSCP00000006308} OS=Sus scrofa (Pig) PE=4 SV=1	PREDICTED: alanine aminotransferase 1 [Ceratotherium simum simum]
gene10129	[E]	Amino acid transport and metabolism	Molecular Function: aminomethyltransferase activity (GO:0004047);; Cellular Component: mitochondrion (GO:0005739);; Biological Process: glycine catabolic process (GO:0006546);; Molecular Function: oxidoreductase activity (GO:0016491);;	K00314|1.29965e-124|aml:100477821|sarcosine dehydrogenase, mitochondrial-like; K00314 sarcosine dehydrogenase [EC:1.5.8.3] (A)	[E]	Amino acid transport and metabolism	Pyruvate dehydrogenase phosphatase regulatory subunit, mitochondrial (Precursor) GN=PDPR OS=Bos taurus (Bovine) PE=1 SV=1	Sarcosine dehydrogenase {ECO:0000313|EMBL:AES06073.1} (Fragment) OS=Mustela putorius furo (European domestic ferret) PE=2 SV=1	PREDICTED: sarcosine dehydrogenase, mitochondrial-like [Leptonychotes weddellii]
gene24987	[E]	Amino acid transport and metabolism	Molecular Function: asparaginase activity (GO:0004067);; Molecular Function: beta-aspartyl-peptidase activity (GO:0008798);; Biological Process: asparagine catabolic process via L-aspartate (GO:0033345);; Cellular Component: intracellular organelle (GO:0043229);;	--	[E]	Amino acid transport and metabolism	Isoaspartyl peptidase/L-asparaginase beta chain (Precursor) GN=ASRGL1 OS=Bos taurus (Bovine) PE=2 SV=1	Uncharacterized protein {ECO:0000313|Ensembl:ENSCAFP00000023340} OS=Canis familiaris (Dog) PE=4 SV=2	PREDICTED: isoaspartyl peptidase/L-asparaginase-like, partial [Equus caballus]
gene13228	[E]	Amino acid transport and metabolism	Molecular Function: catalytic activity (GO:0003824);; Biological Process: polyamine biosynthetic process (GO:0006596);;	K01583|0|pale:102885886|AZIN2, ADC; antizyme inhibitor 2; K01583 arginine decarboxylase [EC:4.1.1.19] (A)	[E]	Amino acid transport and metabolism	Ornithine decarboxylase GN=ODC1 OS=Bos taurus (Bovine) PE=2 SV=1	Arginine decarboxylase {ECO:0000313|EMBL:ELK01999.1} OS=Pteropus alecto (Black flying fox) PE=3 SV=1	Arginine decarboxylase [Pteropus alecto]
gene2582	[E]	Amino acid transport and metabolism	--	K13869|0|umr:103657957|SLC7A11; solute carrier family 7 (anionic amino acid transporter light chain, xc- system), member 11; K13869 solute carrier family 7 (L-type amino acid transporter), member 11 (A)	[E]	Amino acid transport and metabolism	Cystine/glutamate transporter GN=SLC7A11 OS=Pongo abelii (Sumatran orangutan) PE=2 SV=1	Uncharacterized protein {ECO:0000313|Ensembl:ENSAMEP00000011668} OS=Ailuropoda melanoleuca (Giant panda) PE=4 SV=1	PREDICTED: cystine/glutamate transporter isoform X1 [Ursus maritimus]
gene18670	[E]	Amino acid transport and metabolism	Biological Process: cellular amino acid metabolic process (GO:0006520);; Molecular Function: lyase activity (GO:0016829);; Molecular Function: pyridoxal phosphate binding (GO:0030170);;	K01620|0|ecb:100057768|uncharacterized LOC100057768; K01620 threonine aldolase [EC:4.1.2.5] (A)	[E]	Amino acid transport and metabolism	--	Uncharacterized protein {ECO:0000313|Ensembl:ENSECAP00000005176} (Fragment) OS=Equus caballus (Horse) PE=4 SV=1	PREDICTED: uncharacterized protein R102.4-like [Ceratotherium simum simum]
