# Supplementary material for: Transcriptomic analysis identifies genes and pathways related to myrmecophagy in the Malayan pangolin (Manis javanica)
Source: PeerJ. 2017 Dec 22;5:e4140. doi: 10.7717/peerj.4140 (PMC5742527; doi:10.7717/peerj.4140)
Supplement: File S4 [file peerj-05-4140-s004.xlsx]

## Sheet: Sheet1
#pathway	pathway_id	Gene_number	Gene_id	KOs
Glycolysis / Gluconeogenesis	ko00010	70	Manis_javanica_newGene_12284;Manis_javanica_newGene_5972;gene10090;gene10186;gene1044;gene10656;gene1145;gene1175;gene12977;gene13306;gene13325;gene13573;gene13800;gene14065;gene14316;gene14509;gene1472;gene15073;gene1537;gene1538;gene15895;gene15962;gene16205;gene16206;gene16872;gene17134;gene17249;gene17328;gene17762;gene18209;gene18745;gene19708;gene19941;gene20453;gene20675;gene20765;gene2080…	K00134+K00161+K00016+K01623+K01834+K10705+K00161+K00161+K00627+K00002+K14085+K00844+K01810+K00149+K00850+K00850+K00927+K01689+K13980+K00121+K03103+K03841+K00016+K00016+K00129+K01785+K01834+K01895+K00128+K12406+K15779+K00121+K00128+K13951+K01084+K00128+K00382+K01689+K00850+K01835+K00844+K00129+K15779+K00134+K00850+K00844+K01623+K01803+K01895+K01596+K01596+K01895+K03841+K03841+K12407+K01084+K08074+…
Citrate cycle (TCA cycle)	ko00020	36	Manis_javanica_newGene_3402;Manis_javanica_newGene_4642;Manis_javanica_newGene_5972;gene10590;gene10746;gene10778;gene11259;gene1136;gene11433;gene1145;gene1175;gene12977;gene12981;gene13604;gene13779;gene14099;gene15550;gene15733;gene16902;gene17280;gene19083;gene20804;gene21204;gene22033;gene22906;gene24416;gene26374;gene32;gene3329;gene5471;gene6016;gene6945;gene8389;gene8968;gene9226;gene9969;	K01900+K01900+K00161+K00031+K00164+K00234+K01681+K01681+K01958+K00161+K00161+K00627+K00237+K01647+K00030+K00025+K00164+K01900+K01900+K01900+K00236+K00382+K00658+K01899+K00030+K01679+K00031+K01596+K01596+K00026+K00235+K00162+K00627+K01648+K00030+K00382
Pentose phosphate pathway	ko00030	30	Manis_javanica_newGene_14020;gene10186;gene10528;gene12248;gene12336;gene12903;gene13800;gene14316;gene14509;gene15962;gene17342;gene1756;gene18745;gene19435;gene20937;gene23108;gene24041;gene2454;gene24997;gene25481;gene25556;gene26119;gene5594;gene5595;gene6393;gene7181;gene828;gene9030;gene9192;gene9985;	K01619+K01623+K01053+K00033+K00036+K00615+K01810+K00850+K00850+K03841+K00852+K00615+K15779+K00616+K01807+K00850+K01057+K01835+K15779+K01619+K00850+K01623+K03841+K03841+K01783+K00948+K01623+K00948+K01623+K13937
Pentose and glucuronate interconversions	ko00040	32	Manis_javanica_newGene_10845;Manis_javanica_newGene_13460;Manis_javanica_newGene_5083;Manis_javanica_newGene_8627;gene10854;gene11655;gene11832;gene11860;gene11925;gene13306;gene16754;gene16991;gene17762;gene18545;gene19395;gene19396;gene19705;gene19941;gene20200;gene20765;gene20950;gene21589;gene24918;gene24919;gene25685;gene26478;gene26652;gene5490;gene6393;gene7115;gene7254;gene8057;	K00699+K00699+K00699+K00699+K00012+K00011+K00008+K00078+K00699+K00002+K00963+K13247+K00128+K00699+K00699+K00699+K01195+K00128+K14756+K00128+K00699+K00699+K00699+K00699+K00699+K00699+K00699+K00699+K01783+K00854+K03331+K00699
Fructose and mannose metabolism	ko00051	37	gene10186;gene10625;gene11256;gene11655;gene11832;gene13003;gene13476;gene13573;gene14162;gene14316;gene14509;gene14635;gene15743;gene15962;gene20002;gene23108;gene24116;gene2485;gene25556;gene25847;gene26119;gene26391;gene26971;gene27044;gene3575;gene3699;gene4447;gene5509;gene5594;gene5595;gene71;gene7146;gene7149;gene828;gene8697;gene8911;gene9192;	K01623+K17497+K17497+K00011+K00008+K00976+K01809+K00844+K02377+K00850+K00850+K01103+K01711+K03841+K01103+K00850+K01103+K00844+K00850+K00844+K01623+K01103+K01103+K01803+K00846+K14634+K01711+K00966+K03841+K03841+K00966+K00844+K00844+K01623+K18334+K05305+K01623
Galactose metabolism	ko00052	35	Manis_javanica_newGene_13353;gene10945;gene10946;gene11655;gene1273;gene13573;gene14316;gene14509;gene15319;gene15630;gene15791;gene1587;gene16098;gene16448;gene16754;gene17134;gene17751;gene18745;gene20675;gene23108;gene24470;gene2454;gene2485;gene24997;gene25475;gene25556;gene25847;gene6133;gene6665;gene7146;gene7149;gene715;gene7608;gene895;gene9363;	K12316+K12047+K12047+K00011+K12317+K00844+K00850+K00850+K07966+K07967+K01784+K00849+K12309+K01229+K00963+K01785+K12309+K15779+K01084+K00850+K12316+K01835+K00844+K15779+K00704+K00850+K00844+K12407+K01084+K00844+K00844+K05056+K01203+K01189+K01084
Ascorbate and aldarate metabolism	ko00053	26	Manis_javanica_newGene_10845;Manis_javanica_newGene_13460;Manis_javanica_newGene_5083;Manis_javanica_newGene_8627;gene10528;gene10854;gene11925;gene13325;gene14065;gene17762;gene18545;gene19395;gene19396;gene19941;gene20765;gene20950;gene21589;gene24918;gene24919;gene25685;gene26478;gene26652;gene5490;gene6409;gene7578;gene8057;	K00699+K00699+K00699+K00699+K01053+K00012+K00699+K14085+K00149+K00128+K00699+K00699+K00699+K00128+K00128+K00699+K00699+K00699+K00699+K00699+K00699+K00699+K00699+K00103+K00469+K00699
Fatty acid biosynthesis	ko00061	13	gene11484;gene15509;gene17574;gene19002;gene22268;gene22274;gene24508;gene24606;gene24607;gene25285;gene3594;gene9225;gene9230;	K11262+K11262+K01897+K01897+K01897+K11262+K01897+K00665+K00665+K09458+K00645+K15013+K01897
Fatty acid elongation	ko00062	25	Manis_javanica_newGene_5606;Manis_javanica_newGene_9486;gene11793;gene13271;gene13905;gene14218;gene14225;gene16657;gene16969;gene17593;gene17966;gene17973;gene20721;gene22212;gene2993;gene4455;gene5358;gene5928;gene6084;gene6382;gene6990;gene7392;gene8586;gene9019;gene9020;	K07509+K17360+K07508+K07509+K10250+K10251+K07512+K00022+K10248+K17360+K10247+K10203+K10703+K01074+K10249+K07515+K17360+K01074+K10258+K10205+K10244+K07511+K10703+K01068+K01068
Fatty acid degradation	ko00071	48	Manis_javanica_newGene_10472;Manis_javanica_newGene_11976;Manis_javanica_newGene_13402;Manis_javanica_newGene_13531;Manis_javanica_newGene_5606;Manis_javanica_newGene_9458;Manis_javanica_newGene_9916;gene11286;gene11793;gene11900;gene12105;gene12517;gene12695;gene13238;gene13271;gene13325;gene14065;gene14755;gene15065;gene1537;gene1538;gene1578;gene16070;gene16657;gene17574;gene17762;gene17936;ge…	K13239+K13239+K00626+K00626+K07509+K00626+K13239+K00252+K07508+K08765+K00626+K07513+K09479+K00249+K07509+K14085+K00149+K08765+K00232+K13980+K00121+K00232+K17687+K00022+K01897+K00128+K13238+K08765+K01897+K07514+K00121+K00128+K08766+K13951+K00128+K01897+K00626+K00232+K01897+K00626+K13239+K09478+K07515+K00255+K07511+K15013+K01897+K00248
Synthesis and degradation of ketone bodies	ko00072	14	Manis_javanica_newGene_13402;Manis_javanica_newGene_13531;Manis_javanica_newGene_9458;gene11690;gene12105;gene12574;gene15792;gene22270;gene24287;gene25808;gene3006;gene3208;gene3466;gene848;	K00626+K00626+K00626+K01641+K00626+K01027+K01640+K00626+K01027+K00626+K01640+K01641+K00019+K00019
Steroid biosynthesis	ko00100	21	gene11781;gene13734;gene13930;gene14305;gene15872;gene1785;gene19945;gene20276;gene217;gene25153;gene25562;gene26734;gene27136;gene2750;gene3536;gene5084;gene6116;gene6507;gene6634;gene8287;gene8527;	K00511+K00801+K07748+K00637+K01824+K07750+K00227+K01852+K07438+K07419+K12298+K00227+K05917+K07436+K00637+K01052+K09828+K00213+K07750+K00222+K13373
Primary bile acid biosynthesis	ko00120	20	Manis_javanica_newGene_11693;Manis_javanica_newGene_8788;gene10683;gene10935;gene13317;gene13340;gene15200;gene17719;gene19066;gene19348;gene2123;gene23149;gene2961;gene3291;gene3980;gene5085;gene5121;gene6858;gene6942;gene9032;	K12405+K12405+K00489+K12405+K01796+K00251+K08764+K07430+K08748+K12405+K12408+K07439+K00488+K07439+K08764+K10223+K11992+K07440+K10214+K07431
Ubiquinone and other terpenoid-quinone biosynthesis	ko00130	10	gene14392;gene16934;gene20067;gene2129;gene21751;gene25515;gene2854;gene5727;gene5846;gene9490;	K00355+K10106+K06126+K05357+K00815+K06125+K00457+K00591+K06134+K06127
Steroid hormone biosynthesis	ko00140	68	Manis_javanica_newGene_10455;Manis_javanica_newGene_10845;Manis_javanica_newGene_11470;Manis_javanica_newGene_11472;Manis_javanica_newGene_11641;Manis_javanica_newGene_11645;Manis_javanica_newGene_12373;Manis_javanica_newGene_13460;Manis_javanica_newGene_13649;Manis_javanica_newGene_13742;Manis_javanica_newGene_5083;Manis_javanica_newGene_8627;Manis_javanica_newGene_8911;Manis_javanica_newGene_95…	K01131+K00699+K07424+K07424+K07424+K07424+K07409+K00699+K07424+K01131+K00699+K00699+K07424+K07414+K00489+K00497+K00699+K13368+K12345+K12343+K00251+K13369+K10251+K12344+K07412+K07430+K00545+K07414+K00699+K00699+K00699+K07413+K07424+K07413+K00512+K00699+K10207+K00699+K07424+K07424+K00044+K01131+K07424+K07410+K00699+K00699+K07424+K00699+K07434+K07408+K07409+K13370+K00699+K01131+K00699+K07408+K01131+…
Oxidative phosphorylation	ko00190	136	Manis_javanica_newGene_11482;Manis_javanica_newGene_241;Manis_javanica_newGene_2860;Manis_javanica_newGene_5659;Manis_javanica_newGene_6071;Manis_javanica_newGene_7990;Manis_javanica_newGene_8282;gene1016;gene10178;gene10430;gene10527;gene10658;gene10778;gene11078;gene11085;gene11188;gene1140;gene11429;gene11562;gene11720;gene11807;gene12265;gene12326;gene12327;gene12560;gene12590;gene12629;gene1…	K01507+K00415+K02153+K00415+K11353+K03934+K00414+K02148+K03967+K02153+K11351+K01542+K00234+K02134+K03940+K02259+K03962+K02155+K01543+K02144+K02150+K01507+K03953+K03662+K02265+K02258+K02149+K02129+K02267+K00237+K03934+K03936+K03943+K02266+K00413+K03952+K03947+K02146+K03959+K03661+K03938+K02154+K03941+K03942+K02135+K02150+K03939+K00419+K02148+K00236+K03935+K02128+K02136+K03956+K00414+K02272+K03945+…
Purine metabolism	ko00230	200	Manis_javanica_newGene_10937;Manis_javanica_newGene_11218;Manis_javanica_newGene_13727;Manis_javanica_newGene_14024;Manis_javanica_newGene_175;Manis_javanica_newGene_2928;Manis_javanica_newGene_3791;Manis_javanica_newGene_4;Manis_javanica_newGene_6503;gene10;gene10056;gene1013;gene10266;gene10292;gene10401;gene10516;gene1081;gene11199;gene11216;gene11258;gene1152;gene11718;gene11942;gene11952;gen…	K01487+K01081+K02321+K01488+K01522+K00856+K00856+K13755+K01522+K18437+K07127+K00940+K12321+K01513+K00939+K00942+K01519+K13755+K01081+K03022+K03016+K08718+K03024+K03023+K02328+K01490+K01081+K03002+K13756+K12319+K13298+K00939+K13760+K08042+K03504+K03019+K13296+K00940+K02320+K03010+K02321+K00940+K03000+K13755+K08041+K00106+K12324+K01081+K01081+K14721+K00940+K00940+K13762+K00962+K00939+K00939+K13761+…
Caffeine metabolism	ko00232	7	Manis_javanica_newGene_12373;gene12640;gene15288;gene24055;gene25354;gene25921;gene26155;	K07409+K00622+K00106+K00365+K00622+K07409+K00106
Pyrimidine metabolism	ko00240	111	Manis_javanica_newGene_11218;Manis_javanica_newGene_13727;Manis_javanica_newGene_3489;Manis_javanica_newGene_4902;Manis_javanica_newGene_9105;gene1013;gene10344;gene10568;gene1081;gene10859;gene11216;gene11258;gene11390;gene1144;gene1152;gene11942;gene11952;gene12203;gene12679;gene12759;gene13253;gene13435;gene1357;gene13571;gene1375;gene13916;gene13993;gene14002;gene14068;gene14640;gene15938;gen…	K01081+K02321+K00207+K01464+K01464+K00940+K01489+K01431+K01519+K01937+K01081+K03022+K00943+K00384+K03016+K03024+K03023+K02328+K01081+K03002+K03504+K03019+K01937+K00940+K02320+K03010+K02321+K00940+K00876+K03000+K01081+K01081+K13800+K14721+K00940+K00940+K00962+K00757+K02325+K03006+K00207+K00384+K03027+K03020+K03011+K00857+K03005+K13421+K02999+K01511+K03012+K01081+K02324+K00940+K00207+K03021+K03008+…
Alanine, aspartate and glutamate metabolism	ko00250	39	gene10623;gene10755;gene11006;gene11047;gene11409;gene11667;gene1192;gene12288;gene1267;gene12751;gene13056;gene13637;gene14154;gene14344;gene15070;gene16231;gene16894;gene17425;gene18307;gene19971;gene20928;gene21119;gene21611;gene21756;gene23228;gene265;gene3034;gene3220;gene3566;gene4323;gene477;gene6509;gene753;gene7783;gene8029;gene8790;gene8833;gene9238;gene9578;	K13524+K00139+K01940+K18311+K00830+K01425+K00820+K01580+K00814+K00272+K00814+K01755+K01425+K01580+K18311+K01915+K00827+K13566+K00820+K00261+K14454+K03334+K18309+K01580+K00139+K14455+K14592+K00294+K11540+K01425+K01437+K01940+K01953+K00764+K18310+K00820+K01948+K01939+K01939
Glycine, serine and threonine metabolism	ko00260	45	Manis_javanica_newGene_13255;gene0;gene1;gene10129;gene10146;gene1044;gene11087;gene11409;gene11540;gene11820;gene13325;gene13726;gene14678;gene15604;gene15610;gene16673;gene16894;gene17249;gene18670;gene19097;gene20804;gene21034;gene22287;gene22765;gene23363;gene23434;gene23607;gene24375;gene24376;gene24421;gene25117;gene25541;gene27148;gene3209;gene4124;gene4691;gene4919;gene6663;gene7078;gene7…	K00276+K00274+K00274+K00314+K00315+K01834+K00542+K00830+K00281+K00613+K14085+K00108+K15789+K15788+K00643+K01079+K00827+K01834+K01620+K00306+K00382+K00605+K00274+K00281+K00600+K00273+K00276+K17989+K17989+K01758+K00544+K00314+K00643+K00058+K12235+K01697+K00639+K00276+K00552+K00600+K00831+K02437+K01837+K00049+K00382
Cysteine and methionine metabolism	ko00270	41	Manis_javanica_newGene_11765;Manis_javanica_newGene_8815;gene10090;gene12474;gene12738;gene13510;gene14099;gene14220;gene14800;gene15010;gene15384;gene16106;gene16154;gene16205;gene16206;gene16368;gene16935;gene18308;gene18753;gene20928;gene21119;gene21751;gene2193;gene2275;gene24375;gene24376;gene24421;gene25117;gene2529;gene265;gene2977;gene3168;gene3925;gene4691;gene4895;gene4896;gene5471;gene…	K08967+K09880+K00016+K01251+K00789+K00789+K00025+K09880+K08963+K00548+K00456+K00548+K00548+K00016+K00016+K09880+K00789+K00548+K01251+K14454+K03334+K00815+K00772+K01611+K17989+K17989+K01758+K00544+K17399+K14455+K01251+K00797+K17398+K01697+K01011+K01011+K00026+K00016+K08964+K00558+K00802
Valine, leucine and isoleucine degradation	ko00280	65	Manis_javanica_newGene_13402;Manis_javanica_newGene_13531;Manis_javanica_newGene_4221;Manis_javanica_newGene_5606;Manis_javanica_newGene_8130;Manis_javanica_newGene_9313;Manis_javanica_newGene_9458;gene10077;gene10623;gene1100;gene11690;gene11793;gene11854;gene12105;gene12517;gene12574;gene13084;gene13238;gene13271;gene13325;gene13413;gene14065;gene15792;gene15880;gene15935;gene16657;gene17762;ge…	K00626+K00626+K00167+K07509+K00167+K05605+K00626+K18660+K13524+K01968+K01641+K07508+K00826+K00626+K07513+K01027+K00253+K00249+K07509+K14085+K01965+K00149+K01640+K00167+K01966+K00022+K00128+K07514+K00166+K00128+K00128+K00382+K01965+K03334+K01847+K09699+K00626+K00140+K05607+K01966+K01027+K05605+K00626+K00826+K01847+K00020+K01640+K09478+K01641+K01907+K00157+K00157+K00157+K07515+K08683+K01847+K01969+…
Valine, leucine and isoleucine biosynthesis	ko00290	5	gene11854;gene24375;gene24376;gene26054;gene8542;	K00826+K17989+K17989+K00826+K00826
Lysine biosynthesis	ko00300	2	gene13325;gene15925;	K14085+K00825
Lysine degradation	ko00310	66	Manis_javanica_newGene_11317;Manis_javanica_newGene_11318;Manis_javanica_newGene_13402;Manis_javanica_newGene_13531;Manis_javanica_newGene_13929;Manis_javanica_newGene_4662;Manis_javanica_newGene_9458;gene10159;gene10336;gene10746;gene11088;gene11286;gene12006;gene12105;gene12350;gene12966;gene13325;gene14065;gene1418;gene14817;gene15550;gene15787;gene15925;gene15985;gene16457;gene16657;gene16867…	K11431+K11431+K00626+K00626+K15588+K14157+K00626+K15588+K09189+K00164+K00474+K00252+K11423+K00626+K11420+K14959+K14085+K00149+K14157+K18494+K00164+K11420+K00825+K00471+K11420+K00022+K11429+K15588+K00128+K11431+K06101+K11421+K00306+K07514+K11419+K11428+K09187+K11703+K00128+K00474+K00128+K09186+K00658+K11422+K11424+K00626+K00473+K18826+K11703+K00626+K11429+K11420+K06101+K11422+K07515+K13645+K11427+…
Arginine and proline metabolism	ko00330	64	gene0;gene1;gene1037;gene10533;gene10905;gene11006;gene11087;gene11109;gene11511;gene11637;gene11667;gene11725;gene11820;gene1242;gene12637;gene12958;gene13228;gene13325;gene13369;gene13637;gene13946;gene14065;gene14154;gene14163;gene14335;gene15464;gene15910;gene16231;gene17762;gene17983;gene19797;gene19798;gene19941;gene19971;gene20672;gene20765;gene20928;gene21327;gene22155;gene22287;gene2275;…	K00274+K00274+K18123+K00472+K12259+K01940+K00542+K18384+K00611+K00933+K01425+K11142+K00613+K01476+K01476+K11394+K01583+K14085+K13240+K01755+K00286+K00149+K01425+K00286+K00819+K00657+K00472+K01915+K00128+K00933+K05604+K08660+K00128+K00261+K11067+K00128+K14454+K01480+K00933+K00274+K01611+K00273+K14677+K14455+K01480+K01480+K00797+K00294+K00933+K01581+K11182+K13242+K01425+K00657+K14755+K00472+K01940+…
Histidine metabolism	ko00340	24	Manis_javanica_newGene_7661;gene0;gene1;gene10546;gene13325;gene14065;gene14339;gene16032;gene16033;gene16872;gene17762;gene19797;gene19798;gene19941;gene20274;gene20428;gene20765;gene22287;gene24968;gene25905;gene25978;gene4155;gene477;gene5341;	K01590+K00274+K00274+K00546+K14085+K00149+K01712+K01745+K01468+K00129+K00128+K05604+K08660+K00128+K13990+K01593+K00128+K00274+K00129+K01590+K01590+K11182+K01437+K14755
Tyrosine metabolism	ko00350	35	Manis_javanica_newGene_13255;gene0;gene1;gene10128;gene13806;gene13968;gene1537;gene1538;gene16286;gene16872;gene17833;gene19558;gene19708;gene20428;gene20453;gene20708;gene20928;gene21119;gene21751;gene22122;gene22287;gene23607;gene24968;gene2512;gene26136;gene265;gene26928;gene2854;gene3032;gene389;gene3917;gene3918;gene3919;gene4101;gene6663;	K00276+K00274+K00274+K00503+K00506+K00501+K13980+K00121+K01827+K00129+K00545+K01555+K00121+K01593+K13951+K00431+K14454+K03334+K00815+K01557+K00274+K00276+K00129+K00553+K01800+K14455+K07253+K00457+K00505+K00451+K00157+K00157+K00157+K01800+K00276
Phenylalanine metabolism	ko00360	21	Manis_javanica_newGene_13255;Manis_javanica_newGene_13705;Manis_javanica_newGene_13864;gene0;gene1;gene10317;gene16872;gene18507;gene20428;gene20625;gene20928;gene21119;gene21751;gene22287;gene23607;gene24968;gene25702;gene265;gene26928;gene2854;gene6663;	K00276+K00628+K00500+K00274+K00274+K00500+K00129+K15517+K01593+K00628+K14454+K03334+K00815+K00274+K00276+K00129+K11188+K14455+K07253+K00457+K00276
Tryptophan metabolism	ko00380	50	Manis_javanica_newGene_10631;Manis_javanica_newGene_10632;Manis_javanica_newGene_12373;Manis_javanica_newGene_13402;Manis_javanica_newGene_13531;Manis_javanica_newGene_9458;gene0;gene1;gene10373;gene10746;gene11286;gene12105;gene12195;gene13325;gene14065;gene14267;gene14906;gene15550;gene15925;gene15989;gene16657;gene17307;gene17762;gene17764;gene18667;gene1910;gene19300;gene19941;gene20428;gene2…	K00453+K00453+K07409+K00626+K00626+K00626+K00274+K00274+K00669+K00164+K00252+K00626+K00502+K14085+K00149+K00452+K00562+K00164+K00825+K00502+K00022+K00486+K00128+K03392+K01432+K07514+K00453+K00128+K01593+K00128+K03334+K00626+K00274+K03781+K07410+K00626+K07408+K07409+K07408+K00157+K00157+K00157+K11182+K07515+K01556+K00816+K07511+K00816+K00463+K00463
Phenylalanine, tyrosine and tryptophan biosynthesis	ko00400	6	Manis_javanica_newGene_13864;gene10317;gene20928;gene21119;gene21751;gene265;	K00500+K00500+K14454+K03334+K00815+K14455
beta-Alanine metabolism	ko00410	40	Manis_javanica_newGene_1183;Manis_javanica_newGene_13255;Manis_javanica_newGene_13771;Manis_javanica_newGene_3489;Manis_javanica_newGene_4902;Manis_javanica_newGene_9105;Manis_javanica_newGene_9313;gene10568;gene10623;gene10905;gene12288;gene13238;gene13325;gene14065;gene14344;gene16872;gene17625;gene17762;gene1910;gene19797;gene19798;gene19941;gene20765;gene21227;gene21756;gene22762;gene23607;ge…	K01578+K00276+K01578+K00207+K01464+K01464+K05605+K01431+K13524+K12259+K01580+K00249+K14085+K00149+K01580+K00129+K00207+K00128+K07514+K05604+K08660+K00128+K00128+K00207+K01580+K00140+K00276+K00129+K05605+K01578+K00207+K00797+K18966+K07515+K01464+K00207+K14755+K00276+K07511+K00802
Taurine and hypotaurine metabolism	ko00430	11	gene12288;gene14344;gene1526;gene15384;gene21756;gene21896;gene21897;gene3621;gene4174;gene5156;gene6000;	K01580+K01580+K01594+K00456+K01580+K18592+K18592+K00681+K18966+K10712+K00681
Selenocompound metabolism	ko00450	21	gene10846;gene1144;gene14906;gene15010;gene16106;gene16154;gene17831;gene18308;gene20650;gene22637;gene22858;gene23812;gene24092;gene24421;gene3012;gene3350;gene5316;gene5857;gene7216;gene728;gene7720;	K01874+K00384+K00562+K00548+K00548+K00548+K00384+K00548+K01874+K13811+K01008+K01763+K01008+K01758+K10837+K13811+K00816+K03341+K00384+K13811+K00816
Cyanoamino acid metabolism	ko00460	7	gene21896;gene21897;gene23363;gene2395;gene3621;gene6000;gene7460;	K18592+K18592+K00600+K05350+K00681+K00681+K00600
D-Glutamine and D-glutamate metabolism	ko00471	4	gene11667;gene14154;gene19971;gene4323;	K01425+K01425+K00261+K01425
D-Arginine and D-ornithine metabolism	ko00472	1	gene23434;	K00273
Glutathione metabolism	ko00480	49	Manis_javanica_newGene_13627;Manis_javanica_newGene_13973;Manis_javanica_newGene_14072;Manis_javanica_newGene_2353;gene10590;gene11725;gene12248;gene12336;gene12478;gene12479;gene14063;gene15541;gene15542;gene15543;gene15544;gene15573;gene16878;gene16904;gene17017;gene17329;gene19589;gene19622;gene20206;gene20802;gene21031;gene21674;gene21896;gene21897;gene23375;gene24589;gene25878;gene25906;gene…	K00799+K00799+K05360+K00799+K00031+K11142+K00033+K00036+K00799+K00799+K00799+K00799+K00799+K00799+K00799+K13299+K00799+K00799+K00383+K01920+K00383+K00799+K01469+K00682+K00432+K00799+K18592+K18592+K00432+K00799+K10807+K11205+K10808+K05361+K00799+K00031+K00799+K00797+K10808+K00681+K01581+K11140+K00432+K11204+K00432+K05360+K00681+K00802+K00432
Starch and sucrose metabolism	ko00500	57	Manis_javanica_newGene_10845;Manis_javanica_newGene_13353;Manis_javanica_newGene_13460;Manis_javanica_newGene_5083;Manis_javanica_newGene_8627;gene10089;gene10292;gene10854;gene10945;gene10946;gene11864;gene11925;gene1262;gene12651;gene1273;gene13573;gene13800;gene15909;gene16549;gene16754;gene18545;gene18579;gene18745;gene19395;gene19396;gene19654;gene19705;gene20200;gene20675;gene20950;gene2108…	K00699+K12316+K00699+K00699+K00699+K00693+K01513+K00012+K12047+K12047+K00693+K00699+K00688+K01196+K12317+K00844+K01810+K11809+K01176+K00963+K00699+K08678+K15779+K00699+K00699+K01513+K01195+K14756+K01084+K00699+K01194+K01194+K00699+K05350+K12316+K01835+K00844+K00699+K00699+K15779+K01196+K00699+K00844+K00699+K00699+K00700+K00699+K12407+K01084+K00844+K00844+K01203+K00699+K00688+K00688+K00700+K01084
N-Glycan biosynthesis	ko00510	56	Manis_javanica_newGene_11204;Manis_javanica_newGene_2227;Manis_javanica_newGene_8679;gene10148;gene10342;gene10469;gene11546;gene1176;gene1229;gene12529;gene12663;gene13023;gene13131;gene13653;gene1478;gene15319;gene15630;gene15698;gene1664;gene17008;gene17361;gene17641;gene17800;gene17867;gene18091;gene18119;gene18198;gene18687;gene18701;gene19451;gene20266;gene21404;gene23135;gene23343;gene2385…	K00721+K03842+K01231+K03850+K12670+K01230+K00717+K00778+K01230+K07151+K00738+K12667+K03847+K01228+K13748+K07966+K07967+K01230+K01231+K12667+K00736+K03842+K01230+K00744+K00738+K07252+K09659+K00721+K12668+K00738+K03846+K03844+K07968+K01231+K12669+K00779+K12669+K00779+K00902+K00726+K00729+K12666+K01001+K09661+K03849+K05546+K07441+K03843+K07151+K03848+K07968+K03845+K00744+K07432+K00737+K09658
Other glycan degradation	ko00511	23	Manis_javanica_newGene_3724;gene12348;gene15450;gene156;gene15793;gene16098;gene17751;gene18204;gene20357;gene23251;gene23317;gene2401;gene25794;gene25795;gene25916;gene26535;gene26784;gene3193;gene4033;gene5006;gene5614;gene8758;gene9870;	K12373+K01186+K12357+K17108+K01206+K12309+K12309+K01201+K14459+K12357+K01227+K12373+K12311+K12311+K12357+K12311+K12311+K01444+K01192+K01191+K01192+K12373+K01206
Mucin type O-Glycan biosynthesis	ko00512	31	Manis_javanica_newGene_4596;gene10157;gene10379;gene10904;gene1209;gene1246;gene15213;gene15575;gene16121;gene17076;gene1780;gene17906;gene21057;gene22024;gene2397;gene24491;gene24710;gene25716;gene2597;gene26023;gene2882;gene2927;gene3727;gene4141;gene4298;gene4822;gene504;gene6443;gene8630;gene8909;gene9666;	K00710+K00710+K03479+K00780+K00710+K09662+K00710+K09653+K00727+K00731+K00710+K00710+K00710+K00710+K09663+K00739+K00710+K00710+K00710+K00710+K00710+K00710+K00710+K00710+K09905+K00710+K00710+K00710+K00710+K03368+K00710
Other types of O-glycan biosynthesis	ko00514	36	gene10443;gene1176;gene13146;gene15061;gene15319;gene15447;gene15630;gene15635;gene17793;gene19915;gene21948;gene23078;gene23135;gene24039;gene24477;gene25693;gene25744;gene25884;gene26176;gene3508;gene4102;gene4457;gene4530;gene4906;gene5813;gene6515;gene6618;gene7256;gene744;gene7745;gene7766;gene783;gene7911;gene8088;gene8496;gene9108;	K05948+K00778+K00781+K13676+K07966+K13675+K07967+K00781+K07635+K11703+K00728+K09674+K07968+K11703+K00779+K00728+K13675+K00779+K00735+K09661+K00728+K13676+K13667+K05948+K07632+K03663+K07968+K05948+K13646+K03691+K18134+K00715+K09666+K10157+K09667+K03691
Amino sugar and nucleotide sugar metabolism	ko00520	53	Manis_javanica_newGene_3724;gene10022;gene10095;gene10206;gene10625;gene10739;gene10854;gene11256;gene11428;gene1192;gene13003;gene13097;gene13476;gene13573;gene136;gene13800;gene14162;gene15743;gene15791;gene1587;gene16754;gene17267;gene17798;gene18307;gene18376;gene18397;gene18579;gene18745;gene19600;gene19791;gene22863;gene236;gene23838;gene23847;gene2401;gene2454;gene2485;gene24997;gene25847;…	K12373+K00621+K00983+K00972+K17497+K01836+K00012+K17497+K01443+K00820+K00976+K01183+K01809+K00844+K12409+K01810+K02377+K01711+K01784+K00849+K00963+K02564+K00972+K00820+K01787+K01097+K08678+K15779+K02564+K01787+K00326+K01639+K05304+K00326+K12373+K01835+K00844+K15779+K00844+K00326+K01183+K01711+K08080+K00966+K12407+K00966+K00844+K00844+K05056+K12373+K00820+K05305+K00884
Butirosin and neomycin biosynthesis	ko00524	6	gene13573;gene2485;gene25847;gene6133;gene7146;gene7149;	K00844+K00844+K00844+K12407+K00844+K00844
Glycosaminoglycan degradation	ko00531	21	Manis_javanica_newGene_3724;Manis_javanica_newGene_6975;gene10147;gene14192;gene14194;gene14195;gene16098;gene16704;gene17751;gene19192;gene19705;gene20892;gene23050;gene23168;gene23588;gene2401;gene4547;gene6211;gene8758;gene8795;gene9765;	K12373+K10532+K01135+K01197+K01197+K01197+K12309+K01136+K12309+K10532+K01195+K01565+K07965+K01132+K01205+K12373+K01197+K07964+K12373+K01217+K01137
Glycosaminoglycan biosynthesis - chondroitin sulfate / dermatan sulfate	ko00532	24	gene10441;gene12341;gene13086;gene14338;gene14670;gene16210;gene1661;gene1822;gene18851;gene1931;gene20232;gene21247;gene21281;gene22086;gene24802;gene4094;gene4171;gene5151;gene5769;gene7215;gene7232;gene73;gene7762;gene8440;	K04742+K13499+K08105+K07779+K00746+K00771+K08106+K00734+K00746+K00771+K00746+K03193+K13499+K00771+K00733+K03193+K03419+K01794+K10158+K01017+K04743+K00747+K01020+K13499
Glycosaminoglycan biosynthesis - keratan sulfate	ko00533	18	Manis_javanica_newGene_4701;gene10904;gene11546;gene12284;gene13146;gene15319;gene15630;gene15635;gene19273;gene20016;gene21749;gene22539;gene23135;gene24843;gene5577;gene6618;gene6880;gene8909;	K04745+K00780+K00717+K04745+K00781+K07966+K07967+K00781+K07969+K09664+K04746+K01022+K07968+K09671+K00741+K07968+K00741+K03368
Glycosaminoglycan biosynthesis - heparan sulfate / heparin	ko00534	31	Manis_javanica_newGene_4827;gene10462;gene10477;gene10764;gene10918;gene11052;gene1215;gene15205;gene16210;gene17165;gene1822;gene18494;gene18982;gene1931;gene19449;gene2011;gene22086;gene22527;gene22945;gene23306;gene24230;gene24802;gene3895;gene5769;gene608;gene6805;gene7257;gene7369;gene7414;gene8835;gene8964;	K02513+K02577+K02368+K02366+K02579+K02366+K08103+K02513+K00771+K02576+K00734+K02369+K02578+K00771+K01024+K02578+K00771+K02514+K07809+K08104+K02367+K00733+K02370+K10158+K02579+K02367+K02579+K07808+K08102+K08102+K01793
Glycerolipid metabolism	ko00561	60	Manis_javanica_newGene_13915;Manis_javanica_newGene_6056;Manis_javanica_newGene_9778;gene10585;gene11115;gene11655;gene11786;gene12621;gene13306;gene13325;gene13764;gene14065;gene14413;gene15604;gene15640;gene15641;gene17337;gene17338;gene17339;gene17762;gene17772;gene18109;gene18418;gene18999;gene19441;gene19941;gene2004;gene20765;gene21175;gene21884;gene21934;gene21966;gene22291;gene22884;gene2…	K13517+K00901+K13517+K14076+K11155+K00011+K13506+K13517+K00002+K14085+K15728+K00149+K13523+K15788+K11160+K14457+K14075+K14074+K14073+K00128+K00901+K13509+K00901+K00629+K16816+K00128+K00864+K00128+K00901+K01080+K01059+K13517+K15728+K00901+K09881+K13534+K00901+K12298+K00901+K01080+K01080+K00863+K13523+K15728+K01046+K00864+K13509+K00901+K13506+K14452+K01054+K14456+K14457+K13513+K00901+K00629+K00901+…
Inositol phosphate metabolism	ko00562	73	Manis_javanica_newGene_11169;Manis_javanica_newGene_12179;Manis_javanica_newGene_13131;Manis_javanica_newGene_3372;Manis_javanica_newGene_6811;Manis_javanica_newGene_958;gene10243;gene1035;gene10589;gene1095;gene1103;gene1118;gene1133;gene12015;gene13079;gene13407;gene14873;gene14932;gene14983;gene15228;gene15537;gene15895;gene16192;gene17314;gene17532;gene18170;gene18469;gene18833;gene19252;gene…	K01092+K13711+K01099+K00923+K00923+K00911+K01099+K13711+K00921+K00922+K01092+K01109+K01108+K05859+K05858+K01107+K00889+K05857+K13711+K10572+K03084+K03103+K15909+K00888+K00922+K01116+K05858+K01099+K15759+K00923+K00888+K00922+K00999+K00913+K03084+K00920+K15759+K00923+K05861+K00911+K01099+K00140+K03084+K00923+K01106+K00920+K01099+K01099+K05857+K01099+K03084+K01803+K00922+K05857+K01109+K01108+K00889+…
Glycosylphosphatidylinositol(GPI)-anchor biosynthesis	ko00563	31	Manis_javanica_newGene_6965;Manis_javanica_newGene_901;gene10754;gene12158;gene12635;gene12867;gene1317;gene13388;gene1402;gene14949;gene15211;gene15586;gene1838;gene20986;gene21038;gene21554;gene22050;gene22547;gene22699;gene23652;gene25082;gene27002;gene3545;gene3626;gene3802;gene6067;gene6595;gene829;gene8429;gene9618;gene9748;	K05287+K05290+K01127+K08098+K03858+K05310+K05284+K05286+K05285+K05289+K03434+K05288+K05290+K05290+K05283+K05294+K03857+K05292+K05294+K03860+K05287+K05294+K07541+K05293+K05285+K03861+K11001+K05291+K03859+K07542+K09658
Glycerophospholipid metabolism	ko00564	100	Manis_javanica_newGene_13915;Manis_javanica_newGene_4938;Manis_javanica_newGene_6056;Manis_javanica_newGene_7291;Manis_javanica_newGene_9778;gene10104;gene10315;gene10350;gene10351;gene10352;gene10353;gene11310;gene11778;gene11786;gene12152;gene12621;gene1270;gene13373;gene13632;gene13764;gene1378;gene13857;gene13956;gene14136;gene14413;gene14618;gene15042;gene15398;gene15790;gene15967;gene16243;…	K13517+K13511+K00901+K13644+K13517+K00981+K01047+K01047+K01047+K01047+K01047+K14676+K00994+K13506+K13510+K13517+K16342+K14676+K08744+K15728+K00968+K00894+K06129+K06128+K13523+K01115+K13516+K01115+K06130+K16860+K00551+K14156+K01047+K01115+K00006+K00901+K13509+K14621+K00901+K00995+K14156+K00629+K13511+K01049+K00999+K16342+K00901+K00968+K00981+K01080+K13517+K15728+K13515+K00901+K01613+K16342+K16342+…
Ether lipid metabolism	ko00565	46	Manis_javanica_newGene_7291;gene10315;gene10350;gene10351;gene10352;gene10353;gene10476;gene11778;gene12152;gene1270;gene12701;gene14618;gene15398;gene15967;gene17059;gene17141;gene17228;gene18234;gene20557;gene20840;gene21884;gene22446;gene22984;gene22988;gene22990;gene2314;gene23659;gene23912;gene24965;gene25980;gene26968;gene3956;gene4009;gene4070;gene4189;gene4931;gene546;gene5912;gene6036;ge…	K13644+K01047+K01047+K01047+K01047+K01047+K01062+K00994+K13510+K16342+K01122+K01115+K01115+K16860+K01047+K01115+K08743+K14621+K04628+K16342+K01080+K01062+K16342+K16342+K16342+K13510+K01122+K01047+K13512+K18575+K16795+K13644+K00803+K01080+K01080+K16343+K16795+K16860+K16817+K01047+K16794+K13510+K01019+K01047+K01047+K00993
Arachidonic acid metabolism	ko00590	76	Manis_javanica_newGene_11007;Manis_javanica_newGene_11248;Manis_javanica_newGene_11435;Manis_javanica_newGene_12165;Manis_javanica_newGene_12604;Manis_javanica_newGene_12624;Manis_javanica_newGene_13717;Manis_javanica_newGene_7733;Manis_javanica_newGene_8833;Manis_javanica_newGene_8960;gene10315;gene10350;gene10351;gene10352;gene10353;gene12216;gene12645;gene12662;gene12684;gene1270;gene1505;gene…	K17726+K17726+K17726+K17726+K00079+K00079+K07418+K00079+K08022+K00079+K01047+K01047+K01047+K01047+K01047+K00461+K07422+K00807+K00458+K16342+K00509+K17726+K17687+K00079+K01832+K07412+K17726+K00079+K00079+K01047+K11987+K01830+K14621+K00079+K17726+K07413+K07413+K16342+K00432+K08021+K08022+K18592+K18592+K16342+K16342+K16342+K00432+K01254+K01047+K00460+K00458+K00079+K00079+K17726+K17726+K07418+K00432+…
Linoleic acid metabolism	ko00591	36	Manis_javanica_newGene_11470;Manis_javanica_newGene_11472;Manis_javanica_newGene_11641;Manis_javanica_newGene_11645;Manis_javanica_newGene_12373;Manis_javanica_newGene_13649;Manis_javanica_newGene_13717;Manis_javanica_newGene_8911;gene10315;gene10350;gene10351;gene10352;gene10353;gene1270;gene17059;gene18234;gene20280;gene20378;gene20572;gene20840;gene21821;gene22984;gene22988;gene22990;gene23182…	K07424+K07424+K07424+K07424+K07409+K07424+K07418+K07424+K01047+K01047+K01047+K01047+K01047+K16342+K01047+K14621+K07413+K07424+K07413+K16342+K07424+K16342+K16342+K16342+K07424+K01047+K00460+K07424+K07424+K07409+K07418+K16343+K16817+K01047+K01047+K01047
alpha-Linolenic acid metabolism	ko00592	23	gene10315;gene10350;gene10351;gene10352;gene10353;gene12517;gene1270;gene15065;gene1578;gene17059;gene18234;gene18639;gene20840;gene22556;gene22984;gene22988;gene22990;gene23912;gene4931;gene6036;gene6961;gene9332;gene9483;	K01047+K01047+K01047+K01047+K01047+K07513+K16342+K00232+K00232+K01047+K14621+K10226+K16342+K00232+K16342+K16342+K16342+K01047+K16343+K16817+K01047+K01047+K01047
Sphingolipid metabolism	ko00600	55	Manis_javanica_newGene_12269;Manis_javanica_newGene_13789;gene10370;gene12291;gene12348;gene12646;gene15450;gene156;gene16098;gene16710;gene17051;gene17219;gene17527;gene17639;gene17697;gene17751;gene18204;gene1853;gene18738;gene18933;gene19736;gene20557;gene21221;gene21884;gene2198;gene22776;gene22808;gene23251;gene24523;gene25264;gene25290;gene25570;gene25916;gene26287;gene26838;gene3538;gene39…	K04712+K04711+K04718+K04712+K01186+K04714+K12357+K17108+K12309+K04712+K04710+K01441+K04710+K12354+K04715+K12309+K01201+K04710+K01134+K12350+K12353+K04628+K00654+K01080+K04710+K04710+K04708+K12357+K04710+K01441+K12354+K00654+K12357+K00720+K12348+K00654+K12352+K01080+K01080+K04718+K07553+K04716+K04711+K00654+K01202+K12348+K00654+K12349+K04714+K01019+K01189+K00720+K12351+K04717+K01634
Glycosphingolipid biosynthesis - lacto and neolacto series	ko00601	27	gene10098;gene10251;gene11851;gene13146;gene1497;gene15319;gene15630;gene15635;gene17793;gene18709;gene19273;gene19956;gene21243;gene23135;gene24426;gene25359;gene2847;gene529;gene5577;gene5813;gene6515;gene6618;gene6880;gene7880;gene8433;gene9456;gene980;	K03371+K07819+K00718+K00781+K00743+K07966+K07967+K00781+K07635+K03877+K07969+K07633+K03792+K07968+K03371+K07970+K07971+K00718+K00741+K07632+K03663+K07968+K00741+K07820+K00742+K03766+K03494
Glycosphingolipid biosynthesis - globo series	ko00603	16	Manis_javanica_newGene_3724;gene10098;gene10904;gene11851;gene18709;gene22342;gene2401;gene24426;gene24540;gene25564;gene529;gene6515;gene8179;gene8758;gene8909;gene895;	K12373+K03371+K00780+K00718+K03877+K01988+K12373+K03371+K01204+K00722+K00718+K03663+K00719+K12373+K03368+K01189
Glycosphingolipid biosynthesis - ganglio series	ko00604	19	Manis_javanica_newGene_3724;gene10098;gene10904;gene12377;gene16098;gene16923;gene17751;gene18400;gene20641;gene2401;gene24426;gene2458;gene661;gene783;gene8758;gene8909;gene9082;gene9745;gene9746;	K12373+K03371+K00780+K03373+K12309+K03370+K12309+K03372+K00725+K12373+K03371+K03375+K03369+K00715+K12373+K03368+K03373+K03376+K03374
Pyruvate metabolism	ko00620	49	Manis_javanica_newGene_13402;Manis_javanica_newGene_13531;Manis_javanica_newGene_232;Manis_javanica_newGene_5972;Manis_javanica_newGene_9458;gene10090;gene10543;gene10737;gene10895;gene11433;gene1145;gene11484;gene1175;gene12105;gene12977;gene13325;gene14065;gene14099;gene15509;gene16205;gene16206;gene17328;gene17762;gene17985;gene18209;gene19941;gene20765;gene20804;gene22120;gene22270;gene22274;…	K00626+K00626+K00027+K00161+K00626+K00016+K01512+K00029+K01512+K01958+K00161+K11262+K00161+K00626+K00627+K14085+K00149+K00025+K11262+K00016+K00016+K01895+K00128+K01067+K12406+K00128+K00128+K00382+K01069+K00626+K11262+K00027+K01069+K01679+K00626+K00029+K01895+K01596+K01596+K01895+K01759+K00102+K00026+K00162+K00016+K00627+K00873+K00049+K00382
Glyoxylate and dicarboxylate metabolism	ko00630	33	Manis_javanica_newGene_13402;Manis_javanica_newGene_13531;Manis_javanica_newGene_9458;gene1037;gene11259;gene1136;gene11409;gene12105;gene13413;gene13604;gene14099;gene15604;gene15935;gene16231;gene17940;gene18667;gene20868;gene21693;gene22270;gene22531;gene23363;gene235;gene2435;gene25770;gene25808;gene26648;gene3212;gene5471;gene566;gene7460;gene8353;gene8700;gene9296;	K00626+K00626+K00626+K18123+K01681+K01681+K00830+K00626+K01965+K01647+K00025+K15788+K01966+K01915+K01091+K01432+K01965+K01847+K00626+K03781+K00600+K01966+K11517+K01816+K00626+K01847+K11517+K00026+K01847+K00600+K02437+K05606+K00049
Propanoate metabolism	ko00640	44	Manis_javanica_newGene_1183;Manis_javanica_newGene_13402;Manis_javanica_newGene_13531;Manis_javanica_newGene_13771;Manis_javanica_newGene_3402;Manis_javanica_newGene_4642;Manis_javanica_newGene_9313;Manis_javanica_newGene_9458;gene10090;gene10623;gene11484;gene12105;gene13238;gene13413;gene15509;gene15733;gene15755;gene15935;gene16205;gene16206;gene16902;gene17280;gene17328;gene1910;gene20868;gen…	K01578+K00626+K00626+K01578+K01900+K01900+K05605+K00626+K00016+K13524+K11262+K00626+K00249+K01965+K11262+K01900+K01908+K01966+K00016+K00016+K01900+K01900+K01895+K07514+K01965+K01847+K01899+K00626+K11262+K00140+K01966+K05605+K00626+K01847+K01578+K01895+K01895+K07515+K01847+K18426+K00016+K07511+K18426+K05606
Butanoate metabolism	ko00650	32	Manis_javanica_newGene_13402;Manis_javanica_newGene_13531;Manis_javanica_newGene_9458;gene10623;gene10755;gene11690;gene11812;gene1183;gene12105;gene12288;gene12550;gene12574;gene14344;gene15792;gene16657;gene1910;gene21572;gene21756;gene22270;gene23228;gene24150;gene24287;gene24399;gene25808;gene3006;gene3208;gene3466;gene3840;gene4455;gene7392;gene848;gene9497;	K00626+K00626+K00626+K13524+K00139+K01641+K01896+K00109+K00626+K01580+K01896+K01027+K01580+K01640+K00022+K07514+K01896+K01580+K00626+K00139+K01896+K01027+K01896+K00626+K01640+K01641+K00019+K01907+K07515+K07511+K00019+K00248
One carbon pool by folate	ko00670	22	gene13665;gene15010;gene1547;gene16106;gene16154;gene17996;gene18308;gene19552;gene20274;gene21034;gene22217;gene2291;gene23276;gene23363;gene3908;gene4112;gene7460;gene8340;gene8442;gene8683;gene8696;gene9466;	K13403+K00548+K13402+K00548+K00548+K00602+K00548+K01934+K13990+K00605+K00289+K00289+K00297+K00600+K00288+K00604+K00600+K00287+K00288+K11787+K00560+K13403
Thiamine metabolism	ko00730	6	Manis_javanica_newGene_4775;Manis_javanica_newGene_7983;Manis_javanica_newGene_9944;gene18575;gene24310;gene449;	K00949+K00949+K00949+K06928+K05307+K04487
Riboflavin metabolism	ko00740	12	gene10292;gene10666;gene11136;gene15972;gene18187;gene19654;gene22345;gene22393;gene24690;gene25623;gene25953;gene3032;	K01513+K14379+K00861+K05901+K00953+K01513+K14410+K14394+K14395+K14410+K14410+K00505
Vitamin B6 metabolism	ko00750	8	gene14369;gene20169;gene3917;gene3918;gene3919;gene4913;gene7625;gene814;	K00868+K13248+K00157+K00157+K00157+K07758+K00831+K00275
Nicotinate and nicotinamide metabolism	ko00760	36	Manis_javanica_newGene_11218;Manis_javanica_newGene_3686;Manis_javanica_newGene_5675;gene10292;gene11216;gene12679;gene12703;gene13519;gene14166;gene14680;gene15671;gene15938;gene15977;gene1845;gene19015;gene19654;gene20556;gene20702;gene21864;gene21980;gene22094;gene24490;gene25494;gene25931;gene26167;gene26205;gene3893;gene3917;gene3918;gene3919;gene5319;gene620;gene6508;gene6652;gene9562;gene9…	K01081+K06210+K01242+K01513+K01081+K01081+K10524+K00541+K00763+K18152+K00767+K01081+K01081+K03462+K01242+K01513+K01081+K06210+K01081+K03426+K06210+K06210+K06210+K01950+K10524+K03783+K01081+K00157+K00157+K00157+K00323+K01081+K01950+K00323+K00323+K00858
Pantothenate and CoA biosynthesis	ko00770	31	Manis_javanica_newGene_3489;Manis_javanica_newGene_4902;Manis_javanica_newGene_9105;gene10276;gene10277;gene10292;gene10568;gene11045;gene11854;gene14481;gene1739;gene17625;gene17675;gene19175;gene19654;gene20358;gene21227;gene23590;gene24455;gene26054;gene26688;gene2890;gene3364;gene4174;gene4555;gene4776;gene5983;gene5984;gene8542;gene8902;gene9581;	K00207+K01464+K01464+K08069+K08069+K01513+K01431+K01922+K00826+K09680+K01598+K00207+K06133+K09680+K01513+K06133+K00207+K02318+K09680+K00826+K09680+K00207+K09680+K18966+K01464+K00207+K09680+K09680+K00826+K08069+K09680
Biotin metabolism	ko00780	3	gene10241;gene14487;gene25285;	K01942+K01435+K09458
Lipoic acid metabolism	ko00785	3	gene13252;gene23356;gene25480;	K03801+K03644+K10105
Folate biosynthesis	ko00790	12	gene11727;gene12985;gene2137;gene21461;gene23807;gene24343;gene2559;gene3863;gene466;gene8340;gene8662;gene9742;	K00357+K01737+K01307+K01077+K03635+K00072+K01495+K01077+K01737+K00287+K03639+K01930
Retinol metabolism	ko00830	65	Manis_javanica_newGene_10845;Manis_javanica_newGene_11470;Manis_javanica_newGene_11472;Manis_javanica_newGene_11641;Manis_javanica_newGene_11645;Manis_javanica_newGene_12373;Manis_javanica_newGene_13460;Manis_javanica_newGene_13649;Manis_javanica_newGene_5083;Manis_javanica_newGene_8627;Manis_javanica_newGene_8911;gene1093;gene11115;gene11922;gene11923;gene11925;gene13629;gene13974;gene14247;gene…	K00699+K07424+K07424+K07424+K07424+K07409+K00699+K07424+K00699+K00699+K07424+K11157+K11155+K07437+K12665+K00699+K12664+K13369+K11146+K13980+K00121+K17687+K07249+K11149+K07412+K09516+K00699+K15734+K00699+K00699+K00678+K00121+K07420+K07413+K07424+K13951+K07413+K11152+K11153+K00699+K00699+K07424+K07424+K07424+K00699+K00699+K07424+K00699+K07408+K07409+K00699+K00699+K07408+K11147+K11151+K11158+K07249+…
Porphyrin and chlorophyll metabolism	ko00860	46	Manis_javanica_newGene_10845;Manis_javanica_newGene_11142;Manis_javanica_newGene_13460;Manis_javanica_newGene_13978;Manis_javanica_newGene_5083;Manis_javanica_newGene_8627;gene11188;gene11489;gene11535;gene11925;gene12998;gene15610;gene15972;gene16030;gene18006;gene18545;gene19395;gene19396;gene19705;gene19824;gene20126;gene20127;gene20950;gene21539;gene21589;gene22944;gene24546;gene24547;gene245…	K00699+K14163+K00699+K01698+K00699+K00699+K02259+K00798+K00510+K00699+K00510+K00643+K05901+K00228+K01764+K00699+K00699+K00699+K01195+K01772+K13624+K13624+K00699+K01719+K00699+K02257+K14163+K14163+K02257+K00699+K00699+K00699+K14163+K00699+K00699+K14163+K01698+K00643+K01749+K14735+K01885+K00699+K00231+K00214+K00699+K01599
Terpenoid backbone biosynthesis	ko00900	27	Manis_javanica_newGene_13402;Manis_javanica_newGene_13531;Manis_javanica_newGene_9458;gene10689;gene11432;gene11490;gene11690;gene12105;gene13899;gene15725;gene17884;gene18182;gene18210;gene19144;gene19687;gene20875;gene21424;gene22074;gene22270;gene23175;gene24071;gene25808;gene2646;gene3208;gene5355;gene7955;gene9621;	K00626+K00626+K00626+K11778+K08658+K00869+K01641+K00626+K05906+K06013+K05954+K13273+K00787+K00021+K00804+K12504+K12505+K12504+K00626+K01597+K01823+K00626+K05906+K01641+K00587+K05955+K11778
Nitrogen metabolism	ko00910	17	Manis_javanica_newGene_2693;Manis_javanica_newGene_6531;gene12127;gene13275;gene13276;gene13277;gene13278;gene14028;gene160;gene16231;gene1743;gene19971;gene21041;gene24792;gene2794;gene878;gene8833;	K01672+K01672+K01672+K18245+K01672+K01672+K01672+K01672+K01672+K01915+K01672+K00261+K18246+K01672+K01672+K01672+K01948
Sulfur metabolism	ko00920	14	gene11813;gene13738;gene18651;gene19252;gene20942;gene21585;gene22637;gene24915;gene3350;gene4895;gene4896;gene5640;gene728;gene768;	K17218+K17218+K17725+K15759+K15759+K01082+K13811+K00387+K13811+K01011+K01011+K08738+K13811+K08738
Aminoacyl-tRNA biosynthesis	ko00970	53	Manis_javanica_newGene_11142;gene102;gene10846;gene11284;gene11840;gene12716;gene13029;gene13328;gene14896;gene14904;gene1533;gene15403;gene16450;gene16674;gene17;gene18074;gene18254;gene18877;gene19207;gene19805;gene19825;gene20527;gene20567;gene20650;gene21024;gene21141;gene21586;gene21857;gene22057;gene23299;gene24546;gene24547;gene26065;gene26394;gene26655;gene3012;gene3226;gene3362;gene3472;…	K14163+K01883+K01874+K01889+K01870+K01876+K01868+K01869+K01889+K01880+K01876+K01887+K01876+K01868+K02434+K01872+K01867+K01872+K01866+K01868+K01893+K02433+K01873+K01874+K01886+K01868+K01870+K01867+K01868+K04567+K14163+K14163+K01883+K14163+K14163+K10837+K01889+K01887+K01893+K00604+K01892+K01892+K01889+K01885+K03341+K01881+K01875+K01875+K01869+K01866+K02435+K01873+K01890
Metabolism of xenobiotics by cytochrome P450	ko00980	71	Manis_javanica_newGene_10845;Manis_javanica_newGene_12373;Manis_javanica_newGene_12604;Manis_javanica_newGene_12624;Manis_javanica_newGene_13460;Manis_javanica_newGene_13627;Manis_javanica_newGene_13973;Manis_javanica_newGene_2353;Manis_javanica_newGene_5083;Manis_javanica_newGene_7733;Manis_javanica_newGene_8627;Manis_javanica_newGene_8960;gene11860;gene11925;gene12478;gene12479;gene14063;gene15…	K00699+K07409+K00079+K00079+K00699+K00799+K00799+K00799+K00699+K00079+K00699+K00079+K00078+K00699+K00799+K00799+K00799+K13980+K00121+K00799+K00799+K00799+K00799+K13299+K00079+K17685+K17685+K00129+K00799+K00799+K00079+K00079+K01253+K00699+K00079+K00699+K00699+K00799+K00121+K07420+K13951+K00699+K00699+K15303+K00799+K00079+K00079+K07410+K00799+K00699+K00699+K00129+K00699+K07408+K07409+K00799+K00699+…
Drug metabolism - cytochrome P450	ko00982	58	Manis_javanica_newGene_10845;Manis_javanica_newGene_12373;Manis_javanica_newGene_13460;Manis_javanica_newGene_13627;Manis_javanica_newGene_13973;Manis_javanica_newGene_14051;Manis_javanica_newGene_2353;Manis_javanica_newGene_5083;Manis_javanica_newGene_8627;gene0;gene1;gene11035;gene11036;gene11925;gene12478;gene12479;gene14063;gene14604;gene1537;gene1538;gene15541;gene15542;gene15543;gene15544;g…	K00699+K07409+K00699+K00799+K00799+K00485+K00799+K00699+K00699+K00274+K00274+K00485+K00485+K00699+K00799+K00799+K00799+K00485+K13980+K00121+K00799+K00799+K00799+K00799+K13299+K00129+K00799+K00799+K00699+K00699+K00699+K00799+K00121+K13951+K00699+K00485+K00485+K00699+K00799+K00274+K00799+K00699+K00699+K00129+K00699+K07409+K00485+K00799+K00699+K17712+K00699+K00799+K00157+K00157+K00157+K00485+K00699+…
Drug metabolism - other enzymes	ko00983	48	Manis_javanica_newGene_10845;Manis_javanica_newGene_13460;Manis_javanica_newGene_3489;Manis_javanica_newGene_4902;Manis_javanica_newGene_5083;Manis_javanica_newGene_8627;Manis_javanica_newGene_9105;gene10344;gene10568;gene1081;gene11925;gene12640;gene14068;gene14832;gene15288;gene16974;gene17625;gene18399;gene18545;gene18666;gene19158;gene19395;gene19396;gene19705;gene19984;gene20950;gene21227;ge…	K00699+K00699+K00207+K01464+K00699+K00699+K01464+K01489+K01431+K01519+K00699+K00622+K00876+K00569+K00106+K00757+K00207+K01951+K00699+K00857+K13421+K00699+K00699+K01195+K00088+K00699+K00207+K00699+K00876+K01044+K00699+K00699+K00622+K00699+K00106+K00699+K00699+K00857+K03927+K00207+K01464+K00757+K00207+K00760+K00699+K00876+K00088+K00699
Biosynthesis of unsaturated fatty acids	ko01040	23	Manis_javanica_newGene_9486;gene12517;gene14218;gene15065;gene1578;gene17593;gene17973;gene18639;gene19922;gene20286;gene20721;gene22556;gene4455;gene4662;gene5358;gene6084;gene6382;gene6797;gene6990;gene7306;gene8586;gene9019;gene9020;	K17360+K07513+K10251+K00232+K00232+K17360+K10203+K10226+K00507+K00507+K10703+K00232+K07515+K10224+K17360+K10258+K10205+K07753+K10244+K00507+K10703+K01068+K01068
Carbon metabolism	ko01200	123	Manis_javanica_newGene_12284;Manis_javanica_newGene_13402;Manis_javanica_newGene_13531;Manis_javanica_newGene_232;Manis_javanica_newGene_3402;Manis_javanica_newGene_4642;Manis_javanica_newGene_5972;Manis_javanica_newGene_9313;Manis_javanica_newGene_9458;gene10186;gene1044;gene10528;gene10590;gene10737;gene10746;gene10778;gene11259;gene1136;gene11409;gene11433;gene1145;gene11540;gene1175;gene12105…	K00134+K00626+K00626+K00027+K01900+K01900+K00161+K05605+K00626+K01623+K01834+K01053+K00031+K00029+K00164+K00234+K01681+K01681+K00830+K01958+K00161+K00281+K00161+K00626+K00033+K00036+K01070+K00814+K00615+K00627+K00237+K00814+K00249+K00844+K01647+K00030+K01810+K00025+K00850+K00850+K00927+K01689+K00121+K00164+K01900+K03841+K01079+K01900+K01834+K01900+K01895+K00615+K12406+K00236+K07514+K00616+K00121+…
2-Oxocarboxylic acid metabolism	ko01210	18	gene10590;gene11259;gene1136;gene11854;gene1267;gene13056;gene13604;gene13779;gene15925;gene20672;gene20928;gene22906;gene25894;gene26054;gene26374;gene265;gene8542;gene9226;	K00031+K01681+K01681+K00826+K00814+K00814+K01647+K00030+K00825+K11067+K14454+K00030+K14677+K00826+K00031+K14455+K00826+K00030
Fatty acid metabolism	ko01212	55	Manis_javanica_newGene_13402;Manis_javanica_newGene_13531;Manis_javanica_newGene_5606;Manis_javanica_newGene_9458;gene11484;gene11793;gene11900;gene12105;gene12517;gene12695;gene13238;gene13271;gene14218;gene14225;gene14755;gene15065;gene15509;gene1578;gene16657;gene17574;gene17973;gene18639;gene18735;gene19002;gene1910;gene19922;gene20049;gene20286;gene20721;gene22212;gene22268;gene22270;gene222…	K00626+K00626+K07509+K00626+K11262+K07508+K08765+K00626+K07513+K09479+K00249+K07509+K10251+K07512+K08765+K00232+K11262+K00232+K00022+K01897+K10203+K10226+K08765+K01897+K07514+K00507+K08766+K00507+K10703+K01074+K01897+K00626+K11262+K00232+K01897+K00665+K00665+K09458+K00626+K09478+K00645+K07515+K10224+K01074+K10258+K10205+K00255+K07753+K10244+K00507+K07511+K10703+K15013+K01897+K00248
Degradation of aromatic compounds	ko01220	4	gene10528;gene13306;gene1538;gene19708;	K01053+K00002+K00121+K00121
Biosynthesis of amino acids	ko01230	79	Manis_javanica_newGene_12284;Manis_javanica_newGene_13864;gene10186;gene10317;gene1044;gene10590;gene11006;gene11259;gene1136;gene11433;gene11511;gene11854;gene1242;gene12637;gene1267;gene12738;gene12903;gene13056;gene13325;gene13510;gene13604;gene13637;gene13779;gene13946;gene14163;gene14316;gene14509;gene1472;gene15010;gene15073;gene15925;gene16106;gene16154;gene16231;gene16673;gene16935;gene17…	K00134+K00500+K01623+K00500+K01834+K00031+K01940+K01681+K01681+K01958+K00611+K00826+K01476+K01476+K00814+K00789+K00615+K00814+K14085+K00789+K01647+K01755+K00030+K00286+K00286+K00850+K00850+K00927+K00548+K01689+K00825+K00548+K00548+K01915+K01079+K00789+K01834+K00615+K12406+K00548+K01620+K00616+K11067+K14454+K01807+K00815+K01689+K00030+K00850+K00600+K17989+K17989+K01758+K00134+K00850+K14677+K00826+…
ABC transporters	ko02010	50	Manis_javanica_newGene_2033;Manis_javanica_newGene_6982;gene10093;gene10810;gene11190;gene11380;gene12192;gene12402;gene12403;gene13782;gene14118;gene15581;gene15995;gene1620;gene16238;gene16427;gene1667;gene16976;gene17422;gene175;gene1752;gene17624;gene17792;gene17933;gene17934;gene18089;gene18925;gene19647;gene20152;gene20514;gene20826;gene21814;gene21815;gene23803;gene24896;gene25642;gene2564…	K05662+K05651+K05033+K05673+K05666+K05677+K05658+K05669+K05665+K05675+K05667+K05649+K05032+K05674+K05648+K05653+K05664+K05647+K05650+K05659+K05656+K05664+K05642+K05643+K05643+K05679+K05657+K05654+K05641+K05668+K05031+K05683+K05684+K05664+K05031+K05654+K05653+K05645+K05681+K05680+K05655+K05662+K05676+K05661+K05678+K05646+K05679+K05644+K05671+K05664
Ribosome biogenesis in eukaryotes	ko03008	91	Manis_javanica_newGene_10388;Manis_javanica_newGene_4897;Manis_javanica_newGene_8501;gene10002;gene10357;gene10768;gene11194;gene11229;gene11253;gene11381;gene11993;gene13255;gene13531;gene13846;gene14259;gene14265;gene14393;gene14503;gene15315;gene15681;gene15904;gene16141;gene16332;gene1644;gene16764;gene17128;gene17161;gene1737;gene1769;gene18239;gene193;gene20102;gene20914;gene21068;gene21421…	K11108+K14572+K14571+K14561+K14572+K14570+K03539+K14557+K12845+K14567+K03097+K01164+K14552+K14570+K14290+K14575+K11883+K14558+K14530+K14563+K11129+K14521+K07562+K14285+K06943+K03097+K14562+K14525+K14538+K14546+K12618+K14527+K11128+K18532+K07562+K14554+K14556+K14569+K14285+K14568+K03538+K14564+K14562+K14570+K14550+K14554+K03685+K14545+K14536+K06943+K13288+K11130+K03685+K07936+K12619+K14555+K14560+…
Ribosome	ko03010	161	Manis_javanica_newGene_10114;Manis_javanica_newGene_10115;Manis_javanica_newGene_10116;Manis_javanica_newGene_11044;Manis_javanica_newGene_11046;Manis_javanica_newGene_13119;Manis_javanica_newGene_13356;Manis_javanica_newGene_4109;Manis_javanica_newGene_4670;Manis_javanica_newGene_473;Manis_javanica_newGene_4794;Manis_javanica_newGene_4944;Manis_javanica_newGene_5435;Manis_javanica_newGene_6399;M…	K02925+K02925+K02925+K02926+K02926+K02978+K02894+K02998+K02981+K02910+K02889+K02870+K02996+K02981+K02981+K02865+K02906+K02894+K02926+K02926+K02873+K02936+K02911+K02987+K02898+K02947+K02959+K02957+K02971+K02993+K02879+K02872+K02949+K02988+K02991+K02881+K02992+K02956+K02865+K02921+K02948+K02908+K02876+K02890+K02997+K02905+K02949+K02908+K02958+K02906+K02910+K02961+K02996+K02927+K02955+K02913+K02980+…
RNA transport	ko03013	211	Manis_javanica_newGene_11697;Manis_javanica_newGene_13556;Manis_javanica_newGene_13965;Manis_javanica_newGene_2246;Manis_javanica_newGene_2295;Manis_javanica_newGene_4380;Manis_javanica_newGene_4913;Manis_javanica_newGene_6464;Manis_javanica_newGene_8997;gene10249;gene10337;gene10439;gene10686;gene10714;gene10897;gene11125;gene1113;gene11194;gene11210;gene11267;gene11552;gene11588;gene11610;gene1…	K14316+K00974+K15516+K14292+K03231+K03242+K14316+K14317+K14316+K03345+K03260+K03253+K03238+K09291+K03754+K14303+K14297+K03539+K03113+K14319+K14328+K14297+K12875+K02516+K00784+K12876+K12883+K12160+K14304+K14328+K12880+K03237+K13126+K13126+K14316+K12160+K12877+K03239+K01164+K13137+K14291+K14312+K13136+K03259+K14310+K14316+K03260+K14290+K03236+K03258+K03113+K13133+K14296+K14323+K14316+K03262+K12878+…
mRNA surveillance pathway	ko03015	100	Manis_javanica_newGene_13685;Manis_javanica_newGene_1976;Manis_javanica_newGene_4332;Manis_javanica_newGene_4796;Manis_javanica_newGene_4914;Manis_javanica_newGene_5509;gene10616;gene1141;gene11552;gene11600;gene11610;gene11945;gene12088;gene12157;gene12303;gene12324;gene12492;gene12677;gene12681;gene13044;gene13684;gene13923;gene14018;gene14447;gene14483;gene14980;gene15158;gene15606;gene15649;g…	K14403+K11584+K11584+K13917+K03267+K03267+K08873+K14403+K14328+K14396+K12875+K12876+K06269+K12883+K06965+K14328+K14376+K13126+K13126+K12877+K14399+K11584+K14411+K14404+K14405+K14323+K14398+K14962+K13917+K14376+K14411+K11584+K14406+K14285+K03456+K04354+K04382+K14326+K04382+K11583+K14325+K13917+K06269+K14401+K14397+K11584+K03456+K04354+K15542+K03267+K13025+K11583+K11125+K14328+K13171+K14285+K12877+…
RNA degradation	ko03018	93	Manis_javanica_newGene_1985;Manis_javanica_newGene_5269;Manis_javanica_newGene_6420;Manis_javanica_newGene_6823;gene1043;gene11002;gene11201;gene11261;gene11679;gene11911;gene11971;gene12012;gene12298;gene12620;gene12677;gene12681;gene12742;gene12927;gene13106;gene13606;gene14113;gene14316;gene14418;gene14509;gene14816;gene14829;gene15045;gene15073;gene15952;gene16132;gene16372;gene16812;gene1697…	K12626+K01148+K12614+K12607+K07573+K03679+K12624+K14443+K03678+K12615+K12603+K12593+K12605+K12611+K13126+K13126+K03514+K04077+K12600+K12571+K14443+K00850+K12617+K00850+K14443+K12581+K12580+K01689+K03681+K12604+K12614+K12600+K00962+K12623+K12610+K12613+K12603+K03514+K12622+K12587+K14443+K12618+K12590+K12625+K12615+K12607+K12627+K12585+K12598+K10643+K01689+K00850+K12597+K12616+K12600+K00850+K12604+…
RNA polymerase	ko03020	29	gene11258;gene1152;gene11942;gene11952;gene12759;gene13435;gene13916;gene14640;gene16269;gene17470;gene18050;gene18174;gene18380;gene18795;gene19483;gene20495;gene21319;gene21511;gene23769;gene24024;gene26082;gene3736;gene4925;gene5369;gene5782;gene7276;gene8407;gene8803;gene9857;	K03022+K03016+K03024+K03023+K03002+K03019+K03010+K03000+K14721+K03006+K03027+K03020+K03011+K03005+K02999+K03012+K03021+K03008+K03024+K03025+K03013+K03018+K03014+K03026+K03015+K03016+K03004+K03017+K03021
Basal transcription factors	ko03022	53	Manis_javanica_newGene_5128;Manis_javanica_newGene_9351;Manis_javanica_newGene_9878;gene10245;gene12129;gene1245;gene13109;gene13416;gene13920;gene14235;gene14590;gene1471;gene14891;gene16204;gene16424;gene17106;gene17216;gene18411;gene18785;gene18924;gene19564;gene19616;gene19642;gene19920;gene20566;gene20919;gene21071;gene21926;gene22037;gene22566;gene22903;gene24065;gene24737;gene25829;gene269…	K10842+K03137+K03137+K10845+K03128+K03123+K03143+K03122+K03120+K03126+K03125+K03133+K14535+K03141+K14649+K03135+K03138+K14651+K03122+K03130+K03129+K14650+K03124+K03122+K03144+K10842+K02202+K03134+K03142+K03122+K03129+K03120+K10843+K03137+K10845+K03121+K03121+K10844+K03136+K03131+K03131+K03120+K06634+K03132+K10843+K03127+K14650+K03129+K03128+K03130+K03132+K03139+K03135
DNA replication	ko03030	43	Manis_javanica_newGene_13727;gene10103;gene10819;gene11291;gene11324;gene12203;gene12430;gene12585;gene12999;gene13162;gene13253;gene13365;gene1375;gene13993;gene14837;gene15216;gene15936;gene16107;gene16449;gene17079;gene17363;gene19869;gene20585;gene22678;gene23232;gene23466;gene23799;gene2440;gene2486;gene2592;gene25961;gene2887;gene3898;gene4131;gene4317;gene4340;gene4661;gene5336;gene7293;ge…	K02321+K04802+K10754+K10743+K03469+K02328+K10754+K10754+K02209+K10742+K03504+K10756+K02320+K02321+K02212+K02541+K10741+K10754+K02542+K10740+K02325+K10755+K02324+K10747+K10755+K10756+K03111+K10739+K03506+K02326+K10744+K02324+K02685+K07466+K02684+K02210+K04799+K03505+K02324+K02540+K10745+K02685+K02327
Spliceosome	ko03040	141	Manis_javanica_newGene_11299;Manis_javanica_newGene_1985;Manis_javanica_newGene_2764;Manis_javanica_newGene_6172;Manis_javanica_newGene_8264;gene10384;gene10404;gene10503;gene10570;gene10582;gene10607;gene10888;gene11072;gene11201;gene11253;gene11260;gene11307;gene11610;gene11870;gene11945;gene121;gene12111;gene12114;gene12155;gene12157;gene12625;gene12676;gene12753;gene12807;gene12964;gene13044;…	K12890+K12626+K12874+K12863+K12863+K12891+K12828+K11095+K11088+K12893+K12869+K11094+K12889+K12624+K12845+K12834+K12867+K12875+K11093+K12876+K12835+K12824+K12815+K12741+K12883+K12880+K09564+K12816+K12863+K12836+K12877+K12887+K11099+K12890+K12819+K12893+K12888+K12873+K12817+K12863+K12852+K12844+K12878+K12832+K12841+K12865+K12831+K12863+K12849+K12900+K12862+K11098+K12884+K12879+K12879+K12864+K12847+…
Proteasome	ko03050	49	Manis_javanica_newGene_11951;Manis_javanica_newGene_7419;gene10307;gene10851;gene11612;gene11613;gene12023;gene12191;gene123;gene12355;gene13064;gene13883;gene13921;gene13994;gene14395;gene14617;gene14872;gene15501;gene16426;gene17319;gene18361;gene19646;gene20018;gene20922;gene21467;gene21529;gene21718;gene21744;gene22030;gene22474;gene22748;gene23606;gene23943;gene24047;gene24183;gene24654;gene…	K02740+K10881+K02726+K03030+K11598+K02737+K02729+K02739+K03066+K06700+K06699+K02730+K02732+K03063+K03038+K02738+K03029+K03062+K02741+K02736+K03061+K02740+K03032+K02727+K03065+K02735+K04687+K02731+K02731+K03039+K03033+K06698+K02733+K03037+K02735+K02728+K03031+K02741+K03064+K02740+K06696+K06697+K03035+K02725+K11599+K02731+K03036+K03028+K02734
Protein export	ko03060	28	Manis_javanica_newGene_12748;Manis_javanica_newGene_13715;Manis_javanica_newGene_13750;Manis_javanica_newGene_5521;gene1002;gene10029;gene10048;gene12120;gene13074;gene13300;gene15451;gene1574;gene16435;gene16829;gene171;gene1767;gene1788;gene21968;gene24826;gene26678;gene3600;gene3683;gene6249;gene6302;gene7754;gene7780;gene8458;gene976;	K09540+K12948+K09540+K12272+K09647+K13280+K09490+K07342+K03104+K09540+K12947+K03107+K12272+K12275+K03109+K12946+K03105+K09540+K03217+K09540+K13280+K03106+K09481+K10956+K10956+K03108+K09648+K13431
PPAR signaling pathway	ko03320	69	gene10683;gene11024;gene11187;gene11427;gene11900;gene12517;gene1253;gene13238;gene14059;gene14638;gene14755;gene15065;gene15200;gene15728;gene1578;gene17574;gene17705;gene18093;gene18496;gene18499;gene18625;gene18639;gene18735;gene19002;gene19066;gene19088;gene1910;gene19117;gene19922;gene2004;gene20049;gene20286;gene21927;gene21934;gene22268;gene22336;gene22556;gene23020;gene24042;gene24250;gen…	K00489+K08762+K08524+K06276+K08765+K07513+K04504+K00249+K08526+K08746+K08765+K00232+K08764+K08750+K00232+K01897+K07294+K08769+K08754+K08753+K06259+K10226+K08765+K01897+K08748+K08758+K07514+K08752+K00507+K00864+K08766+K00507+K06272+K01059+K01897+K08745+K00232+K01388+K08745+K06086+K01897+K08751+K08763+K08767+K08536+K08746+K00488+K01596+K01596+K08770+K08764+K08768+K08761+K09025+K08759+K08757+K00864+…
Base excision repair	ko03410	40	Manis_javanica_newGene_13007;Manis_javanica_newGene_6018;gene10103;gene11412;gene11483;gene12203;gene12586;gene13253;gene13438;gene13733;gene14559;gene14565;gene14844;gene15443;gene16955;gene17363;gene1776;gene18649;gene18826;gene19325;gene19641;gene20585;gene20901;gene22678;gene23583;gene24560;gene2486;gene2592;gene26098;gene27149;gene2887;gene3192;gene358;gene367;gene4661;gene5007;gene5336;gene…	K10798+K10798+K04802+K02330+K03648+K02328+K10798+K03504+K03652+K10568+K10771+K10798+K10776+K10798+K03512+K02325+K03512+K10803+K03660+K10800+K10803+K02324+K10773+K10747+K10776+K10798+K03506+K02326+K10801+K10772+K02324+K10569+K03575+K10798+K04799+K10567+K03505+K03649+K02324+K02327
Nucleotide excision repair	ko03420	54	Manis_javanica_newGene_5128;gene10103;gene10245;gene10411;gene10819;gene10855;gene11282;gene11660;gene12203;gene12430;gene12585;gene13045;gene13109;gene13253;gene13365;gene1367;gene13931;gene15240;gene15577;gene15936;gene16107;gene16204;gene16540;gene17079;gene17363;gene18453;gene19869;gene20566;gene20585;gene20919;gene21071;gene22037;gene22678;gene23232;gene23466;gene2440;gene24737;gene2486;gene…	K10842+K04802+K10845+K10609+K10754+K10570+K10839+K10838+K02328+K10754+K10754+K10846+K03143+K03504+K10756+K10848+K10840+K10846+K10609+K10741+K10754+K03141+K10839+K10740+K02325+K10838+K10755+K03144+K02324+K10842+K02202+K03142+K10747+K10755+K10756+K10739+K10843+K03506+K02326+K10140+K10841+K10845+K02324+K10844+K10849+K07466+K10610+K03505+K03868+K06634+K02324+K10843+K10847+K02327
Mismatch repair	ko03430	28	gene10103;gene10819;gene10896;gene12203;gene12430;gene12585;gene13253;gene13365;gene1457;gene15936;gene16107;gene16915;gene17079;gene17311;gene17530;gene19869;gene22678;gene23232;gene23466;gene23799;gene2440;gene25125;gene4131;gene4179;gene5336;gene6109;gene8339;gene9695;	K04802+K10754+K08739+K02328+K10754+K10754+K03504+K10756+K10858+K10741+K10754+K08734+K10740+K10746+K08736+K10755+K10747+K10755+K10756+K03111+K10739+K08736+K07466+K08735+K03505+K08737+K08736+K02327
Homologous recombination	ko03440	37	Manis_javanica_newGene_7419;Manis_javanica_newGene_8828;gene1162;gene11745;gene12203;gene12489;gene12555;gene13253;gene15259;gene15936;gene17079;gene17145;gene20247;gene21869;gene22084;gene22681;gene23339;gene23799;gene24173;gene2440;gene24638;gene25466;gene2569;gene26449;gene26594;gene2666;gene26670;gene27056;gene3023;gene4131;gene4149;gene418;gene5336;gene5815;gene584;gene7323;gene9695;	K10881+K10870+K03165+K10869+K02328+K10869+K10880+K03504+K10866+K10741+K10740+K08775+K08991+K10871+K10882+K08991+K10901+K03111+K10877+K10739+K10870+K03165+K10866+K10871+K08775+K10877+K10870+K04482+K10875+K07466+K10869+K10873+K03505+K10865+K10879+K10867+K02327
Non-homologous end-joining	ko03450	19	gene10198;gene11254;gene11341;gene12201;gene13588;gene14838;gene15259;gene16955;gene1776;gene17807;gene19152;gene19770;gene21633;gene2569;gene4661;gene52;gene5815;gene6795;gene8937;	K10885+K10884+K10777+K03513+K06642+K06642+K10866+K03512+K03512+K10886+K06642+K00977+K06642+K10866+K04799+K10980+K10865+K10885+K10887
Fanconi anemia pathway	ko03460	62	Manis_javanica_newGene_8828;gene10046;gene10066;gene11007;gene11361;gene1162;gene12249;gene1255;gene13567;gene1367;gene14006;gene14541;gene1457;gene15587;gene15936;gene16490;gene16626;gene16915;gene17079;gene17145;gene17868;gene18052;gene18515;gene18798;gene18919;gene18971;gene18996;gene20247;gene2049;gene20550;gene21196;gene21610;gene22084;gene22110;gene2222;gene22276;gene22681;gene2280;gene2333…	K10870+K15362+K10888+K15362+K06054+K03165+K11511+K10892+K10890+K10848+K10905+K10896+K10858+K10894+K10741+K13960+K15365+K08734+K10740+K08775+K15361+K03509+K15078+K10990+K11832+K10891+K03511+K08991+K16618+K10993+K10897+K16618+K10882+K11137+K10893+K10898+K08991+K02350+K10901+K10484+K10739+K10889+K10870+K15362+K15362+K03165+K03510+K11137+K08775+K10870+K04482+K10849+K07466+K10605+K03515+K15360+K02350+…
MAPK signaling pathway	ko04010	300	Manis_javanica_newGene_4333;Manis_javanica_newGene_4536;Manis_javanica_newGene_5537;Manis_javanica_newGene_5672;Manis_javanica_newGene_5817;Manis_javanica_newGene_5818;Manis_javanica_newGene_5895;Manis_javanica_newGene_7106;Manis_javanica_newGene_8965;gene10009;gene10161;gene10180;gene10192;gene10238;gene10434;gene10454;gene10474;gene1062;gene10661;gene10669;gene10802;gene11141;gene1117;gene11272…	K04344+K04390+K04346+K04412+K04349+K04349+K09253+K04429+K04412+K04465+K05095+K04371+K04429+K04457+K04459+K04348+K04381+K04377+K04460+K04405+K04427+K04408+K04458+K04344+K04347+K07209+K04421+K04429+K04358+K12457+K07829+K04360+K04364+K04371+K04373+K07210+K04420+K04445+K04426+K16342+K04434+K04389+K04429+K04429+K04355+K04412+K04375+K04458+K04459+K04851+K04358+K04459+K04379+K17333+K04419+K04854+K04859+…
ErbB signaling pathway	ko04012	104	Manis_javanica_newGene_10751;Manis_javanica_newGene_4227;gene10180;gene10269;gene10463;gene1062;gene1095;gene10959;gene12015;gene12177;gene12193;gene12390;gene12422;gene12648;gene13026;gene13287;gene13721;gene14139;gene14155;gene15147;gene15257;gene16024;gene16445;gene17302;gene17532;gene17976;gene18170;gene18185;gene18470;gene18915;gene19030;gene19424;gene19744;gene19765;gene19855;gene19856;gene…	K08887+K06619+K04371+K08845+K04515+K04377+K00922+K09783+K05859+K04364+K04371+K04515+K05085+K04688+K05704+K04375+K17449+K07365+K04515+K04707+K05457+K17448+K04440+K04361+K00922+K04410+K01116+K06279+K02158+K04357+K06619+K02833+K04438+K04364+K09782+K09784+K07205+K00922+K05457+K04707+K09593+K04431+K05733+K05085+K02649+K04409+K05455+K04440+K04369+K04515+K04440+K03099+K02677+K06625+K11223+K03083+K04448+…
Ras signaling pathway	ko04014	250	Manis_javanica_newGene_10444;Manis_javanica_newGene_10751;Manis_javanica_newGene_2317;Manis_javanica_newGene_4227;Manis_javanica_newGene_5817;Manis_javanica_newGene_5818;Manis_javanica_newGene_7420;gene10131;gene10132;gene10161;gene10180;gene10315;gene10350;gene10351;gene10352;gene10353;gene10767;gene10898;gene1095;gene10981;gene11082;gene11193;gene11300;gene11411;gene11555;gene11640;gene11852;ge…	K02183+K08887+K13618+K06619+K04349+K04349+K04538+K04548+K04546+K05095+K04371+K01047+K01047+K01047+K01047+K01047+K05121+K16859+K00922+K05099+K05462+K04163+K04347+K07209+K12380+K07835+K04358+K07829+K05859+K10632+K04364+K04371+K05098+K07210+K17633+K05453+K16342+K04389+K05210+K04375+K05087+K18529+K05087+K14958+K17449+K04358+K04526+K09850+K04362+K12358+K01115+K17633+K08019+K04345+K07825+K05209+K08053+…
Rap1 signaling pathway	ko04015	232	Manis_javanica_newGene_10444;Manis_javanica_newGene_1575;Manis_javanica_newGene_7585;gene10161;gene10174;gene10180;gene10566;gene10767;gene10898;gene10928;gene1095;gene10981;gene11070;gene11082;gene11397;gene11640;gene11728;gene11852;gene11895;gene12193;gene12222;gene12296;gene12475;gene12482;gene12553;gene12823;gene12892;gene13026;gene13079;gene13142;gene13248;gene13291;gene1340;gene13679;gene13…	K02183+K06093+K17701+K05095+K08020+K04371+K04266+K05121+K16859+K05718+K00922+K05099+K05692+K05462+K06082+K07835+K16857+K04358+K07829+K04371+K06461+K05098+K05453+K04630+K06493+K04291+K05210+K05704+K05858+K17704+K08042+K05087+K05087+K05690+K04358+K04294+K04526+K08013+K04630+K04362+K04277+K17698+K17702+K08041+K08019+K05209+K04267+K04527+K06271+K04358+K05689+K04433+K05462+K02183+K17701+K12490+K05209+…
Calcium signaling pathway	ko04020	227	Manis_javanica_newGene_10431;Manis_javanica_newGene_10432;Manis_javanica_newGene_10444;Manis_javanica_newGene_10662;Manis_javanica_newGene_1070;Manis_javanica_newGene_12671;Manis_javanica_newGene_3877;Manis_javanica_newGene_4;Manis_javanica_newGene_4333;Manis_javanica_newGene_5675;Manis_javanica_newGene_8784;Manis_javanica_newGene_958;Manis_javanica_newGene_9888;gene10155;gene10324;gene10370;gene…	K06856+K06856+K02183+K05850+K06856+K02183+K06856+K13755+K04344+K01242+K06856+K00911+K06856+K05850+K07190+K04718+K03916+K04348+K04515+K05849+K04266+K04211+K04137+K04279+K16059+K04961+K04163+K13755+K04344+K15041+K04194+K04963+K04157+K18196+K05859+K05853+K16059+K04515+K04142+K05085+K04603+K04195+K04962+K05858+K04229+K08042+K13240+K04962+K00907+K04226+K04851+K04854+K04515+K04855+K04960+K04348+K05853+…
cGMP-PKG signaling pathway	ko04022	195	Manis_javanica_newGene_10444;Manis_javanica_newGene_10662;Manis_javanica_newGene_13893;Manis_javanica_newGene_5537;Manis_javanica_newGene_5678;Manis_javanica_newGene_6639;Manis_javanica_newGene_7716;gene10091;gene1012;gene10155;gene10180;gene10398;gene10454;gene10547;gene10906;gene1095;gene11415;gene11583;gene12077;gene12088;gene12193;gene12393;gene12482;gene1286;gene12890;gene13079;gene13101;gen…	K02183+K05850+K17332+K04346+K05274+K05274+K05870+K05001+K01540+K05850+K04371+K03916+K04348+K05849+K04137+K00922+K15041+K17332+K05853+K06269+K04371+K04142+K04630+K01538+K12319+K05858+K04265+K01539+K01539+K08042+K09048+K04514+K04936+K13296+K00907+K04941+K04851+K09183+K17333+K04526+K04138+K04630+K04213+K04960+K04348+K07187+K05853+K04959+K08041+K04635+K04136+K12324+K05853+K04853+K01540+K09048+K04527+…
cAMP signaling pathway	ko04024	238	Manis_javanica_newGene_10444;Manis_javanica_newGene_10662;Manis_javanica_newGene_7716;gene1012;gene10155;gene10180;gene1024;gene10463;gene10566;gene10639;gene10652;gene10810;gene1095;gene11060;gene11317;gene11389;gene11627;gene11895;gene12088;gene12193;gene12390;gene12393;gene12482;gene12611;gene1286;gene12892;gene12949;gene13021;gene13039;gene13101;gene1311;gene1312;gene13189;gene13199;gene13248…	K02183+K05850+K05870+K01540+K05850+K04371+K18435+K04515+K04266+K13360+K04328+K05673+K00922+K04204+K05730+K08424+K04587+K07829+K06269+K04371+K04515+K04142+K04630+K04951+K01538+K05210+K04217+K04355+K04962+K04265+K01539+K01539+K04229+K05730+K08042+K09048+K04962+K04514+K13296+K04851+K04734+K04379+K04249+K04515+K04630+K01115+K08041+K04345+K00232+K05209+K06231+K04949+K01115+K04853+K01540+K09048+K00232+…
Cytokine-cytokine receptor interaction	ko04060	232	Manis_javanica_newGene_10293;Manis_javanica_newGene_10852;Manis_javanica_newGene_12514;Manis_javanica_newGene_4536;Manis_javanica_newGene_6686;Manis_javanica_newGene_7031;Manis_javanica_newGene_9294;gene10011;gene10334;gene10428;gene10611;gene10675;gene10772;gene10812;gene10981;gene11343;gene11597;gene11886;gene12035;gene12160;gene12161;gene12296;gene12309;gene12439;gene12440;gene12475;gene12506;…	K05130+K05076+K05073+K04390+K10031+K04671+K05058+K13567+K05405+K10030+K05431+K05079+K05441+K13578+K05099+K05476+K05493+K05454+K05080+K04177+K04180+K05098+K05061+K04176+K04178+K05453+K05471+K05478+K04189+K05164+K04389+K12671+K05416+K05482+K05057+K05141+K05145+K05477+K05073+K05426+K05165+K05415+K05443+K10032+K13376+K05070+K10035+K05480+K05428+K05058+K05475+K05474+K10031+K13377+K04387+K04386+K05508+…
Chemokine signaling pathway	ko04062	199	Manis_javanica_newGene_1119;Manis_javanica_newGene_2248;Manis_javanica_newGene_3657;Manis_javanica_newGene_6686;Manis_javanica_newGene_7420;gene1008;gene10131;gene10132;gene10180;gene10428;gene1095;gene11300;gene11317;gene11411;gene11561;gene11666;gene12160;gene12161;gene12177;gene12193;gene12337;gene12439;gene12440;gene12482;gene12715;gene12915;gene12916;gene13026;gene13079;gene13199;gene13248;g…	K08291+K05854+K05505+K10031+K04538+K05507+K04548+K04546+K04371+K10030+K00922+K04347+K05730+K07209+K00909+K11220+K04177+K04180+K04364+K04371+K07210+K04176+K04178+K04630+K04189+K12671+K05416+K05704+K05858+K05730+K08042+K04514+K11221+K12366+K17449+K04734+K04630+K10032+K04439+K10035+K08041+K04345+K07825+K10031+K05514+K05508+K05514+K04347+K17448+K04188+K04190+K04544+K08291+K10030+K08049+K00922+K04179+…
NF-kappa B signaling pathway	ko04064	102	Manis_javanica_newGene_10431;Manis_javanica_newGene_10432;Manis_javanica_newGene_1070;Manis_javanica_newGene_11255;Manis_javanica_newGene_2248;Manis_javanica_newGene_3877;Manis_javanica_newGene_5895;Manis_javanica_newGene_6686;Manis_javanica_newGene_8784;Manis_javanica_newGene_9888;gene10428;gene10464;gene10802;gene10931;gene11343;gene1138;gene11411;gene11993;gene12015;gene12208;gene12337;gene123…	K06856+K06856+K06856+K04733+K05854+K06856+K09253+K10031+K06856+K06856+K10030+K01348+K04427+K11859+K05476+K12646+K07209+K03097+K05859+K10160+K07210+K05400+K04729+K05477+K16072+K04734+K07368+K07367+K07369+K09253+K10031+K04386+K07371+K10652+K04469+K03097+K12793+K11987+K16072+K10030+K03174+K03173+K01116+K05473+K05856+K07362+K05409+K16065+K10130+K02162+K04730+K04467+K03161+K12964+K06527+K04728+K05855+…
HIF-1 signaling pathway	ko04066	115	Manis_javanica_newGene_10046;Manis_javanica_newGene_5972;gene10180;gene10334;gene10463;gene10767;gene1095;gene1145;gene1175;gene11969;gene12015;gene12193;gene12208;gene12390;gene12648;gene13284;gene13291;gene1340;gene13573;gene13576;gene13967;gene14155;gene1444;gene1447;gene14635;gene15073;gene15477;gene15799;gene16064;gene16436;gene17302;gene17532;gene17690;gene18057;gene18170;gene18819;gene1891…	K09592+K00161+K04371+K05405+K04515+K05121+K00922+K00161+K00161+K02991+K05859+K04371+K10160+K04515+K04688+K16451+K05087+K05087+K00844+K03259+K04526+K04515+K03870+K08268+K01103+K01689+K08008+K04527+K04372+K14736+K04361+K00922+K07299+K05448+K01116+K05465+K04357+K09097+K16366+K05459+K03259+K07205+K00922+K01103+K05437+K05466+K05132+K02649+K03259+K06503+K04687+K01689+K04498+K04369+K02161+K05096+K04515+…
FoxO signaling pathway	ko04068	150	Manis_javanica_newGene_11317;Manis_javanica_newGene_11318;Manis_javanica_newGene_13732;Manis_javanica_newGene_6038;gene10180;gene10269;gene10334;gene10579;gene10629;gene1095;gene10999;gene11076;gene11411;gene11427;gene11899;gene12102;gene12177;gene12193;gene12258;gene12511;gene12698;gene12711;gene12885;gene13259;gene13291;gene13330;gene1340;gene13593;gene13967;gene14333;gene14364;gene14450;gene14…	K11431+K11431+K16332+K07200+K04371+K08845+K05405+K13303+K11838+K00922+K08960+K07298+K07209+K06276+K11434+K04564+K04364+K04371+K04500+K04603+K08341+K10305+K04389+K15010+K05087+K07200+K05087+K04288+K04526+K05443+K10146+K13376+K07187+K12358+K07199+K04293+K10151+K08336+K13377+K04527+K04500+K04402+K04440+K07200+K15010+K17446+K13304+K15010+K04361+K07191+K00922+K05072+K05868+K11431+K11411+K04357+K07199+…
Phosphatidylinositol signaling system	ko04070	99	Manis_javanica_newGene_10444;Manis_javanica_newGene_11169;Manis_javanica_newGene_12179;Manis_javanica_newGene_12671;Manis_javanica_newGene_13131;Manis_javanica_newGene_3372;Manis_javanica_newGene_6056;Manis_javanica_newGene_6811;Manis_javanica_newGene_958;gene10104;gene10243;gene1035;gene10589;gene1095;gene1103;gene1118;gene1133;gene12015;gene13079;gene13407;gene14255;gene14578;gene14873;gene1493…	K02183+K01092+K13711+K02183+K01099+K00923+K00901+K00923+K00911+K00981+K01099+K13711+K00921+K00922+K01092+K01109+K01108+K05859+K05858+K01107+K04960+K04959+K00889+K05857+K13711+K10572+K03084+K15909+K02183+K02183+K00888+K00922+K00901+K01116+K00901+K05858+K01099+K15759+K00923+K00888+K00922+K00999+K00913+K03084+K00920+K15759+K00901+K02649+K02183+K00981+K00923+K05861+K00911+K01099+K00901+K02677+K03084+…
Sphingolipid signaling pathway	ko04071	131	Manis_javanica_newGene_12269;Manis_javanica_newGene_1976;Manis_javanica_newGene_5537;gene10180;gene10370;gene10398;gene1095;gene11427;gene11861;gene12193;gene12291;gene12403;gene12482;gene12568;gene12577;gene12646;gene13079;gene13101;gene13390;gene13593;gene14187;gene14231;gene14618;gene14850;gene15398;gene15459;gene16153;gene16280;gene16710;gene16752;gene16833;gene17015;gene17051;gene17103;gene1…	K04712+K11584+K04346+K04371+K04718+K03916+K00922+K06276+K02159+K04371+K04712+K05665+K04630+K08090+K04426+K04714+K05858+K04265+K04514+K04288+K04630+K04213+K01115+K04293+K01115+K04451+K08089+K11584+K04712+K03456+K04354+K04382+K04710+K04382+K01115+K01441+K18050+K11583+K04710+K00922+K03173+K05858+K04392+K04710+K12350+K07983+K02833+K17388+K00922+K11584+K03456+K04354+K11583+K04513+K04346+K00654+K04295+…
Neuroactive ligand-receptor interaction	ko04080	292	Manis_javanica_newGene_11021;Manis_javanica_newGene_13479;gene10062;gene10158;gene10166;gene10278;gene10279;gene10280;gene10281;gene10282;gene10284;gene10285;gene10287;gene10398;gene10552;gene10566;gene10588;gene10709;gene10832;gene10906;gene10939;gene10941;gene11021;gene11060;gene11124;gene11193;gene11233;gene11418;gene11589;gene11627;gene11628;gene11652;gene11810;gene11866;gene11918;gene12035;g…	K04617+K04276+K04199+K05206+K04201+K05051+K05051+K05051+K05051+K05051+K05051+K05051+K05051+K03916+K04010+K04266+K04586+K04307+K04211+K04137+K04279+K01312+K04588+K04204+K05175+K04163+K04202+K04194+K04811+K04587+K04584+K04157+K04576+K08521+K05190+K05080+K05202+K04608+K05203+K04320+K04142+K04603+K05438+K04195+K04291+K04332+K05175+K05210+K04207+K04217+K04265+K04229+K04307+K04226+K04288+K04294+K04249+…
Cell cycle	ko04110	153	Manis_javanica_newGene_10963;Manis_javanica_newGene_12746;Manis_javanica_newGene_13732;Manis_javanica_newGene_4227;Manis_javanica_newGene_4644;Manis_javanica_newGene_781;Manis_javanica_newGene_9791;gene10103;gene10361;gene1062;gene11554;gene11563;gene11678;gene12067;gene12072;gene12078;gene12258;gene12530;gene12595;gene12622;gene12809;gene12999;gene13012;gene13076;gene13281;gene13501;gene13588;ge…	K06067+K02537+K16332+K06619+K04681+K06621+K06638+K04802+K16197+K04377+K03353+K04683+K06627+K06636+K10500+K03354+K04500+K02216+K17454+K06620+K09389+K02209+K06629+K06637+K04682+K02608+K06642+K06645+K06635+K13376+K06638+K02212+K06642+K06669+K10151+K02365+K02541+K02605+K04451+K13377+K06622+K04500+K06627+K06671+K04402+K10152+K02542+K04681+K03094+K06639+K06628+K05868+K03363+K06067+K12456+K06067+K06636+…
Oocyte meiosis	ko04114	137	Manis_javanica_newGene_10444;Manis_javanica_newGene_12671;Manis_javanica_newGene_12746;Manis_javanica_newGene_1976;Manis_javanica_newGene_4332;gene10180;gene10361;gene10454;gene10463;gene10885;gene10886;gene11554;gene12067;gene12078;gene12088;gene12166;gene12193;gene12196;gene1223;gene12390;gene13248;gene13291;gene1340;gene13923;gene13967;gene14034;gene14155;gene14255;gene1441;gene14578;gene14774…	K02183+K02183+K02537+K11584+K11584+K04371+K16197+K04348+K04515+K08694+K02602+K03353+K06636+K03354+K06269+K13055+K04371+K11580+K04373+K04515+K08042+K05087+K05087+K11584+K04526+K06635+K04515+K04960+K04348+K04959+K08041+K04345+K06669+K02365+K08836+K04373+K08557+K11584+K02602+K11481+K02183+K03456+K04382+K04382+K03094+K02183+K02602+K08049+K03362+K05868+K03363+K08047+K06269+K08694+K12456+K06636+K03351+…
p53 signaling pathway	ko04115	80	Manis_javanica_newGene_11333;Manis_javanica_newGene_13679;Manis_javanica_newGene_4042;Manis_javanica_newGene_4536;Manis_javanica_newGene_781;Manis_javanica_newGene_8393;gene10259;gene10555;gene10587;gene11689;gene11728;gene11861;gene11909;gene12053;gene12425;gene12528;gene12530;gene12735;gene14364;gene14772;gene15199;gene15459;gene15835;gene16012;gene16423;gene17701;gene17721;gene17846;gene17900;…	K04398+K04399+K10141+K04390+K06621+K10137+K10144+K10132+K04398+K10136+K16857+K02159+K10128+K04596+K10141+K10134+K02216+K10145+K10146+K10138+K10151+K04451+K10147+K04402+K10152+K10129+K02084+K05868+K10143+K10137+K04506+K04399+K06641+K05459+K10130+K10127+K05868+K07207+K02089+K04728+K10142+K10144+K04399+K10139+K06626+K04726+K06625+K10148+K05868+K10141+K02087+K10141+K04503+K10140+K10808+K10148+K02187+…
Ubiquitin mediated proteolysis	ko04120	160	Manis_javanica_newGene_13805;Manis_javanica_newGene_2063;Manis_javanica_newGene_6522;Manis_javanica_newGene_7150;Manis_javanica_newGene_756;Manis_javanica_newGene_7829;Manis_javanica_newGene_8150;Manis_javanica_newGene_8444;Manis_javanica_newGene_9649;gene10109;gene10164;gene10233;gene10259;gene10371;gene10411;gene10525;gene10556;gene10821;gene1084;gene10855;gene11159;gene11488;gene11554;gene1191…	K10582+K10589+K10260+K10612+K10582+K03869+K04552+K10593+K03869+K10607+K04649+K10608+K10144+K10581+K10609+K03178+K10684+K16061+K10600+K10570+K03869+K10588+K03353+K10578+K16064+K10589+K03354+K10592+K10597+K10688+K03872+K10291+K16063+K08285+K04555+K10591+K06689+K10571+K10595+K10698+K05630+K13305+K04678+K03870+K10603+K07868+K10260+K04707+K10699+K10609+K10685+K04694+K10614+K03094+K10612+K05633+K04706+…
Sulfur relay system	ko04122	9	gene17700;gene18688;gene22337;gene23172;gene23807;gene449;gene4895;gene4896;gene8662;	K00566+K11996+K12161+K14169+K03635+K04487+K01011+K01011+K03639
SNARE interactions in vesicular transport	ko04130	37	Manis_javanica_newGene_130;Manis_javanica_newGene_1717;Manis_javanica_newGene_1897;Manis_javanica_newGene_8655;gene10133;gene10288;gene11038;gene11121;gene11275;gene11339;gene11739;gene12638;gene13790;gene15170;gene16932;gene17559;gene18992;gene19004;gene19745;gene20406;gene2124;gene2125;gene21763;gene21808;gene22471;gene22702;gene23729;gene2381;gene25005;gene25679;gene3203;gene5787;gene6134;gene…	K08515+K08501+K08501+K08493+K08504+K08488+K08513+K08491+K08498+K08486+K08508+K08493+K08487+K08487+K08514+K08495+K08489+K08493+K08509+K13504+K08486+K13502+K08492+K08507+K08504+K08501+K08486+K08496+K08510+K08515+K08517+K08490+K08516+K08498+K13505+K08497+K04560
Regulation of autophagy	ko04140	37	Manis_javanica_newGene_3159;Manis_javanica_newGene_6721;Manis_javanica_newGene_7174;gene11032;gene11391;gene12698;gene13470;gene13967;gene14580;gene15385;gene15534;gene15535;gene16431;gene17649;gene19055;gene21305;gene21718;gene22243;gene22590;gene23605;gene24841;gene25432;gene25615;gene25927;gene26134;gene2971;gene3619;gene498;gene5880;gene6313;gene7048;gene7190;gene7816;gene8768;gene902;gene921…	K08339+K17888+K08342+K08269+K08342+K08341+K08333+K04526+K08331+K08336+K17890+K17890+K08269+K08333+K07198+K08342+K04687+K08342+K07198+K08334+K08341+K08341+K05414+K08269+K08269+K17890+K08269+K08343+K17888+K17889+K08334+K08342+K08342+K00914+K08337+K05414+K05414
Protein processing in endoplasmic reticulum	ko04141	191	Manis_javanica_newGene_10449;Manis_javanica_newGene_11349;Manis_javanica_newGene_11418;Manis_javanica_newGene_12748;Manis_javanica_newGene_13750;Manis_javanica_newGene_14064;Manis_javanica_newGene_268;Manis_javanica_newGene_884;gene10025;gene10040;gene10048;gene10342;gene10458;gene10469;gene10672;gene10884;gene11282;gene11283;gene11353;gene11857;gene11861;gene11919;gene12120;gene12154;gene12213;g…	K04523+K14007+K04523+K09540+K09540+K01456+K14010+K09523+K10080+K09521+K09490+K12670+K14007+K01230+K08288+K01367+K10839+K08057+K13249+K14019+K02159+K10578+K07342+K05638+K14007+K10597+K01230+K03853+K07151+K04426+K03237+K08054+K09503+K04555+K12667+K14008+K16196+K08852+K09540+K06689+K01228+K04571+K14009+K09054+K14021+K16194+K08056+K09502+K14012+K13525+K01230+K14026+K14027+K13250+K04523+K14001+K04440+…
Lysosome	ko04142	143	Manis_javanica_newGene_13242;Manis_javanica_newGene_13353;Manis_javanica_newGene_2436;Manis_javanica_newGene_3724;Manis_javanica_newGene_6975;Manis_javanica_newGene_7609;gene10147;gene10224;gene10274;gene10396;gene10412;gene10466;gene10866;gene1089;gene1101;gene11288;gene11311;gene11429;gene11720;gene11770;gene1199;gene12022;gene12171;gene12327;gene12348;gene12793;gene12901;gene13380;gene13582;ge…	K12393+K12316+K12399+K12373+K10532+K01365+K01135+K04646+K01365+K12390+K06528+K12398+K12301+K08239+K06562+K01158+K04992+K02155+K02144+K01366+K12347+K12388+K12404+K03662+K01186+K01373+K12385+K12387+K04645+K04644+K01363+K12392+K06129+K12387+K12397+K12387+K02146+K12307+K01368+K12399+K01365+K06501+K06528+K03661+K01365+K01365+K01365+K12309+K01136+K02154+K08568+K12382+K05656+K01125+K12309+K05642+K04646+…
Endocytosis	ko04144	240	Manis_javanica_newGene_10280;Manis_javanica_newGene_1039;Manis_javanica_newGene_1119;Manis_javanica_newGene_11907;Manis_javanica_newGene_14009;Manis_javanica_newGene_1575;Manis_javanica_newGene_4753;Manis_javanica_newGene_4797;Manis_javanica_newGene_4877;Manis_javanica_newGene_4899;Manis_javanica_newGene_5086;Manis_javanica_newGene_6757;Manis_javanica_newGene_8363;Manis_javanica_newGene_866;Manis…	K12491+K12472+K08291+K07905+K12183+K06093+K12479+K04705+K12488+K11824+K11839+K18443+K04705+K07940+K11839+K18440+K12197+K05095+K11247+K04646+K12494+K07937+K12495+K12489+K12494+K05099+K06278+K12958+K06751+K12470+K04677+K00909+K11824+K04180+K04500+K05098+K12488+K04142+K05085+K11825+K12194+K04189+K12194+K05704+K11247+K10591+K12959+K05087+K05087+K04645+K12193+K04644+K12471+K12494+K12192+K13305+K04678+…
Phagosome	ko04145	170	Manis_javanica_newGene_10431;Manis_javanica_newGene_10432;Manis_javanica_newGene_1070;Manis_javanica_newGene_2860;Manis_javanica_newGene_3087;Manis_javanica_newGene_3877;Manis_javanica_newGene_7505;Manis_javanica_newGene_7609;Manis_javanica_newGene_804;Manis_javanica_newGene_8784;Manis_javanica_newGene_9602;Manis_javanica_newGene_9888;gene1016;gene10274;gene10288;gene10412;gene10430;gene10589;gen…	K06856+K06856+K06856+K02153+K07374+K06856+K10066+K01365+K05692+K06856+K06558+K06856+K02148+K01365+K08488+K06528+K02153+K00921+K05692+K08057+K06751+K02155+K02144+K16857+K02150+K07342+K10160+K06461+K03662+K06558+K06752+K06493+K02149+K08054+K03990+K13240+K10068+K03991+K10067+K10414+K06563+K12478+K10062+K02146+K01368+K01365+K07897+K08008+K06528+K03661+K01365+K01365+K01365+K10415+K05653+K12478+K02154+…
Peroxisome	ko04146	96	Manis_javanica_newGene_10472;Manis_javanica_newGene_11693;Manis_javanica_newGene_1183;Manis_javanica_newGene_11976;Manis_javanica_newGene_13771;Manis_javanica_newGene_5074;Manis_javanica_newGene_8788;Manis_javanica_newGene_9916;gene10255;gene10299;gene10590;gene10935;gene11314;gene11380;gene11409;gene11490;gene11947;gene12102;gene12360;gene12517;gene12576;gene12594;gene12746;gene12751;gene12781;g…	K13239+K12405+K01578+K13239+K01578+K13345+K12405+K13239+K13356+K04565+K00031+K12405+K13353+K05677+K00830+K00869+K13352+K04564+K13354+K07513+K13341+K13350+K13335+K00272+K13355+K13337+K01796+K05675+K08746+K00232+K08764+K00106+K13299+K00232+K01640+K13356+K12663+K05940+K01897+K00624+K13273+K13344+K13336+K11187+K13345+K01897+K00306+K07514+K12405+K13347+K03426+K13237+K01897+K03781+K00232+K00477+K13279+…
mTOR signaling pathway	ko04150	69	gene10180;gene1095;gene11032;gene11076;gene11411;gene11427;gene11737;gene119;gene11920;gene11969;gene12193;gene1223;gene12294;gene12648;gene13006;gene13576;gene13967;gene14299;gene14410;gene1447;gene15375;gene16431;gene17532;gene17942;gene18057;gene19055;gene1928;gene19371;gene19885;gene19936;gene20185;gene20902;gene21117;gene21309;gene21456;gene22590;gene23224;gene23534;gene24682;gene24989;gene2…	K04371+K00922+K08269+K07298+K07209+K06276+K16186+K08271+K16186+K02991+K04371+K04373+K07204+K04688+K08267+K03259+K04526+K03258+K16185+K08268+K04373+K08269+K00922+K08266+K05448+K07198+K05459+K03259+K07205+K00922+K08272+K07207+K16184+K02649+K03259+K07198+K02677+K07206+K07208+K02677+K02677+K04365+K03259+K08269+K08269+K07206+K04688+K00922+K02649+K04456+K07203+K08269+K08270+K08272+K02649+K04688+K08272+…
PI3K-Akt signaling pathway	ko04151	391	Manis_javanica_newGene_10293;Manis_javanica_newGene_10431;Manis_javanica_newGene_10432;Manis_javanica_newGene_1070;Manis_javanica_newGene_12241;Manis_javanica_newGene_13562;Manis_javanica_newGene_13679;Manis_javanica_newGene_13732;Manis_javanica_newGene_1976;Manis_javanica_newGene_3414;Manis_javanica_newGene_3877;Manis_javanica_newGene_7420;Manis_javanica_newGene_7716;Manis_javanica_newGene_8784;…	K05130+K06856+K06856+K06856+K06485+K06244+K04399+K16332+K11584+K06585+K06856+K04538+K05870+K06856+K06856+K04465+K00693+K04548+K04546+K06236+K05095+K04371+K05405+K16197+K12230+K13303+K05431+K04377+K05079+K06585+K05121+K06240+K16859+K00922+K05099+K07298+K05462+K08524+K04347+K07209+K06276+K06241+K10167+K16857+K04358+K00693+K06586+K02991+K05637+K05080+K04364+K06525+K04371+K10160+K07204+K05098+K06480+…
AMPK signaling pathway	ko04152	150	Manis_javanica_newGene_11038;Manis_javanica_newGene_1183;Manis_javanica_newGene_11907;Manis_javanica_newGene_13771;Manis_javanica_newGene_1976;Manis_javanica_newGene_6038;Manis_javanica_newGene_7716;gene10089;gene10099;gene10802;gene1095;gene11076;gene11427;gene11484;gene11678;gene11864;gene119;gene11900;gene12294;gene12648;gene13291;gene13330;gene13342;gene1340;gene13967;gene14316;gene14509;gene…	K07877+K01578+K07905+K01578+K11584+K07200+K05870+K00693+K07881+K04427+K00922+K07298+K06276+K11262+K06627+K00693+K08271+K08765+K07204+K04688+K05087+K07200+K09048+K05087+K04526+K00850+K00850+K07187+K07199+K01103+K08765+K07359+K11262+K09048+K04527+K06627+K03841+K09047+K08292+K11584+K05870+K03456+K07200+K04354+K04382+K04382+K17446+K05062+K11583+K07191+K00922+K09048+K11411+K06259+K08765+K07292+K07199+…
Apoptosis	ko04210	92	Manis_javanica_newGene_11255;Manis_javanica_newGene_11333;Manis_javanica_newGene_13679;Manis_javanica_newGene_4536;gene10454;gene10587;gene10821;gene10884;gene1095;gene11385;gene11411;gene11861;gene12251;gene12337;gene12343;gene12518;gene12885;gene12889;gene13019;gene13885;gene1441;gene14783;gene15459;gene15852;gene15890;gene16611;gene16779;gene17532;gene17721;gene17785;gene18401;gene18470;gene18…	K04733+K04398+K04399+K04390+K04348+K04398+K16061+K01367+K00922+K04727+K07209+K02159+K02310+K07210+K03853+K04729+K04389+K02373+K02311+K04734+K04348+K04345+K04451+K04386+K04400+K04739+K04732+K00922+K02084+K03173+K04399+K02158+K04731+K04345+K04345+K00922+K04739+K04730+K04397+K04467+K03176+K04721+K02649+K04723+K04728+K04739+K04739+K04399+K02161+K04737+K04726+K04741+K02582+K16060+K16060+K06268+K04466+…
Cardiac muscle contraction	ko04260	92	Manis_javanica_newGene_13321;Manis_javanica_newGene_241;Manis_javanica_newGene_5659;Manis_javanica_newGene_8282;gene1012;gene10168;gene11593;gene11594;gene11595;gene12090;gene12560;gene1286;gene12969;gene13039;gene1311;gene1312;gene13378;gene13725;gene14202;gene14203;gene14204;gene14440;gene14899;gene14950;gene15412;gene15460;gene15598;gene159;gene16043;gene16510;gene17386;gene18694;gene19474;gen…	K17751+K00415+K00415+K00414+K01540+K10373+K17751+K17751+K17751+K10351+K02265+K01538+K02267+K04962+K01539+K01539+K04962+K04851+K04859+K04859+K04859+K17751+K02266+K00413+K04853+K01540+K05865+K10374+K01540+K12045+K04865+K00419+K04962+K04864+K04858+K00414+K04962+K02272+K05742+K02263+K04862+K02268+K02268+K02271+K04867+K10375+K04962+K00415+K02273+K04851+K17751+K04850+K02263+K04860+K00411+K02267+K04860+…
Adrenergic signaling in cardiomyocytes	ko04261	184	Manis_javanica_newGene_10444;Manis_javanica_newGene_10662;Manis_javanica_newGene_12671;Manis_javanica_newGene_13321;Manis_javanica_newGene_1976;Manis_javanica_newGene_4332;Manis_javanica_newGene_7716;gene1012;gene10155;gene10168;gene10180;gene10463;gene10635;gene10906;gene1095;gene11593;gene11594;gene11595;gene12088;gene12090;gene12193;gene12390;gene12393;gene12482;gene12545;gene1286;gene13039;ge…	K02183+K05850+K02183+K17751+K11584+K11584+K05870+K01540+K05850+K10373+K04371+K04515+K04845+K04137+K00922+K17751+K17751+K17751+K06269+K10351+K04371+K04515+K04142+K04630+K04445+K01538+K04962+K05858+K01539+K01539+K08042+K09048+K04962+K04851+K11584+K04515+K04630+K04859+K04859+K04859+K17751+K08041+K04345+K04136+K04853+K01540+K05865+K09048+K10374+K01540+K09047+K11584+K12045+K02183+K05870+K03456+K04354+…
Vascular smooth muscle contraction	ko04270	135	Manis_javanica_newGene_10444;Manis_javanica_newGene_12671;Manis_javanica_newGene_5537;Manis_javanica_newGene_5678;Manis_javanica_newGene_6639;gene10180;gene10269;gene10315;gene10350;gene10351;gene10352;gene10353;gene10566;gene10906;gene11905;gene12088;gene12193;gene1270;gene12890;gene13079;gene13248;gene13390;gene13477;gene13502;gene13556;gene13563;gene13725;gene14255;gene1448;gene14578;gene14774…	K02183+K02183+K04346+K05274+K05274+K04371+K08845+K01047+K01047+K01047+K01047+K01047+K04266+K04137+K12313+K06269+K04371+K16342+K12319+K05858+K08042+K04514+K04936+K00907+K04226+K04941+K04851+K04960+K18051+K04959+K08041+K04345+K04635+K04136+K04267+K12324+K04853+K17687+K04936+K12329+K02183+K01047+K04263+K02183+K04632+K18050+K08049+K06270+K04939+K06068+K08447+K04938+K12318+K08047+K06269+K00907+K05858+…
Wnt signaling pathway	ko04310	150	Manis_javanica_newGene_1084;Manis_javanica_newGene_13893;Manis_javanica_newGene_6619;Manis_javanica_newGene_6878;gene10249;gene10264;gene1030;gene10454;gene10463;gene1047;gene10511;gene10512;gene1062;gene10632;gene10802;gene10969;gene10999;gene11336;gene11413;gene11583;gene11993;gene12064;gene12378;gene12390;gene1253;gene12696;gene1303;gene13079;gene13242;gene13958;gene14155;gene1441;gene14466;ge…	K02176+K17332+K04491+K04512+K03345+K08957+K02222+K04348+K04515+K03069+K01064+K00312+K04377+K00182+K04427+K10162+K08960+K02842+K02165+K17332+K03097+K04494+K04511+K04515+K04504+K02353+K04510+K05858+K02185+K17333+K04515+K04348+K00444+K03068+K04345+K02235+K10151+K03344+K00572+K04451+K04512+K00181+K02085+K04511+K01558+K10152+K04440+K04492+K01384+K04490+K02329+K03094+K02620+K03097+K00572+K03362+K02085+…
Dorso-ventral axis formation	ko04320	33	gene10064;gene10180;gene10886;gene11337;gene11549;gene12177;gene12193;gene16299;gene17302;gene17398;gene17665;gene1806;gene18299;gene19391;gene19537;gene19538;gene19765;gene2243;gene22604;gene23206;gene25036;gene26112;gene2623;gene3204;gene4212;gene4440;gene5327;gene5370;gene5812;gene5934;gene686;gene7785;gene9733;	K02098+K04371+K02602+K02156+K02098+K04364+K04371+K02602+K04361+K02602+K02098+K02678+K02098+K02602+K02599+K02599+K04364+K02678+K03211+K03099+K02599+K04364+K03211+K02599+K03099+K04368+K02602+K02156+K02156+K02599+K02184+K07827+K04361
Notch signaling pathway	ko04330	54	Manis_javanica_newGene_10963;gene10360;gene10443;gene11361;gene12126;gene12661;gene12696;gene12963;gene1305;gene13668;gene16789;gene16905;gene1693;gene17508;gene17580;gene17849;gene1813;gene18229;gene18309;gene18560;gene19353;gene19537;gene19538;gene20538;gene20644;gene21508;gene21538;gene22105;gene22193;gene22489;gene22541;gene2418;gene24365;gene25036;gene25671;gene25940;gene26281;gene3204;gene3…	K06067+K06059+K05948+K06054+K06172+K06061+K02353+K06170+K06171+K06052+K06052+K06061+K06058+K06066+K06059+K06053+K02353+K04505+K06067+K06067+K06061+K02599+K02599+K06062+K06058+K06058+K06065+K06058+K06057+K04498+K06053+K04496+K06058+K02599+K06062+K06058+K06059+K02599+K06063+K06051+K05948+K02599+K04498+K06051+K06056+K05948+K02353+K04498+K04505+K06057+K04496+K06051+K04522+K06172
Hedgehog signaling pathway	ko04340	53	gene10264;gene10511;gene10512;gene10632;gene10999;gene11996;gene13840;gene14466;gene14783;gene15108;gene15135;gene15382;gene1637;gene1653;gene16825;gene17498;gene17707;gene1777;gene18523;gene18558;gene18980;gene19050;gene19167;gene1943;gene1948;gene1949;gene20287;gene20561;gene20652;gene20962;gene21180;gene21690;gene22134;gene2382;gene2383;gene2387;gene24596;gene2470;gene2959;gene2963;gene2964;ge…	K08957+K01064+K00312+K00182+K08960+K08958+K08958+K00444+K04345+K04662+K06231+K00572+K01558+K11988+K01384+K06235+K00572+K03362+K06233+K04662+K06230+K04345+K04345+K11990+K01357+K03209+K00714+K06226+K16797+K00714+K06225+K03362+K08959+K01064+K00312+K03083+K16798+K11101+K06228+K00445+K01357+K00408+K06233+K06232+K08958+K11989+K06233+K00182+K08957+K06229+K00444+K06233+K06234
TGF-beta signaling pathway	ko04350	84	Manis_javanica_newGene_4644;Manis_javanica_newGene_7031;gene10011;gene10180;gene1062;gene10812;gene10969;gene11497;gene11563;gene1169;gene11728;gene12193;gene12258;gene12648;gene12683;gene13281;gene13390;gene13945;gene14438;gene14450;gene15108;gene15761;gene15916;gene16639;gene16690;gene16752;gene17007;gene17015;gene17103;gene17104;gene18558;gene18815;gene18979;gene1909;gene19103;gene1973;gene199…	K04681+K04671+K13567+K04371+K04377+K13578+K10162+K04677+K04683+K04664+K16857+K04371+K04500+K04688+K16622+K04682+K04514+K04668+K04678+K13376+K04662+K13377+K04500+K04679+K04667+K03456+K04681+K04382+K04382+K03094+K04662+K04686+K04667+K16790+K04679+K13375+K04673+K04666+K03456+K04671+K04667+K04513+K04687+K04671+K04685+K17693+K04663+K04498+K04676+K04664+K03347+K04684+K17694+K13596+K16621+K16622+K04677+…
Axon guidance	ko04360	148	Manis_javanica_newGene_13893;Manis_javanica_newGene_4227;gene10180;gene10454;gene1049;gene10813;gene10981;gene11082;gene11315;gene11475;gene11583;gene11738;gene12193;gene12280;gene12317;gene12330;gene12447;gene12482;gene12715;gene12816;gene13390;gene13450;gene13574;gene13717;gene13775;gene13781;gene1382;gene13958;gene14003;gene14184;gene14187;gene14189;gene1441;gene14479;gene14775;gene1485;gene14…	K17332+K06619+K04371+K04348+K06838+K07521+K05099+K05462+K07522+K06820+K17332+K05107+K04371+K05114+K05110+K06820+K16351+K04630+K04189+K06840+K04514+K05765+K07521+K06842+K06550+K06821+K06845+K17333+K06821+K06840+K04630+K06840+K04348+K05104+K06754+K06521+K06842+K05463+K05107+K05105+K05463+K05102+K06840+K07526+K10031+K07520+K06820+K06765+K06521+K05462+K05110+K06844+K04410+K05106+K05462+K05462+K05462+…
VEGF signaling pathway	ko04370	68	Manis_javanica_newGene_13679;Manis_javanica_newGene_13893;gene10180;gene10370;gene10454;gene1095;gene11583;gene12015;gene12193;gene12296;gene1270;gene13026;gene14334;gene1441;gene15861;gene17232;gene17532;gene18057;gene18170;gene18401;gene18470;gene18485;gene19424;gene19936;gene20840;gene21082;gene21309;gene22654;gene22655;gene22984;gene22988;gene22990;gene23224;gene24137;gene24989;gene25142;gene…	K04399+K17332+K04371+K04718+K04348+K00922+K17332+K05859+K04371+K05098+K16342+K05704+K04443+K04348+K04444+K11987+K00922+K05448+K01116+K04399+K02158+K04392+K02833+K00922+K16342+K08273+K02649+K04369+K04399+K16342+K16342+K16342+K02677+K06268+K02677+K02677+K00922+K02649+K04456+K05725+K04348+K04393+K17447+K17447+K17332+K13242+K04368+K02649+K07860+K04718+K04348+K04455+K05725+K06268+K04456+K04366+K05725+…
Osteoclast differentiation	ko04380	148	Manis_javanica_newGene_10293;Manis_javanica_newGene_10798;Manis_javanica_newGene_13893;Manis_javanica_newGene_13926;Manis_javanica_newGene_1740;Manis_javanica_newGene_5895;Manis_javanica_newGene_7716;gene10180;gene10454;gene10666;gene10802;gene1095;gene11293;gene11411;gene11436;gene11583;gene11666;gene11810;gene12015;gene12177;gene12193;gene12337;gene12475;gene12553;gene12664;gene12952;gene13608;…	K05130+K06512+K17332+K06551+K06551+K09253+K05870+K04371+K04348+K14379+K04427+K00922+K09028+K07209+K06512+K17332+K11220+K04576+K05859+K04364+K04371+K07210+K05453+K06493+K14381+K07992+K11221+K04734+K05415+K04379+K14380+K09455+K04348+K13376+K06512+K14377+K09253+K08008+K06551+K06551+K04386+K07371+K04433+K05870+K04694+K04469+K11217+K04449+K00922+K03173+K05473+K05856+K04392+K04696+K01371+K08601+K13375+…
Hippo signaling pathway	ko04390	174	Manis_javanica_newGene_11002;Manis_javanica_newGene_1575;Manis_javanica_newGene_3347;Manis_javanica_newGene_5672;Manis_javanica_newGene_6619;Manis_javanica_newGene_7031;Manis_javanica_newGene_8965;gene10291;gene10361;gene10511;gene10512;gene10555;gene1062;gene10632;gene10812;gene10999;gene11070;gene11336;gene11365;gene11513;gene1159;gene11615;gene1169;gene11697;gene11878;gene12088;gene12181;gene1…	K16823+K06093+K16820+K04412+K04491+K04671+K04412+K06827+K16197+K01064+K00312+K10132+K04377+K00182+K13578+K08960+K05692+K02842+K09448+K08791+K06094+K16682+K04664+K16144+K09448+K06269+K06094+K04500+K06092+K16823+K09448+K16686+K06091+K16622+K11828+K02353+K05691+K04412+K16682+K06685+K12075+K09850+K16821+K13376+K00444+K12075+K02235+K16822+K04662+K10151+K00572+K13377+K16682+K02085+K04500+K05689+K05691+…
Focal adhesion	ko04510	262	Manis_javanica_newGene_12241;Manis_javanica_newGene_13562;Manis_javanica_newGene_3414;Manis_javanica_newGene_5817;Manis_javanica_newGene_5818;Manis_javanica_newGene_804;gene10134;gene10180;gene10465;gene1069;gene10840;gene10898;gene1095;gene10981;gene10982;gene10983;gene11070;gene11143;gene11171;gene11317;gene11427;gene11445;gene11728;gene11948;gene12003;gene12088;gene12090;gene12177;gene12187;ge…	K06485+K06244+K06585+K04349+K04349+K05692+K06236+K04371+K05700+K06585+K06240+K16859+K00922+K05099+K06278+K12958+K05692+K05699+K05740+K05730+K06276+K06241+K16857+K06586+K05637+K06269+K10351+K04364+K06525+K04371+K05098+K06480+K03853+K06252+K06493+K06238+K06587+K06253+K06250+K06237+K05699+K05704+K06240+K12959+K05730+K04375+K05087+K04514+K05087+K00907+K17449+K06238+K06236+K03900+K06275+K06275+K10151+…
ECM-receptor interaction	ko04512	116	Manis_javanica_newGene_12241;Manis_javanica_newGene_13562;Manis_javanica_newGene_3414;gene10134;gene1069;gene10840;gene11358;gene11445;gene11728;gene11948;gene12003;gene12187;gene12302;gene12505;gene12553;gene12639;gene12670;gene12731;gene12733;gene12737;gene12773;gene12836;gene13107;gene13794;gene14310;gene1439;gene15020;gene1524;gene15374;gene15709;gene15738;gene15739;gene1588;gene15957;gene166…	K06485+K06244+K06585+K06236+K06585+K06240+K06260+K06241+K16857+K06586+K05637+K06525+K06480+K06252+K06493+K06238+K06587+K06253+K06250+K06267+K06237+K06258+K06240+K06238+K06236+K03900+K06257+K06590+K06258+K06266+K06245+K05636+K06525+K06249+K06485+K06254+K04659+K06237+K05637+K06238+K04659+K06238+K05717+K04659+K06249+K06259+K06247+K06588+K06256+K06484+K06483+K06238+K06238+K06244+K06476+K06246+K05635+…
Cell adhesion molecules (CAMs)	ko04514	159	Manis_javanica_newGene_12241;Manis_javanica_newGene_12620;Manis_javanica_newGene_2855;Manis_javanica_newGene_3414;Manis_javanica_newGene_696;Manis_javanica_newGene_883;gene10076;gene10502;gene10647;gene10648;gene1069;gene10762;gene10911;gene10928;gene10964;gene11315;gene11346;gene11685;gene12052;gene12222;gene1231;gene12447;gene12499;gene12547;gene12921;gene12939;gene130;gene13144;gene13775;gene1…	K06485+K06478+K06766+K06585+K06592+K06087+K06809+K06491+K06771+K06467+K06585+K06760+K05693+K05718+K06087+K07522+K06751+K06746+K07377+K06461+K06747+K16351+K06752+K06785+K07380+K16337+K06523+K05695+K06550+K06520+K06087+K06710+K07378+K06454+K06257+K06531+K06590+K06477+K06459+K06458+K05689+K06816+K06485+K05413+K07378+K06756+K07378+K06087+K06793+K06087+K06089+K06757+K06759+K06797+K06087+K06592+K06770+…
Adherens junction	ko04520	85	Manis_javanica_newGene_6619;Manis_javanica_newGene_696;Manis_javanica_newGene_804;gene10180;gene10465;gene10802;gene10911;gene10981;gene11070;gene11143;gene1116;gene11323;gene11397;gene11993;gene12193;gene12258;gene12754;gene12792;gene12835;gene13026;gene13144;gene13291;gene1340;gene13679;gene1385;gene14360;gene14744;gene15080;gene15149;gene15799;gene15916;gene16058;gene1614;gene16223;gene16656;g…	K04491+K06592+K05692+K04371+K05700+K04427+K05693+K05099+K05692+K05699+K05694+K05701+K06082+K03097+K04371+K04500+K05753+K05699+K05691+K05704+K05695+K05087+K05087+K05690+K06085+K04362+K05698+K16848+K06531+K04527+K04500+K05689+K05748+K05691+K04492+K04490+K02620+K03097+K04361+K05699+K04392+K04491+K06592+K05747+K06592+K05692+K04513+K06593+K05747+K05702+K05697+K04498+K02105+K06084+K05691+K06592+K06086+…
Tight junction	ko04530	172	Manis_javanica_newGene_12273;Manis_javanica_newGene_13321;Manis_javanica_newGene_13446;Manis_javanica_newGene_1575;Manis_javanica_newGene_3356;Manis_javanica_newGene_4502;Manis_javanica_newGene_804;Manis_javanica_newGene_8367;Manis_javanica_newGene_883;gene10078;gene10728;gene10809;gene10964;gene11070;gene11143;gene11323;gene1159;gene11593;gene11594;gene11595;gene11895;gene11993;gene12090;gene121…	K10352+K17751+K10352+K06093+K06111+K06786+K05692+K06096+K06087+K06786+K06107+K06107+K06087+K05692+K05699+K05701+K06094+K17751+K17751+K17751+K07829+K03097+K10351+K06094+K06092+K10352+K04630+K06785+K06091+K05699+K05691+K10352+K10352+K10352+K10352+K18625+K05704+K18625+K06087+K04630+K06107+K17751+K18051+K10352+K12758+K12756+K06105+K05691+K03456+K06106+K04354+K04382+K04382+K03097+K06090+K10352+K18050+…
Gap junction	ko04540	95	Manis_javanica_newGene_3087;gene10180;gene11323;gene11652;gene12177;gene12193;gene12400;gene12482;gene12511;gene12890;gene13026;gene13079;gene13248;gene14187;gene14255;gene14578;gene14774;gene14783;gene14852;gene17193;gene17198;gene17209;gene17302;gene17453;gene18101;gene18156;gene18213;gene18469;gene18915;gene19050;gene19167;gene19295;gene19297;gene19393;gene19424;gene1956;gene19765;gene19811;ge…	K07374+K04371+K05701+K04157+K04364+K04371+K04420+K04630+K04603+K12319+K05704+K05858+K08042+K04630+K04960+K04959+K08041+K04345+K04635+K07375+K04632+K07375+K04361+K08049+K12318+K07374+K08047+K05858+K04357+K04345+K04345+K12318+K12319+K04289+K02833+K08046+K04364+K04145+K07375+K04464+K04157+K04463+K04141+K08042+K04632+K08044+K07374+K07372+K07376+K08959+K08049+K04369+K05089+K03099+K02677+K04363+K04604+…
Signaling pathways regulating pluripotency of stem cells	ko04550	146	Manis_javanica_newGene_7031;Manis_javanica_newGene_9294;gene1000;gene10011;gene10161;gene10180;gene10490;gene10491;gene10511;gene10512;gene1062;gene10632;gene10812;gene1095;gene11336;gene12177;gene12193;gene12258;gene12614;gene12696;gene12861;gene12879;gene13291;gene1340;gene13544;gene13648;gene13769;gene14360;gene14466;gene14501;gene14883;gene14916;gene15108;gene15339;gene15382;gene15752;gene158…	K04671+K05058+K08031+K13567+K05095+K04371+K09378+K09378+K01064+K00312+K04377+K00182+K13578+K00922+K02842+K04364+K04371+K04500+K14439+K02353+K11488+K08036+K05087+K05087+K11305+K11487+K09326+K04362+K00444+K17846+K11489+K02235+K04662+K05058+K00572+K18484+K02085+K04500+K01558+K10177+K04667+K01384+K11217+K02329+K11478+K00922+K00572+K09071+K02085+K15613+K02353+K11421+K04662+K18489+K02157+K04667+K16790+…
Complement and coagulation cascades	ko04610	82	Manis_javanica_newGene_11250;Manis_javanica_newGene_9656;gene10398;gene10406;gene10407;gene10464;gene10552;gene11219;gene11379;gene1178;gene12399;gene13195;gene13298;gene13508;gene13686;gene13754;gene13755;gene13791;gene1439;gene14416;gene14569;gene14583;gene15091;gene15093;gene1530;gene15332;gene15333;gene1591;gene1592;gene1593;gene1701;gene17373;gene17604;gene17787;gene17856;gene18223;gene19095…	K04004+K03997+K03916+K01320+K01314+K01348+K04010+K04004+K03901+K03992+K01344+K03990+K03993+K03991+K04001+K03997+K03998+K03908+K03900+K01315+K04000+K01313+K03996+K03995+K03911+K04012+K04006+K03904+K03903+K03905+K01300+K01328+K03906+K03999+K01343+K03987+K04006+K03985+K03912+K03902+K03914+K04007+K01330+K01331+K03910+K03910+K03898+K03991+K04008+K03991+K03917+K01321+K04003+K04002+K04002+K03909+K01343+…
Platelet activation	ko04611	143	Manis_javanica_newGene_2248;gene10134;gene10180;gene1095;gene11070;gene1110;gene11358;gene11739;gene12015;gene12088;gene12109;gene12193;gene12482;gene12553;gene1270;gene12890;gene13026;gene13079;gene13142;gene13248;gene13390;gene13502;gene14187;gene14255;gene14310;gene1439;gene14578;gene14774;gene14783;gene1505;gene15363;gene158;gene1591;gene1592;gene1593;gene16293;gene17147;gene17158;gene17198;g…	K05854+K06236+K04371+K00922+K05692+K16059+K06260+K08508+K05859+K06269+K16059+K04371+K04630+K06493+K16342+K12319+K05704+K05858+K17704+K08042+K04514+K00907+K04630+K04960+K06236+K03900+K04959+K08041+K04345+K00509+K05215+K06271+K03904+K03903+K03905+K01832+K05732+K04263+K04632+K08049+K06270+K00922+K12318+K12757+K12757+K08047+K06269+K07836+K00907+K17084+K05858+K04345+K07983+K04345+K12318+K12319+K06271+…
Antigen processing and presentation	ko04612	69	Manis_javanica_newGene_7609;Manis_javanica_newGene_7716;gene10048;gene10274;gene11283;gene11346;gene12499;gene12660;gene1354;gene13735;gene14807;gene15130;gene15242;gene15389;gene15732;gene15735;gene15958;gene15960;gene15963;gene16427;gene16615;gene16622;gene17162;gene17317;gene18069;gene1826;gene18918;gene19647;gene2046;gene20996;gene20997;gene21163;gene21186;gene21251;gene21308;gene21718;gene21…	K01365+K05870+K09490+K01365+K08057+K06751+K06752+K08054+K08066+K01363+K06454+K08056+K01368+K01365+K06459+K06458+K01365+K01365+K01365+K05653+K05870+K08060+K06505+K08061+K04079+K01369+K09489+K05654+K01365+K06752+K06752+K06541+K09489+K08055+K08059+K04687+K07980+K06752+K06752+K06752+K08062+K09489+K06698+K03283+K03283+K06516+K05654+K05653+K06751+K06751+K03283+K06751+K08063+K06696+K06697+K06751+K06751+…
Renin-angiotensin system	ko04614	21	gene10016;gene112;gene113;gene13134;gene17081;gene19722;gene20090;gene20145;gene2355;gene2357;gene23950;gene24206;gene334;gene3959;gene3988;gene4315;gene4859;gene4860;gene4861;gene5116;gene5435;	K01393+K01283+K01283+K11141+K01393+K11141+K04303+K01389+K04166+K08780+K09821+K04167+K09708+K01380+K11140+K01257+K01319+K01329+K01329+K13289+K01392
Toll-like receptor signaling pathway	ko04620	100	Manis_javanica_newGene_10293;Manis_javanica_newGene_11255;Manis_javanica_newGene_11333;gene10180;gene10334;gene10428;gene10587;gene10802;gene1095;gene11411;gene11666;gene11897;gene12193;gene12208;gene12337;gene12370;gene12518;gene12733;gene12889;gene12915;gene12916;gene13885;gene13891;gene13893;gene14625;gene15609;gene1602;gene16239;gene16445;gene1685;gene17437;gene17532;gene17567;gene180;gene182…	K05130+K04733+K04398+K04371+K05405+K10030+K04398+K04427+K00922+K07209+K11220+K05411+K04371+K10160+K07210+K05400+K04729+K06250+K02373+K12671+K05416+K04734+K05415+K04379+K09446+K10161+K05402+K04433+K04440+K05413+K10030+K00922+K03174+K12672+K05406+K12499+K04392+K05409+K01371+K09447+K05425+K00922+K05131+K04730+K04467+K04431+K02649+K05408+K05408+K12964+K04440+K04369+K04440+K04448+K05414+K05398+K07211+…
NOD-like receptor signaling pathway	ko04621	53	Manis_javanica_newGene_11333;gene10180;gene10334;gene10428;gene10587;gene10802;gene10931;gene11104;gene11411;gene12193;gene12219;gene12221;gene12337;gene12982;gene13885;gene14047;gene16445;gene16546;gene17140;gene17437;gene18069;gene18412;gene19058;gene19375;gene19504;gene20097;gene20282;gene21134;gene22510;gene23193;gene2390;gene2391;gene25043;gene26985;gene2725;gene2775;gene4034;gene410;gene523…	K04398+K04371+K05405+K10030+K04398+K04427+K11859+K12796+K07209+K04371+K12799+K12802+K07210+K05482+K04734+K12804+K04440+K12800+K12793+K10030+K04079+K12499+K12797+K10165+K08727+K12792+K04467+K12800+K04440+K04440+K16060+K16060+K12794+K14624+K12798+K03175+K02580+K04079+K04519+K12795+K04441+K04441+K09487+K08846+K02581+K04441+K04441+K04404+K04440+K04735+K12803+K04403+K03156
RIG-I-like receptor signaling pathway	ko04622	67	Manis_javanica_newGene_11333;Manis_javanica_newGene_3159;gene10428;gene10587;gene10772;gene10802;gene10852;gene1138;gene11411;gene11897;gene12337;gene12889;gene12915;gene13885;gene13891;gene15254;gene15385;gene15890;gene16049;gene16212;gene16445;gene16743;gene17437;gene17567;gene17785;gene1829;gene1834;gene19344;gene19345;gene19374;gene19429;gene19929;gene20282;gene21726;gene22510;gene23045;gene2…	K04398+K08339+K10030+K04398+K05441+K04427+K12650+K12646+K07209+K05411+K07210+K02373+K12671+K04734+K05415+K12655+K08336+K04400+K10652+K12654+K04440+K12159+K10030+K03174+K03173+K05406+K12170+K05442+K05440+K08601+K09447+K05425+K04467+K04416+K04440+K09578+K04440+K11594+K05414+K12649+K07211+K03175+K03171+K12653+K02580+K11594+K00863+K02861+K12648+K10652+K02373+K04441+K04441+K02581+K04441+K04441+K12651+…
Cytosolic DNA-sensing pathway	ko04623	50	Manis_javanica_newGene_1191;gene10334;gene11258;gene1138;gene11411;gene1152;gene11537;gene11897;gene11942;gene11952;gene12219;gene12337;gene12915;gene12982;gene13435;gene13885;gene13891;gene14008;gene16212;gene16269;gene18050;gene18174;gene18412;gene19429;gene20282;gene20855;gene21319;gene21486;gene23769;gene24024;gene25615;gene26082;gene2686;gene3331;gene3736;gene4034;gene4925;gene5231;gene5369;…	K12965+K05405+K03022+K12646+K07209+K03016+K12967+K05411+K03024+K03023+K12799+K07210+K12671+K05482+K03019+K04734+K05415+K10790+K12654+K14721+K03027+K03020+K12499+K09447+K04467+K08847+K03021+K12964+K03024+K03025+K05414+K03013+K07211+K12965+K03018+K02580+K03014+K04519+K03026+K02861+K12968+K12648+K12966+K03016+K02581+K04735+K05414+K05414+K03021+K05410
Jak-STAT signaling pathway	ko04630	164	Manis_javanica_newGene_10293;Manis_javanica_newGene_10852;Manis_javanica_newGene_11062;Manis_javanica_newGene_12514;Manis_javanica_newGene_2743;Manis_javanica_newGene_4797;Manis_javanica_newGene_8363;Manis_javanica_newGene_9294;gene10334;gene10611;gene1062;gene10675;gene10772;gene1095;gene11421;gene11504;gene11664;gene11666;gene11950;gene12011;gene12035;gene12177;gene12309;gene126;gene12722;gene1…	K05130+K05076+K04699+K05073+K05447+K04705+K04705+K05058+K05405+K05431+K04377+K05079+K05441+K00922+K05077+K04704+K11222+K11220+K16064+K04695+K05080+K04364+K05061+K05438+K16063+K05057+K05073+K05426+K11221+K05415+K04701+K05444+K05444+K05444+K05443+K04705+K05070+K04707+K10151+K05428+K05058+K04705+K05064+K05065+K05071+K05075+K10152+K04694+K07293+K05081+K05074+K11217+K05062+K00922+K05446+K05445+K04706+…
Hematopoietic cell lineage	ko04640	91	Manis_javanica_newGene_10431;Manis_javanica_newGene_10432;Manis_javanica_newGene_1070;Manis_javanica_newGene_12241;Manis_javanica_newGene_12514;Manis_javanica_newGene_3877;Manis_javanica_newGene_8538;Manis_javanica_newGene_8784;Manis_javanica_newGene_9888;gene10334;gene10611;gene10648;gene10675;gene11358;gene11470;gene11877;gene11886;gene12222;gene12302;gene12309;gene12475;gene12553;gene13434;gen…	K06856+K06856+K06856+K06485+K05073+K06856+K06469+K06856+K06856+K05405+K05431+K06467+K05079+K06260+K06448+K06475+K05454+K06461+K06480+K05061+K05453+K06493+K05073+K06468+K06460+K06466+K06454+K05428+K04012+K04006+K06459+K06458+K04387+K04386+K05071+K06485+K05072+K05092+K06259+K04006+K06256+K06484+K06483+K00977+K05073+K05437+K01389+K06498+K06476+K06451+K06450+K06452+K06503+K06457+K05068+K06482+K05423+…
Natural killer cell mediated cytotoxicity	ko04650	115	Manis_javanica_newGene_10293;Manis_javanica_newGene_10431;Manis_javanica_newGene_10432;Manis_javanica_newGene_1070;Manis_javanica_newGene_13215;Manis_javanica_newGene_13893;Manis_javanica_newGene_3877;Manis_javanica_newGene_4536;Manis_javanica_newGene_8784;Manis_javanica_newGene_9888;gene10180;gene10204;gene10269;gene10454;gene10928;gene1095;gene11317;gene11583;gene12015;gene12177;gene12193;gene1…	K05130+K06856+K06856+K06856+K06728+K17332+K06856+K04390+K06856+K06856+K04371+K07989+K08845+K04348+K05718+K00922+K05730+K17332+K05859+K04364+K04371+K04389+K07992+K07988+K06479+K06523+K05730+K17449+K05415+K04348+K17448+K07293+K00922+K06582+K01116+K06279+K05856+K04392+K07362+K07983+K02833+K06742+K04364+K06728+K00922+K05131+K05132+K07293+K06741+K04721+K02649+K04687+K04409+K05855+K05697+K04369+K04726+…
T cell receptor signaling pathway	ko04660	114	Manis_javanica_newGene_12620;Manis_javanica_newGene_13893;gene10180;gene10454;gene10802;gene1095;gene11317;gene11411;gene11427;gene11583;gene12177;gene12193;gene12337;gene13199;gene13885;gene13893;gene1392;gene13958;gene14139;gene14333;gene14387;gene14403;gene1441;gene14807;gene15147;gene15258;gene15732;gene15735;gene17532;gene17976;gene18071;gene18170;gene18310;gene18531;gene1874;gene18853;gene1…	K06478+K17332+K04371+K04348+K04427+K00922+K05730+K07209+K06276+K17332+K04364+K04371+K07210+K05730+K04734+K04379+K07368+K17333+K07365+K05443+K07367+K07369+K04348+K06454+K04707+K05428+K06459+K06458+K00922+K04410+K05872+K01116+K05856+K07362+K12076+K12076+K06470+K06538+K06713+K02833+K04364+K00922+K04707+K04467+K04431+K05733+K03161+K06451+K06450+K06452+K04513+K02649+K05429+K02089+K04687+K06478+K04409+…
B cell receptor signaling pathway	ko04662	85	Manis_javanica_newGene_10431;Manis_javanica_newGene_10432;Manis_javanica_newGene_1070;Manis_javanica_newGene_13893;Manis_javanica_newGene_2248;Manis_javanica_newGene_3877;Manis_javanica_newGene_8784;Manis_javanica_newGene_9888;gene10180;gene10454;gene1052;gene10648;gene1095;gene11317;gene11411;gene11583;gene12015;gene12177;gene12193;gene12337;gene127;gene13199;gene13885;gene13893;gene1392;gene139…	K06856+K06856+K06856+K17332+K05854+K06856+K06856+K06856+K04371+K04348+K12230+K06467+K00922+K05730+K07209+K17332+K05859+K04364+K04371+K07210+K06507+K05730+K04734+K04379+K07368+K17333+K07367+K07369+K04348+K04012+K03084+K07371+K15909+K06504+K00922+K05872+K04392+K02833+K04364+K00922+K04467+K03084+K02649+K05855+K05697+K04369+K06508+K06465+K03099+K03084+K04446+K05730+K03083+K06268+K04448+K12362+K05730+…
Fc epsilon RI signaling pathway	ko04664	79	Manis_javanica_newGene_10431;Manis_javanica_newGene_10432;Manis_javanica_newGene_1070;Manis_javanica_newGene_2248;Manis_javanica_newGene_3877;Manis_javanica_newGene_8784;Manis_javanica_newGene_9888;gene10180;gene1095;gene11317;gene11427;gene12015;gene12177;gene12193;gene12568;gene1270;gene13199;gene15258;gene15537;gene16153;gene16239;gene17532;gene18170;gene18485;gene18531;gene19089;gene19424;gen…	K06856+K06856+K06856+K05854+K06856+K06856+K06856+K04371+K00922+K05730+K06276+K05859+K04364+K04371+K08090+K16342+K05730+K05428+K03084+K08089+K04433+K00922+K01116+K04392+K07362+K07983+K02833+K04364+K00922+K04431+K03084+K16342+K02649+K05855+K04440+K04369+K16342+K16342+K16342+K04440+K03099+K03084+K05730+K05730+K05430+K05435+K04364+K03084+K00922+K02649+K04456+K06856+K03099+K04368+K02649+K07860+K04432+…
Fc gamma R-mediated phagocytosis	ko04666	107	Manis_javanica_newGene_10431;Manis_javanica_newGene_10432;Manis_javanica_newGene_1070;Manis_javanica_newGene_12620;Manis_javanica_newGene_2248;Manis_javanica_newGene_3877;Manis_javanica_newGene_4877;Manis_javanica_newGene_8784;Manis_javanica_newGene_9888;gene10180;gene10370;gene1095;gene11317;gene12015;gene12079;gene12193;gene12345;gene12648;gene12754;gene13199;gene13450;gene14442;gene14443;gene1…	K06856+K06856+K06856+K06478+K05854+K06856+K12488+K06856+K06856+K04371+K04718+K00922+K05730+K05859+K05756+K04371+K12488+K04688+K05753+K05730+K05765+K05757+K05757+K01115+K00889+K05768+K01115+K03084+K13536+K05748+K15909+K01115+K18050+K00922+K06068+K01116+K12488+K04392+K07362+K05755+K05747+K04438+K00922+K03084+K06498+K02649+K06478+K05747+K01080+K04409+K12561+K05855+K02677+K03084+K05730+K05744+K06274+…
TNF signaling pathway	ko04668	115	Manis_javanica_newGene_11333;Manis_javanica_newGene_3657;Manis_javanica_newGene_4536;Manis_javanica_newGene_7716;gene10180;gene10334;gene10587;gene10802;gene10931;gene1095;gene11293;gene11411;gene11624;gene12193;gene12337;gene12475;gene12545;gene12577;gene12889;gene12915;gene13169;gene13342;gene13885;gene13893;gene15146;gene157;gene15890;gene15981;gene16233;gene16239;gene16615;gene17140;gene17232…	K04398+K05505+K04390+K05870+K04371+K05405+K04398+K04427+K11859+K00922+K09028+K07209+K07763+K04371+K07210+K05453+K04445+K04426+K02373+K12671+K05141+K09048+K04734+K04379+K09258+K09048+K04400+K05508+K09047+K04433+K05870+K12793+K11987+K00922+K03174+K09048+K03173+K04450+K12499+K16510+K04696+K09048+K16366+K10165+K06494+K00922+K04397+K04467+K04431+K08849+K15637+K08847+K05629+K02649+K05629+K06527+K04440+…
Leukocyte transendothelial migration	ko04670	132	Manis_javanica_newGene_6686;Manis_javanica_newGene_883;gene10465;gene10928;gene1095;gene10964;gene11070;gene11143;gene11317;gene12015;gene12090;gene12222;gene12482;gene12547;gene12715;gene12792;gene12835;gene13199;gene13390;gene13679;gene13929;gene13963;gene13975;gene14187;gene15477;gene15664;gene15721;gene15758;gene16223;gene16745;gene17057;gene17147;gene17491;gene17532;gene17826;gene18095;gene1…	K10031+K06087+K05700+K05718+K00922+K06087+K05692+K05699+K05730+K05859+K10351+K06461+K04630+K06785+K04189+K05699+K05691+K05730+K04514+K05690+K06520+K06087+K08013+K04630+K08008+K12758+K10031+K12756+K05691+K07293+K07873+K05732+K06087+K00922+K06087+K06089+K05699+K12757+K12757+K01116+K07836+K04392+K06087+K06483+K06787+K17388+K00922+K06514+K07293+K06087+K04513+K02649+K06088+K06527+K05702+K02105+K01398+…
Intestinal immune network for IgA production	ko04672	49	Manis_javanica_newGene_10431;Manis_javanica_newGene_10432;Manis_javanica_newGene_1070;Manis_javanica_newGene_3877;Manis_javanica_newGene_6686;Manis_javanica_newGene_8784;Manis_javanica_newGene_9888;gene10334;gene11343;gene12499;gene12715;gene14326;gene14333;gene14506;gene1524;gene15258;gene15472;gene15721;gene16643;gene1685;gene1698;gene19413;gene19415;gene19609;gene1973;gene20747;gene20996;gene2…	K06856+K06856+K06856+K06856+K10031+K06856+K06856+K05405+K05476+K06752+K04189+K13073+K05443+K06710+K06590+K05428+K05475+K10031+K05150+K05413+K05074+K06470+K06713+K06483+K13375+K03161+K06752+K06752+K05429+K04184+K06752+K06752+K06752+K05433+K04185+K04466+K13072+K05151+K03159+K05430+K06856+K05513+K06779+K05412+K03160+K06752+K06752+K06752+K10989
Circadian rhythm	ko04710	35	Manis_javanica_newGene_6038;Manis_javanica_newGene_7716;gene10236;gene10397;gene10999;gene11800;gene12743;gene13330;gene13674;gene14476;gene14606;gene14915;gene16254;gene16605;gene16615;gene16797;gene1777;gene18167;gene19033;gene19055;gene1946;gene20407;gene21690;gene22134;gene22590;gene22752;gene24125;gene24563;gene2962;gene5299;gene6400;gene7450;gene8071;gene8625;gene8638;	K07200+K05870+K02223+K10269+K08960+K02295+K02295+K07200+K02296+K08533+K07199+K02296+K09026+K02223+K05870+K07200+K03362+K02633+K07199+K07198+K07200+K02633+K03362+K08959+K07198+K03728+K03347+K03730+K07200+K03729+K03868+K02633+K05870+K08532+K08534
Circadian entrainment	ko04713	121	Manis_javanica_newGene_10444;Manis_javanica_newGene_7420;Manis_javanica_newGene_7716;gene10131;gene10132;gene10180;gene10201;gene10203;gene10463;gene11140;gene11300;gene1150;gene11627;gene12193;gene12390;gene12482;gene12545;gene12890;gene12892;gene13039;gene13079;gene1314;gene13248;gene13369;gene13378;gene13725;gene13893;gene14119;gene14155;gene14187;gene14217;gene14255;gene14774;gene14783;gene14…	K02183+K04538+K05870+K04548+K04546+K04371+K16513+K16513+K04515+K04961+K04347+K04963+K04587+K04371+K04515+K04630+K04445+K12319+K05210+K04962+K05858+K05002+K08042+K13240+K04962+K04851+K04379+K04854+K04515+K04630+K04855+K04960+K08041+K04345+K07825+K05209+K04347+K04997+K07843+K02183+K05870+K05209+K16513+K04544+K02183+K04632+K08049+K05210+K04999+K12318+K02633+K08047+K05858+K05000+K04345+K04345+K12318+…
Long-term potentiation	ko04720	71	Manis_javanica_newGene_10444;gene10180;gene10269;gene10454;gene10463;gene12088;gene12193;gene1223;gene12390;gene12511;gene12892;gene13079;gene14155;gene14255;gene1441;gene14578;gene14774;gene14783;gene15112;gene15375;gene16514;gene16883;gene17159;gene17596;gene18236;gene18268;gene18469;gene19050;gene19167;gene19312;gene19424;gene20080;gene21440;gene2151;gene22489;gene22654;gene22975;gene23224;gen…	K02183+K04371+K08845+K04348+K04515+K06269+K04371+K04373+K04515+K04603+K05210+K05858+K04515+K04960+K04348+K04959+K08041+K04345+K05209+K04373+K02183+K05209+K02183+K05210+K06269+K07836+K05858+K04345+K04345+K08050+K02833+K05198+K02183+K05211+K04498+K04369+K04515+K02677+K02183+K02183+K06268+K05212+K04604+K04850+K02677+K02677+K04365+K05208+K05869+K04348+K04603+K04368+K08014+K06269+K04348+K04515+K05858+…
Synaptic vesicle cycle	ko04721	66	Manis_javanica_newGene_2860;Manis_javanica_newGene_4333;Manis_javanica_newGene_4899;gene10026;gene1016;gene10224;gene10260;gene10430;gene11272;gene11339;gene11429;gene11720;gene11807;gene11883;gene11902;gene12467;gene12629;gene12859;gene13459;gene13559;gene13582;gene137;gene13817;gene15167;gene15631;gene15788;gene16870;gene17149;gene17404;gene17820;gene184;gene18855;gene20406;gene20487;gene20760;…	K02153+K04344+K11824+K15295+K02148+K04646+K15293+K02153+K04344+K08486+K02155+K02144+K02150+K12302+K11824+K11825+K02149+K15294+K15290+K12302+K04645+K04644+K15015+K02146+K03661+K04849+K02154+K11827+K02150+K04646+K08155+K02148+K13504+K11824+K02154+K15293+K08486+K15296+K02147+K08155+K15291+K12302+K01528+K02152+K02154+K08486+K06027+K01528+K15293+K15295+K07882+K14636+K04344+K02146+K15293+K02151+K02152+…
Neurotrophin signaling pathway	ko04722	133	Manis_javanica_newGene_10444;Manis_javanica_newGene_11255;Manis_javanica_newGene_4227;gene10180;gene10463;gene1095;gene11015;gene11411;gene11427;gene117;gene11861;gene11868;gene11973;gene12015;gene12022;gene12093;gene12177;gene12193;gene1223;gene12390;gene12545;gene12577;gene12885;gene13021;gene1323;gene13533;gene13721;gene13885;gene14079;gene14155;gene14334;gene15375;gene15459;gene16024;gene1651…	K02183+K04733+K06619+K04371+K04515+K00922+K12463+K07209+K06276+K04421+K02159+K12457+K04360+K05859+K12388+K12459+K04364+K04371+K04373+K04515+K04445+K04426+K04389+K04355+K12462+K05101+K17449+K04734+K12464+K04515+K04443+K04373+K04451+K17448+K02183+K12461+K07293+K04732+K02183+K00922+K06068+K06277+K05872+K01116+K06279+K04505+K07836+K02158+K04392+K12462+K04731+K06619+K02833+K04438+K04364+K04464+K00922+…
Retrograde endocannabinoid signaling	ko04723	109	Manis_javanica_newGene_4333;Manis_javanica_newGene_7420;gene10131;gene10132;gene10180;gene11124;gene11272;gene11300;gene11883;gene11918;gene12193;gene12482;gene12511;gene12887;gene13079;gene1314;gene13248;gene13559;gene13725;gene13817;gene14187;gene14255;gene14266;gene14455;gene14578;gene14740;gene14774;gene14783;gene14810;gene15412;gene15788;gene16011;gene16061;gene16188;gene16473;gene17157;gene…	K04344+K04538+K04548+K04546+K04371+K05175+K04344+K04347+K12302+K05190+K04371+K04630+K04603+K05175+K05858+K05002+K08042+K12302+K04851+K15015+K04630+K04960+K05186+K04277+K04959+K05189+K08041+K04345+K07825+K04853+K04849+K04347+K15528+K04997+K05175+K04544+K05181+K11987+K08049+K04999+K08047+K05858+K13806+K05000+K04345+K04345+K05175+K05175+K08046+K05198+K04537+K04538+K08042+K08044+K05186+K15291+K12302+…
Glutamatergic synapse	ko04724	136	Manis_javanica_newGene_11584;Manis_javanica_newGene_4333;Manis_javanica_newGene_7420;gene10131;gene10132;gene10180;gene10454;gene10615;gene11272;gene11300;gene11667;gene11883;gene12130;gene12193;gene12241;gene12308;gene12482;gene12511;gene12694;gene1270;gene12892;gene13079;gene13248;gene13259;gene13559;gene13725;gene14154;gene14161;gene14186;gene14187;gene14255;gene1441;gene14578;gene14618;gene14…	K15009+K04344+K04538+K04548+K04546+K04371+K04348+K15009+K04344+K04347+K01425+K12302+K05202+K04371+K04608+K05203+K04630+K04603+K11828+K16342+K05210+K05858+K08042+K15010+K12302+K04851+K01425+K04605+K13576+K04630+K04960+K04348+K04959+K01115+K08041+K04345+K07825+K15009+K05209+K01115+K05613+K04347+K04997+K01915+K04608+K05209+K15010+K01115+K04544+K04632+K15010+K08049+K05204+K05210+K08047+K05858+K15009+…
Cholinergic synapse	ko04725	127	Manis_javanica_newGene_4333;Manis_javanica_newGene_7420;Manis_javanica_newGene_7716;gene10131;gene10132;gene10180;gene10463;gene1066;gene1095;gene10998;gene11272;gene11300;gene12193;gene12390;gene12482;gene13079;gene13248;gene13342;gene1355;gene13725;gene13893;gene14155;gene14187;gene14255;gene14578;gene14774;gene14783;gene14810;gene14852;gene15412;gene157;gene15788;gene16011;gene16188;gene16233;…	K04344+K04538+K05870+K04548+K04546+K04371+K04515+K14387+K00922+K04998+K04344+K04347+K04371+K04515+K04630+K05858+K08042+K09048+K04929+K04851+K04379+K04515+K04630+K04960+K04959+K08041+K04345+K07825+K04635+K04853+K09048+K04849+K04347+K04997+K09047+K05870+K04544+K08049+K00922+K04132+K09048+K08047+K05858+K04926+K05000+K09048+K04345+K04345+K02833+K04926+K08046+K00922+K01049+K04537+K04538+K08042+K04996+…
Serotonergic synapse	ko04726	119	Manis_javanica_newGene_13717;Manis_javanica_newGene_4333;Manis_javanica_newGene_7420;Manis_javanica_newGene_8833;Manis_javanica_newGene_9551;gene0;gene1;gene10131;gene10132;gene10180;gene10269;gene11193;gene11272;gene11300;gene11652;gene12193;gene12195;gene12216;gene12482;gene12684;gene1270;gene13079;gene1314;gene13515;gene13516;gene13725;gene14187;gene14255;gene14578;gene14783;gene14810;gene1505…	K07418+K04344+K04538+K08022+K07414+K00274+K00274+K04548+K04546+K04371+K08845+K04163+K04344+K04347+K04157+K04371+K00502+K00461+K04630+K00458+K16342+K05858+K05002+K04819+K04819+K04851+K04630+K04960+K04959+K04345+K07825+K00509+K04853+K04849+K00502+K04347+K07428+K04997+K05037+K04162+K04544+K05181+K04632+K11987+K04999+K08155+K07414+K05858+K05000+K04345+K04345+K02833+K04157+K04537+K07413+K04538+K01593+…
GABAergic synapse	ko04727	94	Manis_javanica_newGene_4333;Manis_javanica_newGene_7420;gene10131;gene10132;gene10623;gene11124;gene11212;gene11272;gene11300;gene11649;gene11667;gene11918;gene12288;gene12482;gene12698;gene12887;gene13026;gene13248;gene13725;gene13817;gene14154;gene14186;gene14187;gene14266;gene14740;gene14774;gene14783;gene14810;gene15412;gene15788;gene15875;gene16011;gene16231;gene16473;gene17157;gene17189;gen…	K04344+K04538+K04548+K04546+K13524+K05175+K04647+K04344+K04347+K15376+K01425+K05190+K01580+K04630+K08341+K05175+K05704+K08042+K04851+K15015+K01425+K13576+K04630+K05186+K05189+K08041+K04345+K07825+K04853+K04849+K14992+K04347+K01915+K05175+K04544+K05181+K08049+K08047+K05000+K04345+K04345+K05175+K05175+K08046+K14990+K14207+K15375+K04537+K04538+K08042+K08044+K15376+K15375+K01580+K15376+K05186+K05190+…
Dopaminergic synapse	ko04728	151	Manis_javanica_newGene_10444;Manis_javanica_newGene_1976;Manis_javanica_newGene_4333;Manis_javanica_newGene_7420;Manis_javanica_newGene_7716;gene0;gene1;gene10131;gene10132;gene10236;gene10454;gene10463;gene10745;gene11272;gene11300;gene12088;gene12151;gene12390;gene12482;gene12892;gene13079;gene1314;gene13342;gene13674;gene13676;gene13725;gene13893;gene13968;gene14155;gene14187;gene14255;gene144…	K02183+K11584+K04344+K04538+K05870+K00274+K00274+K04548+K04546+K02223+K04348+K04515+K10396+K04344+K04347+K06269+K05036+K04515+K04630+K05210+K05858+K05002+K09048+K02296+K10396+K04851+K04379+K00501+K04515+K04630+K04960+K04348+K04959+K04345+K07825+K02296+K05209+K09048+K04849+K04347+K04997+K09047+K11584+K04633+K02183+K02223+K05870+K03456+K04354+K05209+K04382+K04382+K04544+K02183+K04632+K11583+K05210+…
Long-term depression	ko04730	70	Manis_javanica_newGene_2248;Manis_javanica_newGene_4333;Manis_javanica_newGene_5537;gene10180;gene10269;gene11140;gene11272;gene12193;gene12240;gene12482;gene12511;gene1270;gene12890;gene13079;gene13291;gene13369;gene1340;gene14187;gene14255;gene14578;gene14756;gene14852;gene15066;gene16752;gene17015;gene17103;gene17198;gene18101;gene18469;gene1928;gene19295;gene19297;gene19424;gene20080;gene2026…	K05854+K04344+K04346+K04371+K08845+K04961+K04344+K04371+K05256+K04630+K04603+K16342+K12319+K05858+K05087+K13240+K05087+K04630+K04960+K04959+K04578+K04635+K05207+K03456+K04382+K04382+K04632+K12318+K05858+K05459+K12318+K12319+K02833+K05198+K03456+K04632+K16342+K04346+K07376+K04369+K16342+K16342+K16342+K02677+K02677+K02677+K04365+K04961+K04630+K04344+K04961+K05199+K04603+K04535+K04368+K04639+K05207+…
Olfactory transduction	ko04740	969	Manis_javanica_newGene_10444;Manis_javanica_newGene_9490;gene10024;gene10154;gene10358;gene10359;gene10390;gene10415;gene10416;gene10417;gene10418;gene10463;gene10494;gene10495;gene10496;gene10573;gene10574;gene10575;gene10717;gene10718;gene10720;gene10722;gene10724;gene10725;gene10747;gene10782;gene10932;gene10933;gene10934;gene11000;gene11001;gene11049;gene11092;gene11093;gene11094;gene11095;ge…	K02183+K04257+K08327+K04257+K04257+K04257+K04257+K04257+K04257+K04257+K04257+K04515+K04257+K04257+K04257+K04257+K04257+K04257+K04257+K04257+K04257+K04257+K04257+K04257+K04257+K04257+K04257+K04257+K04257+K04257+K04257+K04257+K04257+K04257+K04257+K04257+K04257+K04257+K04257+K04257+K04257+K04257+K04257+K04257+K04257+K04257+K04257+K04257+K04257+K04257+K04257+K04257+K04257+K04257+K04257+K04257+K04257+…
Taste transduction	ko04742	36	Manis_javanica_newGene_4333;gene10947;gene11152;gene11272;gene1362;gene14255;gene14783;gene14810;gene15574;gene15788;gene15847;gene15848;gene17198;gene1814;gene19050;gene19167;gene1956;gene20540;gene20854;gene21779;gene21826;gene22319;gene23221;gene23223;gene2361;gene23628;gene25001;gene26637;gene26859;gene26944;gene3222;gene3358;gene4293;gene5778;gene9462;gene9927;	K04344+K08474+K08474+K04344+K04828+K04960+K04345+K07825+K08474+K04849+K04827+K04825+K04632+K04626+K04345+K04345+K08046+K04632+K08044+K04607+K08474+K04624+K08474+K08474+K08474+K04547+K04824+K04344+K04625+K08474+K04625+K04885+K04885+K04540+K08048+K04536
Phototransduction	ko04744	31	Manis_javanica_newGene_10444;Manis_javanica_newGene_12671;gene10131;gene10266;gene11561;gene11718;gene12481;gene12864;gene14185;gene14608;gene16514;gene17122;gene17159;gene20548;gene20815;gene21151;gene21440;gene22687;gene23382;gene23670;gene2449;gene26099;gene2780;gene2781;gene3037;gene3696;gene377;gene4677;gene7917;gene8744;gene9927;	K02183+K02183+K04548+K12321+K00909+K08718+K04631+K13756+K04631+K04439+K02183+K04952+K02183+K13759+K04631+K12321+K02183+K04439+K02183+K02183+K00909+K04250+K08328+K08328+K08718+K04948+K02183+K13765+K13764+K13749+K04536
Inflammatory mediator regulation of TRP channels	ko04750	107	Manis_javanica_newGene_10444;Manis_javanica_newGene_13717;gene10398;gene10463;gene1095;gene11652;gene12015;gene12088;gene12390;gene12684;gene1270;gene13026;gene13079;gene13248;gene1362;gene14126;gene14155;gene14255;gene1448;gene14578;gene14774;gene14783;gene15852;gene15892;gene16239;gene16514;gene16515;gene17159;gene17198;gene17402;gene17453;gene17523;gene17532;gene1757;gene18170;gene18213;gene18…	K02183+K07418+K03916+K04515+K00922+K04157+K05859+K06269+K04515+K00458+K16342+K05704+K05858+K08042+K04828+K04983+K04515+K04960+K18051+K04959+K08041+K04345+K04386+K04261+K04433+K02183+K04984+K02183+K04632+K18050+K08049+K04829+K00922+K06068+K01116+K08047+K06269+K05858+K04345+K04345+K05459+K04832+K08046+K00922+K04157+K07413+K08042+K04632+K07413+K16342+K08044+K03176+K02649+K02183+K04723+K04971+K08049+…
Regulation of actin cytoskeleton	ko04810	251	Manis_javanica_newGene_12241;Manis_javanica_newGene_13122;Manis_javanica_newGene_3414;Manis_javanica_newGene_51;Manis_javanica_newGene_5537;Manis_javanica_newGene_804;gene10161;gene10180;gene10269;gene10398;gene10465;gene10589;gene1069;gene10928;gene1095;gene11070;gene11143;gene11171;gene1121;gene11300;gene11317;gene11852;gene11895;gene11948;gene12079;gene12088;gene12090;gene12187;gene12193;gene1…	K06485+K05766+K06585+K05746+K04346+K05692+K05095+K04371+K08845+K03916+K05700+K00921+K06585+K05718+K00922+K05692+K05699+K05740+K05745+K04347+K05730+K04358+K07829+K06586+K05756+K06269+K10351+K06525+K04371+K06461+K06480+K06493+K06587+K05753+K05699+K05704+K05730+K04514+K05765+K00907+K04358+K04526+K04362+K05757+K05757+K01313+K05746+K00889+K06594+K06462+K05768+K05751+K16848+K06590+K06524+K06524+K12758+…
Insulin signaling pathway	ko04910	166	Manis_javanica_newGene_10444;Manis_javanica_newGene_12671;Manis_javanica_newGene_6038;gene10089;gene10180;gene10269;gene10324;gene1095;gene11411;gene11427;gene11484;gene11602;gene11864;gene11969;gene12011;gene12088;gene12177;gene12193;gene12294;gene1262;gene12648;gene13144;gene13197;gene13287;gene13330;gene13480;gene13573;gene13576;gene13721;gene13967;gene14524;gene14606;gene14783;gene14881;gene1…	K02183+K02183+K07200+K00693+K04371+K08845+K07190+K00922+K07209+K06276+K11262+K07189+K00693+K02991+K04695+K06269+K04364+K04371+K07204+K00688+K04688+K05695+K07196+K04375+K07200+K13296+K00844+K03259+K17449+K04526+K07187+K07199+K04345+K07189+K04707+K17453+K11262+K07189+K07195+K04527+K03841+K17448+K04372+K15909+K04440+K02183+K04739+K04694+K07200+K00871+K07190+K17446+K02183+K07194+K07191+K00922+K06277+…
Insulin secretion	ko04911	113	Manis_javanica_newGene_5678;Manis_javanica_newGene_6639;Manis_javanica_newGene_7716;gene1012;gene1019;gene10463;gene10650;gene11234;gene11389;gene11418;gene11627;gene1186;gene11875;gene12390;gene12846;gene1286;gene13039;gene13079;gene1311;gene1312;gene13248;gene13342;gene13378;gene13477;gene13563;gene13725;gene13967;gene14155;gene14255;gene14774;gene14783;gene14852;gene15412;gene15460;gene157;gen…	K05274+K05274+K05870+K01540+K05259+K04515+K04325+K15297+K08424+K04194+K04587+K04945+K04979+K04515+K15297+K01538+K04962+K05858+K01539+K01539+K08042+K09048+K04962+K04936+K04941+K04851+K04526+K04515+K04960+K08041+K04345+K04635+K04853+K01540+K09048+K05032+K05004+K01540+K09047+K04936+K05870+K04632+K08049+K04939+K07299+K09048+K04938+K04944+K08047+K04450+K07594+K05858+K09048+K04345+K04345+K04962+K08046+…
GnRH signaling pathway	ko04912	100	Manis_javanica_newGene_10444;Manis_javanica_newGene_12671;gene10180;gene10463;gene11624;gene117;gene11866;gene12177;gene12193;gene12390;gene12400;gene1270;gene13026;gene13079;gene13248;gene13287;gene13725;gene14155;gene14255;gene14414;gene14578;gene14618;gene14774;gene14783;gene14852;gene15398;gene15412;gene16239;gene16445;gene16453;gene16514;gene16645;gene17141;gene17159;gene17198;gene17302;gene…	K02183+K02183+K04371+K04515+K07763+K04421+K08521+K04364+K04371+K04515+K04420+K16342+K05704+K05858+K08042+K04375+K04851+K04515+K04960+K04428+K04959+K01115+K08041+K04345+K04635+K01115+K04853+K04433+K04440+K05252+K02183+K08522+K01115+K02183+K04632+K04361+K08049+K08047+K05858+K04345+K04345+K02833+K08046+K04364+K04464+K04431+K08042+K04632+K16342+K08044+K02183+K04416+K08049+K04440+K04369+K04515+K16342+…
Ovarian steroidogenesis	ko04913	55	Manis_javanica_newGene_13717;gene11866;gene12013;gene12216;gene1270;gene13248;gene13291;gene1340;gene13967;gene14150;gene14774;gene14783;gene15799;gene16645;gene17198;gene17232;gene17453;gene18213;gene19050;gene19167;gene1928;gene1956;gene19888;gene20420;gene20540;gene20840;gene20854;gene20941;gene22488;gene22567;gene22666;gene22984;gene22988;gene22990;gene23589;gene24544;gene25723;gene25870;gene…	K07418+K08521+K13368+K00461+K16342+K08042+K05087+K05087+K04526+K05498+K08041+K04345+K04527+K08522+K04632+K11987+K08049+K08047+K04345+K04345+K05459+K08046+K16931+K08042+K04632+K16342+K08044+K00512+K08049+K04248+K04247+K16342+K16342+K16342+K00044+K07410+K07434+K08049+K07408+K07408+K07418+K00498+K00070+K16620+K13885+K05498+K04119+K13373+K08045+K08045+K05250+K05250+K08043+K08048+K12473
Progesterone-mediated oocyte maturation	ko04914	110	Manis_javanica_newGene_12746;Manis_javanica_newGene_9791;gene10180;gene10269;gene10885;gene10886;gene1095;gene11554;gene11678;gene12078;gene12193;gene1223;gene12482;gene13248;gene13291;gene1340;gene13480;gene13967;gene13999;gene14187;gene14691;gene14774;gene14783;gene15375;gene15932;gene16299;gene16445;gene17398;gene17453;gene17532;gene17846;gene17952;gene18069;gene18213;gene18237;gene18428;gene1…	K02537+K06638+K04371+K08845+K08694+K02602+K00922+K03353+K06627+K03354+K04371+K04373+K04630+K08042+K05087+K05087+K13296+K04526+K06645+K04630+K06638+K08041+K04345+K04373+K06627+K02602+K04440+K02602+K08049+K00922+K05868+K13296+K04079+K08047+K08694+K12456+K03351+K06638+K04345+K04345+K05459+K02602+K08046+K00922+K05866+K13296+K08042+K05868+K08044+K03355+K06631+K02649+K08049+K04440+K05867+K04440+K13728+…
Estrogen signaling pathway	ko04915	115	Manis_javanica_newGene_10444;Manis_javanica_newGene_7716;gene10180;gene1095;gene12145;gene12177;gene12193;gene12482;gene12511;gene13026;gene13079;gene1314;gene13248;gene13342;gene13721;gene13893;gene14187;gene14255;gene14578;gene14714;gene14774;gene14783;gene1554;gene157;gene16024;gene16188;gene16233;gene16514;gene16615;gene17159;gene17198;gene17302;gene17453;gene17532;gene1757;gene17773;gene1802…	K02183+K05870+K04371+K00922+K09571+K04364+K04371+K04630+K04603+K05704+K05858+K05002+K08042+K09048+K17449+K04379+K04630+K04960+K04959+K08551+K08041+K04345+K08550+K09048+K17448+K04997+K09047+K02183+K05870+K02183+K04632+K04361+K08049+K00922+K06068+K09048+K04999+K04079+K06279+K08047+K04450+K05858+K05000+K09048+K04345+K04345+K02833+K08046+K04364+K00922+K08042+K04632+K08044+K02649+K02183+K04215+K08049+…
Melanogenesis	ko04916	114	Manis_javanica_newGene_10444;Manis_javanica_newGene_12671;Manis_javanica_newGene_6619;Manis_javanica_newGene_7716;gene10062;gene10180;gene10463;gene10511;gene10512;gene10632;gene11336;gene12193;gene12390;gene12482;gene12696;gene13079;gene13248;gene13342;gene13806;gene14155;gene14187;gene14378;gene14466;gene14774;gene14783;gene14916;gene15382;gene157;gene16286;gene1637;gene16514;gene16615;gene1665…	K02183+K02183+K04491+K05870+K04199+K04371+K04515+K01064+K00312+K00182+K02842+K04371+K04515+K04630+K02353+K05858+K08042+K09048+K00506+K04515+K04630+K09455+K00444+K08041+K04345+K02235+K00572+K09048+K01827+K01558+K02183+K05870+K04492+K01384+K04490+K02329+K02620+K02183+K04632+K08049+K00572+K09048+K02353+K08047+K05858+K08725+K04491+K09048+K04345+K16366+K04345+K02833+K01357+K03209+K08046+K00714+K08042+…
Prolactin signaling pathway	ko04917	77	Manis_javanica_newGene_11062;gene10180;gene10329;gene1095;gene11666;gene11866;gene12011;gene12177;gene12193;gene13026;gene13721;gene13893;gene13967;gene13968;gene14208;gene14714;gene15199;gene1554;gene16024;gene16625;gene16645;gene16895;gene17532;gene18185;gene18230;gene18672;gene19424;gene19765;gene19936;gene20941;gene21309;gene22510;gene22530;gene22567;gene22654;gene22978;gene23003;gene23193;ge…	K04699+K04371+K17107+K00922+K11220+K08521+K04695+K04364+K04371+K05704+K17449+K04379+K04526+K00501+K04701+K08551+K10151+K08550+K17448+K04694+K08522+K05081+K00922+K06279+K05473+K04696+K02833+K04364+K00922+K00512+K02649+K04440+K17101+K04248+K04369+K05439+K10322+K04440+K03099+K11223+K04692+K03083+K09408+K04698+K11224+K09444+K04503+K04364+K04447+K00922+K02649+K04456+K05147+K02580+K17447+K17447+K03099+…
Thyroid hormone synthesis	ko04918	87	Manis_javanica_newGene_7716;gene10048;gene1012;gene10952;gene11829;gene1233;gene12660;gene12692;gene12693;gene1286;gene13079;gene1311;gene1312;gene13248;gene13342;gene14010;gene14255;gene14578;gene14774;gene14783;gene1543;gene15460;gene157;gene16043;gene16233;gene16615;gene16645;gene17017;gene17198;gene17453;gene17773;gene18213;gene18287;gene18469;gene18523;gene18786;gene18848;gene19040;gene19050…	K05870+K09490+K01540+K09293+K17232+K15173+K08054+K10064+K10063+K01538+K05858+K01539+K01539+K08042+K09048+K04249+K04960+K04959+K08041+K04345+K17231+K01540+K09048+K01540+K09047+K05870+K08522+K00383+K04632+K08049+K09048+K08047+K04450+K05858+K06233+K04249+K15225+K09048+K04345+K04345+K08046+K00383+K08042+K04632+K00431+K08044+K00432+K04249+K08049+K09048+K02677+K00432+K09582+K10809+K02677+K02677+K14385+…
Thyroid hormone signaling pathway	ko04919	124	Manis_javanica_newGene_10963;Manis_javanica_newGene_13679;Manis_javanica_newGene_6900;Manis_javanica_newGene_7904;gene10044;gene1012;gene10180;gene1062;gene1095;gene11070;gene11187;gene11427;gene11666;gene12015;gene12193;gene12553;gene1286;gene13026;gene13079;gene1311;gene1312;gene13481;gene13732;gene14059;gene1447;gene14598;gene14783;gene14932;gene15210;gene15274;gene15459;gene15460;gene1554;gen…	K06067+K04399+K15164+K15146+K15164+K01540+K04371+K04377+K00922+K05692+K08524+K06276+K11220+K05859+K04371+K06493+K01538+K05704+K05858+K01539+K01539+K08747+K09183+K08526+K08268+K15162+K04345+K05857+K04650+K11256+K04451+K01540+K08550+K15156+K15156+K01540+K11404+K00922+K07299+K15170+K01116+K06067+K04399+K05858+K02158+K06067+K15162+K04345+K04345+K02833+K02599+K02599+K00922+K05852+K07201+K06062+K07207+…
Adipocytokine signaling pathway	ko04920	77	Manis_javanica_newGene_6038;gene11076;gene11187;gene11411;gene11900;gene12337;gene13169;gene13330;gene13885;gene14059;gene14524;gene14606;gene14755;gene15362;gene16445;gene16745;gene16797;gene17120;gene17180;gene17490;gene17574;gene17690;gene17705;gene17785;gene18071;gene18625;gene18672;gene18735;gene19002;gene19033;gene19055;gene1946;gene20113;gene20282;gene20675;gene20995;gene22255;gene22268;ge…	K07200+K07298+K08524+K07209+K08765+K07210+K05141+K07200+K04734+K08526+K07187+K07199+K08765+K07359+K04440+K07293+K07200+K17446+K05062+K07191+K01897+K07299+K07294+K03173+K05872+K06259+K04696+K08765+K01897+K07199+K07198+K07200+K17445+K04467+K01084+K07293+K07359+K01897+K04440+K07198+K04440+K04692+K01897+K03158+K04447+K03171+K05231+K04456+K07200+K07203+K01596+K01596+K05228+K02580+K18052+K07293+K07202+…
Oxytocin signaling pathway	ko04921	183	Manis_javanica_newGene_10444;Manis_javanica_newGene_13893;Manis_javanica_newGene_5675;Manis_javanica_newGene_6038;gene10180;gene10454;gene10463;gene1095;gene10998;gene11070;gene11140;gene11182;gene1150;gene11583;gene12088;gene12193;gene12390;gene12482;gene1270;gene12890;gene13026;gene13039;gene13079;gene1314;gene13189;gene13248;gene13287;gene13330;gene13378;gene13390;gene13502;gene13725;gene13893…	K02183+K17332+K01242+K07200+K04371+K04348+K04515+K00922+K04998+K05692+K04961+K08794+K04963+K17332+K06269+K04371+K04515+K04630+K16342+K12319+K05704+K04962+K05858+K05002+K04229+K08042+K04375+K07200+K04962+K04514+K00907+K04851+K04379+K17333+K04515+K04630+K04859+K04859+K04859+K04960+K04348+K04959+K07199+K08041+K04345+K12324+K07359+K04853+K04997+K08292+K12329+K02183+K07200+K02183+K04632+K11987+K04361+…
Type II diabetes mellitus	ko04930	54	Manis_javanica_newGene_4333;gene10180;gene1095;gene11272;gene11411;gene12011;gene12193;gene13573;gene13725;gene13967;gene14119;gene14524;gene15788;gene15799;gene15995;gene15996;gene16625;gene17120;gene17402;gene17490;gene17532;gene1757;gene18209;gene18357;gene18672;gene19936;gene20113;gene21309;gene2133;gene22510;gene23193;gene23563;gene23680;gene24667;gene2485;gene2579;gene25847;gene26637;gene28…	K04344+K04371+K00922+K04344+K07209+K04695+K04371+K00844+K04851+K04526+K04854+K07187+K04849+K04527+K05032+K05004+K04694+K17446+K18050+K07191+K00922+K06068+K12406+K07594+K04696+K00922+K17445+K02649+K04852+K04440+K04440+K04851+K18952+K04850+K00844+K18952+K00844+K04344+K00922+K02649+K07203+K02649+K12407+K00844+K00844+K02649+K04697+K16172+K07296+K00873+K04440+K03156+K07593+K07203
Non-alcoholic fatty liver disease (NAFLD)	ko04932	158	Manis_javanica_newGene_11333;Manis_javanica_newGene_241;Manis_javanica_newGene_4536;Manis_javanica_newGene_5659;Manis_javanica_newGene_6038;Manis_javanica_newGene_6071;Manis_javanica_newGene_7990;Manis_javanica_newGene_8282;gene10178;gene10334;gene10428;gene10527;gene10587;gene10778;gene1095;gene11085;gene11187;gene1140;gene11411;gene11861;gene12326;gene12560;gene12577;gene12630;gene12885;gene129…	K04398+K00415+K04390+K00415+K07200+K11353+K03934+K00414+K03967+K05405+K10030+K11351+K04398+K00234+K00922+K03940+K08524+K03962+K07209+K02159+K03953+K02265+K04426+K03237+K04389+K02267+K00237+K08852+K07200+K03934+K04526+K04419+K03936+K03943+K07187+K07199+K02266+K00413+K03952+K03947+K03959+K04527+K03938+K07200+K03941+K03942+K05062+K10030+K00922+K07294+K03173+K12406+K04392+K03939+K04696+K00419+K07199+…
Type I diabetes mellitus	ko04940	41	Manis_javanica_newGene_4536;gene11346;gene12288;gene12499;gene12885;gene12927;gene13967;gene1685;gene1829;gene19413;gene19929;gene2069;gene20996;gene20997;gene21317;gene21718;gene21756;gene21887;gene21888;gene21889;gene23968;gene24940;gene25792;gene25883;gene26331;gene26508;gene26693;gene3114;gene3706;gene3707;gene4532;gene4857;gene5086;gene5231;gene65;gene792;gene794;gene796;gene9656;gene9657;ge…	K04390+K06751+K01580+K06752+K04389+K04077+K04526+K05413+K05406+K06470+K05425+K07817+K06752+K06752+K05429+K04687+K01580+K06752+K06752+K06752+K07817+K01294+K07817+K06751+K04383+K06751+K04383+K06751+K06751+K06751+K05412+K01353+K04390+K04519+K07817+K06752+K06752+K06752+K03156+K05468+K07818
Maturity onset diabetes of the young	ko04950	24	gene1000;gene10084;gene10729;gene11361;gene12879;gene13967;gene1462;gene16159;gene18209;gene18357;gene18898;gene19611;gene22466;gene22885;gene2407;gene24566;gene26250;gene3993;gene4383;gene6133;gene8091;gene8503;gene8741;gene9784;	K08031+K08039+K08029+K06054+K08036+K04526+K08040+K08028+K12406+K07594+K07292+K08033+K08037+K08026+K08032+K08034+K08025+K08030+K08038+K12407+K08035+K08024+K08027+K07593
Aldosterone-regulated sodium reabsorption	ko04960	39	gene1012;gene10180;gene1095;gene11427;gene12193;gene1286;gene1311;gene1312;gene13967;gene14398;gene15460;gene15799;gene15847;gene15848;gene16043;gene17532;gene1803;gene18887;gene1928;gene19936;gene20900;gene21309;gene23224;gene24989;gene25001;gene25142;gene2822;gene2831;gene2926;gene3368;gene4728;gene556;gene6137;gene7694;gene7909;gene8259;gene857;gene953;gene9616;	K01540+K04371+K00922+K06276+K04371+K01538+K01539+K01539+K04526+K13305+K01540+K04527+K04827+K04825+K01540+K00922+K04995+K13359+K05459+K00922+K13358+K02649+K02677+K02677+K04824+K02677+K00071+K00922+K02649+K01539+K02649+K01539+K13302+K02677+K02649+K01540+K16172+K08555+K06644
Endocrine and other factor-regulated calcium reabsorption	ko04961	49	Manis_javanica_newGene_4899;gene1012;gene10224;gene10398;gene11902;gene12278;gene12467;gene1286;gene13079;gene1311;gene1312;gene13582;gene137;gene1450;gene14783;gene15460;gene1554;gene16043;gene17149;gene17198;gene17453;gene17820;gene18469;gene19050;gene19167;gene1956;gene20200;gene20487;gene20540;gene22330;gene22488;gene23224;gene24364;gene24989;gene25142;gene25870;gene3368;gene4720;gene556;gene…	K11824+K01540+K04646+K03916+K11824+K04974+K11825+K01538+K05858+K01539+K01539+K04645+K04644+K07904+K04345+K01540+K08550+K01540+K11827+K04632+K08049+K04646+K05858+K04345+K04345+K08046+K14756+K11824+K04632+K01528+K08049+K02677+K01528+K02677+K02677+K08049+K01539+K08539+K01539+K05858+K05858+K14757+K11826+K02677+K01540+K04585+K04634+K01325+K01528
Vasopressin-regulated water reabsorption	ko04962	56	Manis_javanica_newGene_11907;Manis_javanica_newGene_7716;gene1086;gene12659;gene1323;gene13342;gene13662;gene13696;gene14025;gene14258;gene1450;gene14783;gene157;gene16233;gene16364;gene16615;gene17198;gene17453;gene17773;gene18373;gene18725;gene18947;gene19040;gene19050;gene19167;gene19291;gene1956;gene20406;gene20536;gene20540;gene20647;gene21195;gene2125;gene21813;gene22007;gene22488;gene22651…	K07905+K05870+K05242+K10428+K12462+K09048+K04648+K10414+K10418+K10418+K07904+K04345+K09048+K09047+K10415+K05870+K04632+K08049+K09048+K04228+K10426+K12462+K09048+K04345+K04345+K09865+K08046+K13504+K07887+K04632+K10424+K10427+K13502+K10417+K10414+K08049+K09048+K10414+K06027+K07889+K08049+K09048+K07905+K09048+K07888+K10416+K09866+K10413+K09876+K10428+K10415+K10416+K12462+K05870+K08043+K10418
Proximal tubule bicarbonate reclamation	ko04964	23	gene1012;gene11629;gene11667;gene1286;gene1311;gene1312;gene13275;gene14099;gene14154;gene14186;gene15460;gene16043;gene19971;gene20541;gene21041;gene24384;gene32;gene3329;gene3368;gene4323;gene556;gene6317;gene8259;	K01540+K09864+K01425+K01538+K01539+K01539+K18245+K00025+K01425+K13576+K01540+K01540+K00261+K13577+K18246+K12040+K01596+K01596+K01539+K01425+K01539+K13575+K01540
Collecting duct acid secretion	ko04966	28	Manis_javanica_newGene_2860;gene1016;gene10430;gene10658;gene11429;gene11562;gene11807;gene12074;gene12629;gene13275;gene15167;gene16870;gene17404;gene18855;gene19410;gene20684;gene20760;gene21932;gene23554;gene23587;gene2823;gene4460;gene5470;gene695;gene8141;gene9263;gene9371;gene9659;	K02153+K02148+K02153+K01542+K02155+K01543+K02150+K05018+K02149+K18245+K02146+K02154+K02150+K02148+K13627+K06573+K02154+K02147+K02152+K02154+K02146+K02151+K02152+K02154+K02145+K02147+K02153+K02152
Salivary secretion	ko04970	94	Manis_javanica_newGene_10444;Manis_javanica_newGene_10662;Manis_javanica_newGene_5675;gene1012;gene10155;gene10806;gene10906;gene11295;gene1150;gene1186;gene12279;gene12393;gene1286;gene12890;gene13079;gene1311;gene1312;gene13248;gene13369;gene13477;gene14001;gene14255;gene14578;gene14680;gene14774;gene14783;gene14819;gene14977;gene15460;gene1603;gene1604;gene16043;gene1624;gene16514;gene17055;ge…	K02183+K05850+K01242+K01540+K05850+K10951+K04137+K13879+K04963+K04945+K04975+K04142+K01538+K12319+K05858+K01539+K01539+K08042+K13240+K04936+K13916+K04960+K04959+K18152+K08041+K04345+K13912+K04136+K01540+K13908+K13908+K01540+K04936+K02183+K13915+K02183+K04632+K08049+K12318+K08047+K05858+K05850+K01242+K04345+K04345+K09867+K12318+K12319+K08046+K13915+K04143+K05850+K04141+K13504+K08042+K04632+K08044+…
Gastric acid secretion	ko04971	85	Manis_javanica_newGene_10444;gene1012;gene10208;gene10463;gene10658;gene11211;gene11562;gene12390;gene12482;gene12612;gene13079;gene1311;gene1312;gene1316;gene13248;gene13275;gene13502;gene14155;gene14187;gene14255;gene14578;gene14774;gene14783;gene15460;gene16043;gene16514;gene17159;gene17198;gene17453;gene1803;gene18213;gene18282;gene18469;gene18746;gene19050;gene19167;gene19473;gene1956;gene20…	K02183+K01540+K13962+K04515+K01542+K13768+K01543+K04515+K04630+K04195+K05858+K01539+K01539+K05003+K08042+K18245+K00907+K04515+K04630+K04960+K04959+K08041+K04345+K01540+K01540+K02183+K02183+K04632+K08049+K04995+K08047+K00907+K05858+K04926+K04345+K04345+K04926+K08046+K04218+K08042+K05009+K04996+K04632+K05031+K08044+K05742+K02183+K05008+K08049+K00907+K04515+K02677+K02183+K02183+K13962+K05031+K02677+…
Pancreatic secretion	ko04972	108	Manis_javanica_newGene_10662;Manis_javanica_newGene_5675;gene1012;gene10155;gene10315;gene10350;gene10351;gene10352;gene10353;gene10680;gene10806;gene10941;gene11021;gene11418;gene12077;gene1286;gene13039;gene13079;gene1311;gene1312;gene13248;gene13275;gene13378;gene13477;gene14255;gene1450;gene14546;gene14578;gene14665;gene14680;gene14774;gene15364;gene15460;gene16043;gene1624;gene1701;gene17059…	K05850+K01242+K01540+K05850+K01047+K01047+K01047+K01047+K01047+K07884+K10951+K01312+K04588+K04194+K05853+K01538+K04962+K05858+K01539+K01539+K08042+K18245+K04962+K04936+K04960+K07904+K05853+K04959+K01312+K18152+K08041+K05853+K01540+K01540+K04936+K01300+K01047+K04632+K14075+K14074+K14073+K08049+K08047+K07836+K05858+K04392+K04926+K05850+K01242+K04926+K04962+K08046+K04962+K05850+K08042+K04632+K05028+…
Carbohydrate digestion and absorption	ko04973	43	gene1012;gene10945;gene10946;gene1095;gene1286;gene1311;gene1312;gene13573;gene13725;gene15460;gene16043;gene16448;gene16549;gene17532;gene1814;gene19936;gene20675;gene21309;gene23563;gene2485;gene25079;gene25847;gene26859;gene2831;gene2926;gene2933;gene3222;gene3309;gene3368;gene4728;gene556;gene5884;gene6542;gene6665;gene7146;gene7149;gene7608;gene7909;gene8259;gene9236;gene9363;gene9784;gene99…	K01540+K12047+K12047+K00922+K01538+K01539+K01539+K00844+K04851+K01540+K01540+K01229+K01176+K00922+K04626+K00922+K01084+K02649+K04851+K00844+K08143+K00844+K04625+K00922+K02649+K04456+K04625+K08171+K01539+K02649+K01539+K04456+K14158+K01084+K00844+K00844+K01203+K02649+K01540+K04456+K01084+K07593+K08143
Protein digestion and absorption	ko04974	102	Manis_javanica_newGene_4445;gene1012;gene10134;gene1020;gene10547;gene10828;gene10889;gene10941;gene10951;gene11606;gene11806;gene1186;gene12431;gene12639;gene12773;gene12779;gene1286;gene1311;gene1312;gene13251;gene13794;gene14310;gene14665;gene14962;gene15347;gene15460;gene15726;gene16043;gene16156;gene16289;gene16290;gene16481;gene1701;gene17121;gene17152;gene17418;gene17648;gene17753;gene1874…	K13867+K01540+K06236+K01278+K05849+K08131+K14208+K01312+K08131+K13781+K08133+K04945+K16630+K06238+K06237+K13868+K01538+K01539+K01539+K04897+K06238+K06236+K01312+K14210+K07603+K01540+K08131+K01540+K16617+K05616+K05616+K01285+K01300+K06237+K05616+K16630+K06238+K06238+K04926+K05334+K04926+K08131+K14207+K16628+K16628+K01389+K05616+K06238+K06238+K01395+K01298+K08779+K05006+K06236+K08187+K16629+K01291+…
Fat digestion and absorption	ko04975	39	gene10315;gene10350;gene10351;gene10352;gene10353;gene11115;gene15640;gene15641;gene15728;gene17059;gene17337;gene17338;gene17339;gene18109;gene18256;gene18625;gene20152;gene20717;gene21814;gene21815;gene21884;gene23912;gene24612;gene25406;gene25562;gene265;gene3830;gene4070;gene4189;gene5530;gene5532;gene5930;gene6272;gene6961;gene742;gene743;gene7899;gene9332;gene9483;	K01047+K01047+K01047+K01047+K01047+K11155+K11160+K14457+K08750+K01047+K14075+K14074+K14073+K13509+K14462+K06259+K05641+K14463+K05683+K05684+K01080+K01047+K14460+K08751+K12298+K14455+K13885+K01080+K01080+K08760+K08757+K13509+K14452+K01047+K14456+K14457+K14461+K01047+K01047
Bile secretion	ko04976	77	Manis_javanica_newGene_5083;gene10082;gene10083;gene1012;gene10683;gene10810;gene11021;gene11187;gene11190;gene11629;gene12192;gene1286;gene1311;gene1312;gene13248;gene13275;gene13560;gene13664;gene13786;gene14118;gene14774;gene14783;gene15075;gene15460;gene16043;gene1667;gene170;gene17198;gene17453;gene175;gene17624;gene17690;gene18213;gene19050;gene19066;gene19144;gene19167;gene1956;gene20092;g…	K00699+K05043+K03460+K01540+K00489+K05673+K04588+K08524+K05666+K09864+K05658+K01538+K01539+K01539+K08042+K18245+K08537+K13857+K08204+K05667+K08041+K04345+K09877+K01540+K01540+K05664+K01253+K04632+K08049+K05659+K05664+K07299+K08047+K04345+K08748+K00021+K04345+K08046+K08198+K08042+K04632+K05031+K08044+K05742+K14360+K05683+K05684+K14342+K08049+K05664+K12040+K14349+K05031+K08049+K05681+K01539+K13885+…
Vitamin digestion and absorption	ko04977	24	gene12403;gene13352;gene13568;gene14487;gene17084;gene17176;gene17339;gene17432;gene18234;gene18256;gene19651;gene23160;gene23286;gene23731;gene253;gene3034;gene3568;gene3830;gene5530;gene5532;gene675;gene7743;gene8123;gene8733;	K05665+K14620+K14610+K01435+K14610+K14616+K14073+K14622+K14621+K14462+K00678+K14616+K14618+K14615+K14616+K14592+K14386+K13885+K08760+K08757+K14617+K14609+K14617+K14619
Mineral absorption	ko04978	42	Manis_javanica_newGene_1349;gene1012;gene10860;gene11535;gene11863;gene1199;gene12279;gene1286;gene12998;gene1311;gene1312;gene13527;gene13762;gene14732;gene15460;gene15860;gene15955;gene15956;gene16043;gene16436;gene18617;gene18635;gene19409;gene20746;gene23071;gene23482;gene24384;gene2462;gene24717;gene24765;gene26573;gene3214;gene3368;gene3659;gene3660;gene3932;gene4720;gene556;gene6542;gene72…	K13625+K01540+K14734+K00510+K13625+K12347+K04975+K01538+K00510+K01539+K01539+K14685+K08370+K07213+K01540+K04981+K14737+K14738+K01540+K14736+K14710+K00522+K05334+K14739+K14688+K14706+K12040+K14739+K14686+K12347+K04975+K04981+K01539+K04982+K04982+K14735+K08539+K01539+K14158+K05011+K01540+K14078
Alzheimer's disease	ko05010	183	Manis_javanica_newGene_10444;Manis_javanica_newGene_11333;Manis_javanica_newGene_13679;Manis_javanica_newGene_241;Manis_javanica_newGene_4536;Manis_javanica_newGene_5659;Manis_javanica_newGene_6071;Manis_javanica_newGene_7990;Manis_javanica_newGene_8282;gene10178;gene10180;gene10360;gene10454;gene10527;gene10587;gene10778;gene10884;gene11078;gene11085;gene1140;gene1150;gene12077;gene12126;gene121…	K02183+K04398+K04399+K00415+K04390+K00415+K11353+K03934+K00414+K03967+K04371+K06059+K04348+K11351+K04398+K00234+K01367+K02134+K03940+K03962+K04963+K05853+K06172+K04371+K03953+K03853+K02265+K02373+K05210+K06170+K02267+K00237+K06171+K05858+K08852+K13240+K04521+K04851+K03934+K03936+K09054+K04960+K03943+K04348+K05853+K04959+K02266+K00413+K03952+K03947+K05209+K04524+K03959+K05853+K04853+K03938+K02183+…
Parkinson's disease	ko05012	147	Manis_javanica_newGene_13679;Manis_javanica_newGene_241;Manis_javanica_newGene_5659;Manis_javanica_newGene_6071;Manis_javanica_newGene_7990;Manis_javanica_newGene_8150;Manis_javanica_newGene_8282;gene10178;gene10343;gene10525;gene10527;gene10566;gene10778;gene10913;gene11078;gene11085;gene1140;gene11415;gene11919;gene12151;gene12326;gene12482;gene12560;gene12969;gene12981;gene13010;gene13644;gene…	K04399+K00415+K00415+K11353+K03934+K04552+K00414+K03967+K05688+K03178+K11351+K04266+K00234+K04558+K02134+K03940+K03962+K15041+K10578+K05036+K03953+K04630+K02265+K02267+K00237+K04555+K08669+K03934+K00501+K03936+K10698+K04630+K03943+K04345+K02266+K00413+K03952+K03947+K03959+K04633+K03938+K03941+K03942+K02135+K02084+K04557+K04554+K08155+K04399+K03939+K00419+K04345+K00236+K03935+K04345+K02128+K02136+…
Amyotrophic lateral sclerosis (ALS)	ko05014	56	Manis_javanica_newGene_13679;gene10299;gene10454;gene11861;gene12577;gene12795;gene12892;gene13169;gene13369;gene13848;gene1441;gene15112;gene15150;gene15459;gene15678;gene16239;gene16455;gene16456;gene16883;gene17596;gene17721;gene18401;gene18470;gene18485;gene19087;gene20080;gene20536;gene2151;gene22531;gene22655;gene22807;gene23158;gene23516;gene24137;gene24242;gene25000;gene25635;gene26552;ge…	K04399+K04565+K04348+K02159+K04426+K04569+K05210+K05141+K13240+K04574+K04348+K05209+K11518+K04451+K05613+K04433+K04572+K04573+K05209+K05210+K02084+K04399+K02158+K04392+K11518+K05198+K07887+K05211+K03781+K04399+K02161+K04726+K04741+K06268+K05212+K03158+K05208+K04574+K02187+K11519+K04348+K04432+K07607+K04570+K04348+K08738+K04575+K05197+K04441+K04441+K04441+K04441+K08738+K02308+K13240+K03156
Huntington's disease	ko05016	240	Manis_javanica_newGene_10429;Manis_javanica_newGene_10963;Manis_javanica_newGene_11333;Manis_javanica_newGene_13679;Manis_javanica_newGene_13751;Manis_javanica_newGene_241;Manis_javanica_newGene_4899;Manis_javanica_newGene_5659;Manis_javanica_newGene_6071;Manis_javanica_newGene_6959;Manis_javanica_newGene_7716;Manis_javanica_newGene_7990;Manis_javanica_newGene_8282;gene10178;gene10224;gene10299;g…	K10408+K06067+K04398+K04399+K04533+K00415+K11824+K00415+K11353+K10408+K05870+K03934+K00414+K03967+K04646+K04565+K11351+K10132+K04398+K00234+K10412+K02134+K03940+K04647+K03962+K15041+K03016+K02159+K11824+K04564+K03953+K11825+K02265+K11828+K10408+K05210+K02267+K00237+K04355+K05858+K10408+K09048+K10408+K04645+K04648+K04644+K03934+K03010+K03936+K03943+K10408+K10408+K02266+K00413+K03952+K03947+K10408+…
Prion diseases	ko05020	35	Manis_javanica_newGene_9656;gene10048;gene10180;gene10299;gene10334;gene10502;gene10907;gene11861;gene12193;gene13287;gene13754;gene13755;gene14569;gene14783;gene15091;gene15093;gene17787;gene18223;gene18412;gene18461;gene19050;gene19167;gene19815;gene20704;gene22654;gene23516;gene26331;gene26693;gene3519;gene3520;gene4440;gene5231;gene5674;gene8000;gene9975;	K03997+K09490+K04371+K04565+K05405+K06491+K05634+K02159+K04371+K04375+K03997+K03998+K04000+K04345+K03996+K03995+K03999+K03987+K12499+K09553+K04345+K04345+K06491+K05635+K04369+K04741+K04383+K04383+K03994+K03994+K04368+K04519+K03996+K05703+K09203
Cocaine addiction	ko05030	60	Manis_javanica_newGene_7716;gene0;gene1;gene12151;gene12482;gene12694;gene12892;gene13021;gene13342;gene13968;gene14161;gene14187;gene14783;gene15112;gene157;gene16233;gene16615;gene16883;gene17198;gene17596;gene17773;gene18287;gene184;gene19040;gene19050;gene19167;gene19811;gene19877;gene20080;gene20428;gene20540;gene20713;gene2151;gene21933;gene22287;gene22651;gene24136;gene24242;gene24271;gene…	K05870+K00274+K00274+K05036+K04630+K11828+K05210+K04355+K09048+K00501+K04605+K04630+K04345+K05209+K09048+K09047+K05870+K05209+K04632+K05210+K09048+K04450+K08155+K09048+K04345+K04345+K04145+K04605+K05198+K01593+K04632+K15840+K05211+K08155+K00274+K09048+K05213+K05212+K04448+K09029+K15839+K15494+K05208+K04630+K09048+K09048+K02580+K02090+K13765+K09049+K11716+K05214+K05870+K04450+K08045+K08045+K04735+…
Amphetamine addiction	ko05031	80	Manis_javanica_newGene_10444;Manis_javanica_newGene_7716;gene0;gene1;gene10454;gene10463;gene12055;gene12088;gene12151;gene12390;gene12892;gene13342;gene13725;gene13893;gene13968;gene14155;gene1441;gene14783;gene15112;gene157;gene16233;gene16514;gene16615;gene16883;gene17159;gene17198;gene17596;gene17773;gene18236;gene18287;gene184;gene18442;gene19040;gene19050;gene19167;gene20080;gene20428;gene2…	K02183+K05870+K00274+K00274+K04348+K04515+K15867+K06269+K05036+K04515+K05210+K09048+K04851+K04379+K00501+K04515+K04348+K04345+K05209+K09048+K09047+K02183+K05870+K05209+K02183+K04632+K05210+K09048+K06269+K04450+K08155+K11411+K09048+K04345+K04345+K05198+K01593+K04632+K15840+K02183+K05211+K08155+K00274+K09048+K04515+K02677+K02183+K04851+K02183+K05213+K06268+K05212+K04448+K09029+K04850+K02677+K15494+…
Morphine addiction	ko05032	103	Manis_javanica_newGene_1119;Manis_javanica_newGene_4;Manis_javanica_newGene_4333;Manis_javanica_newGene_7420;gene10;gene10131;gene10132;gene11124;gene11199;gene11272;gene11300;gene11918;gene12482;gene12887;gene13101;gene13139;gene1314;gene13248;gene13480;gene13817;gene14187;gene14266;gene14608;gene14703;gene14740;gene14774;gene14783;gene14810;gene15788;gene16011;gene16188;gene16473;gene17157;gene…	K08291+K13755+K04344+K04538+K18437+K04548+K04546+K05175+K13755+K04344+K04347+K05190+K04630+K05175+K04265+K13298+K05002+K08042+K13296+K15015+K04630+K05186+K04439+K13755+K05189+K08041+K04345+K07825+K04849+K04347+K04997+K05175+K04544+K05181+K04632+K08291+K08049+K13296+K04999+K08047+K05000+K04345+K04345+K05175+K05175+K13755+K08046+K04537+K18436+K13296+K04538+K08042+K18438+K04632+K08044+K05186+K04215+…
Nicotine addiction	ko05033	43	Manis_javanica_newGene_4333;gene11124;gene11272;gene11883;gene11918;gene12887;gene12892;gene13559;gene13817;gene14266;gene14740;gene15112;gene15788;gene16473;gene16883;gene17189;gene17596;gene19187;gene19188;gene20080;gene20511;gene2151;gene21990;gene2220;gene22374;gene23073;gene24136;gene24242;gene24957;gene25635;gene2580;gene26284;gene26637;gene3035;gene372;gene5718;gene586;gene6165;gene6310;ge…	K04344+K05175+K04344+K12302+K05190+K05175+K05210+K12302+K15015+K05186+K05189+K05209+K04849+K05175+K05209+K05181+K05210+K05175+K05175+K05198+K04809+K05211+K05186+K12302+K05190+K05185+K05213+K05212+K05192+K05208+K05184+K05181+K04344+K05199+K05175+K05181+K04813+K04806+K04808+K05197+K05200+K05214+K05200
Alcoholism	ko05034	156	Manis_javanica_newGene_10444;Manis_javanica_newGene_10963;Manis_javanica_newGene_4991;Manis_javanica_newGene_7420;Manis_javanica_newGene_7716;gene0;gene1;gene10131;gene10132;gene10180;gene10269;gene10323;gene10414;gene10566;gene10613;gene11300;gene11422;gene11748;gene11749;gene11753;gene11755;gene11756;gene11761;gene11762;gene11763;gene11764;gene11765;gene11973;gene12088;gene12151;gene12177;gene1…	K02183+K06067+K11251+K04538+K05870+K00274+K00274+K04548+K04546+K04371+K08845+K11405+K11406+K04266+K15985+K04347+K11251+K11252+K11251+K11252+K11251+K11252+K11253+K11251+K11252+K11251+K11253+K04360+K06269+K05036+K04364+K04371+K11251+K11252+K05256+K04630+K05210+K04355+K09048+K17449+K00501+K04630+K07825+K05209+K04267+K11407+K07359+K09048+K04347+K17448+K09047+K02183+K11404+K05870+K11253+K05209+K04544+…
Bacterial invasion of epithelial cells	ko05100	89	gene10224;gene10465;gene1095;gene10981;gene10982;gene10983;gene11025;gene11070;gene11089;gene1111;gene11398;gene12079;gene12754;gene12835;gene13026;gene13190;gene13391;gene13582;gene137;gene1371;gene13721;gene14362;gene14442;gene14443;gene14592;gene15147;gene15663;gene16024;gene16058;gene1614;gene16223;gene1679;gene17532;gene17820;gene17994;gene17997;gene18185;gene18485;gene18823;gene19219;gene19…	K04646+K05700+K00922+K05099+K06278+K12958+K13738+K05692+K13736+K07863+K16942+K05756+K05753+K05691+K05704+K12959+K13744+K04645+K04644+K12366+K17449+K16939+K05757+K05757+K07863+K04707+K13737+K17448+K05689+K05748+K05691+K06106+K00922+K04646+K16939+K05717+K06279+K04392+K05755+K05747+K13708+K06484+K04438+K00922+K04707+K09593+K04513+K02649+K05747+K06272+K01528+K06106+K02105+K16938+K05691+K13728+K01528+…
Epithelial cell signaling in Helicobacter pylori infection	ko05120	1	gene4034;	K02580
Pathogenic Escherichia coli infection	ko05130	1	gene19219;	K05747
Shigellosis	ko05131	2	gene19219;gene4034;	K05747+K02580
Salmonella infection	ko05132	89	Manis_javanica_newGene_3657;Manis_javanica_newGene_804;gene10180;gene10334;gene10428;gene11070;gene1111;gene11323;gene12079;gene12193;gene12208;gene12219;gene12518;gene12554;gene12754;gene12982;gene13390;gene13696;gene13893;gene14442;gene14443;gene14592;gene14940;gene15441;gene1614;gene16364;gene16445;gene17372;gene17437;gene17676;gene18485;gene18823;gene19219;gene19852;gene20553;gene20945;gene21…	K05505+K05692+K04371+K05405+K10030+K05692+K07863+K05701+K05756+K04371+K10160+K12799+K04729+K10407+K05753+K05482+K04514+K10414+K04379+K05757+K05757+K07863+K06071+K07897+K05748+K10415+K04440+K05759+K10030+K05759+K04392+K05755+K05747+K17388+K05692+K05132+K15348+K05408+K05408+K12964+K04687+K06071+K05747+K10414+K04440+K04440+K10414+K05133+K04448+K05758+K04437+K06071+K04383+K04383+K06071+K07898+K10416+…
Pertussis	ko05133	75	Manis_javanica_newGene_10444;Manis_javanica_newGene_11255;gene10180;gene10334;gene10428;gene11897;gene12193;gene12208;gene12219;gene12222;gene12370;gene12482;gene12518;gene13195;gene13450;gene13509;gene13607;gene13686;gene13893;gene14187;gene14333;gene16514;gene16546;gene17159;gene17437;gene18223;gene1829;gene18799;gene19318;gene19504;gene19929;gene20224;gene20228;gene2026;gene21032;gene21134;gen…	K02183+K04733+K04371+K05405+K10030+K05411+K04371+K10160+K12799+K06461+K05400+K04630+K04729+K03990+K05765+K10067+K05426+K04001+K04379+K04630+K05443+K02183+K12800+K02183+K10030+K03987+K05406+K05409+K06484+K08727+K05425+K05506+K04730+K04397+K04513+K12800+K10155+K02183+K01330+K01331+K04440+K04440+K02183+K02183+K04003+K04002+K04002+K04448+K09444+K04630+K06464+K04383+K04383+K05765+K02187+K03175+K03994+…
Legionellosis	ko05134	55	Manis_javanica_newGene_11333;Manis_javanica_newGene_13679;Manis_javanica_newGene_2295;Manis_javanica_newGene_3657;gene10334;gene10428;gene10513;gene10587;gene11116;gene12208;gene12219;gene12222;gene12518;gene12927;gene12982;gene13195;gene13885;gene15588;gene16345;gene16728;gene17437;gene17721;gene1829;gene18401;gene19929;gene2026;gene22655;gene22723;gene23122;gene23159;gene23442;gene2374;gene2483…	K04398+K04399+K03231+K05505+K05405+K10030+K07937+K04398+K09414+K10160+K12799+K06461+K04729+K04077+K05482+K03990+K04734+K13525+K07874+K04469+K10030+K02084+K05406+K04399+K05425+K04397+K04399+K15464+K03231+K15485+K03231+K07953+K03283+K07953+K03283+K15464+K04011+K14416+K06464+K03283+K02187+K10159+K08517+K03283+K08823+K02580+K04391+K04519+K08738+K03233+K07875+K08738+K04735+K03283+K03156
Leishmaniasis	ko05140	72	Manis_javanica_newGene_10431;Manis_javanica_newGene_10432;Manis_javanica_newGene_1070;Manis_javanica_newGene_11255;Manis_javanica_newGene_3877;Manis_javanica_newGene_8784;Manis_javanica_newGene_9888;gene10180;gene10802;gene11666;gene12193;gene12208;gene12222;gene12499;gene12518;gene13195;gene13287;gene13885;gene13893;gene14333;gene14450;gene15621;gene15761;gene17022;gene17232;gene1829;gene19609;g…	K06856+K06856+K06856+K04733+K06856+K06856+K06856+K04371+K04427+K11220+K04371+K10160+K06461+K06752+K04729+K03990+K04375+K04734+K04379+K05443+K13376+K13536+K13377+K11217+K11987+K05406+K06483+K13375+K05425+K04730+K06498+K05132+K06752+K06752+K04687+K06752+K06752+K06752+K05697+K08009+K05133+K04448+K06463+K04011+K05430+K06464+K04447+K04383+K04383+K03175+K06856+K10159+K08011+K02580+K08012+K04519+K08010+…
Chagas disease (American trypanosomiasis)	ko05142	108	Manis_javanica_newGene_11255;Manis_javanica_newGene_11333;Manis_javanica_newGene_4536;gene10180;gene10334;gene10398;gene10428;gene10587;gene1095;gene112;gene11283;gene113;gene11411;gene12193;gene12208;gene12258;gene12337;gene12482;gene12518;gene12885;gene12889;gene13079;gene13195;gene13885;gene13891;gene13893;gene14187;gene14333;gene14450;gene14774;gene14851;gene14852;gene15609;gene15761;gene1591…	K04733+K04398+K04390+K04371+K05405+K03916+K10030+K04398+K00922+K01283+K08057+K01283+K07209+K04371+K10160+K04500+K07210+K04630+K04729+K04389+K02373+K05858+K03990+K04734+K05415+K04379+K04630+K05443+K13376+K08041+K04637+K04635+K10161+K13377+K04500+K04633+K03456+K04354+K04382+K04382+K04632+K10030+K00922+K03987+K05406+K12499+K05858+K13375+K05425+K00922+K04730+K03456+K04467+K04354+K04632+K06451+K05132+…
African trypanosomiasis	ko05143	41	Manis_javanica_newGene_10431;Manis_javanica_newGene_10432;Manis_javanica_newGene_1070;Manis_javanica_newGene_3877;Manis_javanica_newGene_4536;Manis_javanica_newGene_8784;Manis_javanica_newGene_9888;gene10334;gene11445;gene12518;gene12885;gene12982;gene13079;gene14333;gene15609;gene18134;gene18135;gene1829;gene18469;gene19784;gene19929;gene21718;gene2210;gene2258;gene23224;gene24989;gene25142;gene…	K06856+K06856+K06856+K06856+K04390+K06856+K06856+K05405+K06241+K04729+K04389+K05482+K05858+K05443+K10161+K13823+K13823+K05406+K05858+K06494+K05425+K04687+K06527+K04234+K02677+K02677+K02677+K06241+K06856+K04390+K04519+K01392+K08757+K05858+K05858+K02677+K04634+K06490+K03156+K00463+K00463
Malaria	ko05144	47	Manis_javanica_newGene_13215;gene10334;gene10428;gene10928;gene10981;gene11728;gene12208;gene12518;gene12982;gene14333;gene14450;gene15020;gene15609;gene15761;gene16548;gene17048;gene17437;gene17745;gene18134;gene18135;gene18202;gene1829;gene18625;gene1973;gene19782;gene19784;gene198;gene20747;gene21718;gene2210;gene22749;gene22851;gene23365;gene23572;gene25392;gene26123;gene2679;gene26985;gene27…	K06728+K05405+K10030+K05718+K05099+K16857+K10160+K04729+K05482+K05443+K13376+K06257+K10161+K13377+K06576+K04659+K10030+K04659+K13823+K13823+K04659+K05406+K06259+K13375+K06496+K06494+K06728+K03161+K04687+K06527+K05423+K06508+K04550+K06543+K04011+K06464+K04659+K14624+K06471+K10159+K03160+K04519+K06574+K16336+K06490+K03156+K05460
Toxoplasmosis	ko05145	127	Manis_javanica_newGene_11255;Manis_javanica_newGene_11333;Manis_javanica_newGene_12241;Manis_javanica_newGene_13562;Manis_javanica_newGene_13679;gene10180;gene10587;gene10802;gene10821;gene10840;gene1095;gene11411;gene11427;gene11445;gene11666;gene12003;gene12161;gene12193;gene12208;gene12216;gene12337;gene12370;gene12482;gene12499;gene12518;gene13107;gene13885;gene14187;gene14333;gene14450;gene1…	K04733+K04398+K06485+K06244+K04399+K04371+K04398+K04427+K16061+K06240+K00922+K07209+K06276+K06241+K11220+K05637+K04180+K04371+K10160+K00461+K07210+K05400+K04630+K06752+K04729+K06240+K04734+K04630+K05443+K13376+K06245+K05636+K13377+K04433+K08060+K04694+K06485+K11217+K05637+K00922+K05406+K04399+K02158+K06247+K13375+K05425+K00922+K05135+K04730+K04467+K06244+K06246+K05635+K03161+K05636+K05132+K06752+…
Amoebiasis	ko05146	129	Manis_javanica_newGene_10431;Manis_javanica_newGene_10432;Manis_javanica_newGene_1070;Manis_javanica_newGene_13562;Manis_javanica_newGene_3877;Manis_javanica_newGene_8784;Manis_javanica_newGene_9656;Manis_javanica_newGene_9888;gene10134;gene10334;gene10428;gene10465;gene10840;gene1095;gene11143;gene11445;gene12003;gene12208;gene12222;gene1242;gene12637;gene12756;gene12773;gene12792;gene13079;gene…	K06856+K06856+K06856+K06244+K06856+K06856+K03997+K06856+K06236+K05405+K10030+K05700+K06240+K00922+K05699+K06241+K05637+K10160+K06461+K01476+K01476+K13963+K06237+K05699+K05858+K06240+K03997+K03998+K06236+K05443+K13376+K04000+K08041+K04345+K04637+K04635+K07897+K06245+K05636+K13377+K04387+K04386+K04633+K06237+K04632+K05637+K10030+K00922+K03999+K05717+K05699+K05406+K05858+K06247+K04345+K04345+K13375+…
Staphylococcus aureus infection	ko05150	54	Manis_javanica_newGene_10431;Manis_javanica_newGene_10432;Manis_javanica_newGene_1070;Manis_javanica_newGene_11250;Manis_javanica_newGene_13656;Manis_javanica_newGene_3877;Manis_javanica_newGene_8784;Manis_javanica_newGene_9888;gene10552;gene10928;gene10939;gene11219;gene1178;gene12222;gene12499;gene13195;gene13298;gene13508;gene14333;gene14416;gene1593;gene18223;gene19782;gene20637;gene20996;gen…	K06856+K06856+K06856+K04004+K07604+K06856+K06856+K06856+K04010+K05718+K04279+K04004+K03992+K06461+K06752+K03990+K03993+K03991+K05443+K01315+K03905+K03987+K06496+K06498+K06752+K06752+K06752+K06752+K06752+K01330+K01331+K04173+K03991+K03991+K06463+K12560+K06464+K12560+K06856+K03994+K03994+K04009+K06544+K01332+K01335+K03989+K03993+K01334+K06752+K06752+K06752+K06490+K01333+K07596
Tuberculosis	ko05152	184	Manis_javanica_newGene_10431;Manis_javanica_newGene_10432;Manis_javanica_newGene_10444;Manis_javanica_newGene_1070;Manis_javanica_newGene_11255;Manis_javanica_newGene_11333;Manis_javanica_newGene_13679;Manis_javanica_newGene_3877;Manis_javanica_newGene_7716;Manis_javanica_newGene_8784;Manis_javanica_newGene_9888;gene10180;gene10334;gene10370;gene10412;gene10454;gene10463;gene10587;gene11429;gene1…	K06856+K06856+K02183+K06856+K04733+K04398+K04399+K06856+K05870+K06856+K06856+K04371+K05405+K04718+K06528+K04348+K04515+K04398+K02155+K11220+K02144+K02159+K04371+K10160+K06461+K03662+K04515+K06752+K04729+K02373+K04077+K05482+K05704+K03990+K14958+K08066+K05426+K05415+K07368+K13916+K06563+K04515+K05443+K07369+K04348+K13376+K06462+K12478+K02146+K01368+K07897+K06528+K10161+K03661+K13377+K04400+K02183+…
Hepatitis C	ko05160	131	Manis_javanica_newGene_10293;Manis_javanica_newGene_10768;Manis_javanica_newGene_883;Manis_javanica_newGene_9386;Manis_javanica_newGene_9388;gene10180;gene10269;gene10428;gene1095;gene10964;gene11187;gene1138;gene11411;gene11427;gene11666;gene11897;gene12177;gene12193;gene12337;gene12630;gene13073;gene13608;gene13885;gene13891;gene13963;gene1454;gene15459;gene16752;gene16833;gene17015;gene17022;g…	K05130+K14216+K06087+K14216+K14216+K04371+K08845+K10030+K00922+K06087+K08524+K12646+K07209+K06276+K11220+K05411+K04364+K04371+K07210+K03237+K16196+K11221+K04734+K05415+K06087+K16194+K04451+K03456+K04354+K04382+K11217+K04382+K04361+K10030+K06087+K00922+K03174+K04706+K07294+K03173+K06087+K02158+K04696+K04357+K06087+K02833+K09447+K04364+K00922+K05131+K03456+K04467+K04354+K08860+K06087+K02649+K06088+…
Hepatitis B	ko05161	158	Manis_javanica_newGene_10293;Manis_javanica_newGene_11333;Manis_javanica_newGene_13679;Manis_javanica_newGene_13893;Manis_javanica_newGene_4536;Manis_javanica_newGene_7716;gene10103;gene10180;gene10334;gene10361;gene10428;gene10587;gene1062;gene1095;gene1138;gene11411;gene11415;gene11529;gene11583;gene11664;gene11666;gene11678;gene11861;gene11897;gene12177;gene12193;gene12208;gene12327;gene12337;…	K05130+K04398+K04399+K17332+K04390+K05870+K04802+K04371+K05405+K16197+K10030+K04398+K04377+K00922+K12646+K07209+K15041+K16344+K17332+K11222+K11220+K06627+K02159+K05411+K04364+K04371+K10160+K03662+K07210+K04729+K17454+K06620+K09389+K04389+K02373+K05704+K04375+K09048+K11221+K04734+K05415+K04379+K17333+K13376+K04451+K09048+K13377+K04400+K06627+K09047+K05870+K11217+K10030+K00922+K02084+K09048+K04450+…
Measles	ko05162	138	Manis_javanica_newGene_10293;Manis_javanica_newGene_10431;Manis_javanica_newGene_10432;Manis_javanica_newGene_1070;Manis_javanica_newGene_10768;Manis_javanica_newGene_11255;Manis_javanica_newGene_3877;Manis_javanica_newGene_4536;Manis_javanica_newGene_8784;Manis_javanica_newGene_9386;Manis_javanica_newGene_9388;Manis_javanica_newGene_9888;gene10259;gene10334;gene10555;gene10802;gene10931;gene1095…	K05130+K06856+K06856+K06856+K14216+K04733+K06856+K04390+K06856+K14216+K14216+K06856+K10144+K05405+K10132+K04427+K11859+K00922+K12646+K11220+K05411+K03097+K10160+K04729+K03237+K04389+K06536+K16196+K07899+K11221+K14752+K04734+K05415+K06563+K16194+K05070+K10151+K04451+K10161+K10152+K11217+K03097+K00922+K07900+K05406+K06470+K09447+K05425+K00922+K05131+K04730+K04467+K08860+K06451+K05132+K06450+K06452+…
Influenza A	ko05164	166	Manis_javanica_newGene_10293;Manis_javanica_newGene_10768;Manis_javanica_newGene_11255;Manis_javanica_newGene_13679;Manis_javanica_newGene_4536;Manis_javanica_newGene_884;Manis_javanica_newGene_9386;Manis_javanica_newGene_9388;gene10180;gene10334;gene10428;gene10941;gene1095;gene11070;gene1113;gene1138;gene11411;gene11537;gene11588;gene11600;gene11666;gene11897;gene12193;gene12208;gene12219;gene1…	K05130+K14216+K04733+K04399+K04390+K09523+K14216+K14216+K04371+K05405+K10030+K01312+K00922+K05692+K14297+K12646+K07209+K12967+K14297+K14396+K11220+K05411+K04371+K10160+K12799+K06752+K04729+K03237+K04389+K09643+K12671+K05482+K16196+K11221+K04734+K05415+K14290+K01315+K14404+K16194+K01312+K10652+K04433+K14285+K12800+K08060+K15042+K11217+K10030+K00922+K00787+K04450+K05406+K04399+K12499+K04696+K15046+…
HTLV-I infection	ko05166	277	Manis_javanica_newGene_12746;Manis_javanica_newGene_13893;Manis_javanica_newGene_5895;Manis_javanica_newGene_7716;Manis_javanica_newGene_781;gene10103;gene10334;gene10454;gene10511;gene10512;gene10577;gene10614;gene1062;gene10632;gene10797;gene10928;gene1095;gene11283;gene11336;gene11346;gene11411;gene11412;gene11415;gene11554;gene11583;gene117;gene11861;gene11895;gene12078;gene12203;gene12258;ge…	K02537+K17332+K09253+K05870+K06621+K04802+K05405+K04348+K01064+K00312+K09421+K09341+K04377+K00182+K09053+K05718+K00922+K08057+K02842+K06751+K07209+K02330+K15041+K03353+K17332+K04421+K02159+K07829+K03354+K02328+K04500+K07210+K06752+K02216+K17454+K06620+K08054+K02353+K09389+K06637+K08042+K03504+K04375+K04734+K04379+K17333+K06635+K14290+K04348+K08874+K13376+K00444+K05070+K08041+K04345+K02235+K09253+…
Herpes simplex infection	ko05168	189	Manis_javanica_newGene_10293;Manis_javanica_newGene_10342;Manis_javanica_newGene_10768;Manis_javanica_newGene_11299;Manis_javanica_newGene_11333;Manis_javanica_newGene_13437;Manis_javanica_newGene_4536;Manis_javanica_newGene_9386;Manis_javanica_newGene_9388;gene10236;gene10334;gene10384;gene10582;gene10587;gene10629;gene10802;gene11346;gene1138;gene11411;gene11666;gene11897;gene11993;gene12088;ge…	K05130+K15409+K14216+K12890+K04398+K15409+K04390+K14216+K14216+K02223+K05405+K12891+K12893+K04398+K11838+K04427+K06751+K12646+K07209+K11220+K05411+K03097+K06269+K07210+K06752+K04729+K03237+K04389+K02373+K16196+K05477+K03990+K15412+K11221+K02296+K04734+K05415+K04379+K03120+K12890+K15410+K12893+K16194+K03133+K02296+K06531+K04451+K10161+K05653+K04440+K02223+K07293+K11217+K03094+K03097+K12896+K06505+…
Epstein-Barr virus infection	ko05169	208	Manis_javanica_newGene_10431;Manis_javanica_newGene_10432;Manis_javanica_newGene_1070;Manis_javanica_newGene_10963;Manis_javanica_newGene_2248;Manis_javanica_newGene_3877;Manis_javanica_newGene_5675;Manis_javanica_newGene_5895;Manis_javanica_newGene_6464;Manis_javanica_newGene_7419;Manis_javanica_newGene_8784;Manis_javanica_newGene_9351;Manis_javanica_newGene_9878;Manis_javanica_newGene_9888;gene…	K06856+K06856+K06856+K06067+K05854+K06856+K01242+K09253+K14317+K10881+K06856+K03137+K03137+K06856+K16197+K11406+K04377+K11838+K04427+K03030+K05718+K11859+K00922+K03022+K06751+K12646+K07209+K03016+K06627+K05411+K03024+K03023+K03097+K05859+K03066+K07210+K15979+K16196+K10591+K03019+K04734+K03010+K07606+K03063+K06468+K14290+K05443+K03038+K16194+K04345+K03029+K09253+K04012+K04451+K03062+K06477+K06627+…
Pathways in cancer	ko05200	444	Manis_javanica_newGene_10046;Manis_javanica_newGene_10963;Manis_javanica_newGene_11333;Manis_javanica_newGene_12241;Manis_javanica_newGene_12637;Manis_javanica_newGene_13562;Manis_javanica_newGene_13679;Manis_javanica_newGene_4227;Manis_javanica_newGene_4536;Manis_javanica_newGene_5537;Manis_javanica_newGene_6619;Manis_javanica_newGene_6686;Manis_javanica_newGene_7268;Manis_javanica_newGene_7420;…	K09592+K06067+K04398+K06485+K08803+K06244+K04399+K06619+K04390+K04346+K04491+K10031+K08803+K04538+K06621+K04548+K04546+K04371+K08845+K05405+K03916+K10030+K01064+K00312+K08878+K04398+K04377+K00182+K09291+K16061+K06240+K16859+K00922+K09293+K05099+K08524+K10056+K04347+K02842+K07209+K06241+K07835+K11220+K04358+K02159+K05454+K05637+K05859+K04364+K04371+K04500+K05061+K07210+K04630+K04504+K17454+K06620+…
Transcriptional misregulation in cancer	ko05202	182	Manis_javanica_newGene_10431;Manis_javanica_newGene_10432;Manis_javanica_newGene_1070;Manis_javanica_newGene_10963;Manis_javanica_newGene_12396;Manis_javanica_newGene_3877;Manis_javanica_newGene_6276;Manis_javanica_newGene_8784;Manis_javanica_newGene_9825;Manis_javanica_newGene_9888;gene10334;gene10428;gene10464;gene1062;gene10797;gene10952;gene10981;gene11119;gene11187;gene11213;gene11278;gene11…	K06856+K06856+K06856+K06067+K15620+K06856+K11447+K06856+K15188+K06856+K05405+K10030+K01348+K04377+K09053+K09293+K05099+K08559+K08524+K10056+K15604+K08821+K00717+K10051+K11253+K11253+K10500+K13098+K06461+K11449+K05087+K05087+K10055+K13209+K08526+K15620+K10138+K09278+K11313+K10151+K04650+K06590+K08821+K04451+K04387+K06622+K14242+K01558+K11313+K11253+K05413+K15617+K15187+K10030+K01343+K04453+K15613+…
Viral carcinogenesis	ko05203	216	Manis_javanica_newGene_10963;Manis_javanica_newGene_11333;Manis_javanica_newGene_13732;Manis_javanica_newGene_2248;Manis_javanica_newGene_4644;Manis_javanica_newGene_7716;Manis_javanica_newGene_781;Manis_javanica_newGene_9351;Manis_javanica_newGene_9791;Manis_javanica_newGene_9878;gene10180;gene10323;gene10361;gene10414;gene10587;gene10629;gene10636;gene1095;gene11143;gene11346;gene11412;gene1141…	K06067+K04398+K16332+K05854+K04681+K05870+K06621+K03137+K06638+K03137+K04371+K11405+K16197+K11406+K04398+K11838+K08665+K00922+K05699+K06751+K02330+K15041+K06627+K11252+K11252+K11252+K11252+K02159+K05411+K04180+K04364+K04371+K11252+K07210+K04178+K15979+K03123+K02216+K05699+K05704+K03143+K03990+K09048+K03122+K04734+K14021+K04443+K06638+K04345+K05768+K02146+K10151+K11407+K08053+K04451+K03062+K09048+…
Chemical carcinogenesis	ko05204	86	Manis_javanica_newGene_10845;Manis_javanica_newGene_11470;Manis_javanica_newGene_11472;Manis_javanica_newGene_11641;Manis_javanica_newGene_11645;Manis_javanica_newGene_12373;Manis_javanica_newGene_12604;Manis_javanica_newGene_12624;Manis_javanica_newGene_13460;Manis_javanica_newGene_13627;Manis_javanica_newGene_13649;Manis_javanica_newGene_13973;Manis_javanica_newGene_2353;Manis_javanica_newGene_…	K00699+K07424+K07424+K07424+K07424+K07409+K00079+K00079+K00699+K00799+K07424+K00799+K00799+K00699+K00079+K00699+K07424+K00079+K00699+K00799+K00799+K00622+K00799+K13980+K00121+K00799+K00799+K00799+K00799+K13299+K00079+K17685+K17685+K07412+K00129+K00799+K00799+K00079+K00079+K01253+K11987+K01014+K00699+K00079+K09097+K00699+K00699+K00799+K00121+K07413+K07424+K13951+K04809+K07413+K00699+K00699+K00799+…
Proteoglycans in cancer	ko05205	230	Manis_javanica_newGene_4536;Manis_javanica_newGene_695;Manis_javanica_newGene_7609;gene10180;gene10269;gene10274;gene10463;gene10464;gene10511;gene10512;gene1062;gene10632;gene1095;gene10981;gene10982;gene10983;gene11070;gene11336;gene11427;gene11728;gene11895;gene11969;gene12015;gene12088;gene12177;gene12193;gene12208;gene12296;gene12389;gene12390;gene12422;gene12553;gene12648;gene12843;gene1288…	K04390+K09069+K01365+K04371+K08845+K01365+K04515+K01348+K01064+K00312+K04377+K00182+K00922+K05099+K06278+K12958+K05692+K02842+K06276+K16857+K07829+K02991+K05859+K06269+K04364+K04371+K10160+K05098+K10380+K04515+K05085+K06493+K04688+K08109+K04389+K05704+K12959+K04375+K05087+K04514+K05087+K13769+K04515+K04960+K03258+K04362+K13376+K00444+K08268+K04959+K04345+K02235+K06257+K16848+K04707+K00572+K01365+…
MicroRNAs in cancer	ko05206	156	Manis_javanica_newGene_4227;Manis_javanica_newGene_7031;Manis_javanica_newGene_781;gene10168;gene10464;gene10474;gene10512;gene1062;gene10981;gene11411;gene11601;gene11667;gene11728;gene12015;gene12177;gene12192;gene12294;gene12403;gene12505;gene12545;gene12553;gene12595;gene12622;gene12735;gene12809;gene13075;gene13390;gene13721;gene13970;gene13999;gene140;gene14154;gene14197;gene14257;gene14450…	K06619+K04671+K06621+K10373+K01348+K04381+K00312+K04377+K05099+K07209+K02163+K01425+K16857+K05859+K04364+K05658+K07204+K05665+K06252+K04445+K06493+K17454+K06620+K10145+K09389+K17460+K04514+K17449+K07606+K06645+K17461+K01425+K09850+K14021+K13376+K07187+K02539+K10151+K04451+K02085+K09299+K04694+K02329+K11987+K04361+K18050+K09295+K02085+K05762+K05448+K01116+K06279+K15379+K11411+K06619+K06256+K06484+…
Colorectal cancer	ko05210	71	Manis_javanica_newGene_13679;Manis_javanica_newGene_6619;gene10180;gene10269;gene1062;gene1095;gene11861;gene12193;gene12258;gene13893;gene14450;gene15459;gene15761;gene15898;gene15916;gene15954;gene16656;gene16915;gene16942;gene17105;gene17530;gene17532;gene1787;gene18401;gene18470;gene18485;gene18668;gene18949;gene19006;gene1973;gene19936;gene21032;gene21309;gene21646;gene21908;gene22510;gene22…	K04399+K04491+K04371+K08845+K04377+K00922+K02159+K04371+K04500+K04379+K13376+K04451+K13377+K02085+K04500+K06765+K04492+K08734+K04490+K02620+K08736+K00922+K02085+K04399+K02158+K04392+K08731+K02157+K04491+K13375+K00922+K04513+K02649+K06765+K02085+K04440+K04399+K02161+K02105+K04440+K03083+K04448+K02157+K08736+K04365+K08732+K04503+K02187+K00922+K02649+K04456+K06765+K04388+K08735+K04368+K04385+K02649+…
Renal cell carcinoma	ko05211	72	Manis_javanica_newGene_10046;gene10180;gene10269;gene1095;gene10981;gene12177;gene12193;gene1444;gene14450;gene1447;gene15761;gene16745;gene17403;gene17532;gene17690;gene17767;gene17976;gene18057;gene18268;gene18485;gene19093;gene19424;gene1973;gene19744;gene19765;gene19936;gene20072;gene20569;gene20995;gene21309;gene21970;gene22489;gene22654;gene23206;gene24271;gene24416;gene24481;gene25197;gene…	K09592+K04371+K08845+K00922+K05099+K04364+K04371+K03870+K13376+K08268+K13377+K07293+K09095+K00922+K07299+K06277+K04410+K05448+K07836+K04392+K09097+K02833+K13375+K04438+K04364+K00922+K09593+K05733+K07293+K02649+K04409+K04498+K04369+K03099+K04448+K01679+K04409+K04365+K09592+K08774+K03873+K15589+K05736+K04364+K00922+K02649+K04456+K04410+K04393+K09594+K03099+K04368+K02649+K07293+K03870+K04456+K05736+…
Pancreatic cancer	ko05212	69	Manis_javanica_newGene_13679;Manis_javanica_newGene_781;gene10180;gene10269;gene1095;gene11411;gene11640;gene11666;gene12193;gene12258;gene12337;gene12595;gene12622;gene12809;gene14450;gene15459;gene15748;gene15761;gene15916;gene17022;gene17145;gene17302;gene17532;gene18057;gene18401;gene18470;gene18485;gene18915;gene1973;gene19936;gene20282;gene2066;gene20748;gene21309;gene215;gene22510;gene2265…	K04399+K06621+K04371+K08845+K00922+K07209+K07835+K11220+K04371+K04500+K07210+K17454+K06620+K09389+K13376+K04451+K08773+K13377+K04500+K11217+K08775+K04361+K00922+K05448+K04399+K02158+K04392+K04357+K13375+K00922+K04467+K06618+K05729+K02649+K02089+K04440+K04399+K04440+K04692+K05083+K04365+K08774+K08732+K04503+K08775+K04482+K00922+K02649+K04456+K06618+K04393+K02580+K04388+K04368+K02091+K02649+K07860+…
Endometrial cancer	ko05213	61	Manis_javanica_newGene_13679;Manis_javanica_newGene_6619;gene10180;gene10269;gene1062;gene1095;gene11427;gene12177;gene12193;gene12835;gene13287;gene15459;gene15898;gene16058;gene16223;gene16656;gene16915;gene16942;gene17105;gene17302;gene17532;gene1787;gene18401;gene18470;gene18915;gene18949;gene19006;gene19424;gene19765;gene19936;gene21309;gene21908;gene21927;gene22654;gene22655;gene2282;gene23…	K04399+K04491+K04371+K08845+K04377+K00922+K06276+K04364+K04371+K05691+K04375+K04451+K02085+K05689+K05691+K04492+K08734+K04490+K02620+K04361+K00922+K02085+K04399+K02158+K04357+K02157+K04491+K02833+K04364+K00922+K02649+K02085+K06272+K04369+K04399+K02105+K03099+K05691+K03083+K09408+K02157+K05083+K04365+K04503+K04364+K00922+K02649+K04456+K05691+K03099+K04368+K04385+K02649+K04456+K04366+K05691+K02649+…
Glioma	ko05214	73	Manis_javanica_newGene_10444;Manis_javanica_newGene_781;gene10180;gene10269;gene10463;gene1095;gene12015;gene12177;gene12193;gene12390;gene12595;gene12622;gene12809;gene13291;gene1340;gene13721;gene14155;gene15459;gene16024;gene16514;gene17159;gene17302;gene17532;gene18170;gene18185;gene18915;gene1928;gene19424;gene19765;gene19936;gene2066;gene21309;gene21440;gene215;gene22654;gene22972;gene22975…	K02183+K06621+K04371+K08845+K04515+K00922+K05859+K04364+K04371+K04515+K17454+K06620+K09389+K05087+K05087+K17449+K04515+K04451+K17448+K02183+K02183+K04361+K00922+K01116+K06279+K04357+K05459+K02833+K04364+K00922+K06618+K02649+K02183+K02089+K04369+K05089+K04515+K03099+K02677+K04363+K02183+K06625+K02183+K02677+K02677+K04365+K08774+K04503+K04364+K00922+K02649+K04456+K07203+K06618+K17447+K17447+K03099+…
Prostate cancer	ko05215	100	Manis_javanica_newGene_13679;Manis_javanica_newGene_6619;Manis_javanica_newGene_7716;gene10180;gene10269;gene1095;gene11411;gene11427;gene12177;gene12193;gene12337;gene12595;gene12622;gene12809;gene13291;gene13342;gene1340;gene13885;gene13967;gene14360;gene15287;gene15423;gene15459;gene157;gene16233;gene16615;gene16656;gene16942;gene17105;gene17302;gene17532;gene17773;gene18069;gene18401;gene1847…	K04399+K04491+K05870+K04371+K08845+K00922+K07209+K06276+K04364+K04371+K07210+K17454+K06620+K09389+K05087+K09048+K05087+K04734+K04526+K04362+K12344+K08557+K04451+K09048+K09047+K05870+K04492+K04490+K02620+K04361+K00922+K09048+K04079+K04399+K02158+K04357+K04491+K09048+K05459+K02833+K04364+K00922+K04467+K07201+K06618+K05086+K02649+K04498+K09048+K04369+K04399+K02161+K06626+K02105+K05089+K03099+K04363+…
Thyroid cancer	ko05216	30	Manis_javanica_newGene_6619;gene10180;gene1062;gene10714;gene10952;gene11187;gene12193;gene14059;gene15459;gene16058;gene16656;gene16942;gene17105;gene18300;gene19006;gene19424;gene21080;gene22654;gene2282;gene24405;gene25197;gene25804;gene4440;gene4699;gene4865;gene598;gene600;gene6427;gene790;gene9811;	K04491+K04371+K04377+K09291+K09293+K08524+K04371+K08526+K04451+K05689+K04492+K04490+K02620+K09288+K04491+K02833+K03176+K04369+K02105+K09292+K04365+K04503+K04368+K09289+K05126+K09290+K09290+K08530+K08525+K07828
Basal cell carcinoma	ko05217	58	Manis_javanica_newGene_6619;gene10511;gene10512;gene10632;gene11336;gene12696;gene14466;gene14916;gene15108;gene15135;gene15382;gene15459;gene15898;gene1637;gene1653;gene16656;gene16825;gene16942;gene17068;gene17105;gene17707;gene1787;gene1813;gene18558;gene18949;gene18980;gene19006;gene1948;gene1949;gene20287;gene20561;gene20652;gene20962;gene21180;gene21908;gene21983;gene2282;gene23557;gene2382…	K04491+K01064+K00312+K00182+K02842+K02353+K00444+K02235+K04662+K06231+K00572+K04451+K02085+K01558+K11988+K04492+K01384+K04490+K02329+K02620+K00572+K02085+K02353+K04662+K02157+K06230+K04491+K01357+K03209+K00714+K06226+K16797+K00714+K06225+K02085+K02432+K02105+K02432+K01064+K00312+K03083+K02376+K16798+K11101+K02157+K06228+K00445+K01357+K00408+K04385+K00182+K02354+K02353+K06229+K02375+K00444+K02842+…
Melanoma	ko05218	69	Manis_javanica_newGene_781;gene10180;gene10269;gene1095;gene10981;gene11852;gene12193;gene12595;gene12622;gene12809;gene13291;gene1340;gene13807;gene14360;gene14378;gene15459;gene15855;gene16058;gene16958;gene17302;gene17474;gene17532;gene17948;gene18470;gene18915;gene1928;gene19424;gene19936;gene2066;gene21309;gene215;gene21685;gene22654;gene22972;gene23294;gene23446;gene24074;gene25197;gene2580…	K06621+K04371+K08845+K00922+K05099+K04358+K04371+K17454+K06620+K09389+K05087+K05087+K04358+K04362+K09455+K04451+K04358+K05689+K04358+K04361+K04358+K00922+K04358+K02158+K04357+K05459+K02833+K00922+K06618+K02649+K02089+K04358+K04369+K05089+K04363+K06625+K04358+K04365+K04503+K05450+K04358+K00922+K02649+K04456+K18496+K04358+K04358+K06618+K04368+K02091+K02649+K04358+K04358+K05450+K04456+K04366+K06643+…
Bladder cancer	ko05219	42	Manis_javanica_newGene_12637;Manis_javanica_newGene_7268;Manis_javanica_newGene_781;gene10180;gene10269;gene10428;gene1062;gene11728;gene12193;gene12545;gene12595;gene12622;gene12809;gene14197;gene15459;gene16058;gene17302;gene17437;gene18057;gene18915;gene19424;gene2066;gene215;gene21628;gene22654;gene23020;gene2313;gene23446;gene24714;gene2514;gene25197;gene25804;gene26166;gene26266;gene3820;ge…	K08803+K08803+K06621+K04371+K08845+K10030+K04377+K16857+K04371+K04445+K17454+K06620+K09389+K09850+K04451+K05689+K04361+K10030+K05448+K04357+K02833+K06618+K02089+K05094+K04369+K01388+K01398+K06625+K08803+K05083+K04365+K04503+K08803+K08803+K06618+K04368+K08803+K01403+K04366+K06643+K04361+K07828
Chronic myeloid leukemia	ko05220	81	Manis_javanica_newGene_10963;Manis_javanica_newGene_4227;Manis_javanica_newGene_781;gene10180;gene10269;gene10563;gene1062;gene1095;gene11411;gene12177;gene12193;gene12337;gene12595;gene12622;gene12809;gene13721;gene13885;gene14450;gene15147;gene15459;gene15761;gene15857;gene16024;gene16745;gene17532;gene18185;gene18309;gene18470;gene18560;gene19030;gene19424;gene1973;gene19744;gene19765;gene1993…	K06067+K06619+K06621+K04371+K08845+K08878+K04377+K00922+K07209+K04364+K04371+K07210+K17454+K06620+K09389+K17449+K04734+K13376+K04707+K04451+K13377+K04462+K17448+K07293+K00922+K06279+K06067+K02158+K06067+K06619+K02833+K13375+K04438+K04364+K00922+K04707+K04467+K06618+K07293+K02649+K02089+K08367+K04369+K03099+K06625+K11223+K04496+K04365+K11224+K04503+K04364+K00922+K02649+K04456+K06618+K06624+K02580+…
Acute myeloid leukemia	ko05221	60	Manis_javanica_newGene_6619;gene10180;gene10269;gene1062;gene1095;gene11213;gene11411;gene12177;gene12193;gene12337;gene1253;gene12648;gene13518;gene15253;gene16656;gene16942;gene17105;gene17532;gene18355;gene18470;gene19006;gene19424;gene19560;gene19765;gene19885;gene19936;gene20282;gene21309;gene21465;gene22016;gene22425;gene22654;gene23206;gene23584;gene23585;gene25197;gene25665;gene25804;gene…	K04491+K04371+K08845+K04377+K00922+K10056+K07209+K04364+K04371+K07210+K04504+K04688+K10055+K08806+K04492+K04490+K02620+K00922+K05092+K02158+K04491+K02833+K10053+K04364+K07205+K00922+K04467+K02649+K09438+K09055+K08367+K04369+K03099+K11223+K04692+K04365+K11224+K04503+K04364+K04688+K00922+K02649+K04456+K10054+K07203+K02580+K03099+K05091+K04368+K08527+K02649+K04688+K04456+K04366+K04702+K02649+K04735+…
Small cell lung cancer	ko05222	108	Manis_javanica_newGene_12241;Manis_javanica_newGene_13562;Manis_javanica_newGene_13679;Manis_javanica_newGene_175;gene1062;gene10821;gene10840;gene1095;gene11187;gene11411;gene11445;gene12003;gene12337;gene12595;gene12622;gene12722;gene12773;gene12809;gene13107;gene13885;gene14059;gene15459;gene15738;gene15739;gene16641;gene17121;gene17232;gene17412;gene17532;gene17567;gene17721;gene17785;gene178…	K06485+K06244+K04399+K01522+K04377+K16061+K06240+K00922+K08524+K07209+K06241+K05637+K07210+K17454+K06620+K16063+K06237+K09389+K06240+K04734+K08526+K04451+K06245+K05636+K06485+K06237+K11987+K05637+K00922+K03174+K02084+K03173+K04453+K05717+K02219+K04399+K01522+K06247+K08528+K00922+K09848+K04467+K06244+K06618+K06476+K06246+K05635+K05636+K06243+K02649+K02089+K04685+K04399+K06482+K02161+K06626+K09849+…
Non-small cell lung cancer	ko05223	63	Manis_javanica_newGene_13679;Manis_javanica_newGene_175;Manis_javanica_newGene_781;gene10180;gene10269;gene1095;gene11187;gene11427;gene12015;gene12177;gene12193;gene12595;gene12622;gene12809;gene14059;gene14197;gene15459;gene17302;gene17532;gene18170;gene18401;gene18450;gene18470;gene18915;gene19424;gene19478;gene19576;gene19765;gene19936;gene2066;gene21309;gene215;gene22654;gene22655;gene23206;…	K04399+K01522+K06621+K04371+K08845+K00922+K08524+K06276+K05859+K04364+K04371+K17454+K06620+K09389+K08526+K09850+K04451+K04361+K00922+K01116+K04399+K01522+K02158+K04357+K02833+K05119+K08528+K04364+K00922+K06618+K02649+K02089+K04369+K04399+K03099+K02677+K09408+K02677+K05083+K02677+K04365+K08774+K04503+K04364+K08015+K00922+K02649+K04456+K06618+K03099+K04368+K02091+K02649+K04456+K04366+K02677+K08525+…
Central carbon metabolism in cancer	ko05230	72	Manis_javanica_newGene_5972;gene10180;gene1044;gene1062;gene1095;gene10981;gene1145;gene11667;gene1175;gene12193;gene12336;gene13533;gene13573;gene14154;gene14316;gene14360;gene1447;gene14509;gene15459;gene16289;gene16290;gene17152;gene17249;gene17302;gene1742;gene17532;gene17690;gene18355;gene19424;gene19936;gene20167;gene21080;gene21309;gene21628;gene22133;gene22473;gene22650;gene22654;gene2297…	K00161+K04371+K01834+K04377+K00922+K05099+K00161+K01425+K00161+K04371+K00036+K05101+K00844+K01425+K00850+K04362+K08268+K00850+K04451+K05616+K05616+K05616+K01834+K04361+K13780+K00922+K07299+K05092+K02833+K00922+K05616+K03176+K02649+K05094+K08180+K11413+K11416+K04369+K05089+K00850+K04363+K00844+K05083+K00850+K00844+K05616+K00922+K02649+K04456+K07203+K14634+K12077+K05091+K01425+K04368+K02649+K05126+…
Choline metabolism in cancer	ko05231	109	Manis_javanica_newGene_6056;gene10180;gene1066;gene1095;gene11427;gene11715;gene11778;gene12177;gene12193;gene12349;gene12648;gene1270;gene12754;gene1378;gene13893;gene14136;gene14417;gene1447;gene14618;gene14873;gene15398;gene15864;gene1614;gene16869;gene17141;gene17302;gene17532;gene17772;gene18170;gene18418;gene18485;gene18736;gene18915;gene19219;gene19424;gene19514;gene19765;gene19885;gene199…	K00901+K04371+K14387+K00922+K06276+K15282+K00994+K04364+K04371+K15377+K04688+K16342+K05753+K00968+K04379+K06128+K08200+K08268+K01115+K00889+K01115+K06515+K05748+K14156+K01115+K04361+K00922+K00901+K01116+K00901+K04392+K14156+K04357+K05747+K02833+K15377+K04364+K07205+K00922+K08198+K08199+K16342+K07207+K00901+K02649+K15377+K00968+K05747+K01080+K04440+K04369+K00901+K05089+K16342+K16342+K16342+K04440+…
Asthma	ko05310	31	Manis_javanica_newGene_10431;Manis_javanica_newGene_10432;Manis_javanica_newGene_1070;Manis_javanica_newGene_3877;Manis_javanica_newGene_8784;Manis_javanica_newGene_9888;gene12499;gene12568;gene14333;gene15258;gene16153;gene19089;gene20478;gene20747;gene20996;gene20997;gene21887;gene21888;gene21889;gene23891;gene2567;gene2568;gene302;gene3611;gene5076;gene5109;gene792;gene794;gene796;gene8990;gen…	K06856+K06856+K06856+K06856+K06856+K06856+K06752+K08090+K05443+K05428+K08089+K07983+K10786+K03161+K06752+K06752+K06752+K06752+K06752+K16597+K05430+K05435+K06856+K05432+K04736+K03160+K06752+K06752+K06752+K10788+K03156
Autoimmune thyroid disease	ko05320	48	Manis_javanica_newGene_10431;Manis_javanica_newGene_10432;Manis_javanica_newGene_1070;Manis_javanica_newGene_3877;Manis_javanica_newGene_4536;Manis_javanica_newGene_8784;Manis_javanica_newGene_9888;gene11346;gene12499;gene12885;gene14010;gene14333;gene15258;gene16645;gene1685;gene18786;gene19413;gene19414;gene20708;gene20747;gene20996;gene20997;gene21317;gene21887;gene21888;gene21889;gene22401;ge…	K06856+K06856+K06856+K06856+K04390+K06856+K06856+K06751+K06752+K04389+K04249+K05443+K05428+K08522+K05413+K04249+K06470+K06538+K00431+K03161+K06752+K06752+K05429+K06752+K06752+K06752+K04249+K10809+K05414+K05430+K06751+K06751+K10809+K06856+K06751+K06751+K06751+K05412+K01353+K04390+K03160+K06752+K06752+K06752+K05414+K05414+K07818+K05251
Inflammatory bowel disease (IBD)	ko05321	60	gene10334;gene11664;gene11666;gene12208;gene12258;gene12499;gene12982;gene13607;gene14333;gene14450;gene14599;gene15215;gene15258;gene15414;gene15761;gene15916;gene16014;gene16015;gene16249;gene16250;gene17557;gene1829;gene19375;gene1973;gene19929;gene20945;gene20996;gene20997;gene21311;gene21317;gene21318;gene21718;gene21887;gene21888;gene21889;gene23366;gene23477;gene23525;gene23585;gene24043;g…	K05405+K11222+K11220+K10160+K04500+K06752+K05482+K05426+K05443+K13376+K05070+K05494+K05428+K10163+K13377+K04500+K05064+K05065+K05071+K05075+K05445+K05406+K10165+K13375+K05425+K05132+K06752+K06752+K05063+K05429+K05434+K04687+K06752+K06752+K06752+K11225+K04446+K05133+K04692+K05063+K04448+K05430+K05435+K04383+K04383+K10159+K05489+K02580+K09035+K05174+K05173+K04519+K06752+K06752+K06752+K10166+K08532+…
Systemic lupus erythematosus	ko05322	97	Manis_javanica_newGene_10431;Manis_javanica_newGene_10432;Manis_javanica_newGene_1070;Manis_javanica_newGene_3877;Manis_javanica_newGene_4991;Manis_javanica_newGene_8141;Manis_javanica_newGene_8784;Manis_javanica_newGene_9656;Manis_javanica_newGene_9888;gene11143;gene11422;gene11748;gene11749;gene11753;gene11755;gene11756;gene11761;gene11762;gene11763;gene11764;gene11765;gene12226;gene12230;gene1…	K06856+K06856+K06856+K06856+K11251+K10651+K06856+K03997+K06856+K05699+K11251+K11252+K11251+K11252+K11251+K11252+K11253+K11251+K11252+K11251+K11253+K11251+K11252+K06752+K05699+K05210+K03990+K03997+K03998+K05443+K04000+K03996+K03995+K05209+K11089+K11253+K05413+K05209+K05210+K03999+K05699+K03987+K11251+K06470+K10651+K11252+K06498+K03161+K06752+K06752+K11252+K04687+K11251+K06752+K06752+K06752+K01330+…
Rheumatoid arthritis	ko05323	101	Manis_javanica_newGene_10431;Manis_javanica_newGene_10432;Manis_javanica_newGene_1070;Manis_javanica_newGene_2860;Manis_javanica_newGene_3877;Manis_javanica_newGene_6686;Manis_javanica_newGene_7609;Manis_javanica_newGene_8784;Manis_javanica_newGene_9888;gene1016;gene10274;gene10334;gene10428;gene10430;gene10666;gene10767;gene10928;gene11343;gene11429;gene11720;gene11807;gene12208;gene12327;gene12…	K06856+K06856+K06856+K02153+K06856+K10031+K01365+K06856+K06856+K02148+K01365+K05405+K10030+K02153+K14379+K05121+K05718+K05476+K02155+K02144+K02150+K10160+K03662+K05453+K06752+K02149+K05482+K05426+K04379+K13376+K02146+K01365+K05475+K03661+K10031+K13377+K01365+K01365+K01365+K05413+K02154+K02150+K10030+K05448+K05473+K12499+K05465+K02148+K01371+K06470+K06538+K13375+K05506+K01365+K02154+K06752+K06752+…
Allograft rejection	ko05330	40	Manis_javanica_newGene_10431;Manis_javanica_newGene_10432;Manis_javanica_newGene_1070;Manis_javanica_newGene_3877;Manis_javanica_newGene_4536;Manis_javanica_newGene_8784;Manis_javanica_newGene_9888;gene11346;gene12499;gene12885;gene14333;gene15258;gene1685;gene1829;gene19413;gene19929;gene20747;gene20996;gene20997;gene21317;gene21718;gene21887;gene21888;gene21889;gene2567;gene25883;gene26508;gene…	K06856+K06856+K06856+K06856+K04390+K06856+K06856+K06751+K06752+K04389+K05443+K05428+K05413+K05406+K06470+K05425+K03161+K06752+K06752+K05429+K04687+K06752+K06752+K06752+K05430+K06751+K06751+K06856+K06751+K06751+K06751+K05412+K01353+K04390+K03160+K06752+K06752+K06752+K03156+K07818
Graft-versus-host disease	ko05332	30	Manis_javanica_newGene_4536;gene10334;gene11346;gene12499;gene12885;gene1685;gene19413;gene20996;gene20997;gene21317;gene21718;gene21887;gene21888;gene21889;gene25883;gene26331;gene26508;gene26693;gene3114;gene3706;gene3707;gene4532;gene4857;gene5086;gene5231;gene792;gene794;gene796;gene9656;gene9772;	K04390+K05405+K06751+K06752+K04389+K05413+K06470+K06752+K06752+K05429+K04687+K06752+K06752+K06752+K06751+K04383+K06751+K04383+K06751+K06751+K06751+K05412+K01353+K04390+K04519+K06752+K06752+K06752+K03156+K07818
Primary immunodeficiency	ko05340	45	Manis_javanica_newGene_10431;Manis_javanica_newGene_10432;Manis_javanica_newGene_1070;Manis_javanica_newGene_12620;Manis_javanica_newGene_14024;Manis_javanica_newGene_3877;Manis_javanica_newGene_8784;Manis_javanica_newGene_9888;gene11483;gene12337;gene14508;gene14599;gene14807;gene15732;gene15735;gene1598;gene16427;gene16622;gene16643;gene17317;gene17815;gene18310;gene18905;gene19415;gene19647;ge…	K06856+K06856+K06856+K06478+K01488+K06856+K06856+K06856+K03648+K07210+K10603+K05070+K06454+K06459+K06458+K07371+K05653+K08060+K05150+K08061+K05072+K05856+K01488+K06713+K05654+K03161+K06451+K06450+K06478+K08062+K06465+K05151+K10988+K10628+K05654+K05653+K16056+K06856+K08063+K07360+K03160+K06506+K10989+K07370+K10887
Hypertrophic cardiomyopathy (HCM)	ko05410	106	Manis_javanica_newGene_12241;Manis_javanica_newGene_3414;Manis_javanica_newGene_6038;Manis_javanica_newGene_6277;gene10168;gene10334;gene1069;gene11070;gene112;gene113;gene11948;gene12090;gene12187;gene12302;gene12553;gene12670;gene13039;gene13330;gene13378;gene13725;gene13871;gene14202;gene14203;gene14204;gene14450;gene14606;gene1524;gene15412;gene15598;gene15761;gene1588;gene159;gene16185;gene1…	K06485+K06585+K07200+K12563+K10373+K05405+K06585+K05692+K01283+K01283+K06586+K10351+K06525+K06480+K06493+K06587+K04962+K07200+K04962+K04851+K12564+K04859+K04859+K04859+K13376+K07199+K06590+K04853+K05865+K13377+K06525+K10374+K12641+K12045+K06485+K07200+K10366+K04865+K10366+K07199+K07198+K06588+K05459+K06484+K07200+K04962+K04864+K06483+K13375+K04858+K04962+K06476+K06588+K04862+K12568+K04867+K10375+…
Arrhythmogenic right ventricular cardiomyopathy (ARVC)	ko05412	99	Manis_javanica_newGene_12241;Manis_javanica_newGene_3414;Manis_javanica_newGene_6277;Manis_javanica_newGene_6619;gene1069;gene11070;gene11143;gene11213;gene11948;gene12187;gene12302;gene12553;gene12670;gene12792;gene12835;gene13039;gene13378;gene13725;gene13871;gene14202;gene14203;gene14204;gene1524;gene15412;gene1588;gene16185;gene16223;gene16641;gene16656;gene16942;gene17105;gene17190;gene17386…	K06485+K06585+K12563+K04491+K06585+K05692+K05699+K10056+K06586+K06525+K06480+K06493+K06587+K05699+K05691+K04962+K04962+K04851+K12564+K04859+K04859+K04859+K06590+K04853+K06525+K12641+K05691+K06485+K04492+K04490+K02620+K10366+K04865+K10366+K05699+K04491+K06588+K06484+K04962+K04864+K06483+K04858+K04962+K06476+K06588+K04862+K06736+K07372+K04867+K04962+K12565+K06482+K02105+K05691+K04851+K06481+K12566+…
Dilated cardiomyopathy	ko05414	121	Manis_javanica_newGene_10431;Manis_javanica_newGene_10432;Manis_javanica_newGene_1070;Manis_javanica_newGene_12241;Manis_javanica_newGene_3414;Manis_javanica_newGene_3877;Manis_javanica_newGene_6277;Manis_javanica_newGene_8784;Manis_javanica_newGene_9888;gene10168;gene1069;gene11070;gene11948;gene12090;gene12187;gene12302;gene12553;gene12670;gene13039;gene13248;gene13378;gene13725;gene13871;gene1…	K06856+K06856+K06856+K06485+K06585+K06856+K12563+K06856+K06856+K10373+K06585+K05692+K06586+K10351+K06525+K06480+K06493+K06587+K04962+K08042+K04962+K04851+K12564+K04859+K04859+K04859+K13376+K08041+K04345+K06590+K04853+K05865+K13377+K06525+K10374+K12641+K12045+K06485+K10366+K04632+K04865+K08049+K10366+K08047+K04345+K06588+K04345+K05459+K06484+K04962+K04864+K08046+K06483+K13375+K04858+K05852+K04962+…
Viral myocarditis	ko05416	73	Manis_javanica_newGene_10431;Manis_javanica_newGene_10432;Manis_javanica_newGene_1070;Manis_javanica_newGene_10751;Manis_javanica_newGene_11333;Manis_javanica_newGene_13321;Manis_javanica_newGene_13679;Manis_javanica_newGene_3877;Manis_javanica_newGene_4227;Manis_javanica_newGene_6277;Manis_javanica_newGene_8784;Manis_javanica_newGene_9888;gene10337;gene10587;gene10928;gene10982;gene11070;gene113…	K06856+K06856+K06856+K08887+K04398+K17751+K04399+K06856+K06619+K12563+K06856+K06856+K03260+K04398+K05718+K06278+K05692+K06751+K17751+K17751+K17751+K06752+K12564+K03260+K17751+K04006+K05413+K10366+K10366+K04399+K04392+K06619+K04006+K06470+K03161+K06788+K06752+K06752+K06752+K06752+K06752+K04399+K12565+K04726+K12566+K17751+K04503+K06751+K06464+K06751+K02187+K06856+K06751+K06751+K06751+K05412+K07860+…
