# Supplementary material for: Transcriptomic analysis identifies genes and pathways related to myrmecophagy in the Malayan pangolin (Manis javanica)
Source: PeerJ. 2017 Dec 22;5:e4140. doi: 10.7717/peerj.4140 (PMC5742527; doi:10.7717/peerj.4140)
Supplement: File S7 [file peerj-05-4140-s007.xlsx]

## Sheet: opsin
#GeneID	COG_class	COG_class_annotation	GO_annotation	KEGG_annotation	KOG_class	KOG_class_annotation	Swissprot_annotation	TrEMBL_annotation	nr_annotation
gene16300	--	--	Molecular Function: 11-cis retinal binding (GO:0005502);; Cellular Component: plasma membrane (GO:0005886);; Biological Process: visual perception (GO:0007601);; Molecular Function: G-protein coupled photoreceptor activity (GO:0008020);; Cellular Component: integral component of membrane (GO:0016021);; Biological Process: rhodopsin mediated signaling pathway (GO:0016056);; Biological Process: pro…	K04255|0|cfr:102513406|melanopsin-like; K04255 r-opsin (A)	[R]	General function prediction only	Melanopsin GN=OPN4 OS=Felis catus (Cat) PE=2 SV=1	Uncharacterized protein {ECO:0000313|Ensembl:ENSBTAP00000039840} OS=Bos taurus (Bovine) PE=3 SV=2	PREDICTED: melanopsin isoform X1 [Vicugna pacos]
gene11561	[RTKL]	--	Molecular Function: G-protein coupled receptor kinase activity (GO:0004703);; Molecular Function: ATP binding (GO:0005524);; Biological Process: apoptotic process (GO:0006915);; Biological Process: photoreceptor cell morphogenesis (GO:0008594);; Biological Process: regulation of rhodopsin mediated signaling pathway (GO:0022400);; Biological Process: termination of G-protein coupled receptor signa…	K00909|0|cfa:485557|GRK1; G protein-coupled receptor kinase 1; K00909 rhodopsin kinase [EC:2.7.11.14] (A)	[T]	Signal transduction mechanisms	Rhodopsin kinase (Precursor) GN=GRK1 OS=Bos taurus (Bovine) PE=1 SV=1	Uncharacterized protein {ECO:0000313|Ensembl:ENSCAFP00000009579} OS=Canis familiaris (Dog) PE=3 SV=2	PREDICTED: rhodopsin kinase [Odobenus rosmarus divergens]
gene17308	--	--	Molecular Function: G-protein coupled receptor activity (GO:0004930);; Biological Process: G-protein coupled receptor signaling pathway (GO:0007186);; Molecular Function: photoreceptor activity (GO:0009881);; Cellular Component: integral component of membrane (GO:0016021);; Biological Process: protein-chromophore linkage (GO:0018298);;	K04256|3.32122e-165|fca:101095542|OPN3; opsin 3; K04256 c-opsin (A)	[R]	General function prediction only	Rhodopsin GN=RHO OS=Bos taurus (Bovine) PE=1 SV=1	Uncharacterized protein {ECO:0000313|Ensembl:ENSPANP00000015042} (Fragment) OS=Papio anubis (Olive baboon) PE=4 SV=1	PREDICTED: opsin-3, partial [Ceratotherium simum simum]
gene20915	--	--	Molecular Function: G-protein coupled receptor activity (GO:0004930);; Biological Process: G-protein coupled receptor signaling pathway (GO:0007186);; Biological Process: visual perception (GO:0007601);; Molecular Function: photoreceptor activity (GO:0009881);; Cellular Component: integral component of membrane (GO:0016021);; Biological Process: protein-chromophore linkage (GO:0018298);;	K04253|1.0569e-150|pale:102883498|RRH; retinal pigment epithelium-derived rhodopsin homolog; K04253 visual pigment-like receptor peropsin (A)	[R]	General function prediction only	Melanopsin GN=OPN4 OS=Felis catus (Cat) PE=2 SV=1	Uncharacterized protein {ECO:0000313|Ensembl:ENSOGAP00000004198} OS=Otolemur garnettii (Small-eared galago) PE=3 SV=1	PREDICTED: visual pigment-like receptor peropsin [Pteropus alecto]
gene20548	--	--	Biological Process: activation of MAPK activity (GO:0000187);; Biological Process: visual perception (GO:0007601);; Molecular Function: cGMP binding (GO:0030553);; Biological Process: positive regulation of epidermal growth factor receptor signaling pathway (GO:0045742);; Biological Process: positive regulation of G-protein coupled receptor protein signaling pathway (GO:0045745);; Molecular Funct…	K13759|9.2685e-64|pon:100444908|PDE6G; phosphodiesterase 6G, cGMP-specific, rod, gamma; K13759 retinal rod rhodopsin-sensitive cGMP 3',5'-cyclic phosphodiesterase subunit gamma (A)	--	--	Retinal rod rhodopsin-sensitive cGMP 3&apos;,5&apos;-cyclic phosphodiesterase subunit gamma GN=PDE6G OS=Bos taurus (Bovine) PE=1 SV=1	Uncharacterized protein {ECO:0000313|Ensembl:ENSECAP00000009760} (Fragment) OS=Equus caballus (Horse) PE=4 SV=1	PREDICTED: oxidoreductase-like domain-containing protein 1 [Ceratotherium simum simum]
gene19178	--	--	Molecular Function: 3',5'-cyclic-nucleotide phosphodiesterase activity (GO:0004114);; Molecular Function: GTPase inhibitor activity (GO:0005095);; Biological Process: visual perception (GO:0007601);; Biological Process: regulation of GTP catabolic process (GO:0033124);; Biological Process: response to stimulus (GO:0050896);;	K13758|2.30559e-120|fca:101096755|PDE6D; phosphodiesterase 6D, cGMP-specific, rod, delta; K13758 retinal rod rhodopsin-sensitive cGMP 3',5'-cyclic phosphodiesterase subunit delta (A)	[T]	Signal transduction mechanisms	Retinal rod rhodopsin-sensitive cGMP 3&apos;,5&apos;-cyclic phosphodiesterase subunit delta GN=PDE6D OS=Bos taurus (Bovine) PE=1 SV=1	Putative cgmp-phosphodiesterase delta subunit {ECO:0000313|EMBL:JAA45164.1} OS=Desmodus rotundus (Vampire bat) PE=2 SV=1	retinal rod rhodopsin-sensitive cGMP 3&apos;,5&apos;-cyclic phosphodiesterase subunit delta [Bos taurus]
gene1324	--	--	Biological Process: activation of MAPK activity (GO:0000187);; Biological Process: visual perception (GO:0007601);; Molecular Function: cGMP binding (GO:0030553);; Biological Process: positive regulation of epidermal growth factor receptor signaling pathway (GO:0045742);; Biological Process: positive regulation of G-protein coupled receptor protein signaling pathway (GO:0045745);; Molecular Funct…	K13760|2.63945e-45|umr:103677781|PDE6H; phosphodiesterase 6H, cGMP-specific, cone, gamma; K13760 retinal cone rhodopsin-sensitive cGMP 3',5'-cyclic phosphodiesterase subunit gamma (A)	--	--	Retinal cone rhodopsin-sensitive cGMP 3&apos;,5&apos;-cyclic phosphodiesterase subunit gamma GN=PDE6H OS=Bos taurus (Bovine) PE=3 SV=1	Uncharacterized protein {ECO:0000313|Ensembl:ENSCAFP00000018954} OS=Canis familiaris (Dog) PE=4 SV=2	PREDICTED: retinal cone rhodopsin-sensitive cGMP 3&apos;,5&apos;-cyclic phosphodiesterase subunit gamma isoform X2 [Mustela putorius furo]
gene22150	--	--	Molecular Function: G-protein coupled receptor activity (GO:0004930);; Biological Process: G-protein coupled receptor signaling pathway (GO:0007186);; Biological Process: visual perception (GO:0007601);; Molecular Function: photoreceptor activity (GO:0009881);; Cellular Component: integral component of membrane (GO:0016021);; Biological Process: protein-chromophore linkage (GO:0018298);;	K08385|0|ecb:100055886|OPN5; opsin 5; K08385 G0-opsin (A)	--	--	Melanopsin GN=OPN4 OS=Felis catus (Cat) PE=2 SV=1	Uncharacterized protein {ECO:0000313|Ensembl:ENSGGOP00000016234} OS=Gorilla gorilla gorilla (Lowland gorilla) PE=3 SV=1	PREDICTED: opsin-5 [Dasypus novemcinctus]
gene26099	--	--	Molecular Function: G-protein coupled receptor activity (GO:0004930);; Molecular Function: guanyl-nucleotide exchange factor activity (GO:0005085);; Molecular Function: protein binding (GO:0005515);; Cellular Component: Golgi apparatus (GO:0005794);; Biological Process: protein phosphorylation (GO:0006468);; Biological Process: G-protein coupled receptor signaling pathway (GO:0007186);; Biologica…	K04250|0|pale:102895858|RHO; rhodopsin; K04250 rhodopsin (A)	[R]	General function prediction only	Rhodopsin GN=RHO OS=Felis catus (Cat) PE=2 SV=1	Rhodopsin {ECO:0000256|RuleBase:RU004951} OS=Pteropus alecto (Black flying fox) PE=3 SV=1	PREDICTED: rhodopsin [Pteropus alecto]
gene4463	--	--	Biological Process: signal transduction (GO:0007165);; Cellular Component: membrane (GO:0016020);; Molecular Function: signaling receptor activity (GO:0038023);;	K04252|2.06893e-133|pale:102894987|OPN1SW; opsin 1 (cone pigments), short-wave-sensitive; K04252 short wavelength-sensitive opsin (A)	[R]	General function prediction only	Short-wave-sensitive opsin 1 GN=OPN1SW OS=Bos taurus (Bovine) PE=1 SV=1	Short wavelength-sensitive opsin {ECO:0000313|EMBL:ACF70481.1} OS=Myotis ricketti (Rickett's big-footed bat) PE=2 SV=1	PREDICTED: short-wave-sensitive opsin 1 [Eptesicus fuscus]
gene21259	--	--	Cellular Component: photoreceptor outer segment (GO:0001750);; Molecular Function: G-protein coupled receptor activity (GO:0004930);; Biological Process: G-protein coupled receptor signaling pathway (GO:0007186);; Biological Process: visual perception (GO:0007601);; Biological Process: phototransduction (GO:0007602);; Molecular Function: photoreceptor activity (GO:0009881);; Cellular Component: i…	K04251|0|myd:102757152|long-wave-sensitive opsin 1-like; K04251 long/medium wavelength-sensitive opsin (A)	[R]	General function prediction only	Long-wave-sensitive opsin 1 GN=OPN1LW OS=Canis familiaris (Dog) PE=2 SV=2	Uncharacterized protein {ECO:0000313|Ensembl:ENSMLUP00000013008} OS=Myotis lucifugus (Little brown bat) PE=3 SV=1	PREDICTED: long-wave-sensitive opsin 1-like [Myotis lucifugus]

## Sheet: taste
#GeneID	COG_class	COG_class_annotation	GO_annotation	KEGG_annotation	KOG_class	KOG_class_annotation	Swissprot_annotation	TrEMBL_annotation	nr_annotation
gene23223	--	--	Molecular Function: G-protein coupled receptor activity (GO:0004930);; Biological Process: G-protein coupled receptor signaling pathway (GO:0007186);; Cellular Component: integral component of membrane (GO:0016021);; Biological Process: sensory perception of taste (GO:0050909);;	K08474|6.56202e-136|cfa:100271734|TAS2R10, CAFA-T2R10; taste receptor, type 2, member 10; K08474 taste receptor type 2 (A)	--	--	Taste receptor type 2 member 10 GN=TAS2R10 OS=Papio hamadryas (Hamadryas baboon) PE=3 SV=1	Taste receptor type 2 {ECO:0000256|RuleBase:RU004424} OS=Canis familiaris (Dog) PE=3 SV=1	taste receptor, type 2, member 10 [Canis lupus familiaris]
gene7286	[E]	Amino acid transport and metabolism	Molecular Function: G-protein coupled GABA receptor activity (GO:0004965);; Cellular Component: cytoplasm (GO:0005737);; Biological Process: gamma-aminobutyric acid signaling pathway (GO:0007214);; Cellular Component: integral component of membrane (GO:0016021);; Cellular Component: G-protein coupled receptor dimeric complex (GO:0038037);; Cellular Component: presynaptic membrane (GO:0042734);; C…	K04615|0|cjc:100397234|GABBR1; gamma-aminobutyric acid (GABA) B receptor, 1; K04615 gamma-aminobutyric acid type B receptor (A)	[PET]	--	Taste receptor type 1 member 3 (Precursor) GN=TAS1R3 OS=Felis catus (Cat) PE=2 SV=1	Uncharacterized protein {ECO:0000313|Ensembl:ENSAMEP00000017070} (Fragment) OS=Ailuropoda melanoleuca (Giant panda) PE=4 SV=1	PREDICTED: gamma-aminobutyric acid type B receptor subunit 1 [Condylura cristata]
gene10947	--	--	Molecular Function: signal transducer activity (GO:0004871);; Biological Process: signal transduction (GO:0007165);; Cellular Component: membrane (GO:0016020);;	K08474|1.14425e-135|ptg:102969296|taste receptor type 2 member 38-like; K08474 taste receptor type 2 (A)	--	--	Taste receptor type 2 member 38 GN=TAS2R38 OS=Gorilla gorilla gorilla (Lowland gorilla) PE=3 SV=1	Taste receptor type 2 {ECO:0000256|RuleBase:RU004424} OS=Canis familiaris (Dog) PE=3 SV=2	PREDICTED: taste receptor type 2 member 38-like [Panthera tigris altaica]
gene22319	--	--	Cellular Component: plasma membrane (GO:0005886);; Biological Process: G-protein coupled receptor signaling pathway (GO:0007186);; Molecular Function: taste receptor activity (GO:0008527);; Cellular Component: integral component of membrane (GO:0016021);; Biological Process: detection of chemical stimulus involved in sensory perception of taste (GO:0050912);; Biological Process: sensory perceptio…	K04624|0|fca:101091714|taste receptor type 1 member 1-like; K04624 taste receptor type 1 member 1 (A)	[PT]	--	Taste receptor type 1 member 2 (Precursor) GN=TAS1R2 OS=Canis familiaris (Dog) PE=2 SV=1	Uncharacterized protein {ECO:0000313|Ensembl:ENSFCAP00000000611} (Fragment) OS=Felis catus (Cat) PE=4 SV=1	PREDICTED: taste receptor type 1 member 1 isoform X2 [Felis catus]
gene23221	--	--	Molecular Function: G-protein coupled receptor activity (GO:0004930);; Biological Process: G-protein coupled receptor signaling pathway (GO:0007186);; Cellular Component: integral component of membrane (GO:0016021);; Biological Process: sensory perception of taste (GO:0050909);;	K08474|1.79937e-145|cfa:100271739|TAS2R7, CAFA-T2R7; taste receptor, type 2, member 7; K08474 taste receptor type 2 (A)	--	--	Taste receptor type 2 member 7 GN=TAS2R7 OS=Papio hamadryas (Hamadryas baboon) PE=3 SV=1	Taste receptor type 2 {ECO:0000256|RuleBase:RU004424} OS=Equus caballus (Horse) PE=3 SV=1	Taste receptor type 2 member 7 [Pteropus alecto]
gene21826	--	--	Molecular Function: signal transducer activity (GO:0004871);; Biological Process: signal transduction (GO:0007165);; Cellular Component: membrane (GO:0016020);;	K08474|2.66647e-122|ecb:100054561|taste receptor type 2 member 1-like; K08474 taste receptor type 2 (A)	--	--	Taste receptor type 2 member 1 GN=TAS2R1 OS=Pongo pygmaeus (Bornean orangutan) PE=3 SV=1	Taste receptor type 2 {ECO:0000256|RuleBase:RU004424} OS=Felis catus (Cat) PE=3 SV=1	PREDICTED: taste receptor type 2 member 1-like [Ceratotherium simum simum]
gene26859	--	--	Molecular Function: G-protein coupled receptor activity (GO:0004930);; Cellular Component: membrane (GO:0016020);; Biological Process: single-organism process (GO:0044699);; Biological Process: response to stimulus (GO:0050896);;	K04625|5.00831e-117|aml:100475590|taste receptor type 1 member 2-like; K04625 taste receptor type 1 member 2 (A)	[PT]	--	Taste receptor type 1 member 2 (Precursor) GN=TAS1R2 OS=Canis familiaris (Dog) PE=2 SV=1	Uncharacterized protein {ECO:0000313|Ensembl:ENSMLUP00000005591} (Fragment) OS=Myotis lucifugus (Little brown bat) PE=4 SV=1	G-protein coupled receptor [Proteles cristatus]
gene3222	--	--	Molecular Function: G-protein coupled receptor activity (GO:0004930);; Biological Process: cellular process (GO:0009987);; Cellular Component: membrane (GO:0016020);; Biological Process: response to stimulus (GO:0050896);; Biological Process: sensory perception of taste (GO:0050909);;	K04625|3.26812e-99|pale:102892016|taste receptor type 1 member 2-like; K04625 taste receptor type 1 member 2 (A)	[PT]	--	Taste receptor type 1 member 2 (Precursor) GN=TAS1R2 OS=Canis familiaris (Dog) PE=2 SV=1	Taste receptor type 1 member 2 {ECO:0000313|EMBL:ADJ37111.1} OS=Pteropus vampyrus (Large flying fox) PE=4 SV=1	taste receptor type 1 member 2 [Pteropus vampyrus]
gene15800	--	--	--	--	[PT]	--	Taste receptor type 1 member 3 (Precursor) GN=TAS1R3 OS=Felis catus (Cat) PE=2 SV=1	Uncharacterized protein {ECO:0000313|Ensembl:ENSOCUP00000018201} (Fragment) OS=Oryctolagus cuniculus (Rabbit) PE=4 SV=1	PREDICTED: vomeronasal type-2 receptor 26-like [Dasypus novemcinctus]
gene1814	--	--	Biological Process: detection of chemical stimulus involved in sensory perception of sweet taste (GO:0001582);; Cellular Component: plasma membrane (GO:0005886);; Biological Process: G-protein coupled receptor signaling pathway (GO:0007186);; Cellular Component: integral component of membrane (GO:0016021);; Molecular Function: sweet taste receptor activity (GO:0033041);; Biological Process: senso…	K04626|0|aml:100471724|taste receptor type 1 member 3-like; K04626 taste receptor type 1 member 3 (A)	[PT]	--	Taste receptor type 1 member 3 (Precursor) GN=TAS1R3 OS=Felis catus (Cat) PE=2 SV=1	Uncharacterized protein {ECO:0000313|Ensembl:ENSAMEP00000014535} (Fragment) OS=Ailuropoda melanoleuca (Giant panda) PE=4 SV=1	hypothetical protein PANDA_020175 [Ailuropoda melanoleuca]
gene26944	--	--	Molecular Function: G-protein coupled receptor activity (GO:0004930);; Biological Process: G-protein coupled receptor signaling pathway (GO:0007186);; Cellular Component: integral component of membrane (GO:0016021);; Biological Process: sensory perception of taste (GO:0050909);;	K08474|3.1638e-106|aml:100476837|taste receptor type 2 member 31-like; K08474 taste receptor type 2 (A)	--	--	Taste receptor type 2 member 30 GN=TAS2R30 OS=Pan troglodytes (Chimpanzee) PE=3 SV=1	Taste receptor type 2 {ECO:0000256|RuleBase:RU004424} (Fragment) OS=Ailuropoda melanoleuca (Giant panda) PE=3 SV=1	PREDICTED: taste receptor type 2 member 31 [Ailuropoda melanoleuca]
gene2361	--	--	Molecular Function: G-protein coupled receptor activity (GO:0004930);; Biological Process: G-protein coupled receptor signaling pathway (GO:0007186);; Biological Process: respiratory gaseous exchange (GO:0007585);; Cellular Component: integral component of membrane (GO:0016021);; Biological Process: sensory perception of taste (GO:0050909);;	K08474|1.43828e-139|ecb:100146597|taste receptor type 2 member 4-like; K08474 taste receptor type 2 (A)	--	--	Taste receptor type 2 member 4 GN=TAS2R4 OS=Papio hamadryas (Hamadryas baboon) PE=3 SV=1	Taste receptor type 2 {ECO:0000256|RuleBase:RU004424} OS=Equus caballus (Horse) PE=3 SV=1	PREDICTED: taste receptor type 2 member 4 [Equus przewalskii]
gene15574	--	--	Molecular Function: signal transducer activity (GO:0004871);; Biological Process: signal transduction (GO:0007165);; Cellular Component: membrane (GO:0016020);;	K08474|7.13573e-123|aml:100473292|taste receptor type 2 member 40-like; K08474 taste receptor type 2 (A)	--	--	Taste receptor type 2 member 40 GN=TAS2R40 OS=Papio hamadryas (Hamadryas baboon) PE=3 SV=1	Taste receptor type 2 {ECO:0000256|RuleBase:RU004424} OS=Ailuropoda melanoleuca (Giant panda) PE=3 SV=1	PREDICTED: taste receptor type 2 member 40-like [Ceratotherium simum simum]
gene11152	--	--	Biological Process: single-organism process (GO:0044699);; Biological Process: response to stimulus (GO:0050896);;	K08474|3.38297e-70|aml:100473292|taste receptor type 2 member 40-like; K08474 taste receptor type 2 (A)	--	--	Taste receptor type 2 member 40 GN=TAS2R40 OS=Papio hamadryas (Hamadryas baboon) PE=3 SV=1	Taste receptor type 2 {ECO:0000256|RuleBase:RU004424} (Fragment) OS=Ailuropoda melanoleuca (Giant panda) PE=3 SV=1	PREDICTED: taste receptor type 2 member 40-like [Ceratotherium simum simum]

## Sheet: olfactory
#GeneID	COG_class	COG_class_annotation	GO_annotation	KEGG_annotation	KOG_class	KOG_class_annotation	Swissprot_annotation	TrEMBL_annotation	nr_annotation
gene18954	--	--	Molecular Function: G-protein coupled receptor activity (GO:0004930);; Molecular Function: olfactory receptor activity (GO:0004984);; Cellular Component: plasma membrane (GO:0005886);; Cellular Component: integral component of membrane (GO:0016021);;	K04257|0|ocu:100352423|olfactory receptor 2B6-like; K04257 olfactory receptor (A)	--	--	Olfactory receptor-like protein OLF1 OS=Canis familiaris (Dog) PE=3 SV=1	Uncharacterized protein {ECO:0000313|Ensembl:ENSSSCP00000004278} OS=Sus scrofa (Pig) PE=4 SV=1	PREDICTED: olfactory receptor 2B6-like [Oryctolagus cuniculus]
gene7746	--	--	Molecular Function: G-protein coupled receptor activity (GO:0004930);; Molecular Function: olfactory receptor activity (GO:0004984);; Cellular Component: integral component of membrane (GO:0016021);;	K04257|0|ecb:100058247|olfactory receptor 2G3-like; K04257 olfactory receptor (A)	--	--	Olfactory receptor-like protein OLF3 OS=Canis familiaris (Dog) PE=3 SV=1	Olfactory receptor {ECO:0000256|RuleBase:RU000688} OS=Camelus ferus (Wild Bactrian camel) PE=3 SV=1	PREDICTED: olfactory receptor 2G3-like [Vicugna pacos]
gene21285	--	--	Molecular Function: G-protein coupled receptor activity (GO:0004930);; Molecular Function: olfactory receptor activity (GO:0004984);; Cellular Component: plasma membrane (GO:0005886);; Biological Process: G-protein coupled receptor signaling pathway (GO:0007186);; Cellular Component: integral component of membrane (GO:0016021);; Biological Process: detection of chemical stimulus involved in senso…	K04257|0|mcc:707954|olfactory receptor 10C1-like; K04257 olfactory receptor (A)	--	--	Olfactory receptor 1G1 GN=OR1G1 OS=Gorilla gorilla gorilla (Lowland gorilla) PE=3 SV=1	Olfactory receptor {ECO:0000256|RuleBase:RU000688} OS=Oryctolagus cuniculus (Rabbit) PE=3 SV=1	PREDICTED: olfactory receptor 10C1-like [Chrysochloris asiatica]
gene11581	--	--	Molecular Function: G-protein coupled receptor activity (GO:0004930);; Molecular Function: olfactory receptor activity (GO:0004984);; Cellular Component: plasma membrane (GO:0005886);; Biological Process: G-protein coupled receptor signaling pathway (GO:0007186);; Cellular Component: integral component of membrane (GO:0016021);; Biological Process: detection of chemical stimulus involved in senso…	K04257|1.3807e-177|myd:102774638|olfactory receptor 4K1-like; K04257 olfactory receptor (A)	--	--	Olfactory receptor-like protein OLF1 OS=Canis familiaris (Dog) PE=3 SV=1	Olfactory receptor {ECO:0000256|RuleBase:RU000688} OS=Pteropus alecto (Black flying fox) PE=3 SV=1	PREDICTED: olfactory receptor 4K3-like [Condylura cristata]
gene17882	--	--	--	K04257|3.83173e-143|ngi:103750360|olfactory receptor 5V1-like; K04257 olfactory receptor (A)	--	--	Olfactory receptor 1G1 GN=OR1G1 OS=Gorilla gorilla gorilla (Lowland gorilla) PE=3 SV=1	Olfactory receptor {ECO:0000256|RuleBase:RU000688} OS=Bos mutus PE=3 SV=1	PREDICTED: olfactory receptor 5V1-like [Ursus maritimus]
gene15837	--	--	Molecular Function: G-protein coupled receptor activity (GO:0004930);; Molecular Function: olfactory receptor activity (GO:0004984);; Cellular Component: plasma membrane (GO:0005886);; Biological Process: G-protein coupled receptor signaling pathway (GO:0007186);; Cellular Component: integral component of membrane (GO:0016021);; Biological Process: detection of chemical stimulus involved in senso…	--	--	--	Olfactory receptor 1G1 GN=OR1G1 OS=Gorilla gorilla gorilla (Lowland gorilla) PE=3 SV=1	Olfactory receptor {ECO:0000256|RuleBase:RU000688} OS=Loxodonta africana (African elephant) PE=3 SV=1	PREDICTED: olfactory receptor 14A16-like [Echinops telfairi]
gene23289	--	--	Molecular Function: G-protein coupled receptor activity (GO:0004930);; Molecular Function: olfactory receptor activity (GO:0004984);; Cellular Component: plasma membrane (GO:0005886);; Biological Process: G-protein coupled receptor signaling pathway (GO:0007186);; Cellular Component: integral component of membrane (GO:0016021);; Biological Process: detection of chemical stimulus involved in senso…	K04257|3.56646e-151|myb:102253278|olfactory receptor 52E5-like; K04257 olfactory receptor (A)	--	--	Olfactory receptor 1E1 GN=OR1E1 OS=Pan troglodytes (Chimpanzee) PE=3 SV=1	Olfactory receptor {ECO:0000256|RuleBase:RU000688} OS=Myotis lucifugus (Little brown bat) PE=3 SV=1	PREDICTED: olfactory receptor 52E5-like [Echinops telfairi]
gene23437	--	--	Molecular Function: transmembrane signaling receptor activity (GO:0004888);; Cellular Component: membrane (GO:0016020);;	K04257|3.31732e-130|bom:102283856|olfactory receptor 2T29-like; K04257 olfactory receptor (A)	--	--	Olfactory receptor-like protein OLF3 OS=Canis familiaris (Dog) PE=3 SV=1	Olfactory receptor {ECO:0000256|RuleBase:RU000688} (Fragment) OS=Bos mutus PE=3 SV=1	PREDICTED: olfactory receptor 2M2-like [Trichechus manatus latirostris]
gene26037	--	--	--	K04257|1.69398e-127|ptg:102950198|olfactory receptor-like protein OLF4-like; K04257 olfactory receptor (A)	--	--	Olfactory receptor-like protein OLF4 OS=Canis familiaris (Dog) PE=3 SV=1	Olfactory receptor {ECO:0000256|RuleBase:RU000688} OS=Ailuropoda melanoleuca (Giant panda) PE=3 SV=1	PREDICTED: olfactory receptor-like protein OLF4-like [Panthera tigris altaica]
gene4234	--	--	Molecular Function: transmembrane signaling receptor activity (GO:0004888);; Biological Process: signal transduction (GO:0007165);; Biological Process: sensory perception of smell (GO:0007608);; Cellular Component: membrane (GO:0016020);;	K04257|1.84865e-93|ecb:100065637|olfactory receptor 14C36-like; K04257 olfactory receptor (A)	--	--	Olfactory receptor 1G1 GN=OR1G1 OS=Gorilla gorilla gorilla (Lowland gorilla) PE=3 SV=1	Uncharacterized protein {ECO:0000313|Ensembl:ENSLAFP00000025646} OS=Loxodonta africana (African elephant) PE=4 SV=1	PREDICTED: olfactory receptor 14C36-like [Condylura cristata]
gene474	--	--	Molecular Function: G-protein coupled receptor activity (GO:0004930);; Molecular Function: olfactory receptor activity (GO:0004984);; Cellular Component: plasma membrane (GO:0005886);; Biological Process: G-protein coupled receptor signaling pathway (GO:0007186);; Cellular Component: integral component of membrane (GO:0016021);; Biological Process: detection of chemical stimulus involved in senso…	K04257|8.8581e-167|fca:101095449|olfactory receptor-like protein DTMT-like; K04257 olfactory receptor (A)	--	--	Olfactory receptor-like protein DTMT OS=Canis familiaris (Dog) PE=3 SV=1	Olfactory receptor {ECO:0000256|RuleBase:RU000688} OS=Felis catus (Cat) PE=3 SV=1	PREDICTED: olfactory receptor-like protein DTMT [Felis catus]
gene26690	--	--	Molecular Function: G-protein coupled receptor activity (GO:0004930);; Molecular Function: olfactory receptor activity (GO:0004984);; Cellular Component: plasma membrane (GO:0005886);; Biological Process: G-protein coupled receptor signaling pathway (GO:0007186);; Cellular Component: integral component of membrane (GO:0016021);; Biological Process: detection of chemical stimulus involved in senso…	K04257|6.18734e-138|fca:101082987|olfactory receptor 7E24-like; K04257 olfactory receptor (A)	--	--	Olfactory receptor-like protein OLF4 OS=Canis familiaris (Dog) PE=3 SV=1	Olfactory receptor {ECO:0000256|RuleBase:RU000688} OS=Felis catus (Cat) PE=3 SV=1	PREDICTED: olfactory receptor 18-like [Trichechus manatus latirostris]
gene22786	--	--	--	K04257|5.71457e-177|tup:102489478|olfactory receptor 6C2-like; K04257 olfactory receptor (A)	--	--	Olfactory receptor-like protein OLF4 OS=Canis familiaris (Dog) PE=3 SV=1	Olfactory receptor {ECO:0000256|RuleBase:RU000688} OS=Tupaia chinensis (Chinese tree shrew) PE=3 SV=1	PREDICTED: olfactory receptor 6C2-like [Mustela putorius furo]
gene19671	--	--	Molecular Function: G-protein coupled receptor activity (GO:0004930);; Molecular Function: olfactory receptor activity (GO:0004984);; Cellular Component: plasma membrane (GO:0005886);; Biological Process: G-protein coupled receptor signaling pathway (GO:0007186);; Cellular Component: integral component of membrane (GO:0016021);; Biological Process: detection of chemical stimulus involved in senso…	K04257|0|ggo:101144268|olfactory receptor 51F2-like; K04257 olfactory receptor (A)	--	--	Olfactory receptor 3A2 GN=OR3A2 OS=Pan troglodytes (Chimpanzee) PE=3 SV=1	Olfactory receptor {ECO:0000256|RuleBase:RU000688} OS=Otolemur garnettii (Small-eared galago) PE=3 SV=1	PREDICTED: olfactory receptor 51F2-like [Ursus maritimus]
gene25335	--	--	Molecular Function: G-protein coupled receptor activity (GO:0004930);; Molecular Function: olfactory receptor activity (GO:0004984);; Cellular Component: plasma membrane (GO:0005886);; Biological Process: G-protein coupled receptor signaling pathway (GO:0007186);; Cellular Component: integral component of membrane (GO:0016021);; Biological Process: detection of chemical stimulus involved in senso…	K04257|1.56697e-172|cge:100756155|olfactory receptor 2A1/2A42-like; K04257 olfactory receptor (A)	--	--	Olfactory receptor-like protein OLF3 OS=Canis familiaris (Dog) PE=3 SV=1	Olfactory receptor {ECO:0000256|RuleBase:RU000688} (Fragment) OS=Otolemur garnettii (Small-eared galago) PE=3 SV=1	PREDICTED: olfactory receptor 2A1/2A42-like [Mustela putorius furo]
gene24684	--	--	Molecular Function: G-protein coupled receptor activity (GO:0004930);; Molecular Function: olfactory receptor activity (GO:0004984);; Cellular Component: plasma membrane (GO:0005886);; Biological Process: G-protein coupled receptor signaling pathway (GO:0007186);; Cellular Component: integral component of membrane (GO:0016021);; Biological Process: detection of chemical stimulus involved in senso…	K04257|7.69112e-161|ptg:102953540|olfactory receptor 7G3-like; K04257 olfactory receptor (A)	--	--	Olfactory receptor-like protein OLF4 OS=Canis familiaris (Dog) PE=3 SV=1	Olfactory receptor {ECO:0000256|RuleBase:RU000688} OS=Myotis davidii (David's myotis) PE=3 SV=1	PREDICTED: olfactory receptor 7G3-like [Panthera tigris altaica]
gene26595	--	--	Molecular Function: G-protein coupled receptor activity (GO:0004930);; Molecular Function: olfactory receptor activity (GO:0004984);; Cellular Component: plasma membrane (GO:0005886);; Biological Process: G-protein coupled receptor signaling pathway (GO:0007186);; Cellular Component: integral component of membrane (GO:0016021);; Biological Process: detection of chemical stimulus involved in senso…	K04257|0|fca:101083349|olfactory receptor 6C2-like; K04257 olfactory receptor (A)	--	--	Olfactory receptor-like protein OLF3 OS=Canis familiaris (Dog) PE=3 SV=1	Olfactory receptor {ECO:0000256|RuleBase:RU000688} OS=Felis catus (Cat) PE=3 SV=1	PREDICTED: olfactory receptor 6C2-like [Felis catus]
gene19696	--	--	Molecular Function: G-protein coupled receptor activity (GO:0004930);; Molecular Function: olfactory receptor activity (GO:0004984);; Cellular Component: plasma membrane (GO:0005886);; Biological Process: G-protein coupled receptor signaling pathway (GO:0007186);; Cellular Component: integral component of membrane (GO:0016021);; Biological Process: detection of chemical stimulus involved in senso…	K04257|3.26199e-59|cfa:485293|cOR52N8; cOR52N8 olfactory receptor family 52 subfamily N-like; K04257 olfactory receptor (A)	--	--	Olfactory receptor 1D5 GN=OR1D5 OS=Gorilla gorilla gorilla (Lowland gorilla) PE=3 SV=1	Olfactory receptor {ECO:0000256|RuleBase:RU000688} (Fragment) OS=Oryctolagus cuniculus (Rabbit) PE=3 SV=1	PREDICTED: olfactory receptor 52N4-like [Chrysochloris asiatica]
gene11449	--	--	Molecular Function: G-protein coupled receptor activity (GO:0004930);; Molecular Function: olfactory receptor activity (GO:0004984);; Cellular Component: plasma membrane (GO:0005886);; Biological Process: G-protein coupled receptor signaling pathway (GO:0007186);; Cellular Component: integral component of membrane (GO:0016021);; Biological Process: detection of chemical stimulus involved in senso…	K04257|0|fca:101096032|olfactory receptor 6N1-like; K04257 olfactory receptor (A)	--	--	Olfactory receptor-like protein DTMT OS=Canis familiaris (Dog) PE=3 SV=1	Olfactory receptor {ECO:0000256|RuleBase:RU000688} OS=Equus caballus (Horse) PE=3 SV=1	PREDICTED: olfactory receptor 6N1 [Bison bison bison]
gene19661	--	--	Molecular Function: G-protein coupled receptor activity (GO:0004930);; Molecular Function: olfactory receptor activity (GO:0004984);; Cellular Component: plasma membrane (GO:0005886);; Biological Process: G-protein coupled receptor signaling pathway (GO:0007186);; Cellular Component: integral component of membrane (GO:0016021);; Biological Process: detection of chemical stimulus involved in senso…	K04257|0|umr:103681215|olfactory receptor 51A7; K04257 olfactory receptor (A)	--	--	Olfactory receptor 1D2 GN=OR1D2 OS=Gorilla gorilla gorilla (Lowland gorilla) PE=3 SV=1	Olfactory receptor {ECO:0000256|RuleBase:RU000688} OS=Myotis brandtii (Brandt's bat) PE=3 SV=1	PREDICTED: olfactory receptor 51A7 [Ursus maritimus]
gene5314	--	--	Molecular Function: G-protein coupled receptor activity (GO:0004930);; Molecular Function: olfactory receptor activity (GO:0004984);; Cellular Component: plasma membrane (GO:0005886);; Biological Process: G-protein coupled receptor signaling pathway (GO:0007186);; Cellular Component: integral component of membrane (GO:0016021);; Biological Process: detection of chemical stimulus involved in senso…	K04257|4.61923e-133|aml:100481394|olfactory receptor 5K1-like; K04257 olfactory receptor (A)	--	--	Olfactory receptor-like protein OLF1 OS=Canis familiaris (Dog) PE=3 SV=1	Olfactory receptor {ECO:0000256|RuleBase:RU000688} (Fragment) OS=Ailuropoda melanoleuca (Giant panda) PE=3 SV=1	hypothetical protein PANDA_021518 [Ailuropoda melanoleuca]
gene4235	--	--	--	K04257|1.35213e-144|ecb:100065637|olfactory receptor 14C36-like; K04257 olfactory receptor (A)	--	--	Olfactory receptor 1G1 GN=OR1G1 OS=Gorilla gorilla gorilla (Lowland gorilla) PE=3 SV=1	Olfactory receptor 14C36-like protein {ECO:0000313|EMBL:EPY85959.1} OS=Camelus ferus (Wild Bactrian camel) PE=4 SV=1	PREDICTED: olfactory receptor 14C36-like [Condylura cristata]
gene26562	--	--	Molecular Function: G-protein coupled receptor activity (GO:0004930);; Molecular Function: olfactory receptor activity (GO:0004984);; Cellular Component: plasma membrane (GO:0005886);; Biological Process: G-protein coupled receptor signaling pathway (GO:0007186);; Cellular Component: integral component of membrane (GO:0016021);; Biological Process: detection of chemical stimulus involved in senso…	K04257|4.50007e-152|cfa:482245|cOR2G5; cOR2G5 olfactory receptor family 2 subfamily G-like; K04257 olfactory receptor (A)	--	--	Olfactory receptor-like protein OLF3 OS=Canis familiaris (Dog) PE=3 SV=1	Olfactory receptor {ECO:0000256|RuleBase:RU000688} (Fragment) OS=Loxodonta africana (African elephant) PE=3 SV=1	PREDICTED: olfactory receptor 2H1 [Canis lupus familiaris]
gene11579	--	--	Molecular Function: G-protein coupled receptor activity (GO:0004930);; Molecular Function: olfactory receptor activity (GO:0004984);; Cellular Component: plasma membrane (GO:0005886);; Biological Process: G-protein coupled receptor signaling pathway (GO:0007186);; Cellular Component: integral component of membrane (GO:0016021);; Biological Process: detection of chemical stimulus involved in senso…	K04257|1.47261e-174|chx:102177801|olfactory receptor 4K14-like; K04257 olfactory receptor (A)	--	--	Olfactory receptor 1A1 GN=OR1A1 OS=Pan troglodytes (Chimpanzee) PE=3 SV=1	Olfactory receptor {ECO:0000256|RuleBase:RU000688} OS=Ovis aries (Sheep) PE=3 SV=1	PREDICTED: olfactory receptor 4K14-like [Capra hircus]
gene9388	--	--	Molecular Function: G-protein coupled receptor activity (GO:0004930);; Molecular Function: olfactory receptor activity (GO:0004984);; Cellular Component: plasma membrane (GO:0005886);; Biological Process: G-protein coupled receptor signaling pathway (GO:0007186);; Cellular Component: integral component of membrane (GO:0016021);; Biological Process: detection of chemical stimulus involved in senso…	K04257|0|cfa:482236|olfactory receptor 2T4-like; K04257 olfactory receptor (A)	--	--	Olfactory receptor-like protein OLF2 OS=Canis familiaris (Dog) PE=3 SV=1	Olfactory receptor {ECO:0000256|RuleBase:RU000688} OS=Canis familiaris (Dog) PE=3 SV=1	PREDICTED: olfactory receptor 2T4-like [Erinaceus europaeus]
gene9427	--	--	Molecular Function: G-protein coupled receptor activity (GO:0004930);; Molecular Function: olfactory receptor activity (GO:0004984);; Cellular Component: plasma membrane (GO:0005886);; Biological Process: G-protein coupled receptor signaling pathway (GO:0007186);; Cellular Component: integral component of membrane (GO:0016021);; Biological Process: detection of chemical stimulus involved in senso…	K04257|8.11593e-146|cfa:489349|cOR6M5; cOR6M5 olfactory receptor family 6 subfamily M-like; K04257 olfactory receptor (A)	--	--	Olfactory receptor-like protein OLF3 OS=Canis familiaris (Dog) PE=3 SV=1	Olfactory receptor {ECO:0000256|RuleBase:RU000688} OS=Equus caballus (Horse) PE=3 SV=1	PREDICTED: olfactory receptor 6M1 [Canis lupus familiaris]
gene11929	--	--	Molecular Function: G-protein coupled receptor activity (GO:0004930);; Molecular Function: olfactory receptor activity (GO:0004984);; Cellular Component: plasma membrane (GO:0005886);; Biological Process: G-protein coupled receptor signaling pathway (GO:0007186);; Cellular Component: integral component of membrane (GO:0016021);; Biological Process: detection of chemical stimulus involved in senso…	K04257|3.80024e-94|cfa:483603|cOR4C43; cOR4C43 olfactory receptor family 4 subfamily C-like; K04257 olfactory receptor (A)	--	--	Olfactory receptor-like protein DTMT OS=Canis familiaris (Dog) PE=3 SV=1	Olfactory receptor {ECO:0000256|RuleBase:RU000688} OS=Canis familiaris (Dog) PE=3 SV=1	PREDICTED: olfactory receptor 4C46-like [Equus przewalskii]
gene15266	--	--	Molecular Function: G-protein coupled receptor activity (GO:0004930);; Molecular Function: olfactory receptor activity (GO:0004984);; Cellular Component: plasma membrane (GO:0005886);; Biological Process: G-protein coupled receptor signaling pathway (GO:0007186);; Cellular Component: integral component of membrane (GO:0016021);; Biological Process: detection of chemical stimulus involved in senso…	K04257|4.941e-122|umr:103656253|olfactory receptor 147-like; K04257 olfactory receptor (A)	--	--	Olfactory receptor-like protein OLF2 OS=Canis familiaris (Dog) PE=3 SV=1	Olfactory receptor {ECO:0000256|RuleBase:RU000688} OS=Mustela putorius furo (European domestic ferret) PE=3 SV=1	PREDICTED: olfactory receptor 8B3-like [Mustela putorius furo]
gene13703	--	--	Molecular Function: G-protein coupled receptor activity (GO:0004930);; Molecular Function: olfactory receptor activity (GO:0004984);; Cellular Component: plasma membrane (GO:0005886);; Biological Process: G-protein coupled receptor signaling pathway (GO:0007186);; Cellular Component: integral component of membrane (GO:0016021);; Biological Process: detection of chemical stimulus involved in senso…	K04257|2.40403e-177|ecb:100053623|olfactory receptor 9K2-like; K04257 olfactory receptor (A)	--	--	Olfactory receptor-like protein OLF1 OS=Canis familiaris (Dog) PE=3 SV=1	Olfactory receptor {ECO:0000256|RuleBase:RU000688} (Fragment) OS=Mustela putorius furo (European domestic ferret) PE=3 SV=1	PREDICTED: olfactory receptor 9K2-like [Mustela putorius furo]
gene25486	--	--	Molecular Function: G-protein coupled receptor activity (GO:0004930);; Molecular Function: olfactory receptor activity (GO:0004984);; Cellular Component: plasma membrane (GO:0005886);; Biological Process: G-protein coupled receptor signaling pathway (GO:0007186);; Cellular Component: integral component of membrane (GO:0016021);; Biological Process: detection of chemical stimulus involved in senso…	K04257|1.27175e-96|cfa:100687028|olfactory receptor 8B3-like; K04257 olfactory receptor (A)	--	--	Olfactory receptor-like protein OLF1 OS=Canis familiaris (Dog) PE=3 SV=1	Olfactory receptor {ECO:0000256|RuleBase:RU000688} (Fragment) OS=Canis familiaris (Dog) PE=3 SV=1	PREDICTED: olfactory receptor 8B3-like [Canis lupus familiaris]
gene15188	--	--	Molecular Function: transmembrane signaling receptor activity (GO:0004888);; Biological Process: signal transduction (GO:0007165);; Biological Process: sensory perception of smell (GO:0007608);; Cellular Component: membrane (GO:0016020);;	K04257|1.22307e-140|umr:103680620|olfactory receptor 5V1-like; K04257 olfactory receptor (A)	--	--	Olfactory receptor-like protein OLF2 OS=Canis familiaris (Dog) PE=3 SV=1	Olfactory receptor {ECO:0000256|RuleBase:RU000688} (Fragment) OS=Loxodonta africana (African elephant) PE=3 SV=1	PREDICTED: olfactory receptor 5V1-like [Ursus maritimus]
gene4631	--	--	Molecular Function: G-protein coupled receptor activity (GO:0004930);; Molecular Function: olfactory receptor activity (GO:0004984);; Cellular Component: plasma membrane (GO:0005886);; Biological Process: G-protein coupled receptor signaling pathway (GO:0007186);; Cellular Component: integral component of membrane (GO:0016021);; Biological Process: detection of chemical stimulus involved in senso…	K04257|7.54878e-170|ecb:100058198|olfactory receptor 8S1-like; K04257 olfactory receptor (A)	--	--	Olfactory receptor 1G1 GN=OR1G1 OS=Gorilla gorilla gorilla (Lowland gorilla) PE=3 SV=1	Olfactory receptor {ECO:0000256|RuleBase:RU000688} OS=Equus caballus (Horse) PE=3 SV=1	PREDICTED: olfactory receptor 8S1-like [Equus caballus]
gene20303	--	--	Molecular Function: G-protein coupled receptor activity (GO:0004930);; Molecular Function: olfactory receptor activity (GO:0004984);; Cellular Component: plasma membrane (GO:0005886);; Biological Process: G-protein coupled receptor signaling pathway (GO:0007186);; Cellular Component: integral component of membrane (GO:0016021);; Biological Process: detection of chemical stimulus involved in senso…	K04257|1.82149e-165|aml:100470149|olfactory receptor 2H1-like; K04257 olfactory receptor (A)	--	--	Olfactory receptor-like protein OLF3 OS=Canis familiaris (Dog) PE=3 SV=1	Uncharacterized protein {ECO:0000313|Ensembl:ENSBTAP00000048626} (Fragment) OS=Bos taurus (Bovine) PE=4 SV=2	PREDICTED: olfactory receptor 2H1-like [Erinaceus europaeus]
gene22785	--	--	Molecular Function: G-protein coupled receptor activity (GO:0004930);; Molecular Function: olfactory receptor activity (GO:0004984);; Cellular Component: plasma membrane (GO:0005886);; Cellular Component: integral component of membrane (GO:0016021);;	--	--	--	Olfactory receptor 1A1 GN=OR1A1 OS=Pan troglodytes (Chimpanzee) PE=3 SV=1	Olfactory receptor {ECO:0000256|RuleBase:RU000688} (Fragment) OS=Ovis aries (Sheep) PE=3 SV=1	PREDICTED: olfactory receptor 6C2-like [Canis lupus familiaris]
gene19666	--	--	Molecular Function: G-protein coupled receptor activity (GO:0004930);; Molecular Function: olfactory receptor activity (GO:0004984);; Cellular Component: plasma membrane (GO:0005886);; Biological Process: G-protein coupled receptor signaling pathway (GO:0007186);; Cellular Component: integral component of membrane (GO:0016021);; Biological Process: detection of chemical stimulus involved in senso…	K04257|0|cfa:100684755|olfactory receptor 51S1-like; K04257 olfactory receptor (A)	--	--	Olfactory receptor 3A1 GN=OR3A1 OS=Gorilla gorilla gorilla (Lowland gorilla) PE=3 SV=1	Uncharacterized protein {ECO:0000313|Ensembl:ENSCAFP00000032736} (Fragment) OS=Canis familiaris (Dog) PE=4 SV=2	PREDICTED: olfactory receptor 51S1 [Eptesicus fuscus]
gene6989	--	--	--	K04257|1.04085e-113|pps:100979352|olfactory receptor 14A16; K04257 olfactory receptor (A)	--	--	Olfactory receptor 1G1 GN=OR1G1 OS=Gorilla gorilla gorilla (Lowland gorilla) PE=3 SV=1	Olfactory receptor {ECO:0000256|RuleBase:RU000688} OS=Otolemur garnettii (Small-eared galago) PE=3 SV=1	PREDICTED: olfactory receptor 14A16-like [Dasypus novemcinctus]
gene4203	--	--	Molecular Function: G-protein coupled receptor activity (GO:0004930);; Molecular Function: olfactory receptor activity (GO:0004984);; Cellular Component: plasma membrane (GO:0005886);; Biological Process: G-protein coupled receptor signaling pathway (GO:0007186);; Cellular Component: integral component of membrane (GO:0016021);; Biological Process: detection of chemical stimulus involved in senso…	K04257|0|ecb:100067738|olfactory receptor 51A7-like; K04257 olfactory receptor (A)	--	--	Olfactory receptor 3A3 GN=OR3A3 OS=Pan troglodytes (Chimpanzee) PE=3 SV=1	Olfactory receptor {ECO:0000256|RuleBase:RU000688} OS=Equus caballus (Horse) PE=3 SV=1	PREDICTED: olfactory receptor 51A7-like [Equus przewalskii]
gene16410	--	--	Molecular Function: G-protein coupled receptor activity (GO:0004930);; Molecular Function: olfactory receptor activity (GO:0004984);; Cellular Component: plasma membrane (GO:0005886);; Biological Process: G-protein coupled receptor signaling pathway (GO:0007186);; Cellular Component: integral component of membrane (GO:0016021);; Biological Process: detection of chemical stimulus involved in senso…	K04257|0|umr:103672295|olfactory receptor 4B1-like; K04257 olfactory receptor (A)	--	--	Olfactory receptor-like protein OLF1 OS=Canis familiaris (Dog) PE=3 SV=1	Olfactory receptor {ECO:0000256|RuleBase:RU000688} OS=Felis catus (Cat) PE=3 SV=1	PREDICTED: olfactory receptor 4B1-like [Vicugna pacos]
gene23040	--	--	Molecular Function: G-protein coupled receptor activity (GO:0004930);; Molecular Function: olfactory receptor activity (GO:0004984);; Cellular Component: plasma membrane (GO:0005886);; Cellular Component: integral component of membrane (GO:0016021);;	K04257|6.63263e-138|cfa:489313|OR8A1, OR16A10; olfactory receptor, family 8, subfamily A, member 1; K04257 olfactory receptor (A)	--	--	Olfactory receptor-like protein OLF2 OS=Canis familiaris (Dog) PE=3 SV=1	Olfactory receptor {ECO:0000256|RuleBase:RU000688} (Fragment) OS=Canis familiaris (Dog) PE=3 SV=2	PREDICTED: olfactory receptor 8A1 [Canis lupus familiaris]
gene24925	--	--	Molecular Function: G-protein coupled receptor activity (GO:0004930);; Molecular Function: olfactory receptor activity (GO:0004984);; Cellular Component: plasma membrane (GO:0005886);; Biological Process: G-protein coupled receptor signaling pathway (GO:0007186);; Cellular Component: integral component of membrane (GO:0016021);; Biological Process: detection of chemical stimulus involved in senso…	K04257|2.01037e-95|fca:101096915|olfactory receptor 5AN1-like; K04257 olfactory receptor (A)	--	--	Olfactory receptor-like protein OLF1 OS=Canis familiaris (Dog) PE=3 SV=1	Olfactory receptor {ECO:0000256|RuleBase:RU000688} (Fragment) OS=Felis catus (Cat) PE=3 SV=1	PREDICTED: olfactory receptor 5AN1-like [Vicugna pacos]
gene17289	--	--	Molecular Function: G-protein coupled receptor activity (GO:0004930);; Molecular Function: olfactory receptor activity (GO:0004984);; Cellular Component: plasma membrane (GO:0005886);; Biological Process: G-protein coupled receptor signaling pathway (GO:0007186);; Cellular Component: integral component of membrane (GO:0016021);; Biological Process: detection of chemical stimulus involved in senso…	K04257|0|pale:102891899|olfactory receptor 2K2-like; K04257 olfactory receptor (A)	--	--	Olfactory receptor-like protein OLF3 OS=Canis familiaris (Dog) PE=3 SV=1	Olfactory receptor {ECO:0000256|RuleBase:RU000688} OS=Pteropus alecto (Black flying fox) PE=3 SV=1	PREDICTED: olfactory receptor 2K2-like [Pteropus alecto]
gene2194	--	--	Molecular Function: G-protein coupled receptor activity (GO:0004930);; Molecular Function: olfactory receptor activity (GO:0004984);; Cellular Component: plasma membrane (GO:0005886);; Biological Process: G-protein coupled receptor signaling pathway (GO:0007186);; Cellular Component: integral component of membrane (GO:0016021);; Biological Process: detection of chemical stimulus involved in senso…	K04257|0|tup:102499875|olfactory receptor 4K15-like; K04257 olfactory receptor (A)	--	--	Olfactory receptor-like protein OLF3 OS=Canis familiaris (Dog) PE=3 SV=1	Olfactory receptor {ECO:0000256|RuleBase:RU000688} (Fragment) OS=Mustela putorius furo (European domestic ferret) PE=3 SV=1	PREDICTED: olfactory receptor 4K15-like [Tupaia chinensis]
gene15380	[T]	Signal transduction mechanisms	Molecular Function: ion channel activity (GO:0005216);; Biological Process: ion transport (GO:0006811);; Biological Process: sensory perception of smell (GO:0007608);; Cellular Component: integral component of membrane (GO:0016021);; Biological Process: transmembrane transport (GO:0055085);;	K04949|0|umr:103662567|CNGA2; cyclic nucleotide gated channel alpha 2; K04949 cyclic nucleotide gated channel alpha 2 (A)	[PT]	--	Cyclic nucleotide-gated olfactory channel GN=CNGA2 OS=Oryctolagus cuniculus (Rabbit) PE=2 SV=1	Uncharacterized protein {ECO:0000313|Ensembl:ENSOGAP00000015376} OS=Otolemur garnettii (Small-eared galago) PE=4 SV=1	PREDICTED: cyclic nucleotide-gated olfactory channel [Ursus maritimus]
gene15513	--	--	Molecular Function: G-protein coupled receptor activity (GO:0004930);; Molecular Function: olfactory receptor activity (GO:0004984);; Cellular Component: plasma membrane (GO:0005886);; Biological Process: G-protein coupled receptor signaling pathway (GO:0007186);; Cellular Component: integral component of membrane (GO:0016021);; Biological Process: detection of chemical stimulus involved in senso…	K04257|0|fca:101092397|olfactory receptor 4P4-like; K04257 olfactory receptor (A)	--	--	Olfactory receptor 1E2 GN=OR1E2 OS=Pan troglodytes (Chimpanzee) PE=3 SV=1	Olfactory receptor {ECO:0000256|RuleBase:RU000688} OS=Felis catus (Cat) PE=3 SV=1	PREDICTED: olfactory receptor 4P4-like [Odobenus rosmarus divergens]
gene7941	--	--	Molecular Function: transmembrane signaling receptor activity (GO:0004888);; Cellular Component: membrane (GO:0016020);;	K04257|1.46914e-123|umr:103680620|olfactory receptor 5V1-like; K04257 olfactory receptor (A)	--	--	Olfactory receptor 1G1 GN=OR1G1 OS=Gorilla gorilla gorilla (Lowland gorilla) PE=3 SV=1	Olfactory receptor {ECO:0000256|RuleBase:RU000688} OS=Bos mutus PE=3 SV=1	PREDICTED: olfactory receptor 5V1-like [Ursus maritimus]
gene11099	--	--	Molecular Function: G-protein coupled receptor activity (GO:0004930);; Molecular Function: olfactory receptor activity (GO:0004984);; Cellular Component: plasma membrane (GO:0005886);; Biological Process: G-protein coupled receptor signaling pathway (GO:0007186);; Cellular Component: integral component of membrane (GO:0016021);; Biological Process: detection of chemical stimulus involved in senso…	--	--	--	Olfactory receptor-like protein OLF4 OS=Canis familiaris (Dog) PE=3 SV=1	Olfactory receptor {ECO:0000256|RuleBase:RU000688} OS=Otolemur garnettii (Small-eared galago) PE=3 SV=1	PREDICTED: olfactory receptor 51I2-like [Sorex araneus]
gene9148	--	--	Molecular Function: G-protein coupled receptor activity (GO:0004930);; Molecular Function: olfactory receptor activity (GO:0004984);; Cellular Component: plasma membrane (GO:0005886);; Biological Process: G-protein coupled receptor signaling pathway (GO:0007186);; Cellular Component: integral component of membrane (GO:0016021);; Biological Process: detection of chemical stimulus involved in senso…	K04257|1.45675e-154|fca:101101260|olfactory receptor 13D1-like; K04257 olfactory receptor (A)	--	--	Olfactory receptor-like protein OLF3 OS=Canis familiaris (Dog) PE=3 SV=1	Olfactory receptor {ECO:0000256|RuleBase:RU000688} (Fragment) OS=Canis familiaris (Dog) PE=3 SV=1	PREDICTED: olfactory receptor 13D1-like [Ceratotherium simum simum]
gene18103	--	--	Molecular Function: G-protein coupled receptor activity (GO:0004930);; Molecular Function: olfactory receptor activity (GO:0004984);; Cellular Component: plasma membrane (GO:0005886);; Biological Process: G-protein coupled receptor signaling pathway (GO:0007186);; Cellular Component: integral component of membrane (GO:0016021);; Biological Process: detection of chemical stimulus involved in senso…	K04257|0|tup:102486284|olfactory receptor 6C3-like; K04257 olfactory receptor (A)	--	--	Olfactory receptor 3A3 GN=OR3A3 OS=Pan troglodytes (Chimpanzee) PE=3 SV=1	Olfactory receptor {ECO:0000256|RuleBase:RU000688} OS=Canis familiaris (Dog) PE=3 SV=1	PREDICTED: olfactory receptor 6C3-like [Tupaia chinensis]
gene22468	--	--	Molecular Function: transmembrane signaling receptor activity (GO:0004888);; Biological Process: signal transduction (GO:0007165);; Biological Process: sensory perception of smell (GO:0007608);; Cellular Component: membrane (GO:0016020);;	K04257|6.84444e-147|umr:103656272|olfactory receptor 8D1-like; K04257 olfactory receptor (A)	--	--	Olfactory receptor-like protein OLF2 OS=Canis familiaris (Dog) PE=3 SV=1	Uncharacterized protein {ECO:0000313|Ensembl:ENSAMEP00000012654} (Fragment) OS=Ailuropoda melanoleuca (Giant panda) PE=4 SV=1	PREDICTED: olfactory receptor 8D1-like [Ursus maritimus]
gene26439	--	--	Molecular Function: G-protein coupled receptor activity (GO:0004930);; Molecular Function: olfactory receptor activity (GO:0004984);; Cellular Component: plasma membrane (GO:0005886);; Biological Process: G-protein coupled receptor signaling pathway (GO:0007186);; Cellular Component: integral component of membrane (GO:0016021);; Biological Process: detection of chemical stimulus involved in senso…	K04257|9.31658e-146|umr:103662052|olfactory receptor 5K1-like; K04257 olfactory receptor (A)	--	--	Olfactory receptor-like protein OLF1 OS=Canis familiaris (Dog) PE=3 SV=1	Olfactory receptor {ECO:0000256|RuleBase:RU000688} OS=Loxodonta africana (African elephant) PE=3 SV=1	PREDICTED: olfactory receptor 5K1-like [Ceratotherium simum simum]
gene9042	--	--	Molecular Function: G-protein coupled receptor activity (GO:0004930);; Molecular Function: olfactory receptor activity (GO:0004984);; Biological Process: G-protein coupled receptor signaling pathway (GO:0007186);; Cellular Component: integral component of membrane (GO:0016021);; Biological Process: detection of chemical stimulus involved in sensory perception of smell (GO:0050911);;	K04257|1.69035e-125|ecb:100067243|olfactory receptor 51F2-like; K04257 olfactory receptor (A)	--	--	Olfactory receptor 3A3 GN=OR3A3 OS=Pan troglodytes (Chimpanzee) PE=3 SV=1	Olfactory receptor 564 (Predicted) {ECO:0000313|EMBL:ACC62047.1} OS=Rhinolophus ferrumequinum (Greater horseshoe bat) PE=4 SV=1	olfactory receptor 564 (predicted) [Rhinolophus ferrumequinum]
gene7748	--	--	Molecular Function: G-protein coupled receptor activity (GO:0004930);; Molecular Function: olfactory receptor activity (GO:0004984);; Cellular Component: plasma membrane (GO:0005886);; Biological Process: G-protein coupled receptor signaling pathway (GO:0007186);; Cellular Component: integral component of membrane (GO:0016021);; Biological Process: detection of chemical stimulus involved in senso…	K04257|0|ocu:100340326|olfactory receptor 2G3-like; K04257 olfactory receptor (A)	--	--	Olfactory receptor-like protein OLF3 OS=Canis familiaris (Dog) PE=3 SV=1	Olfactory receptor {ECO:0000256|RuleBase:RU000688} OS=Oryctolagus cuniculus (Rabbit) PE=3 SV=1	PREDICTED: olfactory receptor 2G3-like [Erinaceus europaeus]
gene19758	--	--	Molecular Function: G-protein coupled receptor activity (GO:0004930);; Molecular Function: olfactory receptor activity (GO:0004984);; Cellular Component: plasma membrane (GO:0005886);; Biological Process: G-protein coupled receptor signaling pathway (GO:0007186);; Cellular Component: integral component of membrane (GO:0016021);; Biological Process: detection of chemical stimulus involved in senso…	K04257|1.18653e-162|ecb:100058198|olfactory receptor 8S1-like; K04257 olfactory receptor (A)	--	--	Olfactory receptor-like protein OLF4 OS=Canis familiaris (Dog) PE=3 SV=1	Olfactory receptor {ECO:0000256|RuleBase:RU000688} OS=Equus caballus (Horse) PE=3 SV=1	PREDICTED: olfactory receptor 8S1-like [Equus caballus]
gene9132	--	--	Molecular Function: G-protein coupled receptor activity (GO:0004930);; Molecular Function: olfactory receptor activity (GO:0004984);; Cellular Component: plasma membrane (GO:0005886);; Biological Process: G-protein coupled receptor signaling pathway (GO:0007186);; Cellular Component: integral component of membrane (GO:0016021);; Biological Process: detection of chemical stimulus involved in senso…	K04257|0|fca:102899079|olfactory receptor 1D2-like; K04257 olfactory receptor (A)	--	--	Olfactory receptor 1D2 GN=OR1D2 OS=Gorilla gorilla gorilla (Lowland gorilla) PE=3 SV=1	Olfactory receptor {ECO:0000256|RuleBase:RU000688} (Fragment) OS=Felis catus (Cat) PE=3 SV=1	PREDICTED: olfactory receptor 1D2-like [Felis catus]
gene18130	--	--	Molecular Function: G-protein coupled receptor activity (GO:0004930);; Molecular Function: olfactory receptor activity (GO:0004984);; Cellular Component: plasma membrane (GO:0005886);; Biological Process: G-protein coupled receptor signaling pathway (GO:0007186);; Cellular Component: integral component of membrane (GO:0016021);; Biological Process: detection of chemical stimulus involved in senso…	K04257|0|fca:101092291|olfactory receptor 51B2-like; K04257 olfactory receptor (A)	--	--	Olfactory receptor 1E1 GN=OR1E1 OS=Pan troglodytes (Chimpanzee) PE=3 SV=1	Olfactory receptor {ECO:0000256|RuleBase:RU000688} (Fragment) OS=Ailuropoda melanoleuca (Giant panda) PE=3 SV=1	PREDICTED: olfactory receptor 51B2 [Felis catus]
gene14271	--	--	Molecular Function: G-protein coupled receptor activity (GO:0004930);; Molecular Function: olfactory receptor activity (GO:0004984);; Cellular Component: plasma membrane (GO:0005886);; Biological Process: G-protein coupled receptor signaling pathway (GO:0007186);; Cellular Component: integral component of membrane (GO:0016021);; Biological Process: detection of chemical stimulus involved in senso…	K04257|0|ecb:100068286|olfactory receptor 52M1-like; K04257 olfactory receptor (A)	--	--	Olfactory receptor 1E2 GN=OR1E2 OS=Gorilla gorilla gorilla (Lowland gorilla) PE=3 SV=1	Uncharacterized protein {ECO:0000313|Ensembl:ENSECAP00000020258} OS=Equus caballus (Horse) PE=4 SV=1	PREDICTED: olfactory receptor 52M1-like [Equus caballus]
gene3879	--	--	Molecular Function: G-protein coupled receptor activity (GO:0004930);; Molecular Function: olfactory receptor activity (GO:0004984);; Cellular Component: plasma membrane (GO:0005886);; Biological Process: G-protein coupled receptor signaling pathway (GO:0007186);; Cellular Component: integral component of membrane (GO:0016021);; Biological Process: detection of chemical stimulus involved in senso…	K04257|5.54809e-168|ecb:100058198|olfactory receptor 8S1-like; K04257 olfactory receptor (A)	--	--	Olfactory receptor 1E5 GN=OR1E5 OS=Pan troglodytes (Chimpanzee) PE=3 SV=1	Olfactory receptor {ECO:0000256|RuleBase:RU000688} OS=Equus caballus (Horse) PE=3 SV=1	PREDICTED: olfactory receptor 8S1-like [Equus caballus]
gene25689	--	--	--	K04257|0|ocu:100339045|olfactory receptor 4P4-like; K04257 olfactory receptor (A)	--	--	Olfactory receptor-like protein OLF1 OS=Canis familiaris (Dog) PE=3 SV=1	Olfactory receptor {ECO:0000256|RuleBase:RU000688} OS=Oryctolagus cuniculus (Rabbit) PE=3 SV=1	PREDICTED: olfactory receptor 4P4-like [Ceratotherium simum simum]
gene25251	--	--	Molecular Function: G-protein coupled receptor activity (GO:0004930);; Molecular Function: olfactory receptor activity (GO:0004984);; Cellular Component: integral component of membrane (GO:0016021);;	K04257|1.05936e-125|ssc:100518149|olfactory receptor 1L6-like; K04257 olfactory receptor (A)	--	--	Olfactory receptor 1G1 GN=OR1G1 OS=Gorilla gorilla gorilla (Lowland gorilla) PE=3 SV=1	Uncharacterized protein {ECO:0000313|Ensembl:ENSSSCP00000018915} OS=Sus scrofa (Pig) PE=4 SV=2	PREDICTED: olfactory receptor 1L6-like [Sus scrofa]
gene25308	--	--	Molecular Function: G-protein coupled receptor activity (GO:0004930);; Molecular Function: olfactory receptor activity (GO:0004984);; Cellular Component: plasma membrane (GO:0005886);; Cellular Component: integral component of membrane (GO:0016021);;	K04257|1.5171e-100|tup:102489478|olfactory receptor 6C2-like; K04257 olfactory receptor (A)	--	--	Olfactory receptor 1G1 GN=OR1G1 OS=Gorilla gorilla gorilla (Lowland gorilla) PE=3 SV=1	Uncharacterized protein {ECO:0000313|Ensembl:ENSSSCP00000013608} (Fragment) OS=Sus scrofa (Pig) PE=4 SV=2	PREDICTED: olfactory receptor 6C2-like [Mustela putorius furo]
gene25279	--	--	Molecular Function: G-protein coupled receptor activity (GO:0004930);; Molecular Function: olfactory receptor activity (GO:0004984);; Cellular Component: plasma membrane (GO:0005886);; Cellular Component: integral component of membrane (GO:0016021);;	K04257|0|tup:102478853|olfactory receptor 5J2-like; K04257 olfactory receptor (A)	--	--	Olfactory receptor-like protein OLF1 OS=Canis familiaris (Dog) PE=3 SV=1	Olfactory receptor {ECO:0000256|RuleBase:RU000688} OS=Otolemur garnettii (Small-eared galago) PE=3 SV=1	PREDICTED: olfactory receptor 5J2-like [Tupaia chinensis]
gene13398	--	--	Molecular Function: signal transducer activity (GO:0004871);; Cellular Component: membrane (GO:0016020);; Biological Process: single-organism process (GO:0044699);; Biological Process: response to stimulus (GO:0050896);;	K04257|4.84249e-95|ecb:100065637|olfactory receptor 14C36-like; K04257 olfactory receptor (A)	--	--	Olfactory receptor 1G1 GN=OR1G1 OS=Pan troglodytes (Chimpanzee) PE=3 SV=1	Uncharacterized protein {ECO:0000313|Ensembl:ENSLAFP00000025646} OS=Loxodonta africana (African elephant) PE=4 SV=1	PREDICTED: olfactory receptor 14C36-like [Condylura cristata]
gene9428	--	--	Molecular Function: G-protein coupled receptor activity (GO:0004930);; Molecular Function: olfactory receptor activity (GO:0004984);; Cellular Component: plasma membrane (GO:0005886);; Biological Process: G-protein coupled receptor signaling pathway (GO:0007186);; Cellular Component: integral component of membrane (GO:0016021);; Biological Process: detection of chemical stimulus involved in senso…	K04257|1.42897e-163|umr:103662275|olfactory receptor 6M1-like; K04257 olfactory receptor (A)	--	--	Olfactory receptor-like protein DTMT OS=Canis familiaris (Dog) PE=3 SV=1	Olfactory receptor {ECO:0000256|RuleBase:RU000688} (Fragment) OS=Felis catus (Cat) PE=3 SV=1	PREDICTED: olfactory receptor 6M1-like [Ursus maritimus]
gene11102	--	--	Molecular Function: G-protein coupled receptor activity (GO:0004930);; Molecular Function: olfactory receptor activity (GO:0004984);; Cellular Component: plasma membrane (GO:0005886);; Biological Process: G-protein coupled receptor signaling pathway (GO:0007186);; Cellular Component: integral component of membrane (GO:0016021);; Biological Process: detection of chemical stimulus involved in senso…	K04257|0|ecb:100067151|olfactory receptor 51E2-like; K04257 olfactory receptor (A)	--	--	Olfactory receptor 1E2 GN=OR1E2 OS=Gorilla gorilla gorilla (Lowland gorilla) PE=3 SV=1	Olfactory receptor {ECO:0000256|RuleBase:RU000688} OS=Equus caballus (Horse) PE=3 SV=1	PREDICTED: olfactory receptor 51E2-like [Equus caballus]
gene23521	--	--	--	K04257|1.10683e-136|ecb:100068521|olfactory receptor 14C36-like; K04257 olfactory receptor (A)	--	--	Olfactory receptor-like protein OLF1 OS=Canis familiaris (Dog) PE=3 SV=1	Olfactory receptor 14C36-like protein {ECO:0000313|EMBL:EPY85959.1} OS=Camelus ferus (Wild Bactrian camel) PE=4 SV=1	PREDICTED: olfactory receptor 14C36-like [Sorex araneus]
gene17261	--	--	Molecular Function: G-protein coupled receptor activity (GO:0004930);; Molecular Function: olfactory receptor activity (GO:0004984);; Cellular Component: plasma membrane (GO:0005886);; Biological Process: G-protein coupled receptor signaling pathway (GO:0007186);; Cellular Component: integral component of membrane (GO:0016021);; Biological Process: detection of chemical stimulus involved in senso…	K04257|7.81981e-156|cfa:482238|OR2T1, cOR2T23; olfactory receptor, family 2, subfamily T, member 1; K04257 olfactory receptor (A)	--	--	Olfactory receptor-like protein OLF3 OS=Canis familiaris (Dog) PE=3 SV=1	Olfactory receptor {ECO:0000256|RuleBase:RU000688} OS=Bos taurus (Bovine) PE=3 SV=2	PREDICTED: olfactory receptor 2T1 [Canis lupus familiaris]
gene9399	--	--	Molecular Function: G-protein coupled receptor activity (GO:0004930);; Molecular Function: olfactory receptor activity (GO:0004984);; Cellular Component: plasma membrane (GO:0005886);; Biological Process: G-protein coupled receptor signaling pathway (GO:0007186);; Cellular Component: integral component of membrane (GO:0016021);; Biological Process: detection of chemical stimulus involved in senso…	K04257|3.9344e-157|bta:788287|olfactory receptor 2H1; K04257 olfactory receptor (A)	--	--	Olfactory receptor-like protein OLF3 OS=Canis familiaris (Dog) PE=3 SV=1	Uncharacterized protein {ECO:0000313|Ensembl:ENSBTAP00000048626} (Fragment) OS=Bos taurus (Bovine) PE=4 SV=2	PREDICTED: olfactory receptor 2H1-like [Condylura cristata]
gene16379	--	--	Molecular Function: G-protein coupled receptor activity (GO:0004930);; Molecular Function: olfactory receptor activity (GO:0004984);; Cellular Component: plasma membrane (GO:0005886);; Biological Process: G-protein coupled receptor signaling pathway (GO:0007186);; Cellular Component: integral component of membrane (GO:0016021);; Biological Process: detection of chemical stimulus involved in senso…	K04257|0|ssc:100154719|olfactory receptor 6C2-like; K04257 olfactory receptor (A)	--	--	Olfactory receptor-like protein OLF3 OS=Canis familiaris (Dog) PE=3 SV=1	Olfactory receptor {ECO:0000256|RuleBase:RU000688} OS=Gorilla gorilla gorilla (Lowland gorilla) PE=3 SV=1	PREDICTED: olfactory receptor 6C2-like [Elephantulus edwardii]
gene19150	--	--	Molecular Function: G-protein coupled receptor activity (GO:0004930);; Molecular Function: olfactory receptor activity (GO:0004984);; Cellular Component: plasma membrane (GO:0005886);; Biological Process: G-protein coupled receptor signaling pathway (GO:0007186);; Cellular Component: integral component of membrane (GO:0016021);; Biological Process: detection of chemical stimulus involved in senso…	K04257|5.31747e-171|mcc:707944|olfactory receptor 1020-like; K04257 olfactory receptor (A)	--	--	Olfactory receptor-like protein OLF1 OS=Canis familiaris (Dog) PE=3 SV=1	Olfactory receptor {ECO:0000256|RuleBase:RU000688} OS=Macaca fascicularis (Crab-eating macaque) PE=3 SV=1	PREDICTED: olfactory receptor 5I1-like [Eptesicus fuscus]
gene20777	--	--	Molecular Function: transmembrane signaling receptor activity (GO:0004888);; Cellular Component: membrane (GO:0016020);; Biological Process: single-organism process (GO:0044699);; Biological Process: response to stimulus (GO:0050896);;	K04257|4.34717e-56|tup:102477257|olfactory receptor 5AN1-like; K04257 olfactory receptor (A)	--	--	Olfactory receptor-like protein OLF2 OS=Canis familiaris (Dog) PE=3 SV=1	Olfactory receptor {ECO:0000256|RuleBase:RU000688} OS=Tupaia chinensis (Chinese tree shrew) PE=3 SV=1	PREDICTED: olfactory receptor 5AN1-like [Vicugna pacos]
gene25306	--	--	Molecular Function: G-protein coupled receptor activity (GO:0004930);; Molecular Function: olfactory receptor activity (GO:0004984);; Cellular Component: plasma membrane (GO:0005886);; Biological Process: G-protein coupled receptor signaling pathway (GO:0007186);; Cellular Component: integral component of membrane (GO:0016021);; Biological Process: detection of chemical stimulus involved in senso…	K04257|0|ptg:102969288|olfactory receptor 5AP2-like; K04257 olfactory receptor (A)	--	--	Olfactory receptor-like protein OLF2 OS=Canis familiaris (Dog) PE=3 SV=1	Olfactory receptor {ECO:0000256|RuleBase:RU000688} OS=Myotis lucifugus (Little brown bat) PE=3 SV=1	PREDICTED: olfactory receptor 5AP2-like [Panthera tigris altaica]
gene18030	--	--	Molecular Function: G-protein coupled receptor activity (GO:0004930);; Molecular Function: olfactory receptor activity (GO:0004984);; Cellular Component: plasma membrane (GO:0005886);; Biological Process: G-protein coupled receptor signaling pathway (GO:0007186);; Cellular Component: integral component of membrane (GO:0016021);; Biological Process: detection of chemical stimulus involved in senso…	K04257|4.3348e-157|cfa:100685816|putative olfactory receptor 56B2-like; K04257 olfactory receptor (A)	--	--	Olfactory receptor-like protein OLF3 OS=Canis familiaris (Dog) PE=3 SV=1	Uncharacterized protein {ECO:0000313|Ensembl:ENSAMEP00000020366} OS=Ailuropoda melanoleuca (Giant panda) PE=4 SV=1	PREDICTED: putative olfactory receptor 56B2-like [Canis lupus familiaris]
gene11502	--	--	Molecular Function: G-protein coupled receptor activity (GO:0004930);; Molecular Function: olfactory receptor activity (GO:0004984);; Cellular Component: plasma membrane (GO:0005886);; Biological Process: G-protein coupled receptor signaling pathway (GO:0007186);; Cellular Component: integral component of membrane (GO:0016021);; Biological Process: detection of chemical stimulus involved in senso…	K04257|0|ssc:100512910|olfactory receptor 10G3-like; K04257 olfactory receptor (A)	--	--	Olfactory receptor-like protein OLF3 OS=Canis familiaris (Dog) PE=3 SV=1	Olfactory receptor MOR223-6-like isoform 1 {ECO:0000313|EMBL:EPY76522.1} OS=Camelus ferus (Wild Bactrian camel) PE=4 SV=1	PREDICTED: olfactory receptor 10G3-like [Sus scrofa]
gene25500	--	--	--	K04257|5.28967e-140|pon:100450398|olfactory receptor 14I1-like; K04257 olfactory receptor (A)	--	--	Olfactory receptor 1E2 GN=OR1E2 OS=Pan troglodytes (Chimpanzee) PE=3 SV=1	Olfactory receptor {ECO:0000256|RuleBase:RU000688} OS=Sarcophilus harrisii (Tasmanian devil) PE=3 SV=1	PREDICTED: olfactory receptor 14I1-like [Galeopterus variegatus]
gene14820	--	--	--	K04257|0|umr:103656611|olfactory receptor 4K15-like; K04257 olfactory receptor (A)	--	--	Olfactory receptor 1A1 GN=OR1A1 OS=Pan troglodytes (Chimpanzee) PE=3 SV=1	Olfactory receptor {ECO:0000256|RuleBase:RU000688} OS=Mustela putorius furo (European domestic ferret) PE=3 SV=1	PREDICTED: olfactory receptor 4K15-like [Ursus maritimus]
gene14426	--	--	Molecular Function: G-protein coupled receptor activity (GO:0004930);; Molecular Function: olfactory receptor activity (GO:0004984);; Cellular Component: plasma membrane (GO:0005886);; Biological Process: G-protein coupled receptor signaling pathway (GO:0007186);; Cellular Component: integral component of membrane (GO:0016021);; Biological Process: detection of chemical stimulus involved in senso…	K04257|5.99882e-171|ecb:100056713|olfactory receptor 4D10-like; K04257 olfactory receptor (A)	--	--	Olfactory receptor 1G1 GN=OR1G1 OS=Gorilla gorilla gorilla (Lowland gorilla) PE=3 SV=1	Olfactory receptor {ECO:0000256|RuleBase:RU000688} OS=Canis familiaris (Dog) PE=3 SV=1	PREDICTED: olfactory receptor 4D10 [Equus przewalskii]
gene1508	--	--	Molecular Function: G-protein coupled receptor activity (GO:0004930);; Molecular Function: olfactory receptor activity (GO:0004984);; Cellular Component: plasma membrane (GO:0005886);; Biological Process: G-protein coupled receptor signaling pathway (GO:0007186);; Cellular Component: integral component of membrane (GO:0016021);; Biological Process: detection of chemical stimulus involved in senso…	K04257|1.06096e-143|ptg:102968136|olfactory receptor 1J4-like; K04257 olfactory receptor (A)	--	--	Olfactory receptor 1E5 GN=OR1E5 OS=Pan troglodytes (Chimpanzee) PE=3 SV=1	Olfactory receptor {ECO:0000256|RuleBase:RU000688} OS=Camelus ferus (Wild Bactrian camel) PE=3 SV=1	PREDICTED: olfactory receptor 1J4-like [Vicugna pacos]
gene15776	--	--	Molecular Function: G-protein coupled receptor activity (GO:0004930);; Molecular Function: olfactory receptor activity (GO:0004984);; Cellular Component: plasma membrane (GO:0005886);; Biological Process: G-protein coupled receptor signaling pathway (GO:0007186);; Cellular Component: integral component of membrane (GO:0016021);; Biological Process: detection of chemical stimulus involved in senso…	K04257|6.03425e-63|oas:101118049|olfactory receptor 4P4-like; K04257 olfactory receptor (A)	--	--	Olfactory receptor-like protein OLF2 OS=Canis familiaris (Dog) PE=3 SV=1	Uncharacterized protein {ECO:0000313|Ensembl:ENSAMEP00000021144} OS=Ailuropoda melanoleuca (Giant panda) PE=3 SV=1	PREDICTED: olfactory receptor 4P4-like [Mustela putorius furo]
gene11332	--	--	Molecular Function: G-protein coupled receptor activity (GO:0004930);; Molecular Function: olfactory receptor activity (GO:0004984);; Cellular Component: plasma membrane (GO:0005886);; Biological Process: G-protein coupled receptor signaling pathway (GO:0007186);; Cellular Component: integral component of membrane (GO:0016021);; Biological Process: detection of chemical stimulus involved in senso…	K04257|0|ptg:102969463|olfactory receptor 2AG2-like; K04257 olfactory receptor (A)	--	--	Olfactory receptor-like protein OLF3 OS=Canis familiaris (Dog) PE=3 SV=1	Olfactory receptor 2AG1 {ECO:0000313|EMBL:EPQ12483.1} OS=Myotis brandtii (Brandt's bat) PE=4 SV=1	PREDICTED: olfactory receptor 2AG2-like [Panthera tigris altaica]
gene3428	--	--	Molecular Function: G-protein coupled receptor activity (GO:0004930);; Molecular Function: olfactory receptor activity (GO:0004984);; Cellular Component: plasma membrane (GO:0005886);; Cellular Component: integral component of membrane (GO:0016021);;	K04257|3.67512e-173|umr:103680620|olfactory receptor 5V1-like; K04257 olfactory receptor (A)	--	--	Olfactory receptor-like protein OLF3 OS=Canis familiaris (Dog) PE=3 SV=1	Olfactory receptor {ECO:0000256|RuleBase:RU000688} OS=Bos mutus PE=3 SV=1	PREDICTED: olfactory receptor 5V1-like [Ursus maritimus]
gene1513	--	--	Molecular Function: G-protein coupled receptor activity (GO:0004930);; Molecular Function: olfactory receptor activity (GO:0004984);; Cellular Component: plasma membrane (GO:0005886);; Biological Process: G-protein coupled receptor signaling pathway (GO:0007186);; Cellular Component: integral component of membrane (GO:0016021);; Biological Process: detection of chemical stimulus involved in senso…	K04257|5.68785e-169|aml:100483648|olfactory receptor 1J1-like; K04257 olfactory receptor (A)	--	--	Olfactory receptor 1E5 GN=OR1E5 OS=Pan troglodytes (Chimpanzee) PE=3 SV=1	Olfactory receptor {ECO:0000256|RuleBase:RU000688} (Fragment) OS=Ailuropoda melanoleuca (Giant panda) PE=3 SV=1	hypothetical protein PANDA_021244 [Ailuropoda melanoleuca]
gene13266	--	--	Molecular Function: signal transducer activity (GO:0004871);; Cellular Component: membrane (GO:0016020);; Biological Process: single-organism process (GO:0044699);; Biological Process: response to stimulus (GO:0050896);;	K04257|1.24578e-102|ecb:100058123|olfactory receptor 10AG1-like; K04257 olfactory receptor (A)	--	--	Olfactory receptor 1E2 GN=OR1E2 OS=Gorilla gorilla gorilla (Lowland gorilla) PE=3 SV=1	Olfactory receptor {ECO:0000256|RuleBase:RU000688} OS=Equus caballus (Horse) PE=3 SV=1	PREDICTED: olfactory receptor 10AG1-like [Equus caballus]
gene26387	--	--	Molecular Function: G-protein coupled receptor activity (GO:0004930);; Molecular Function: olfactory receptor activity (GO:0004984);; Cellular Component: plasma membrane (GO:0005886);; Biological Process: G-protein coupled receptor signaling pathway (GO:0007186);; Cellular Component: integral component of membrane (GO:0016021);; Biological Process: detection of chemical stimulus involved in senso…	K04257|0|umr:103666052|olfactory receptor 5W2-like; K04257 olfactory receptor (A)	--	--	Olfactory receptor-like protein OLF2 OS=Canis familiaris (Dog) PE=3 SV=1	Olfactory receptor {ECO:0000256|RuleBase:RU000688} (Fragment) OS=Ailuropoda melanoleuca (Giant panda) PE=3 SV=1	PREDICTED: olfactory receptor 5W2-like [Ursus maritimus]
gene341	--	--	Molecular Function: G-protein coupled receptor activity (GO:0004930);; Molecular Function: olfactory receptor activity (GO:0004984);; Cellular Component: plasma membrane (GO:0005886);; Cellular Component: cell cortex (GO:0005938);; Biological Process: G-protein coupled receptor signaling pathway (GO:0007186);; Cellular Component: integral component of membrane (GO:0016021);; Biological Process: d…	K04257|0|tup:102471228|olfactory receptor 15-like; K04257 olfactory receptor (A)	--	--	Olfactory receptor-like protein OLF3 OS=Canis familiaris (Dog) PE=3 SV=1	Olfactory receptor {ECO:0000256|RuleBase:RU000688} OS=Tupaia chinensis (Chinese tree shrew) PE=3 SV=1	PREDICTED: olfactory receptor 15-like [Tupaia chinensis]
gene12363	--	--	--	K04257|3.29535e-168|umr:103680620|olfactory receptor 5V1-like; K04257 olfactory receptor (A)	--	--	Olfactory receptor 1G1 GN=OR1G1 OS=Gorilla gorilla gorilla (Lowland gorilla) PE=3 SV=1	Olfactory receptor {ECO:0000256|RuleBase:RU000688} OS=Bos mutus PE=3 SV=1	PREDICTED: olfactory receptor 5V1-like [Ursus maritimus]
gene25818	--	--	--	K04257|0|pale:102886926|olfactory receptor 8J1-like; K04257 olfactory receptor (A)	--	--	Olfactory receptor-like protein OLF1 OS=Canis familiaris (Dog) PE=3 SV=1	Olfactory receptor {ECO:0000256|RuleBase:RU000688} OS=Felis catus (Cat) PE=3 SV=1	PREDICTED: olfactory receptor 8J1-like [Pteropus alecto]
gene18544	--	--	Molecular Function: G-protein coupled receptor activity (GO:0004930);; Molecular Function: olfactory receptor activity (GO:0004984);; Cellular Component: plasma membrane (GO:0005886);; Biological Process: G-protein coupled receptor signaling pathway (GO:0007186);; Cellular Component: integral component of membrane (GO:0016021);; Biological Process: detection of chemical stimulus involved in senso…	K04257|3.20801e-180|ssc:100517605|olfactory receptor 3A1-like; K04257 olfactory receptor (A)	--	--	Olfactory receptor 3A1 GN=OR3A1 OS=Pan troglodytes (Chimpanzee) PE=3 SV=1	Olfactory receptor {ECO:0000256|RuleBase:RU000688} (Fragment) OS=Sus scrofa (Pig) PE=3 SV=1	PREDICTED: olfactory receptor 3A1-like [Sus scrofa]
gene11468	--	--	Molecular Function: G-protein coupled receptor activity (GO:0004930);; Molecular Function: olfactory receptor activity (GO:0004984);; Cellular Component: plasma membrane (GO:0005886);; Biological Process: G-protein coupled receptor signaling pathway (GO:0007186);; Cellular Component: integral component of membrane (GO:0016021);; Biological Process: detection of chemical stimulus involved in senso…	K04257|0|ocu:100355136|olfactory receptor 10T2; K04257 olfactory receptor (A)	--	--	Olfactory receptor-like protein OLF3 OS=Canis familiaris (Dog) PE=3 SV=1	Olfactory receptor {ECO:0000256|RuleBase:RU000688} (Fragment) OS=Mustela putorius furo (European domestic ferret) PE=3 SV=1	PREDICTED: olfactory receptor 10T2-like [Elephantulus edwardii]
gene26435	--	--	Molecular Function: G-protein coupled receptor activity (GO:0004930);; Molecular Function: olfactory receptor activity (GO:0004984);; Cellular Component: plasma membrane (GO:0005886);; Biological Process: G-protein coupled receptor signaling pathway (GO:0007186);; Cellular Component: integral component of membrane (GO:0016021);; Biological Process: detection of chemical stimulus involved in senso…	K04257|2.32729e-152|ptg:102954174|olfactory receptor 52L1-like; K04257 olfactory receptor (A)	--	--	Olfactory receptor 3A3 GN=OR3A3 OS=Pan troglodytes (Chimpanzee) PE=3 SV=1	Olfactory receptor {ECO:0000256|RuleBase:RU000688} (Fragment) OS=Felis catus (Cat) PE=3 SV=1	PREDICTED: olfactory receptor 52L1-like [Panthera tigris altaica]
gene10358	--	--	Molecular Function: G-protein coupled receptor activity (GO:0004930);; Molecular Function: olfactory receptor activity (GO:0004984);; Cellular Component: plasma membrane (GO:0005886);; Biological Process: G-protein coupled receptor signaling pathway (GO:0007186);; Cellular Component: integral component of membrane (GO:0016021);; Biological Process: detection of chemical stimulus involved in senso…	K04257|4.41714e-142|tup:102497447|olfactory receptor 5F1-like; K04257 olfactory receptor (A)	--	--	Olfactory receptor-like protein OLF2 OS=Canis familiaris (Dog) PE=3 SV=1	Uncharacterized protein {ECO:0000313|Ensembl:ENSLAFP00000018954} OS=Loxodonta africana (African elephant) PE=4 SV=1	PREDICTED: olfactory receptor 5F1-like [Mustela putorius furo]
gene19669	--	--	Molecular Function: G-protein coupled receptor activity (GO:0004930);; Molecular Function: olfactory receptor activity (GO:0004984);; Cellular Component: plasma membrane (GO:0005886);; Biological Process: G-protein coupled receptor signaling pathway (GO:0007186);; Cellular Component: integral component of membrane (GO:0016021);; Biological Process: detection of chemical stimulus involved in senso…	K04257|0|cfa:100684107|olfactory receptor 51F1-like; K04257 olfactory receptor (A)	--	--	Olfactory receptor 3A2 GN=OR3A2 OS=Gorilla gorilla gorilla (Lowland gorilla) PE=3 SV=1	Olfactory receptor {ECO:0000256|RuleBase:RU000688} OS=Mustela putorius furo (European domestic ferret) PE=3 SV=1	PREDICTED: olfactory receptor 51F1-like [Mustela putorius furo]
gene14463	--	--	Molecular Function: G-protein coupled receptor activity (GO:0004930);; Molecular Function: olfactory receptor activity (GO:0004984);; Cellular Component: plasma membrane (GO:0005886);; Biological Process: G-protein coupled receptor signaling pathway (GO:0007186);; Cellular Component: integral component of membrane (GO:0016021);; Biological Process: detection of chemical stimulus involved in senso…	K04257|2.45259e-137|ecb:100072473|olfactory receptor 4N2-like; K04257 olfactory receptor (A)	--	--	Olfactory receptor 1G1 GN=OR1G1 OS=Gorilla gorilla gorilla (Lowland gorilla) PE=3 SV=1	Olfactory receptor {ECO:0000256|RuleBase:RU000688} OS=Equus caballus (Horse) PE=3 SV=1	PREDICTED: olfactory receptor 4N2-like [Equus caballus]
gene18077	--	--	Molecular Function: G-protein coupled receptor activity (GO:0004930);; Molecular Function: olfactory receptor activity (GO:0004984);; Cellular Component: plasma membrane (GO:0005886);; Cellular Component: integral component of membrane (GO:0016021);;	K04257|3.87962e-168|tup:102489478|olfactory receptor 6C2-like; K04257 olfactory receptor (A)	--	--	Olfactory receptor 1G1 GN=OR1G1 OS=Gorilla gorilla gorilla (Lowland gorilla) PE=3 SV=1	Olfactory receptor {ECO:0000256|RuleBase:RU000688} OS=Tupaia chinensis (Chinese tree shrew) PE=3 SV=1	PREDICTED: olfactory receptor 6C2-like [Mustela putorius furo]
gene21565	--	--	Molecular Function: G-protein coupled receptor activity (GO:0004930);; Molecular Function: olfactory receptor activity (GO:0004984);; Cellular Component: plasma membrane (GO:0005886);; Biological Process: G-protein coupled receptor signaling pathway (GO:0007186);; Cellular Component: integral component of membrane (GO:0016021);; Biological Process: detection of chemical stimulus involved in senso…	K04257|7.07464e-109|ptg:102963119|olfactory receptor 9G4-like; K04257 olfactory receptor (A)	--	--	Olfactory receptor-like protein OLF1 OS=Canis familiaris (Dog) PE=3 SV=1	Olfactory receptor {ECO:0000256|RuleBase:RU000688} (Fragment) OS=Canis familiaris (Dog) PE=3 SV=1	PREDICTED: olfactory receptor 9G4-like [Panthera tigris altaica]
gene18585	--	--	Molecular Function: G-protein coupled receptor activity (GO:0004930);; Molecular Function: olfactory receptor activity (GO:0004984);; Cellular Component: plasma membrane (GO:0005886);; Cellular Component: integral component of membrane (GO:0016021);;	--	--	--	Olfactory receptor 1A1 GN=OR1A1 OS=Pan troglodytes (Chimpanzee) PE=3 SV=1	Olfactory receptor {ECO:0000256|RuleBase:RU000688} (Fragment) OS=Bos taurus (Bovine) PE=3 SV=1	PREDICTED: olfactory receptor 6C2-like [Ceratotherium simum simum]
gene7877	--	--	Molecular Function: G-protein coupled receptor activity (GO:0004930);; Molecular Function: olfactory receptor activity (GO:0004984);; Cellular Component: plasma membrane (GO:0005886);; Cellular Component: integral component of membrane (GO:0016021);;	K04257|6.31669e-166|chx:102180464|olfactory receptor 10P1-like; K04257 olfactory receptor (A)	--	--	Olfactory receptor-like protein OLF3 OS=Canis familiaris (Dog) PE=3 SV=1	Olfactory receptor {ECO:0000256|RuleBase:RU000688} OS=Ovis aries (Sheep) PE=3 SV=1	PREDICTED: olfactory receptor 10P1-like [Capra hircus]
gene11160	--	--	Molecular Function: transmembrane signaling receptor activity (GO:0004888);; Biological Process: signal transduction (GO:0007165);; Biological Process: sensory perception of smell (GO:0007608);; Cellular Component: membrane (GO:0016020);;	K04257|1.13145e-141|umr:103680617|olfactory receptor 14A2-like; K04257 olfactory receptor (A)	--	--	Olfactory receptor 1G1 GN=OR1G1 OS=Gorilla gorilla gorilla (Lowland gorilla) PE=3 SV=1	Olfactory receptor {ECO:0000256|RuleBase:RU000688} OS=Macaca fascicularis (Crab-eating macaque) PE=3 SV=1	PREDICTED: olfactory receptor 14A2-like [Ursus maritimus]
gene12434	--	--	Molecular Function: G-protein coupled receptor activity (GO:0004930);; Molecular Function: olfactory receptor activity (GO:0004984);; Cellular Component: plasma membrane (GO:0005886);; Biological Process: G-protein coupled receptor signaling pathway (GO:0007186);; Cellular Component: integral component of membrane (GO:0016021);; Biological Process: detection of chemical stimulus involved in senso…	K04257|1.08936e-170|aml:100468276|olfactory receptor 8K3-like; K04257 olfactory receptor (A)	--	--	Olfactory receptor-like protein OLF2 OS=Canis familiaris (Dog) PE=3 SV=1	Uncharacterized protein {ECO:0000313|Ensembl:ENSAMEP00000021051} (Fragment) OS=Ailuropoda melanoleuca (Giant panda) PE=4 SV=1	hypothetical protein PANDA_016629 [Ailuropoda melanoleuca]
gene25582	--	--	Molecular Function: G-protein coupled receptor activity (GO:0004930);; Molecular Function: olfactory receptor activity (GO:0004984);; Cellular Component: plasma membrane (GO:0005886);; Biological Process: G-protein coupled receptor signaling pathway (GO:0007186);; Cellular Component: integral component of membrane (GO:0016021);; Biological Process: detection of chemical stimulus involved in senso…	K04257|1.8761e-77|fca:101097171|olfactory receptor 5AN1-like; K04257 olfactory receptor (A)	--	--	Olfactory receptor-like protein OLF2 OS=Canis familiaris (Dog) PE=3 SV=1	Olfactory receptor {ECO:0000256|RuleBase:RU000688} OS=Felis catus (Cat) PE=3 SV=1	PREDICTED: olfactory receptor 5AN1-like [Felis catus]
gene23741	--	--	Molecular Function: G-protein coupled receptor activity (GO:0004930);; Molecular Function: olfactory receptor activity (GO:0004984);; Cellular Component: plasma membrane (GO:0005886);; Biological Process: G-protein coupled receptor signaling pathway (GO:0007186);; Cellular Component: integral component of membrane (GO:0016021);; Biological Process: detection of chemical stimulus involved in senso…	--	--	--	Olfactory receptor 1E1 GN=OR1E1 OS=Pan troglodytes (Chimpanzee) PE=3 SV=1	Olfactory receptor {ECO:0000256|RuleBase:RU000688} OS=Equus caballus (Horse) PE=3 SV=1	PREDICTED: olfactory receptor 52B4-like [Equus caballus]
gene25161	--	--	Molecular Function: G-protein coupled receptor activity (GO:0004930);; Molecular Function: olfactory receptor activity (GO:0004984);; Cellular Component: plasma membrane (GO:0005886);; Biological Process: G-protein coupled receptor signaling pathway (GO:0007186);; Cellular Component: integral component of membrane (GO:0016021);; Biological Process: detection of chemical stimulus involved in senso…	K04257|0|cfa:489343|cOR10G11; cOR10G11 olfactory receptor family 10 subfamily G-like; K04257 olfactory receptor (A)	--	--	Olfactory receptor-like protein OLF3 OS=Canis familiaris (Dog) PE=3 SV=1	Uncharacterized protein {ECO:0000313|Ensembl:ENSCAFP00000016766} (Fragment) OS=Canis familiaris (Dog) PE=4 SV=2	PREDICTED: olfactory receptor 10G6 [Canis lupus familiaris]
gene4242	--	--	Molecular Function: G-protein coupled receptor activity (GO:0004930);; Molecular Function: olfactory receptor activity (GO:0004984);; Cellular Component: plasma membrane (GO:0005886);; Biological Process: G-protein coupled receptor signaling pathway (GO:0007186);; Cellular Component: integral component of membrane (GO:0016021);; Biological Process: detection of chemical stimulus involved in senso…	K04257|3.58245e-119|umr:103656332|olfactory receptor 2T11; K04257 olfactory receptor (A)	--	--	Olfactory receptor-like protein OLF3 OS=Canis familiaris (Dog) PE=3 SV=1	Olfactory receptor {ECO:0000256|RuleBase:RU000688} OS=Canis familiaris (Dog) PE=3 SV=2	PREDICTED: olfactory receptor 2T11 [Ursus maritimus]
gene5550	--	--	Molecular Function: G-protein coupled receptor activity (GO:0004930);; Molecular Function: olfactory receptor activity (GO:0004984);; Cellular Component: plasma membrane (GO:0005886);; Biological Process: G-protein coupled receptor signaling pathway (GO:0007186);; Cellular Component: integral component of membrane (GO:0016021);; Biological Process: detection of chemical stimulus involved in senso…	K04257|0|umr:103680059|olfactory receptor 51I2-like; K04257 olfactory receptor (A)	--	--	Olfactory receptor 3A2 GN=OR3A2 OS=Gorilla gorilla gorilla (Lowland gorilla) PE=3 SV=1	Olfactory receptor {ECO:0000256|RuleBase:RU000688} OS=Ailuropoda melanoleuca (Giant panda) PE=3 SV=1	PREDICTED: olfactory receptor 51I2-like [Ursus maritimus]
gene19700	--	--	Molecular Function: G-protein coupled receptor activity (GO:0004930);; Molecular Function: olfactory receptor activity (GO:0004984);; Cellular Component: plasma membrane (GO:0005886);; Biological Process: G-protein coupled receptor signaling pathway (GO:0007186);; Cellular Component: integral component of membrane (GO:0016021);; Biological Process: detection of chemical stimulus involved in senso…	K04257|0|cfa:100685491|olfactory receptor 52D1-like; K04257 olfactory receptor (A)	--	--	Olfactory receptor 1D2 GN=OR1D2 OS=Pan troglodytes (Chimpanzee) PE=3 SV=1	Olfactory receptor {ECO:0000256|RuleBase:RU000688} OS=Canis familiaris (Dog) PE=3 SV=1	PREDICTED: olfactory receptor 52D1 [Canis lupus familiaris]
gene22429	--	--	Molecular Function: transmembrane signaling receptor activity (GO:0004888);; Biological Process: signal transduction (GO:0007165);; Biological Process: sensory perception of smell (GO:0007608);; Cellular Component: membrane (GO:0016020);;	K04257|1.95191e-106|umr:103680617|olfactory receptor 14A2-like; K04257 olfactory receptor (A)	--	--	Olfactory receptor-like protein OLF1 OS=Canis familiaris (Dog) PE=3 SV=1	Olfactory receptor {ECO:0000256|RuleBase:RU000688} OS=Macaca fascicularis (Crab-eating macaque) PE=3 SV=1	PREDICTED: olfactory receptor 14A2-like [Ursus maritimus]
gene25441	--	--	Molecular Function: G-protein coupled receptor activity (GO:0004930);; Molecular Function: olfactory receptor activity (GO:0004984);; Cellular Component: plasma membrane (GO:0005886);; Biological Process: G-protein coupled receptor signaling pathway (GO:0007186);; Cellular Component: integral component of membrane (GO:0016021);; Biological Process: detection of chemical stimulus involved in senso…	K04257|0|myb:102240329|olfactory receptor 4C15-like; K04257 olfactory receptor (A)	--	--	Olfactory receptor-like protein OLF1 OS=Canis familiaris (Dog) PE=3 SV=1	Olfactory receptor {ECO:0000256|RuleBase:RU000688} OS=Myotis brandtii (Brandt's bat) PE=3 SV=1	PREDICTED: olfactory receptor 4C15-like [Myotis brandtii]
gene18452	--	--	Molecular Function: G-protein coupled receptor activity (GO:0004930);; Molecular Function: olfactory receptor activity (GO:0004984);; Cellular Component: plasma membrane (GO:0005886);; Cellular Component: integral component of membrane (GO:0016021);;	K04257|6.26144e-73|ssc:100157944|olfactory receptor 6C74-like; K04257 olfactory receptor (A)	--	--	Olfactory receptor-like protein OLF3 OS=Canis familiaris (Dog) PE=3 SV=1	Olfactory receptor {ECO:0000256|RuleBase:RU000688} OS=Sus scrofa (Pig) PE=3 SV=1	PREDICTED: olfactory receptor 6C74-like [Sus scrofa]
gene25957	--	--	--	K04257|0|cfa:481647|COR13C13; olfactory receptor family 13 subfamily C; K04257 olfactory receptor (A)	--	--	Olfactory receptor-like protein OLF3 OS=Canis familiaris (Dog) PE=3 SV=1	Olfactory receptor {ECO:0000256|RuleBase:RU000688} OS=Canis familiaris (Dog) PE=3 SV=1	PREDICTED: putative olfactory receptor ENSP00000348552-like [Vicugna pacos]
gene23304	--	--	Molecular Function: transmembrane signaling receptor activity (GO:0004888);; Cellular Component: membrane (GO:0016020);;	K04257|3.17555e-157|ecb:100073309|olfactory receptor 1019-like; K04257 olfactory receptor (A)	--	--	Olfactory receptor-like protein OLF1 OS=Canis familiaris (Dog) PE=3 SV=1	Olfactory receptor {ECO:0000256|RuleBase:RU000688} OS=Equus caballus (Horse) PE=3 SV=1	PREDICTED: olfactory receptor 1019-like [Equus caballus]
gene25098	--	--	Molecular Function: G-protein coupled receptor activity (GO:0004930);; Molecular Function: olfactory receptor activity (GO:0004984);; Cellular Component: plasma membrane (GO:0005886);; Biological Process: G-protein coupled receptor signaling pathway (GO:0007186);; Cellular Component: integral component of membrane (GO:0016021);; Biological Process: detection of chemical stimulus involved in senso…	K04257|0|ptg:102967540|olfactory receptor 145-like; K04257 olfactory receptor (A)	--	--	Olfactory receptor-like protein OLF2 OS=Canis familiaris (Dog) PE=3 SV=1	Olfactory receptor {ECO:0000256|RuleBase:RU000688} OS=Canis familiaris (Dog) PE=3 SV=2	PREDICTED: olfactory receptor 145-like [Panthera tigris altaica]
gene22942	--	--	Molecular Function: G-protein coupled receptor activity (GO:0004930);; Molecular Function: olfactory receptor activity (GO:0004984);; Cellular Component: plasma membrane (GO:0005886);; Biological Process: G-protein coupled receptor signaling pathway (GO:0007186);; Cellular Component: integral component of membrane (GO:0016021);; Biological Process: detection of chemical stimulus involved in senso…	K04257|1.07564e-99|aml:100466216|olfactory receptor 5W2-like; K04257 olfactory receptor (A)	--	--	Olfactory receptor-like protein OLF2 OS=Canis familiaris (Dog) PE=3 SV=1	Olfactory receptor {ECO:0000256|RuleBase:RU000688} (Fragment) OS=Ailuropoda melanoleuca (Giant panda) PE=3 SV=1	PREDICTED: olfactory receptor 5W2-like, partial [Ceratotherium simum simum]
gene21419	--	--	Molecular Function: G-protein coupled receptor activity (GO:0004930);; Molecular Function: olfactory receptor activity (GO:0004984);; Cellular Component: plasma membrane (GO:0005886);; Biological Process: G-protein coupled receptor signaling pathway (GO:0007186);; Cellular Component: integral component of membrane (GO:0016021);; Biological Process: detection of chemical stimulus involved in senso…	K04257|0|pale:102879924|olfactory receptor 52J3-like; K04257 olfactory receptor (A)	--	--	Olfactory receptor 1D2 GN=OR1D2 OS=Gorilla gorilla gorilla (Lowland gorilla) PE=3 SV=1	Olfactory receptor {ECO:0000256|RuleBase:RU000688} OS=Pteropus alecto (Black flying fox) PE=3 SV=1	PREDICTED: olfactory receptor 52J3-like [Pteropus alecto]
gene18136	--	--	--	K04257|0|cjc:100410248|OR51V1; olfactory receptor 51V1; K04257 olfactory receptor (A)	--	--	Olfactory receptor 1E5 GN=OR1E5 OS=Pan troglodytes (Chimpanzee) PE=3 SV=1	Olfactory receptor {ECO:0000256|RuleBase:RU000688} OS=Callithrix jacchus (White-tufted-ear marmoset) PE=3 SV=1	PREDICTED: olfactory receptor 51V1-like [Equus caballus]
gene7749	--	--	Molecular Function: G-protein coupled receptor activity (GO:0004930);; Molecular Function: olfactory receptor activity (GO:0004984);; Cellular Component: plasma membrane (GO:0005886);; Cellular Component: integral component of membrane (GO:0016021);;	K04257|9.66316e-171|oas:101117202|olfactory receptor 2G3-like; K04257 olfactory receptor (A)	--	--	Olfactory receptor-like protein OLF3 OS=Canis familiaris (Dog) PE=3 SV=1	Olfactory receptor {ECO:0000256|RuleBase:RU000688} OS=Ovis aries (Sheep) PE=3 SV=1	PREDICTED: olfactory receptor 2G3-like [Ovis aries]
gene13524	--	--	Molecular Function: G-protein coupled receptor activity (GO:0004930);; Molecular Function: olfactory receptor activity (GO:0004984);; Cellular Component: plasma membrane (GO:0005886);; Biological Process: G-protein coupled receptor signaling pathway (GO:0007186);; Cellular Component: integral component of membrane (GO:0016021);; Biological Process: detection of chemical stimulus involved in senso…	K04257|0|ptg:102962667|olfactory receptor 51L1-like; K04257 olfactory receptor (A)	--	--	Olfactory receptor 1E5 GN=OR1E5 OS=Pan troglodytes (Chimpanzee) PE=3 SV=1	Olfactory receptor {ECO:0000256|RuleBase:RU000688} OS=Mustela putorius furo (European domestic ferret) PE=3 SV=1	PREDICTED: olfactory receptor 51L1-like [Mustela putorius furo]
gene15162	--	--	Molecular Function: G-protein coupled receptor activity (GO:0004930);; Molecular Function: olfactory receptor activity (GO:0004984);; Cellular Component: plasma membrane (GO:0005886);; Biological Process: G-protein coupled receptor signaling pathway (GO:0007186);; Cellular Component: integral component of membrane (GO:0016021);; Biological Process: detection of chemical stimulus involved in senso…	K04257|5.79309e-109|ecb:100056932|putative olfactory receptor 10AC1-like; K04257 olfactory receptor (A)	--	--	Olfactory receptor 1G1 GN=OR1G1 OS=Gorilla gorilla gorilla (Lowland gorilla) PE=3 SV=1	Olfactory receptor {ECO:0000256|RuleBase:RU000688} (Fragment) OS=Equus caballus (Horse) PE=3 SV=1	PREDICTED: putative olfactory receptor 10AC1-like [Ceratotherium simum simum]
gene25566	--	--	Molecular Function: G-protein coupled receptor activity (GO:0004930);; Molecular Function: olfactory receptor activity (GO:0004984);; Cellular Component: plasma membrane (GO:0005886);; Biological Process: G-protein coupled receptor signaling pathway (GO:0007186);; Cellular Component: integral component of membrane (GO:0016021);; Biological Process: detection of chemical stimulus involved in senso…	K04257|4.42529e-150|ptg:102952385|olfactory receptor-like protein OLF3-like; K04257 olfactory receptor (A)	--	--	Olfactory receptor-like protein OLF3 OS=Canis familiaris (Dog) PE=3 SV=1	Olfactory receptor {ECO:0000256|RuleBase:RU000688} OS=Bos taurus (Bovine) PE=3 SV=1	PREDICTED: olfactory receptor-like protein OLF3-like [Panthera tigris altaica]
gene25692	--	--	--	K04257|6.34726e-99|cjc:100386370|olfactory receptor 13G1; K04257 olfactory receptor (A)	--	--	Olfactory receptor 3A1 GN=OR3A1 OS=Gorilla gorilla gorilla (Lowland gorilla) PE=3 SV=1	Uncharacterized protein {ECO:0000313|Ensembl:ENSCJAP00000041230} OS=Callithrix jacchus (White-tufted-ear marmoset) PE=4 SV=1	PREDICTED: olfactory receptor 13G1 [Bison bison bison]
gene22141	--	--	Molecular Function: G-protein coupled receptor activity (GO:0004930);; Molecular Function: olfactory receptor activity (GO:0004984);; Cellular Component: plasma membrane (GO:0005886);; Biological Process: G-protein coupled receptor signaling pathway (GO:0007186);; Cellular Component: integral component of membrane (GO:0016021);; Biological Process: detection of chemical stimulus involved in senso…	K04257|4.52757e-151|fca:101090380|olfactory receptor 5K4-like; K04257 olfactory receptor (A)	--	--	Olfactory receptor-like protein OLF1 OS=Canis familiaris (Dog) PE=3 SV=1	Olfactory receptor {ECO:0000256|RuleBase:RU000688} (Fragment) OS=Felis catus (Cat) PE=3 SV=1	PREDICTED: olfactory receptor 5K1-like [Felis catus]
gene16712	--	--	Molecular Function: G-protein coupled receptor activity (GO:0004930);; Molecular Function: olfactory receptor activity (GO:0004984);; Cellular Component: plasma membrane (GO:0005886);; Biological Process: G-protein coupled receptor signaling pathway (GO:0007186);; Cellular Component: integral component of membrane (GO:0016021);; Biological Process: detection of chemical stimulus involved in senso…	K04257|1.80058e-70|ggo:101129687|putative olfactory receptor 10AC1-like; K04257 olfactory receptor (A)	--	--	Olfactory receptor 1E1 GN=OR1E1 OS=Pan troglodytes (Chimpanzee) PE=3 SV=1	Uncharacterized protein {ECO:0000313|Ensembl:ENSPPYP00000020332} OS=Pongo abelii (Sumatran orangutan) PE=4 SV=1	PREDICTED: putative olfactory receptor 10AC1-like [Ceratotherium simum simum]
gene12433	--	--	Molecular Function: G-protein coupled receptor activity (GO:0004930);; Molecular Function: olfactory receptor activity (GO:0004984);; Cellular Component: plasma membrane (GO:0005886);; Biological Process: G-protein coupled receptor signaling pathway (GO:0007186);; Cellular Component: integral component of membrane (GO:0016021);; Biological Process: detection of chemical stimulus involved in senso…	K04257|1.04023e-110|umr:103666223|olfactory receptor 8K3-like; K04257 olfactory receptor (A)	--	--	Olfactory receptor-like protein OLF1 OS=Canis familiaris (Dog) PE=3 SV=1	Uncharacterized protein {ECO:0000313|Ensembl:ENSAMEP00000021051} (Fragment) OS=Ailuropoda melanoleuca (Giant panda) PE=4 SV=1	PREDICTED: olfactory receptor 8K3-like [Equus przewalskii]
gene15512	--	--	Molecular Function: G-protein coupled receptor activity (GO:0004930);; Molecular Function: olfactory receptor activity (GO:0004984);; Cellular Component: plasma membrane (GO:0005886);; Biological Process: G-protein coupled receptor signaling pathway (GO:0007186);; Cellular Component: integral component of membrane (GO:0016021);; Biological Process: detection of chemical stimulus involved in senso…	K04257|7.13123e-138|cfr:102504901|olfactory receptor 4S2-like; K04257 olfactory receptor (A)	--	--	Olfactory receptor-like protein OLF3 OS=Canis familiaris (Dog) PE=3 SV=1	Olfactory receptor {ECO:0000256|RuleBase:RU000688} OS=Camelus ferus (Wild Bactrian camel) PE=3 SV=1	PREDICTED: olfactory receptor 4S2-like [Sorex araneus]
gene20037	--	--	Molecular Function: G-protein coupled receptor activity (GO:0004930);; Molecular Function: olfactory receptor activity (GO:0004984);; Cellular Component: plasma membrane (GO:0005886);; Biological Process: G-protein coupled receptor signaling pathway (GO:0007186);; Cellular Component: integral component of membrane (GO:0016021);; Biological Process: detection of chemical stimulus involved in senso…	K04257|1.09429e-178|ecb:100072098|olfactory receptor 8B3-like; K04257 olfactory receptor (A)	--	--	Olfactory receptor-like protein OLF2 OS=Canis familiaris (Dog) PE=3 SV=1	Olfactory receptor {ECO:0000256|RuleBase:RU000688} OS=Equus caballus (Horse) PE=3 SV=1	PREDICTED: olfactory receptor 8B3-like [Equus caballus]
gene19511	--	--	Molecular Function: G-protein coupled receptor activity (GO:0004930);; Molecular Function: olfactory receptor activity (GO:0004984);; Cellular Component: plasma membrane (GO:0005886);; Biological Process: G-protein coupled receptor signaling pathway (GO:0007186);; Cellular Component: integral component of membrane (GO:0016021);; Biological Process: detection of chemical stimulus involved in senso…	K04257|8.4528e-156|umr:103656362|olfactory receptor 2M3-like; K04257 olfactory receptor (A)	--	--	Olfactory receptor-like protein OLF3 OS=Canis familiaris (Dog) PE=3 SV=1	Uncharacterized protein {ECO:0000313|Ensembl:ENSECAP00000002247} (Fragment) OS=Equus caballus (Horse) PE=4 SV=1	PREDICTED: olfactory receptor 2M3-like [Ursus maritimus]
gene25552	--	--	Molecular Function: G-protein coupled receptor activity (GO:0004930);; Molecular Function: olfactory receptor activity (GO:0004984);; Cellular Component: plasma membrane (GO:0005886);; Biological Process: G-protein coupled receptor signaling pathway (GO:0007186);; Cellular Component: integral component of membrane (GO:0016021);; Biological Process: detection of chemical stimulus involved in senso…	K04257|0|ptg:102957744|olfactory receptor 4P4-like; K04257 olfactory receptor (A)	--	--	Olfactory receptor-like protein OLF1 OS=Canis familiaris (Dog) PE=3 SV=1	Olfactory receptor {ECO:0000256|RuleBase:RU000688} OS=Felis catus (Cat) PE=3 SV=1	PREDICTED: olfactory receptor 4P4-like [Odobenus rosmarus divergens]
gene26824	--	--	Molecular Function: G-protein coupled receptor activity (GO:0004930);; Molecular Function: olfactory receptor activity (GO:0004984);; Cellular Component: plasma membrane (GO:0005886);; Biological Process: G-protein coupled receptor signaling pathway (GO:0007186);; Cellular Component: integral component of membrane (GO:0016021);; Biological Process: detection of chemical stimulus involved in senso…	K04257|1.72843e-161|umr:103676329|olfactory receptor 7G2-like; K04257 olfactory receptor (A)	--	--	Olfactory receptor-like protein OLF4 OS=Canis familiaris (Dog) PE=3 SV=1	Olfactory receptor {ECO:0000256|RuleBase:RU000688} OS=Mustela putorius furo (European domestic ferret) PE=3 SV=1	PREDICTED: olfactory receptor 7G2-like [Mustela putorius furo]
gene25231	--	--	Molecular Function: G-protein coupled receptor activity (GO:0004930);; Molecular Function: olfactory receptor activity (GO:0004984);; Cellular Component: plasma membrane (GO:0005886);; Biological Process: G-protein coupled receptor signaling pathway (GO:0007186);; Cellular Component: integral component of membrane (GO:0016021);; Biological Process: detection of chemical stimulus involved in senso…	K04257|8.04199e-116|tup:102494593|olfactory receptor 13A1-like; K04257 olfactory receptor (A)	--	--	Olfactory receptor 1G1 GN=OR1G1 OS=Gorilla gorilla gorilla (Lowland gorilla) PE=3 SV=1	Olfactory receptor 13G1 {ECO:0000313|EMBL:ELW67338.1} OS=Tupaia chinensis (Chinese tree shrew) PE=4 SV=1	PREDICTED: olfactory receptor 13A1-like [Tupaia chinensis]
gene22869	--	--	Molecular Function: G-protein coupled receptor activity (GO:0004930);; Molecular Function: olfactory receptor activity (GO:0004984);; Cellular Component: plasma membrane (GO:0005886);; Biological Process: G-protein coupled receptor signaling pathway (GO:0007186);; Cellular Component: integral component of membrane (GO:0016021);; Biological Process: detection of chemical stimulus involved in senso…	K04257|5.72644e-142|bacu:103014646|olfactory receptor 1J2-like; K04257 olfactory receptor (A)	--	--	Olfactory receptor 1E5 GN=OR1E5 OS=Pan troglodytes (Chimpanzee) PE=3 SV=1	Olfactory receptor {ECO:0000256|RuleBase:RU000688} (Fragment) OS=Felis catus (Cat) PE=3 SV=1	PREDICTED: olfactory receptor 1J2-like [Balaenoptera acutorostrata scammoni]
gene15189	--	--	--	K04257|4.74015e-88|cge:100774935|olfactory receptor 5V1; K04257 olfactory receptor (A)	--	--	Olfactory receptor-like protein OLF3 OS=Canis familiaris (Dog) PE=3 SV=1	Uncharacterized protein {ECO:0000313|Ensembl:ENSLAFP00000023175} (Fragment) OS=Loxodonta africana (African elephant) PE=4 SV=1	PREDICTED: olfactory receptor 5V1-like [Trichechus manatus latirostris]
gene26201	--	--	Molecular Function: G-protein coupled receptor activity (GO:0004930);; Molecular Function: olfactory receptor activity (GO:0004984);; Cellular Component: plasma membrane (GO:0005886);; Cellular Component: integral component of membrane (GO:0016021);;	K04257|2.17984e-155|chx:102179186|olfactory receptor 7G1-like; K04257 olfactory receptor (A)	--	--	Olfactory receptor-like protein OLF4 OS=Canis familiaris (Dog) PE=3 SV=1	Uncharacterized protein {ECO:0000313|Ensembl:ENSMPUP00000019589} (Fragment) OS=Mustela putorius furo (European domestic ferret) PE=4 SV=1	PREDICTED: olfactory receptor 7G1-like [Mustela putorius furo]
gene4232	--	--	--	K04257|3.6096e-133|cfr:102513226|olfactory receptor 14C36-like; K04257 olfactory receptor (A)	--	--	Olfactory receptor 1G1 GN=OR1G1 OS=Pan troglodytes (Chimpanzee) PE=3 SV=1	Olfactory receptor 14C36-like protein {ECO:0000313|EMBL:EPY85959.1} OS=Camelus ferus (Wild Bactrian camel) PE=4 SV=1	PREDICTED: olfactory receptor 14C36-like [Condylura cristata]
gene24568	--	--	Molecular Function: G-protein coupled receptor activity (GO:0004930);; Molecular Function: olfactory receptor activity (GO:0004984);; Cellular Component: plasma membrane (GO:0005886);; Biological Process: G-protein coupled receptor signaling pathway (GO:0007186);; Cellular Component: integral component of membrane (GO:0016021);; Biological Process: detection of chemical stimulus involved in senso…	K04257|7.91983e-128|ptg:102956056|olfactory receptor 4C11-like; K04257 olfactory receptor (A)	--	--	Olfactory receptor 1E5 GN=OR1E5 OS=Pan troglodytes (Chimpanzee) PE=3 SV=1	Olfactory receptor {ECO:0000256|RuleBase:RU000688} (Fragment) OS=Callithrix jacchus (White-tufted-ear marmoset) PE=3 SV=1	PREDICTED: olfactory receptor 4C11-like [Panthera tigris altaica]
gene11093	--	--	Molecular Function: G-protein coupled receptor activity (GO:0004930);; Molecular Function: olfactory receptor activity (GO:0004984);; Biological Process: G-protein coupled receptor signaling pathway (GO:0007186);; Cellular Component: integral component of membrane (GO:0016021);; Biological Process: detection of chemical stimulus involved in sensory perception of smell (GO:0050911);;	K04257|0|umr:103678092|olfactory receptor 52M1-like; K04257 olfactory receptor (A)	--	--	Olfactory receptor-like protein OLF1 OS=Canis familiaris (Dog) PE=3 SV=1	Uncharacterized protein {ECO:0000313|Ensembl:ENSCAFP00000034021} OS=Canis familiaris (Dog) PE=4 SV=2	PREDICTED: olfactory receptor 52M1-like [Ursus maritimus]
gene23740	--	--	Molecular Function: G-protein coupled receptor activity (GO:0004930);; Molecular Function: olfactory receptor activity (GO:0004984);; Cellular Component: plasma membrane (GO:0005886);; Biological Process: G-protein coupled receptor signaling pathway (GO:0007186);; Cellular Component: integral component of membrane (GO:0016021);; Biological Process: detection of chemical stimulus involved in senso…	K04257|7.28101e-129|phd:102318658|olfactory receptor 4C46-like; K04257 olfactory receptor (A)	--	--	Olfactory receptor 1E1 GN=OR1E1 OS=Pan troglodytes (Chimpanzee) PE=3 SV=1	Olfactory receptor {ECO:0000256|RuleBase:RU000688} OS=Mustela putorius furo (European domestic ferret) PE=3 SV=1	PREDICTED: olfactory receptor 4C46-like [Mustela putorius furo]
gene17259	--	--	Molecular Function: G-protein coupled receptor activity (GO:0004930);; Molecular Function: olfactory receptor activity (GO:0004984);; Cellular Component: plasma membrane (GO:0005886);; Biological Process: G-protein coupled receptor signaling pathway (GO:0007186);; Cellular Component: integral component of membrane (GO:0016021);; Biological Process: detection of chemical stimulus involved in senso…	K04257|7.26301e-158|bta:788287|olfactory receptor 2H1; K04257 olfactory receptor (A)	--	--	Olfactory receptor-like protein OLF3 OS=Canis familiaris (Dog) PE=3 SV=1	Uncharacterized protein {ECO:0000313|Ensembl:ENSBTAP00000048626} (Fragment) OS=Bos taurus (Bovine) PE=4 SV=2	PREDICTED: olfactory receptor 2H1 isoform X2 [Bos taurus]
gene5635	--	--	Molecular Function: G-protein coupled receptor activity (GO:0004930);; Molecular Function: olfactory receptor activity (GO:0004984);; Cellular Component: plasma membrane (GO:0005886);; Biological Process: G-protein coupled receptor signaling pathway (GO:0007186);; Cellular Component: integral component of membrane (GO:0016021);; Biological Process: detection of chemical stimulus involved in senso…	K04257|1.84097e-169|ecb:100072448|olfactory receptor 5H2-like; K04257 olfactory receptor (A)	--	--	Olfactory receptor-like protein OLF1 OS=Canis familiaris (Dog) PE=3 SV=1	Olfactory receptor {ECO:0000256|RuleBase:RU000688} OS=Felis catus (Cat) PE=3 SV=1	PREDICTED: olfactory receptor 5H2-like [Equus caballus]
gene25398	--	--	Molecular Function: G-protein coupled receptor activity (GO:0004930);; Molecular Function: olfactory receptor activity (GO:0004984);; Cellular Component: plasma membrane (GO:0005886);; Biological Process: G-protein coupled receptor signaling pathway (GO:0007186);; Cellular Component: integral component of membrane (GO:0016021);; Biological Process: detection of chemical stimulus involved in senso…	K04257|0|ecb:100063748|olfactory receptor 148-like; K04257 olfactory receptor (A)	--	--	Olfactory receptor 1G1 GN=OR1G1 OS=Gorilla gorilla gorilla (Lowland gorilla) PE=3 SV=1	Uncharacterized protein {ECO:0000313|Ensembl:ENSECAP00000002042} OS=Equus caballus (Horse) PE=4 SV=1	PREDICTED: olfactory receptor 148-like [Equus caballus]
gene25143	--	--	Molecular Function: transmembrane signaling receptor activity (GO:0004888);; Biological Process: signal transduction (GO:0007165);; Biological Process: sensory perception of smell (GO:0007608);; Cellular Component: membrane (GO:0016020);; Biological Process: response to chemical (GO:0042221);;	K04257|1.15917e-140|ecb:100072242|olfactory receptor 8A1-like; K04257 olfactory receptor (A)	--	--	Olfactory receptor-like protein OLF2 OS=Canis familiaris (Dog) PE=3 SV=1	Olfactory receptor {ECO:0000256|RuleBase:RU000688} OS=Equus caballus (Horse) PE=3 SV=1	PREDICTED: olfactory receptor 8A1-like [Equus caballus]
gene5804	--	--	Molecular Function: G-protein coupled receptor activity (GO:0004930);; Molecular Function: olfactory receptor activity (GO:0004984);; Cellular Component: plasma membrane (GO:0005886);; Biological Process: G-protein coupled receptor signaling pathway (GO:0007186);; Cellular Component: integral component of membrane (GO:0016021);; Biological Process: detection of chemical stimulus involved in senso…	--	--	--	Olfactory receptor-like protein OLF1 OS=Canis familiaris (Dog) PE=3 SV=1	Olfactory receptor {ECO:0000256|RuleBase:RU000688} OS=Ailuropoda melanoleuca (Giant panda) PE=3 SV=1	PREDICTED: olfactory receptor 5L1 [Canis lupus familiaris]
gene144	--	--	Molecular Function: G-protein coupled receptor activity (GO:0004930);; Molecular Function: olfactory receptor activity (GO:0004984);; Cellular Component: plasma membrane (GO:0005886);; Biological Process: G-protein coupled receptor signaling pathway (GO:0007186);; Cellular Component: integral component of membrane (GO:0016021);; Biological Process: detection of chemical stimulus involved in senso…	K04257|0|ptg:102971560|putative olfactory receptor ENSP00000348552-like; K04257 olfactory receptor (A)	--	--	Olfactory receptor-like protein OLF3 OS=Canis familiaris (Dog) PE=3 SV=1	Olfactory receptor {ECO:0000256|RuleBase:RU000688} OS=Canis familiaris (Dog) PE=3 SV=1	PREDICTED: putative olfactory receptor ENSP00000348552-like [Panthera tigris altaica]
gene9412	--	--	--	K04257|2.15466e-132|cfr:102513226|olfactory receptor 14C36-like; K04257 olfactory receptor (A)	--	--	Olfactory receptor 1G1 GN=OR1G1 OS=Gorilla gorilla gorilla (Lowland gorilla) PE=3 SV=1	Olfactory receptor 14C36-like protein {ECO:0000313|EMBL:EPY85959.1} OS=Camelus ferus (Wild Bactrian camel) PE=4 SV=1	PREDICTED: olfactory receptor 14C36-like [Camelus dromedarius]
gene23084	--	--	--	K04257|1.99861e-163|tup:102489478|olfactory receptor 6C2-like; K04257 olfactory receptor (A)	--	--	Olfactory receptor 1G1 GN=OR1G1 OS=Gorilla gorilla gorilla (Lowland gorilla) PE=3 SV=1	Olfactory receptor {ECO:0000256|RuleBase:RU000688} OS=Tupaia chinensis (Chinese tree shrew) PE=3 SV=1	PREDICTED: olfactory receptor 6C2-like [Mustela putorius furo]
gene20596	--	--	Molecular Function: G-protein coupled receptor activity (GO:0004930);; Molecular Function: olfactory receptor activity (GO:0004984);; Cellular Component: plasma membrane (GO:0005886);; Biological Process: G-protein coupled receptor signaling pathway (GO:0007186);; Cellular Component: integral component of membrane (GO:0016021);; Biological Process: detection of chemical stimulus involved in senso…	K04257|6.62625e-126|oas:101115277|olfactory receptor 5V1-like; K04257 olfactory receptor (A)	--	--	Olfactory receptor 3A2 GN=OR3A2 OS=Pan troglodytes (Chimpanzee) PE=3 SV=1	Olfactory receptor {ECO:0000256|RuleBase:RU000688} (Fragment) OS=Bos mutus PE=3 SV=1	PREDICTED: olfactory receptor 5V1-like [Dasypus novemcinctus]
gene22842	--	--	Molecular Function: G-protein coupled receptor activity (GO:0004930);; Molecular Function: olfactory receptor activity (GO:0004984);; Cellular Component: plasma membrane (GO:0005886);; Biological Process: G-protein coupled receptor signaling pathway (GO:0007186);; Cellular Component: integral component of membrane (GO:0016021);; Biological Process: detection of chemical stimulus involved in senso…	K04257|7.15082e-160|ocu:100341479|olfactory receptor 5-like; K04257 olfactory receptor (A)	--	--	Olfactory receptor 1G1 GN=OR1G1 OS=Gorilla gorilla gorilla (Lowland gorilla) PE=3 SV=1	Olfactory receptor {ECO:0000256|RuleBase:RU000688} OS=Mustela putorius furo (European domestic ferret) PE=3 SV=1	PREDICTED: olfactory receptor 5-like [Mustela putorius furo]
gene11467	--	--	Molecular Function: G-protein coupled receptor activity (GO:0004930);; Molecular Function: olfactory receptor activity (GO:0004984);; Cellular Component: plasma membrane (GO:0005886);; Biological Process: G-protein coupled receptor signaling pathway (GO:0007186);; Cellular Component: integral component of membrane (GO:0016021);; Biological Process: detection of chemical stimulus involved in senso…	K04257|3.20402e-89|tup:102492907|olfactory receptor 10K2-like; K04257 olfactory receptor (A)	--	--	Olfactory receptor-like protein DTMT OS=Canis familiaris (Dog) PE=3 SV=1	Olfactory receptor 10K2 {ECO:0000313|EMBL:ELW47819.1} OS=Tupaia chinensis (Chinese tree shrew) PE=4 SV=1	PREDICTED: olfactory receptor 10K2-like [Tupaia chinensis]
gene13617	--	--	Molecular Function: G-protein coupled receptor activity (GO:0004930);; Molecular Function: olfactory receptor activity (GO:0004984);; Cellular Component: plasma membrane (GO:0005886);; Biological Process: G-protein coupled receptor signaling pathway (GO:0007186);; Cellular Component: integral component of membrane (GO:0016021);; Biological Process: detection of chemical stimulus involved in senso…	K04257|0|ocu:100347680|olfactory receptor 4M1; K04257 olfactory receptor (A)	--	--	Olfactory receptor 1G1 GN=OR1G1 OS=Gorilla gorilla gorilla (Lowland gorilla) PE=3 SV=1	Olfactory receptor {ECO:0000256|RuleBase:RU000688} OS=Loxodonta africana (African elephant) PE=3 SV=1	PREDICTED: olfactory receptor 4M1 [Loxodonta africana]
gene20608	--	--	Molecular Function: G-protein coupled receptor activity (GO:0004930);; Molecular Function: olfactory receptor activity (GO:0004984);; Cellular Component: plasma membrane (GO:0005886);; Biological Process: G-protein coupled receptor signaling pathway (GO:0007186);; Cellular Component: integral component of membrane (GO:0016021);; Biological Process: detection of chemical stimulus involved in senso…	K04257|0|ssc:100154719|olfactory receptor 6C2-like; K04257 olfactory receptor (A)	--	--	Olfactory receptor 1E5 GN=OR1E5 OS=Pan troglodytes (Chimpanzee) PE=3 SV=1	Olfactory receptor {ECO:0000256|RuleBase:RU000688} OS=Canis familiaris (Dog) PE=3 SV=1	PREDICTED: olfactory receptor 6C2-like [Sus scrofa]
gene9513	--	--	Molecular Function: G-protein coupled receptor activity (GO:0004930);; Molecular Function: olfactory receptor activity (GO:0004984);; Cellular Component: plasma membrane (GO:0005886);; Cellular Component: integral component of membrane (GO:0016021);;	K04257|2.81432e-166|umr:103680620|olfactory receptor 5V1-like; K04257 olfactory receptor (A)	--	--	Olfactory receptor 1G1 GN=OR1G1 OS=Gorilla gorilla gorilla (Lowland gorilla) PE=3 SV=1	Olfactory receptor {ECO:0000256|RuleBase:RU000688} (Fragment) OS=Bos mutus PE=3 SV=1	PREDICTED: olfactory receptor 5V1-like [Ursus maritimus]
gene25307	--	--	Molecular Function: G-protein coupled receptor activity (GO:0004930);; Molecular Function: olfactory receptor activity (GO:0004984);; Cellular Component: plasma membrane (GO:0005886);; Biological Process: G-protein coupled receptor signaling pathway (GO:0007186);; Cellular Component: integral component of membrane (GO:0016021);; Biological Process: detection of chemical stimulus involved in senso…	K04257|0|myd:102760987|olfactory receptor 1019-like; K04257 olfactory receptor (A)	--	--	Olfactory receptor-like protein OLF2 OS=Canis familiaris (Dog) PE=3 SV=1	Olfactory receptor {ECO:0000256|RuleBase:RU000688} OS=Myotis davidii (David's myotis) PE=3 SV=1	PREDICTED: olfactory receptor 1019-like [Chrysochloris asiatica]
gene16805	--	--	Molecular Function: G-protein coupled receptor activity (GO:0004930);; Molecular Function: olfactory receptor activity (GO:0004984);; Cellular Component: plasma membrane (GO:0005886);; Cellular Component: integral component of membrane (GO:0016021);;	K04257|0|cfa:486481|cOR6C33; cOR6C33 olfactory receptor family 6 subfamily C-like; K04257 olfactory receptor (A)	--	--	Olfactory receptor-like protein OLF3 OS=Canis familiaris (Dog) PE=3 SV=1	Olfactory receptor {ECO:0000256|RuleBase:RU000688} OS=Canis familiaris (Dog) PE=3 SV=2	PREDICTED: olfactory receptor 6C4 [Canis lupus familiaris]
gene4244	--	--	Molecular Function: G-protein coupled receptor activity (GO:0004930);; Molecular Function: olfactory receptor activity (GO:0004984);; Cellular Component: plasma membrane (GO:0005886);; Biological Process: G-protein coupled receptor signaling pathway (GO:0007186);; Cellular Component: integral component of membrane (GO:0016021);; Biological Process: detection of chemical stimulus involved in senso…	K04257|0|cfr:102507633|olfactory receptor 2T2-like; K04257 olfactory receptor (A)	--	--	Olfactory receptor-like protein OLF3 OS=Canis familiaris (Dog) PE=3 SV=1	Olfactory receptor {ECO:0000256|RuleBase:RU000688} OS=Camelus ferus (Wild Bactrian camel) PE=3 SV=1	PREDICTED: olfactory receptor 2T2-like [Camelus ferus]
gene13269	--	--	Molecular Function: G-protein coupled receptor activity (GO:0004930);; Molecular Function: olfactory receptor activity (GO:0004984);; Cellular Component: plasma membrane (GO:0005886);; Biological Process: G-protein coupled receptor signaling pathway (GO:0007186);; Cellular Component: integral component of membrane (GO:0016021);; Biological Process: detection of chemical stimulus involved in senso…	K04257|1.73492e-179|cfa:483545|COR12E4; olfactory receptor family 12 subfamily E; K04257 olfactory receptor (A)	--	--	Olfactory receptor 1G1 GN=OR1G1 OS=Gorilla gorilla gorilla (Lowland gorilla) PE=3 SV=1	Olfactory receptor {ECO:0000256|RuleBase:RU000688} OS=Loxodonta africana (African elephant) PE=3 SV=1	olfactory receptor family 12 subfamily E [Canis lupus familiaris]
gene22347	--	--	Molecular Function: G-protein coupled receptor activity (GO:0004930);; Molecular Function: olfactory receptor activity (GO:0004984);; Cellular Component: plasma membrane (GO:0005886);; Biological Process: G-protein coupled receptor signaling pathway (GO:0007186);; Cellular Component: integral component of membrane (GO:0016021);; Biological Process: detection of chemical stimulus involved in senso…	K04257|8.01067e-151|cfa:484858|cOR10H10; cOR10H10 olfactory receptor family 10 subfamily H-like; K04257 olfactory receptor (A)	--	--	Olfactory receptor-like protein OLF3 OS=Canis familiaris (Dog) PE=3 SV=1	Uncharacterized protein {ECO:0000313|Ensembl:ENSFCAP00000021332} (Fragment) OS=Felis catus (Cat) PE=4 SV=1	PREDICTED: olfactory receptor 10H3 [Canis lupus familiaris]
gene1536	--	--	Molecular Function: G-protein coupled receptor activity (GO:0004930);; Molecular Function: olfactory receptor activity (GO:0004984);; Cellular Component: plasma membrane (GO:0005886);; Biological Process: G-protein coupled receptor signaling pathway (GO:0007186);; Cellular Component: integral component of membrane (GO:0016021);; Biological Process: detection of chemical stimulus involved in senso…	K04257|6.12679e-161|umr:103678914|olfactory receptor 6C2-like; K04257 olfactory receptor (A)	--	--	Olfactory receptor-like protein OLF3 OS=Canis familiaris (Dog) PE=3 SV=1	Olfactory receptor {ECO:0000256|RuleBase:RU000688} (Fragment) OS=Myotis lucifugus (Little brown bat) PE=3 SV=1	PREDICTED: olfactory receptor 6C2-like [Ursus maritimus]
gene9410	--	--	--	K04257|6.15097e-135|cfr:102513226|olfactory receptor 14C36-like; K04257 olfactory receptor (A)	--	--	Olfactory receptor-like protein OLF1 OS=Canis familiaris (Dog) PE=3 SV=1	Olfactory receptor 14C36-like protein {ECO:0000313|EMBL:EPY85959.1} OS=Camelus ferus (Wild Bactrian camel) PE=4 SV=1	PREDICTED: olfactory receptor 14C36-like [Condylura cristata]
gene15269	--	--	Molecular Function: G-protein coupled receptor activity (GO:0004930);; Molecular Function: olfactory receptor activity (GO:0004984);; Cellular Component: plasma membrane (GO:0005886);; Biological Process: G-protein coupled receptor signaling pathway (GO:0007186);; Cellular Component: integral component of membrane (GO:0016021);; Biological Process: detection of chemical stimulus involved in senso…	K04257|0|hgl:101721722|olfactory receptor 8D2-like; K04257 olfactory receptor (A)	--	--	Olfactory receptor-like protein OLF2 OS=Canis familiaris (Dog) PE=3 SV=1	Olfactory receptor {ECO:0000256|RuleBase:RU000688} (Fragment) OS=Felis catus (Cat) PE=3 SV=1	PREDICTED: olfactory receptor 8D2 [Ursus maritimus]
gene8155	--	--	Molecular Function: G-protein coupled receptor activity (GO:0004930);; Molecular Function: olfactory receptor activity (GO:0004984);; Cellular Component: plasma membrane (GO:0005886);; Biological Process: G-protein coupled receptor signaling pathway (GO:0007186);; Cellular Component: integral component of membrane (GO:0016021);; Biological Process: detection of chemical stimulus involved in senso…	K04257|1.39438e-178|pps:100991478|olfactory receptor 2AJ1; K04257 olfactory receptor (A)	--	--	Olfactory receptor-like protein OLF3 OS=Canis familiaris (Dog) PE=3 SV=1	Olfactory receptor {ECO:0000256|RuleBase:RU000688} (Fragment) OS=Mustela putorius furo (European domestic ferret) PE=3 SV=1	PREDICTED: olfactory receptor 2AJ1-like [Bubalus bubalis]
gene22779	--	--	Molecular Function: G-protein coupled receptor activity (GO:0004930);; Molecular Function: olfactory receptor activity (GO:0004984);; Cellular Component: plasma membrane (GO:0005886);; Biological Process: G-protein coupled receptor signaling pathway (GO:0007186);; Cellular Component: integral component of membrane (GO:0016021);; Biological Process: detection of chemical stimulus involved in senso…	K04257|5.56347e-158|umr:103678914|olfactory receptor 6C2-like; K04257 olfactory receptor (A)	--	--	Olfactory receptor-like protein OLF3 OS=Canis familiaris (Dog) PE=3 SV=1	Olfactory receptor {ECO:0000256|RuleBase:RU000688} OS=Felis catus (Cat) PE=3 SV=1	PREDICTED: olfactory receptor 6C2-like [Ursus maritimus]
gene5544	--	--	Molecular Function: G-protein coupled receptor activity (GO:0004930);; Molecular Function: olfactory receptor activity (GO:0004984);; Cellular Component: plasma membrane (GO:0005886);; Biological Process: G-protein coupled receptor signaling pathway (GO:0007186);; Cellular Component: integral component of membrane (GO:0016021);; Biological Process: detection of chemical stimulus involved in senso…	K04257|0|myd:102769199|olfactory receptor 51J1-like; K04257 olfactory receptor (A)	--	--	Olfactory receptor-like protein OLF1 OS=Canis familiaris (Dog) PE=3 SV=1	Olfactory receptor {ECO:0000256|RuleBase:RU000688} OS=Myotis davidii (David's myotis) PE=3 SV=1	PREDICTED: olfactory receptor 51J1-like [Myotis davidii]
gene19659	--	--	Molecular Function: G-protein coupled receptor activity (GO:0004930);; Molecular Function: olfactory receptor activity (GO:0004984);; Cellular Component: plasma membrane (GO:0005886);; Biological Process: G-protein coupled receptor signaling pathway (GO:0007186);; Cellular Component: integral component of membrane (GO:0016021);; Biological Process: detection of chemical stimulus involved in senso…	K04257|0|tup:102473813|olfactory receptor 51G1-like; K04257 olfactory receptor (A)	--	--	Olfactory receptor 1D2 GN=OR1D2 OS=Gorilla gorilla gorilla (Lowland gorilla) PE=3 SV=1	Olfactory receptor {ECO:0000256|RuleBase:RU000688} OS=Tupaia chinensis (Chinese tree shrew) PE=3 SV=1	PREDICTED: olfactory receptor 51G1 [Orycteropus afer afer]
gene15838	--	--	--	K04257|3.55281e-96|oaa:100680681|olfactory receptor 14A16-like; K04257 olfactory receptor (A)	--	--	Olfactory receptor 1G1 GN=OR1G1 OS=Gorilla gorilla gorilla (Lowland gorilla) PE=3 SV=1	Uncharacterized protein {ECO:0000313|Ensembl:ENSSSCP00000014832} (Fragment) OS=Sus scrofa (Pig) PE=3 SV=2	PREDICTED: olfactory receptor 14A16-like, partial [Ornithorhynchus anatinus]
gene5710	--	--	Molecular Function: G-protein coupled receptor activity (GO:0004930);; Molecular Function: olfactory receptor activity (GO:0004984);; Cellular Component: plasma membrane (GO:0005886);; Biological Process: G-protein coupled receptor signaling pathway (GO:0007186);; Cellular Component: integral component of membrane (GO:0016021);; Biological Process: detection of chemical stimulus involved in senso…	K04257|4.92541e-168|ecb:100058198|olfactory receptor 8S1-like; K04257 olfactory receptor (A)	--	--	Olfactory receptor-like protein DTMT OS=Canis familiaris (Dog) PE=3 SV=1	Olfactory receptor {ECO:0000256|RuleBase:RU000688} OS=Equus caballus (Horse) PE=3 SV=1	PREDICTED: olfactory receptor 8S1-like [Equus caballus]
gene10747	--	--	Molecular Function: G-protein coupled receptor activity (GO:0004930);; Molecular Function: olfactory receptor activity (GO:0004984);; Cellular Component: plasma membrane (GO:0005886);; Biological Process: G-protein coupled receptor signaling pathway (GO:0007186);; Cellular Component: integral component of membrane (GO:0016021);; Biological Process: detection of chemical stimulus involved in senso…	K04257|3.19383e-158|umr:103666041|olfactory receptor 4P4-like; K04257 olfactory receptor (A)	--	--	Olfactory receptor-like protein OLF3 OS=Canis familiaris (Dog) PE=3 SV=1	Olfactory receptor {ECO:0000256|RuleBase:RU000688} (Fragment) OS=Canis familiaris (Dog) PE=3 SV=1	PREDICTED: olfactory receptor 4P4-like [Ursus maritimus]
gene8554	--	--	Molecular Function: G-protein coupled receptor activity (GO:0004930);; Molecular Function: olfactory receptor activity (GO:0004984);; Cellular Component: plasma membrane (GO:0005886);; Biological Process: G-protein coupled receptor signaling pathway (GO:0007186);; Cellular Component: integral component of membrane (GO:0016021);; Biological Process: detection of chemical stimulus involved in senso…	K04257|0|cfa:483524|olfactory receptor 5M9-like; K04257 olfactory receptor (A)	--	--	Olfactory receptor-like protein OLF1 OS=Canis familiaris (Dog) PE=3 SV=1	Olfactory receptor {ECO:0000256|RuleBase:RU000688} OS=Mustela putorius furo (European domestic ferret) PE=3 SV=1	PREDICTED: olfactory receptor 5M9 [Erinaceus europaeus]
gene14425	--	--	Molecular Function: G-protein coupled receptor activity (GO:0004930);; Molecular Function: olfactory receptor activity (GO:0004984);; Cellular Component: plasma membrane (GO:0005886);; Cellular Component: integral component of membrane (GO:0016021);;	K04257|0|cfr:102513798|olfactory receptor 4D9-like; K04257 olfactory receptor (A)	--	--	Olfactory receptor-like protein OLF1 OS=Canis familiaris (Dog) PE=3 SV=1	Olfactory receptor {ECO:0000256|RuleBase:RU000688} (Fragment) OS=Mustela putorius furo (European domestic ferret) PE=3 SV=1	PREDICTED: olfactory receptor 4D9-like [Camelus ferus]
gene11461	--	--	Molecular Function: G-protein coupled receptor activity (GO:0004930);; Molecular Function: olfactory receptor activity (GO:0004984);; Cellular Component: plasma membrane (GO:0005886);; Biological Process: G-protein coupled receptor signaling pathway (GO:0007186);; Cellular Component: integral component of membrane (GO:0016021);; Biological Process: detection of chemical stimulus involved in senso…	K04257|5.73435e-172|cfa:610594|OR6P1; olfactory receptor, family 6, subfamily P, member 1; K04257 olfactory receptor (A)	--	--	Olfactory receptor 3A2 GN=OR3A2 OS=Gorilla gorilla gorilla (Lowland gorilla) PE=3 SV=1	Olfactory receptor {ECO:0000256|RuleBase:RU000688} OS=Canis familiaris (Dog) PE=3 SV=1	olfactory receptor OR0346 [Canis lupus familiaris]
gene13406	--	--	Molecular Function: G-protein coupled receptor activity (GO:0004930);; Molecular Function: olfactory receptor activity (GO:0004984);; Cellular Component: plasma membrane (GO:0005886);; Biological Process: G-protein coupled receptor signaling pathway (GO:0007186);; Cellular Component: integral component of membrane (GO:0016021);; Biological Process: detection of chemical stimulus involved in senso…	K04257|3.1679e-174|ecb:100072004|olfactory receptor 4K17-like; K04257 olfactory receptor (A)	--	--	Olfactory receptor-like protein OLF3 OS=Canis familiaris (Dog) PE=3 SV=1	Olfactory receptor {ECO:0000256|RuleBase:RU000688} OS=Loxodonta africana (African elephant) PE=3 SV=1	PREDICTED: olfactory receptor 4K17-like [Equus caballus]
gene8548	--	--	Molecular Function: G-protein coupled receptor activity (GO:0004930);; Molecular Function: olfactory receptor activity (GO:0004984);; Cellular Component: plasma membrane (GO:0005886);; Biological Process: G-protein coupled receptor signaling pathway (GO:0007186);; Cellular Component: integral component of membrane (GO:0016021);; Biological Process: detection of chemical stimulus involved in senso…	K04257|0|cge:100760796|olfactory receptor 1030; K04257 olfactory receptor (A)	--	--	Olfactory receptor-like protein OLF2 OS=Canis familiaris (Dog) PE=3 SV=1	Olfactory receptor {ECO:0000256|RuleBase:RU000688} (Fragment) OS=Sus scrofa (Pig) PE=3 SV=2	PREDICTED: olfactory receptor 1030-like [Chrysochloris asiatica]
gene1983	--	--	Molecular Function: G-protein coupled receptor activity (GO:0004930);; Molecular Function: olfactory receptor activity (GO:0004984);; Cellular Component: plasma membrane (GO:0005886);; Biological Process: G-protein coupled receptor signaling pathway (GO:0007186);; Cellular Component: integral component of membrane (GO:0016021);; Biological Process: detection of chemical stimulus involved in senso…	K04257|1.14309e-172|umr:103656362|olfactory receptor 2M3-like; K04257 olfactory receptor (A)	--	--	Olfactory receptor-like protein OLF3 OS=Canis familiaris (Dog) PE=3 SV=1	Olfactory receptor {ECO:0000256|RuleBase:RU000688} (Fragment) OS=Canis familiaris (Dog) PE=3 SV=2	PREDICTED: olfactory receptor 2M3-like [Ursus maritimus]
gene17138	--	--	Molecular Function: G-protein coupled receptor activity (GO:0004930);; Molecular Function: olfactory receptor activity (GO:0004984);; Cellular Component: plasma membrane (GO:0005886);; Biological Process: G-protein coupled receptor signaling pathway (GO:0007186);; Cellular Component: integral component of membrane (GO:0016021);; Biological Process: detection of chemical stimulus involved in senso…	K04257|1.22446e-120|umr:103666098|olfactory receptor 9G1-like; K04257 olfactory receptor (A)	--	--	Olfactory receptor-like protein OLF2 OS=Canis familiaris (Dog) PE=3 SV=1	Olfactory receptor {ECO:0000256|RuleBase:RU000688} OS=Ailuropoda melanoleuca (Giant panda) PE=3 SV=1	PREDICTED: olfactory receptor 9G1-like [Ursus maritimus]
gene20036	--	--	Molecular Function: G-protein coupled receptor activity (GO:0004930);; Molecular Function: olfactory receptor activity (GO:0004984);; Cellular Component: plasma membrane (GO:0005886);; Biological Process: G-protein coupled receptor signaling pathway (GO:0007186);; Cellular Component: integral component of membrane (GO:0016021);; Biological Process: detection of chemical stimulus involved in senso…	K04257|0|chx:102177777|olfactory receptor 8B3-like; K04257 olfactory receptor (A)	--	--	Olfactory receptor-like protein OLF2 OS=Canis familiaris (Dog) PE=3 SV=1	Olfactory receptor {ECO:0000256|RuleBase:RU000688} (Fragment) OS=Ovis aries (Sheep) PE=3 SV=1	PREDICTED: olfactory receptor 8B3-like [Condylura cristata]
gene25158	--	--	Molecular Function: G-protein coupled receptor activity (GO:0004930);; Molecular Function: olfactory receptor activity (GO:0004984);; Cellular Component: plasma membrane (GO:0005886);; Biological Process: G-protein coupled receptor signaling pathway (GO:0007186);; Cellular Component: integral component of membrane (GO:0016021);; Biological Process: detection of chemical stimulus involved in senso…	K04257|0|aml:100469633|olfactory receptor 4D5-like; K04257 olfactory receptor (A)	--	--	Olfactory receptor-like protein OLF1 OS=Canis familiaris (Dog) PE=3 SV=1	Uncharacterized protein {ECO:0000313|Ensembl:ENSCAFP00000032245} OS=Canis familiaris (Dog) PE=4 SV=2	PREDICTED: LOW QUALITY PROTEIN: olfactory receptor 4D5 [Ailuropoda melanoleuca]
gene18533	--	--	Molecular Function: G-protein coupled receptor activity (GO:0004930);; Molecular Function: olfactory receptor activity (GO:0004984);; Cellular Component: plasma membrane (GO:0005886);; Biological Process: G-protein coupled receptor signaling pathway (GO:0007186);; Cellular Component: integral component of membrane (GO:0016021);; Biological Process: detection of chemical stimulus involved in senso…	K04257|1.04303e-174|ecb:100066693|olfactory receptor 5AN1-like; K04257 olfactory receptor (A)	--	--	Olfactory receptor-like protein OLF1 OS=Canis familiaris (Dog) PE=3 SV=1	Olfactory receptor {ECO:0000256|RuleBase:RU000688} OS=Equus caballus (Horse) PE=3 SV=1	PREDICTED: olfactory receptor 5AN1-like [Vicugna pacos]
gene20464	--	--	--	K04257|0|cfa:483502|OR5AK2, cOR5AK7; cOR5AK7 olfactory receptor family 5 subfamily AK-like; K04257 olfactory receptor (A)	--	--	Olfactory receptor-like protein OLF1 OS=Canis familiaris (Dog) PE=3 SV=1	Olfactory receptor {ECO:0000256|RuleBase:RU000688} OS=Otolemur garnettii (Small-eared galago) PE=3 SV=1	PREDICTED: putative olfactory receptor 5AK3 [Camelus bactrianus]
gene11174	--	--	Molecular Function: G-protein coupled receptor activity (GO:0004930);; Molecular Function: olfactory receptor activity (GO:0004984);; Cellular Component: plasma membrane (GO:0005886);; Biological Process: G-protein coupled receptor signaling pathway (GO:0007186);; Cellular Component: integral component of membrane (GO:0016021);; Biological Process: detection of chemical stimulus involved in senso…	K04257|7.03905e-177|ptg:102957981|olfactory receptor 14A16-like; K04257 olfactory receptor (A)	--	--	Olfactory receptor 1G1 GN=OR1G1 OS=Gorilla gorilla gorilla (Lowland gorilla) PE=3 SV=1	Olfactory receptor {ECO:0000256|RuleBase:RU000688} (Fragment) OS=Equus caballus (Horse) PE=3 SV=1	PREDICTED: olfactory receptor 14A16-like [Panthera tigris altaica]
gene8362	--	--	Molecular Function: G-protein coupled receptor activity (GO:0004930);; Molecular Function: olfactory receptor activity (GO:0004984);; Cellular Component: plasma membrane (GO:0005886);; Biological Process: G-protein coupled receptor signaling pathway (GO:0007186);; Cellular Component: integral component of membrane (GO:0016021);; Biological Process: detection of chemical stimulus involved in senso…	K04257|3.63075e-164|tup:102489210|olfactory receptor 6C2-like; K04257 olfactory receptor (A)	--	--	Olfactory receptor-like protein OLF3 OS=Canis familiaris (Dog) PE=3 SV=1	Olfactory receptor {ECO:0000256|RuleBase:RU000688} OS=Otolemur garnettii (Small-eared galago) PE=3 SV=1	PREDICTED: olfactory receptor 6C2-like [Tupaia chinensis]
Manis_javanica_newGene_9490	--	--	Molecular Function: transmembrane signaling receptor activity (GO:0004888);; Biological Process: signal transduction (GO:0007165);; Biological Process: sensory perception of smell (GO:0007608);; Cellular Component: membrane (GO:0016020);;	K04257|5.29678e-55|bta:789246|olfactory receptor 1361; K04257 olfactory receptor (A)	--	--	Olfactory receptor-like protein OLF4 OS=Canis familiaris (Dog) PE=3 SV=1	--	PREDICTED: olfactory receptor 1361-like [Elephantulus edwardii]
gene6576	--	--	Molecular Function: G-protein coupled receptor activity (GO:0004930);; Molecular Function: olfactory receptor activity (GO:0004984);; Cellular Component: plasma membrane (GO:0005886);; Biological Process: G-protein coupled receptor signaling pathway (GO:0007186);; Cellular Component: integral component of membrane (GO:0016021);; Biological Process: detection of chemical stimulus involved in senso…	K04257|5.73851e-164|umr:103676329|olfactory receptor 7G2-like; K04257 olfactory receptor (A)	--	--	Olfactory receptor-like protein OLF4 OS=Canis familiaris (Dog) PE=3 SV=1	Olfactory receptor {ECO:0000256|RuleBase:RU000688} OS=Mustela putorius furo (European domestic ferret) PE=3 SV=1	PREDICTED: olfactory receptor 7G2-like [Ursus maritimus]
gene21728	--	--	Molecular Function: G-protein coupled receptor activity (GO:0004930);; Molecular Function: olfactory receptor activity (GO:0004984);; Cellular Component: plasma membrane (GO:0005886);; Biological Process: G-protein coupled receptor signaling pathway (GO:0007186);; Cellular Component: integral component of membrane (GO:0016021);; Biological Process: detection of chemical stimulus involved in senso…	K04257|7.54705e-139|myb:102256615|olfactory receptor 1L3-like; K04257 olfactory receptor (A)	--	--	Olfactory receptor 1A1 GN=OR1A1 OS=Gorilla gorilla gorilla (Lowland gorilla) PE=3 SV=1	Olfactory receptor {ECO:0000256|RuleBase:RU000688} OS=Myotis brandtii (Brandt's bat) PE=3 SV=1	PREDICTED: olfactory receptor 1L3 [Equus przewalskii]
gene22506	--	--	Molecular Function: G-protein coupled receptor activity (GO:0004930);; Molecular Function: olfactory receptor activity (GO:0004984);; Cellular Component: plasma membrane (GO:0005886);; Biological Process: G-protein coupled receptor signaling pathway (GO:0007186);; Cellular Component: integral component of membrane (GO:0016021);; Biological Process: detection of chemical stimulus involved in senso…	K04257|1.58417e-157|umr:103680803|olfactory receptor 2L8-like; K04257 olfactory receptor (A)	--	--	Olfactory receptor-like protein OLF1 OS=Canis familiaris (Dog) PE=3 SV=1	Olfactory receptor {ECO:0000256|RuleBase:RU000688} OS=Macaca fascicularis (Crab-eating macaque) PE=3 SV=1	PREDICTED: olfactory receptor 2L8-like [Ursus maritimus]
gene24721	--	--	Molecular Function: G-protein coupled receptor activity (GO:0004930);; Molecular Function: olfactory receptor activity (GO:0004984);; Cellular Component: plasma membrane (GO:0005886);; Biological Process: G-protein coupled receptor signaling pathway (GO:0007186);; Cellular Component: integral component of membrane (GO:0016021);; Biological Process: detection of chemical stimulus involved in senso…	K04257|5.55572e-177|bacu:103011083|olfactory receptor 2A2-like; K04257 olfactory receptor (A)	--	--	Olfactory receptor-like protein OLF3 OS=Canis familiaris (Dog) PE=3 SV=1	Uncharacterized protein {ECO:0000313|Ensembl:ENSMPUP00000018470} OS=Mustela putorius furo (European domestic ferret) PE=4 SV=1	PREDICTED: olfactory receptor 2A2-like [Balaenoptera acutorostrata scammoni]
gene25793	--	--	--	K04257|8.43884e-150|umr:103676329|olfactory receptor 7G2-like; K04257 olfactory receptor (A)	--	--	Olfactory receptor-like protein OLF4 OS=Canis familiaris (Dog) PE=3 SV=1	Olfactory receptor {ECO:0000256|RuleBase:RU000688} (Fragment) OS=Ailuropoda melanoleuca (Giant panda) PE=3 SV=1	PREDICTED: olfactory receptor 7G2-like [Ursus maritimus]
gene13400	--	--	--	K04257|2.08079e-135|cfr:102513226|olfactory receptor 14C36-like; K04257 olfactory receptor (A)	--	--	Olfactory receptor-like protein OLF1 OS=Canis familiaris (Dog) PE=3 SV=1	Olfactory receptor 14C36-like protein {ECO:0000313|EMBL:EPY85959.1} OS=Camelus ferus (Wild Bactrian camel) PE=4 SV=1	PREDICTED: olfactory receptor 14C36-like [Erinaceus europaeus]
gene21164	--	--	Molecular Function: G-protein coupled receptor activity (GO:0004930);; Molecular Function: olfactory receptor activity (GO:0004984);; Cellular Component: plasma membrane (GO:0005886);; Biological Process: G-protein coupled receptor signaling pathway (GO:0007186);; Cellular Component: integral component of membrane (GO:0016021);; Biological Process: detection of chemical stimulus involved in senso…	K04257|1.96765e-84|umr:103666067|olfactory receptor 8H1-like; K04257 olfactory receptor (A)	--	--	Olfactory receptor-like protein OLF1 OS=Canis familiaris (Dog) PE=3 SV=1	Olfactory receptor {ECO:0000256|RuleBase:RU000688} (Fragment) OS=Ailuropoda melanoleuca (Giant panda) PE=3 SV=1	PREDICTED: olfactory receptor 8H1-like [Mustela putorius furo]
gene18543	--	--	Molecular Function: G-protein coupled receptor activity (GO:0004930);; Molecular Function: olfactory receptor activity (GO:0004984);; Cellular Component: plasma membrane (GO:0005886);; Cellular Component: integral component of membrane (GO:0016021);;	K04257|0|pale:102896310|olfactory receptor 3A2-like; K04257 olfactory receptor (A)	--	--	Olfactory receptor 3A2 GN=OR3A2 OS=Pan troglodytes (Chimpanzee) PE=3 SV=1	Olfactory receptor {ECO:0000256|RuleBase:RU000688} OS=Pteropus alecto (Black flying fox) PE=3 SV=1	PREDICTED: olfactory receptor 3A2-like [Pteropus alecto]
gene22937	--	--	Molecular Function: G-protein coupled receptor activity (GO:0004930);; Molecular Function: olfactory receptor activity (GO:0004984);; Cellular Component: plasma membrane (GO:0005886);; Biological Process: G-protein coupled receptor signaling pathway (GO:0007186);; Cellular Component: integral component of membrane (GO:0016021);; Biological Process: detection of chemical stimulus involved in senso…	K04257|0|umr:103680102|olfactory receptor 52H1-like; K04257 olfactory receptor (A)	--	--	Olfactory receptor 1E1 GN=OR1E1 OS=Pan troglodytes (Chimpanzee) PE=3 SV=1	Olfactory receptor {ECO:0000256|RuleBase:RU000688} OS=Dasypus novemcinctus (Nine-banded armadillo) PE=3 SV=1	olfactory receptor 652 (predicted) [Dasypus novemcinctus]
gene12944	--	--	--	K04257|1.98018e-86|tup:102489478|olfactory receptor 6C2-like; K04257 olfactory receptor (A)	--	--	Olfactory receptor 1G1 GN=OR1G1 OS=Gorilla gorilla gorilla (Lowland gorilla) PE=3 SV=1	Olfactory receptor {ECO:0000256|RuleBase:RU000688} OS=Tupaia chinensis (Chinese tree shrew) PE=3 SV=1	PREDICTED: olfactory receptor 6C2-like [Tupaia chinensis]
gene22843	--	--	Molecular Function: G-protein coupled receptor activity (GO:0004930);; Molecular Function: olfactory receptor activity (GO:0004984);; Cellular Component: plasma membrane (GO:0005886);; Biological Process: G-protein coupled receptor signaling pathway (GO:0007186);; Cellular Component: integral component of membrane (GO:0016021);; Biological Process: detection of chemical stimulus involved in senso…	K04257|0|ecb:100630346|olfactory receptor 5-like; K04257 olfactory receptor (A)	--	--	Olfactory receptor 1G1 GN=OR1G1 OS=Gorilla gorilla gorilla (Lowland gorilla) PE=3 SV=1	Uncharacterized protein {ECO:0000313|Ensembl:ENSFCAP00000020188} OS=Felis catus (Cat) PE=4 SV=1	PREDICTED: olfactory receptor 5-like [Ceratotherium simum simum]
gene18542	--	--	Molecular Function: G-protein coupled receptor activity (GO:0004930);; Molecular Function: olfactory receptor activity (GO:0004984);; Cellular Component: plasma membrane (GO:0005886);; Biological Process: G-protein coupled receptor signaling pathway (GO:0007186);; Cellular Component: integral component of membrane (GO:0016021);; Biological Process: detection of chemical stimulus involved in senso…	K04257|2.23379e-158|ggo:101142628|olfactory receptor 1P1-like; K04257 olfactory receptor (A)	--	--	Olfactory receptor 1E1 GN=OR1E1 OS=Pan troglodytes (Chimpanzee) PE=3 SV=1	Olfactory receptor {ECO:0000256|RuleBase:RU000688} (Fragment) OS=Felis catus (Cat) PE=3 SV=1	PREDICTED: olfactory receptor 1P1-like [Leptonychotes weddellii]
gene4243	--	--	Molecular Function: G-protein coupled receptor activity (GO:0004930);; Molecular Function: olfactory receptor activity (GO:0004984);; Cellular Component: plasma membrane (GO:0005886);; Biological Process: G-protein coupled receptor signaling pathway (GO:0007186);; Cellular Component: integral component of membrane (GO:0016021);; Biological Process: detection of chemical stimulus involved in senso…	K04257|4.7039e-171|umr:103656332|olfactory receptor 2T11; K04257 olfactory receptor (A)	--	--	Olfactory receptor-like protein OLF3 OS=Canis familiaris (Dog) PE=3 SV=1	Olfactory receptor {ECO:0000256|RuleBase:RU000688} OS=Canis familiaris (Dog) PE=3 SV=2	PREDICTED: olfactory receptor 2T11 [Ursus maritimus]
gene8464	--	--	Molecular Function: G-protein coupled receptor activity (GO:0004930);; Molecular Function: olfactory receptor activity (GO:0004984);; Cellular Component: plasma membrane (GO:0005886);; Cellular Component: integral component of membrane (GO:0016021);;	K04257|0|oas:101121860|olfactory receptor 11H6-like; K04257 olfactory receptor (A)	--	--	Olfactory receptor-like protein DTMT OS=Canis familiaris (Dog) PE=3 SV=1	Olfactory receptor {ECO:0000256|RuleBase:RU000688} OS=Myotis davidii (David's myotis) PE=3 SV=1	PREDICTED: olfactory receptor 11H6-like [Ovis aries]
gene6916	--	--	Molecular Function: G-protein coupled receptor activity (GO:0004930);; Molecular Function: olfactory receptor activity (GO:0004984);; Cellular Component: plasma membrane (GO:0005886);; Biological Process: G-protein coupled receptor signaling pathway (GO:0007186);; Cellular Component: integral component of membrane (GO:0016021);; Biological Process: detection of chemical stimulus involved in senso…	K04257|0|aml:100475220|olfactory receptor 11A1-like; K04257 olfactory receptor (A)	--	--	Olfactory receptor 1G1 GN=OR1G1 OS=Gorilla gorilla gorilla (Lowland gorilla) PE=3 SV=1	Olfactory receptor {ECO:0000256|RuleBase:RU000688} (Fragment) OS=Ailuropoda melanoleuca (Giant panda) PE=3 SV=1	PREDICTED: olfactory receptor 11L1-like [Condylura cristata]
gene5548	--	--	Molecular Function: G-protein coupled receptor activity (GO:0004930);; Molecular Function: olfactory receptor activity (GO:0004984);; Cellular Component: plasma membrane (GO:0005886);; Biological Process: G-protein coupled receptor signaling pathway (GO:0007186);; Cellular Component: integral component of membrane (GO:0016021);; Biological Process: detection of chemical stimulus involved in senso…	K04257|0|tup:102502342|olfactory receptor 51I2-like; K04257 olfactory receptor (A)	--	--	Olfactory receptor 1E1 GN=OR1E1 OS=Pan troglodytes (Chimpanzee) PE=3 SV=1	Olfactory receptor {ECO:0000256|RuleBase:RU000688} OS=Tupaia chinensis (Chinese tree shrew) PE=3 SV=1	PREDICTED: olfactory receptor 51I2-like [Ceratotherium simum simum]
gene9426	--	--	Molecular Function: G-protein coupled receptor activity (GO:0004930);; Molecular Function: olfactory receptor activity (GO:0004984);; Cellular Component: plasma membrane (GO:0005886);; Biological Process: G-protein coupled receptor signaling pathway (GO:0007186);; Cellular Component: integral component of membrane (GO:0016021);; Biological Process: detection of chemical stimulus involved in senso…	K04257|1.72589e-139|ecb:100071756|olfactory receptor 6M1-like; K04257 olfactory receptor (A)	--	--	Olfactory receptor-like protein OLF3 OS=Canis familiaris (Dog) PE=3 SV=1	Olfactory receptor {ECO:0000256|RuleBase:RU000688} OS=Equus caballus (Horse) PE=3 SV=1	PREDICTED: olfactory receptor 6M1-like [Equus caballus]
gene11450	--	--	Molecular Function: G-protein coupled receptor activity (GO:0004930);; Molecular Function: olfactory receptor activity (GO:0004984);; Cellular Component: plasma membrane (GO:0005886);; Biological Process: G-protein coupled receptor signaling pathway (GO:0007186);; Cellular Component: integral component of membrane (GO:0016021);; Biological Process: detection of chemical stimulus involved in senso…	K04257|0|aml:100474329|olfactory receptor 6K6-like; K04257 olfactory receptor (A)	--	--	Olfactory receptor 1E2 GN=OR1E2 OS=Gorilla gorilla gorilla (Lowland gorilla) PE=3 SV=1	Olfactory receptor {ECO:0000256|RuleBase:RU000688} (Fragment) OS=Ailuropoda melanoleuca (Giant panda) PE=3 SV=1	PREDICTED: olfactory receptor 6K6-like [Condylura cristata]
gene6191	--	--	Molecular Function: G-protein coupled receptor activity (GO:0004930);; Molecular Function: olfactory receptor activity (GO:0004984);; Cellular Component: plasma membrane (GO:0005886);; Biological Process: G-protein coupled receptor signaling pathway (GO:0007186);; Cellular Component: integral component of membrane (GO:0016021);; Biological Process: detection of chemical stimulus involved in senso…	K04257|1.26866e-171|chx:102168819|olfactory receptor 49-like; K04257 olfactory receptor (A)	--	--	Olfactory receptor 1G1 GN=OR1G1 OS=Gorilla gorilla gorilla (Lowland gorilla) PE=3 SV=1	Olfactory receptor {ECO:0000256|RuleBase:RU000688} OS=Ovis aries (Sheep) PE=3 SV=1	PREDICTED: olfactory receptor 6M1-like [Odobenus rosmarus divergens]
gene25156	--	--	Molecular Function: G-protein coupled receptor activity (GO:0004930);; Molecular Function: olfactory receptor activity (GO:0004984);; Cellular Component: plasma membrane (GO:0005886);; Cellular Component: integral component of membrane (GO:0016021);;	K04257|1.13208e-176|ecb:100071772|olfactory receptor 8D4-like; K04257 olfactory receptor (A)	--	--	Olfactory receptor-like protein OLF2 OS=Canis familiaris (Dog) PE=3 SV=1	Olfactory receptor {ECO:0000256|RuleBase:RU000688} OS=Equus caballus (Horse) PE=3 SV=1	PREDICTED: olfactory receptor 8D4-like [Equus przewalskii]
gene5551	--	--	Molecular Function: G-protein coupled receptor activity (GO:0004930);; Molecular Function: olfactory receptor activity (GO:0004984);; Cellular Component: plasma membrane (GO:0005886);; Biological Process: G-protein coupled receptor signaling pathway (GO:0007186);; Cellular Component: integral component of membrane (GO:0016021);; Biological Process: detection of chemical stimulus involved in senso…	K04257|0|bta:788295|OR52D1; olfactory receptor, family 52, subfamily D, member 1; K04257 olfactory receptor (A)	--	--	Olfactory receptor 1D2 GN=OR1D2 OS=Gorilla gorilla gorilla (Lowland gorilla) PE=3 SV=1	Olfactory receptor {ECO:0000256|RuleBase:RU000688} OS=Canis familiaris (Dog) PE=3 SV=1	olfactory receptor OR0130 [Canis lupus familiaris]
gene15233	--	--	Molecular Function: G-protein coupled receptor activity (GO:0004930);; Molecular Function: olfactory receptor activity (GO:0004984);; Cellular Component: plasma membrane (GO:0005886);; Biological Process: G-protein coupled receptor signaling pathway (GO:0007186);; Cellular Component: integral component of membrane (GO:0016021);; Biological Process: detection of chemical stimulus involved in senso…	K04257|2.58325e-167|chx:102175117|olfactory receptor 2G3-like; K04257 olfactory receptor (A)	--	--	Olfactory receptor-like protein OLF3 OS=Canis familiaris (Dog) PE=3 SV=1	Olfactory receptor {ECO:0000256|RuleBase:RU000688} (Fragment) OS=Felis catus (Cat) PE=3 SV=1	PREDICTED: olfactory receptor 2G3-like [Capra hircus]
gene15545	--	--	Molecular Function: G-protein coupled receptor activity (GO:0004930);; Molecular Function: olfactory receptor activity (GO:0004984);; Cellular Component: plasma membrane (GO:0005886);; Biological Process: G-protein coupled receptor signaling pathway (GO:0007186);; Cellular Component: integral component of membrane (GO:0016021);; Biological Process: detection of chemical stimulus involved in senso…	K04257|4.4592e-129|bom:102272772|olfactory receptor 51V1-like; K04257 olfactory receptor (A)	--	--	Olfactory receptor 3A3 GN=OR3A3 OS=Pan troglodytes (Chimpanzee) PE=3 SV=1	Olfactory receptor {ECO:0000256|RuleBase:RU000688} (Fragment) OS=Canis familiaris (Dog) PE=3 SV=1	PREDICTED: olfactory receptor 51V1-like [Bos mutus]
gene20118	--	--	Molecular Function: G-protein coupled receptor activity (GO:0004930);; Molecular Function: olfactory receptor activity (GO:0004984);; Cellular Component: plasma membrane (GO:0005886);; Biological Process: G-protein coupled receptor signaling pathway (GO:0007186);; Cellular Component: integral component of membrane (GO:0016021);; Biological Process: detection of chemical stimulus involved in senso…	--	--	--	Olfactory receptor-like protein OLF1 OS=Canis familiaris (Dog) PE=3 SV=1	Olfactory receptor {ECO:0000256|RuleBase:RU000688} OS=Tupaia chinensis (Chinese tree shrew) PE=3 SV=1	PREDICTED: olfactory receptor 1020-like [Dasypus novemcinctus]
gene4236	--	--	--	K04257|7.97605e-138|cfr:102513226|olfactory receptor 14C36-like; K04257 olfactory receptor (A)	--	--	Olfactory receptor 1G1 GN=OR1G1 OS=Gorilla gorilla gorilla (Lowland gorilla) PE=3 SV=1	Olfactory receptor 14C36-like protein {ECO:0000313|EMBL:EPY85959.1} OS=Camelus ferus (Wild Bactrian camel) PE=4 SV=1	PREDICTED: olfactory receptor 14C36-like [Condylura cristata]
gene11464	--	--	Molecular Function: G-protein coupled receptor activity (GO:0004930);; Molecular Function: olfactory receptor activity (GO:0004984);; Cellular Component: plasma membrane (GO:0005886);; Cellular Component: integral component of membrane (GO:0016021);;	K04257|0|ssc:100626599|olfactory receptor 10R2-like; K04257 olfactory receptor (A)	--	--	Olfactory receptor-like protein OLF3 OS=Canis familiaris (Dog) PE=3 SV=1	Olfactory receptor {ECO:0000256|RuleBase:RU000688} (Fragment) OS=Mustela putorius furo (European domestic ferret) PE=3 SV=1	PREDICTED: olfactory receptor 10R2-like [Leptonychotes weddellii]
gene8154	--	--	--	K04257|2.36296e-179|cfa:482228|cOR2T15; cOR2T15 olfactory receptor family 2 subfamily T-like; K04257 olfactory receptor (A)	--	--	Olfactory receptor-like protein OLF3 OS=Canis familiaris (Dog) PE=3 SV=1	Olfactory receptor {ECO:0000256|RuleBase:RU000688} OS=Canis familiaris (Dog) PE=3 SV=1	PREDICTED: olfactory receptor 2T33 [Canis lupus familiaris]
gene15491	--	--	Molecular Function: G-protein coupled receptor activity (GO:0004930);; Molecular Function: olfactory receptor activity (GO:0004984);; Cellular Component: plasma membrane (GO:0005886);; Biological Process: G-protein coupled receptor signaling pathway (GO:0007186);; Cellular Component: integral component of membrane (GO:0016021);; Biological Process: detection of chemical stimulus involved in senso…	K04257|2.14587e-175|oas:101105023|olfactory receptor 10R2-like; K04257 olfactory receptor (A)	--	--	Olfactory receptor-like protein OLF1 OS=Canis familiaris (Dog) PE=3 SV=1	Olfactory receptor Olr245-like protein {ECO:0000313|EMBL:EPY84033.1} OS=Camelus ferus (Wild Bactrian camel) PE=4 SV=1	PREDICTED: olfactory receptor 10T2-like [Camelus dromedarius]
gene19660	--	--	Molecular Function: G-protein coupled receptor activity (GO:0004930);; Molecular Function: olfactory receptor activity (GO:0004984);; Biological Process: G-protein coupled receptor signaling pathway (GO:0007186);; Cellular Component: integral component of membrane (GO:0016021);; Biological Process: detection of chemical stimulus involved in sensory perception of smell (GO:0050911);;	K04257|0|chx:102180061|olfactory receptor 51G2-like; K04257 olfactory receptor (A)	--	--	Olfactory receptor 1E1 GN=OR1E1 OS=Pan troglodytes (Chimpanzee) PE=3 SV=1	Olfactory receptor {ECO:0000256|RuleBase:RU000688} OS=Ovis aries (Sheep) PE=3 SV=1	PREDICTED: olfactory receptor 51G2-like [Capra hircus]
gene26187	--	--	Molecular Function: G-protein coupled receptor activity (GO:0004930);; Molecular Function: olfactory receptor activity (GO:0004984);; Cellular Component: plasma membrane (GO:0005886);; Biological Process: G-protein coupled receptor signaling pathway (GO:0007186);; Cellular Component: integral component of membrane (GO:0016021);; Biological Process: detection of chemical stimulus involved in senso…	K04257|0|cfa:482725|OR6B1; olfactory receptor, family 6, subfamily B, member 1; K04257 olfactory receptor (A)	--	--	Olfactory receptor 1G1 GN=OR1G1 OS=Gorilla gorilla gorilla (Lowland gorilla) PE=3 SV=1	Olfactory receptor {ECO:0000256|RuleBase:RU000688} OS=Canis familiaris (Dog) PE=3 SV=1	PREDICTED: LOW QUALITY PROTEIN: olfactory receptor 6B1 [Canis lupus familiaris]
gene25498	--	--	Molecular Function: G-protein coupled receptor activity (GO:0004930);; Molecular Function: olfactory receptor activity (GO:0004984);; Cellular Component: plasma membrane (GO:0005886);; Biological Process: G-protein coupled receptor signaling pathway (GO:0007186);; Cellular Component: integral component of membrane (GO:0016021);; Biological Process: detection of chemical stimulus involved in senso…	K04257|1.96847e-94|cfr:102520500|olfactory receptor 10H1-like; K04257 olfactory receptor (A)	--	--	Olfactory receptor-like protein OLF1 OS=Canis familiaris (Dog) PE=3 SV=1	Olfactory receptor 10H1 {ECO:0000313|EMBL:ELV13679.1} OS=Tupaia chinensis (Chinese tree shrew) PE=4 SV=1	PREDICTED: olfactory receptor 10H1-like [Trichechus manatus latirostris]
gene14991	--	--	Molecular Function: G-protein coupled receptor activity (GO:0004930);; Molecular Function: olfactory receptor activity (GO:0004984);; Cellular Component: plasma membrane (GO:0005886);; Biological Process: G-protein coupled receptor signaling pathway (GO:0007186);; Cellular Component: integral component of membrane (GO:0016021);; Biological Process: detection of chemical stimulus involved in senso…	K04257|2.77575e-151|ptg:102957082|olfactory receptor 2A12-like; K04257 olfactory receptor (A)	--	--	Olfactory receptor-like protein OLF3 OS=Canis familiaris (Dog) PE=3 SV=1	Uncharacterized protein {ECO:0000313|Ensembl:ENSLAFP00000026988} OS=Loxodonta africana (African elephant) PE=4 SV=1	PREDICTED: olfactory receptor 2A12-like [Echinops telfairi]
gene146	--	--	Molecular Function: G-protein coupled receptor activity (GO:0004930);; Molecular Function: olfactory receptor activity (GO:0004984);; Cellular Component: plasma membrane (GO:0005886);; Cellular Component: integral component of membrane (GO:0016021);;	K04257|1.55121e-177|ssc:100519461|olfactory receptor 2S2-like; K04257 olfactory receptor (A)	--	--	Olfactory receptor-like protein OLF3 OS=Canis familiaris (Dog) PE=3 SV=1	Olfactory receptor {ECO:0000256|RuleBase:RU000688} OS=Mustela putorius furo (European domestic ferret) PE=3 SV=1	PREDICTED: olfactory receptor 2S2-like [Mustela putorius furo]
gene25877	--	--	--	K04257|5.10325e-93|umr:103680593|olfactory receptor 2AK2-like; K04257 olfactory receptor (A)	--	--	Olfactory receptor-like protein OLF3 OS=Canis familiaris (Dog) PE=3 SV=1	Olfactory receptor {ECO:0000256|RuleBase:RU000688} (Fragment) OS=Canis familiaris (Dog) PE=3 SV=2	PREDICTED: olfactory receptor 2AK2-like [Camelus dromedarius]
gene25958	--	--	--	K04257|9.76525e-167|ecb:100061851|olfactory receptor 13C3-like; K04257 olfactory receptor (A)	--	--	Olfactory receptor-like protein OLF3 OS=Canis familiaris (Dog) PE=3 SV=1	Olfactory receptor {ECO:0000256|RuleBase:RU000688} (Fragment) OS=Felis catus (Cat) PE=3 SV=1	PREDICTED: olfactory receptor 13C3-like [Equus caballus]
gene8550	--	--	Molecular Function: G-protein coupled receptor activity (GO:0004930);; Molecular Function: olfactory receptor activity (GO:0004984);; Cellular Component: plasma membrane (GO:0005886);; Biological Process: G-protein coupled receptor signaling pathway (GO:0007186);; Cellular Component: integral component of membrane (GO:0016021);; Biological Process: detection of chemical stimulus involved in senso…	K04257|0|myb:102244611|olfactory receptor 1030-like; K04257 olfactory receptor (A)	--	--	Olfactory receptor-like protein OLF1 OS=Canis familiaris (Dog) PE=3 SV=1	Olfactory receptor {ECO:0000256|RuleBase:RU000688} OS=Myotis brandtii (Brandt's bat) PE=3 SV=1	PREDICTED: olfactory receptor 1030-like [Myotis brandtii]
gene4257	--	--	--	K04257|1.77605e-153|cfr:102513226|olfactory receptor 14C36-like; K04257 olfactory receptor (A)	--	--	Olfactory receptor-like protein OLF1 OS=Canis familiaris (Dog) PE=3 SV=1	Olfactory receptor 14C36-like protein {ECO:0000313|EMBL:EPY85959.1} OS=Camelus ferus (Wild Bactrian camel) PE=4 SV=1	PREDICTED: olfactory receptor 14C36-like [Erinaceus europaeus]
gene12435	--	--	Molecular Function: G-protein coupled receptor activity (GO:0004930);; Molecular Function: olfactory receptor activity (GO:0004984);; Cellular Component: plasma membrane (GO:0005886);; Biological Process: G-protein coupled receptor signaling pathway (GO:0007186);; Cellular Component: integral component of membrane (GO:0016021);; Biological Process: detection of chemical stimulus involved in senso…	K04257|0|umr:103666227|olfactory receptor 8K3-like; K04257 olfactory receptor (A)	--	--	Olfactory receptor-like protein OLF2 OS=Canis familiaris (Dog) PE=3 SV=1	Uncharacterized protein {ECO:0000313|Ensembl:ENSBTAP00000033772} (Fragment) OS=Bos taurus (Bovine) PE=4 SV=2	PREDICTED: olfactory receptor 8K3-like [Ursus maritimus]
gene22508	--	--	Molecular Function: G-protein coupled receptor activity (GO:0004930);; Molecular Function: olfactory receptor activity (GO:0004984);; Cellular Component: plasma membrane (GO:0005886);; Cellular Component: integral component of membrane (GO:0016021);;	K04257|2.0541e-166|pale:102897533|olfactory receptor 51M1-like; K04257 olfactory receptor (A)	--	--	Olfactory receptor 1G1 GN=OR1G1 OS=Gorilla gorilla gorilla (Lowland gorilla) PE=3 SV=1	Olfactory receptor {ECO:0000256|RuleBase:RU000688} OS=Pteropus alecto (Black flying fox) PE=3 SV=1	PREDICTED: olfactory receptor 51M1-like [Vicugna pacos]
gene11668	--	--	--	K04257|1.11462e-148|tup:102489478|olfactory receptor 6C2-like; K04257 olfactory receptor (A)	--	--	Olfactory receptor 1G1 GN=OR1G1 OS=Gorilla gorilla gorilla (Lowland gorilla) PE=3 SV=1	Olfactory receptor {ECO:0000256|RuleBase:RU000688} OS=Tupaia chinensis (Chinese tree shrew) PE=3 SV=1	PREDICTED: olfactory receptor 6C2-like [Mustela putorius furo]
gene23100	--	--	Molecular Function: G-protein coupled receptor activity (GO:0004930);; Molecular Function: olfactory receptor activity (GO:0004984);; Cellular Component: plasma membrane (GO:0005886);; Biological Process: G-protein coupled receptor signaling pathway (GO:0007186);; Cellular Component: integral component of membrane (GO:0016021);; Biological Process: detection of chemical stimulus involved in senso…	K04257|0|ptg:102970267|olfactory receptor 4E1-like; K04257 olfactory receptor (A)	--	--	Olfactory receptor-like protein OLF1 OS=Canis familiaris (Dog) PE=3 SV=1	Olfactory receptor {ECO:0000256|RuleBase:RU000688} (Fragment) OS=Felis catus (Cat) PE=3 SV=1	PREDICTED: olfactory receptor 4E1-like [Mustela putorius furo]
gene26777	--	--	Molecular Function: G-protein coupled receptor activity (GO:0004930);; Molecular Function: olfactory receptor activity (GO:0004984);; Cellular Component: plasma membrane (GO:0005886);; Cellular Component: integral component of membrane (GO:0016021);;	K04257|0|fca:101098304|olfactory receptor 4K5-like; K04257 olfactory receptor (A)	--	--	Olfactory receptor-like protein OLF1 OS=Canis familiaris (Dog) PE=3 SV=1	Olfactory receptor {ECO:0000256|RuleBase:RU000688} OS=Felis catus (Cat) PE=3 SV=1	PREDICTED: olfactory receptor 4K5 [Felis catus]
gene17898	--	--	Molecular Function: G-protein coupled receptor activity (GO:0004930);; Molecular Function: olfactory receptor activity (GO:0004984);; Biological Process: G-protein coupled receptor signaling pathway (GO:0007186);; Cellular Component: integral component of membrane (GO:0016021);; Biological Process: detection of chemical stimulus involved in sensory perception of smell (GO:0050911);;	K04257|1.3991e-145|tup:102481199|olfactory receptor 1K1-like; K04257 olfactory receptor (A)	--	--	Olfactory receptor-like protein DTMT OS=Canis familiaris (Dog) PE=3 SV=1	Olfactory receptor {ECO:0000256|RuleBase:RU000688} OS=Tupaia chinensis (Chinese tree shrew) PE=3 SV=1	PREDICTED: olfactory receptor 1K1-like [Tupaia chinensis]
gene23893	--	--	Molecular Function: G-protein coupled receptor activity (GO:0004930);; Molecular Function: olfactory receptor activity (GO:0004984);; Cellular Component: plasma membrane (GO:0005886);; Biological Process: G-protein coupled receptor signaling pathway (GO:0007186);; Cellular Component: integral component of membrane (GO:0016021);; Biological Process: detection of chemical stimulus involved in senso…	K04257|1.70577e-75|ptg:102964569|olfactory receptor 9Q1-like; K04257 olfactory receptor (A)	--	--	Olfactory receptor-like protein DTMT OS=Canis familiaris (Dog) PE=3 SV=1	Olfactory receptor {ECO:0000256|RuleBase:RU000688} (Fragment) OS=Felis catus (Cat) PE=3 SV=1	PREDICTED: olfactory receptor 9Q1-like [Chrysochloris asiatica]
gene19668	--	--	Molecular Function: G-protein coupled receptor activity (GO:0004930);; Molecular Function: olfactory receptor activity (GO:0004984);; Cellular Component: plasma membrane (GO:0005886);; Biological Process: G-protein coupled receptor signaling pathway (GO:0007186);; Cellular Component: integral component of membrane (GO:0016021);; Biological Process: detection of chemical stimulus involved in senso…	K04257|0|pale:102879540|olfactory receptor 52R1-like; K04257 olfactory receptor (A)	--	--	Olfactory receptor 1E2 GN=OR1E2 OS=Gorilla gorilla gorilla (Lowland gorilla) PE=3 SV=1	Olfactory receptor {ECO:0000256|RuleBase:RU000688} OS=Pteropus alecto (Black flying fox) PE=3 SV=1	PREDICTED: olfactory receptor 52R1-like [Pteropus alecto]
gene25904	--	--	--	--	--	--	Olfactory receptor-like protein DTMT OS=Canis familiaris (Dog) PE=3 SV=1	Uncharacterized protein {ECO:0000313|Ensembl:ENSAMEP00000020327} (Fragment) OS=Ailuropoda melanoleuca (Giant panda) PE=4 SV=1	hypothetical protein PANDA_021598 [Ailuropoda melanoleuca]
gene12437	--	--	Molecular Function: G-protein coupled receptor activity (GO:0004930);; Molecular Function: olfactory receptor activity (GO:0004984);; Cellular Component: plasma membrane (GO:0005886);; Biological Process: G-protein coupled receptor signaling pathway (GO:0007186);; Cellular Component: integral component of membrane (GO:0016021);; Biological Process: detection of chemical stimulus involved in senso…	K04257|1.07141e-170|fca:101082183|olfactory receptor 8K3-like; K04257 olfactory receptor (A)	--	--	Olfactory receptor-like protein OLF2 OS=Canis familiaris (Dog) PE=3 SV=1	Olfactory receptor {ECO:0000256|RuleBase:RU000688} OS=Felis catus (Cat) PE=3 SV=1	PREDICTED: olfactory receptor 8K3-like [Felis catus]
gene13711	--	--	Molecular Function: G-protein coupled receptor activity (GO:0004930);; Molecular Function: olfactory receptor activity (GO:0004984);; Cellular Component: plasma membrane (GO:0005886);; Biological Process: G-protein coupled receptor signaling pathway (GO:0007186);; Cellular Component: integral component of membrane (GO:0016021);; Biological Process: detection of chemical stimulus involved in senso…	K04257|1.36836e-159|myd:102770414|olfactory receptor 56A1-like; K04257 olfactory receptor (A)	--	--	Olfactory receptor 1G1 GN=OR1G1 OS=Gorilla gorilla gorilla (Lowland gorilla) PE=3 SV=1	Olfactory receptor 56A1 {ECO:0000313|EMBL:ELK25414.1} OS=Myotis davidii (David's myotis) PE=4 SV=1	PREDICTED: olfactory receptor 56A1 [Orycteropus afer afer]
gene25968	--	--	--	K04257|9.59943e-62|umr:103676329|olfactory receptor 7G2-like; K04257 olfactory receptor (A)	--	--	Olfactory receptor-like protein OLF4 OS=Canis familiaris (Dog) PE=3 SV=1	Olfactory receptor {ECO:0000256|RuleBase:RU000688} (Fragment) OS=Enhydra lutris (Sea otter) PE=3 SV=1	olfactory receptor family 7 [Enhydra lutris]
gene20123	--	--	Molecular Function: G-protein coupled receptor activity (GO:0004930);; Molecular Function: olfactory receptor activity (GO:0004984);; Cellular Component: plasma membrane (GO:0005886);; Biological Process: G-protein coupled receptor signaling pathway (GO:0007186);; Cellular Component: integral component of membrane (GO:0016021);; Biological Process: detection of chemical stimulus involved in senso…	K04257|3.30844e-135|cfa:482241|COR2T18; olfactory receptor family 2 subfamily T member 18; K04257 olfactory receptor (A)	--	--	Olfactory receptor-like protein OLF3 OS=Canis familiaris (Dog) PE=3 SV=1	Olfactory receptor {ECO:0000256|RuleBase:RU000688} OS=Canis familiaris (Dog) PE=3 SV=2	olfactory receptor family 2 subfamily T member 18 [Canis lupus familiaris]
gene24011	--	--	Molecular Function: G-protein coupled receptor activity (GO:0004930);; Molecular Function: olfactory receptor activity (GO:0004984);; Cellular Component: plasma membrane (GO:0005886);; Biological Process: G-protein coupled receptor signaling pathway (GO:0007186);; Cellular Component: integral component of membrane (GO:0016021);; Biological Process: detection of chemical stimulus involved in senso…	K04257|0|umr:103666226|olfactory receptor 8K3-like; K04257 olfactory receptor (A)	--	--	Olfactory receptor-like protein OLF2 OS=Canis familiaris (Dog) PE=3 SV=1	Olfactory receptor {ECO:0000256|RuleBase:RU000688} OS=Mustela putorius furo (European domestic ferret) PE=3 SV=1	PREDICTED: olfactory receptor 8K3-like [Ursus maritimus]
gene15420	--	--	Molecular Function: G-protein coupled receptor activity (GO:0004930);; Molecular Function: olfactory receptor activity (GO:0004984);; Cellular Component: plasma membrane (GO:0005886);; Biological Process: G-protein coupled receptor signaling pathway (GO:0007186);; Cellular Component: integral component of membrane (GO:0016021);; Biological Process: detection of chemical stimulus involved in senso…	K04257|1.64432e-151|cfa:483506|OR9G4, cOR9G4; cOR9G4 olfactory receptor family 9 subfamily G-like; K04257 olfactory receptor (A)	--	--	Olfactory receptor-like protein OLF1 OS=Canis familiaris (Dog) PE=3 SV=1	Olfactory receptor {ECO:0000256|RuleBase:RU000688} (Fragment) OS=Canis familiaris (Dog) PE=3 SV=1	PREDICTED: olfactory receptor 9G4 [Canis lupus familiaris]
gene25839	--	--	--	--	--	--	Olfactory receptor 1E1 GN=OR1E1 OS=Pan troglodytes (Chimpanzee) PE=3 SV=1	Olfactory receptor {ECO:0000256|RuleBase:RU000688} OS=Equus caballus (Horse) PE=3 SV=1	PREDICTED: olfactory receptor 52B4-like [Equus caballus]
gene21410	--	--	Molecular Function: G-protein coupled receptor activity (GO:0004930);; Molecular Function: olfactory receptor activity (GO:0004984);; Cellular Component: plasma membrane (GO:0005886);; Biological Process: G-protein coupled receptor signaling pathway (GO:0007186);; Cellular Component: integral component of membrane (GO:0016021);; Biological Process: detection of chemical stimulus involved in senso…	K04257|0|umr:103681184|olfactory receptor 52E4-like; K04257 olfactory receptor (A)	--	--	Olfactory receptor-like protein OLF3 OS=Canis familiaris (Dog) PE=3 SV=1	Olfactory receptor {ECO:0000256|RuleBase:RU000688} (Fragment) OS=Mustela putorius furo (European domestic ferret) PE=3 SV=1	PREDICTED: olfactory receptor 52E2-like [Mustela putorius furo]
gene15267	--	--	Molecular Function: G-protein coupled receptor activity (GO:0004930);; Molecular Function: olfactory receptor activity (GO:0004984);; Cellular Component: plasma membrane (GO:0005886);; Biological Process: G-protein coupled receptor signaling pathway (GO:0007186);; Cellular Component: integral component of membrane (GO:0016021);; Biological Process: detection of chemical stimulus involved in senso…	K04257|5.95828e-120|umr:103656258|olfactory receptor 145-like; K04257 olfactory receptor (A)	--	--	Olfactory receptor-like protein OLF2 OS=Canis familiaris (Dog) PE=3 SV=1	Olfactory receptor {ECO:0000256|RuleBase:RU000688} OS=Mustela putorius furo (European domestic ferret) PE=3 SV=1	PREDICTED: olfactory receptor 145-like [Ursus maritimus]
gene20971	--	--	Molecular Function: G-protein coupled receptor activity (GO:0004930);; Molecular Function: olfactory receptor activity (GO:0004984);; Cellular Component: plasma membrane (GO:0005886);; Biological Process: G-protein coupled receptor signaling pathway (GO:0007186);; Cellular Component: integral component of membrane (GO:0016021);; Biological Process: detection of chemical stimulus involved in senso…	--	--	--	Olfactory receptor-like protein OLF2 OS=Canis familiaris (Dog) PE=3 SV=1	Olfactory receptor {ECO:0000256|RuleBase:RU000688} OS=Canis familiaris (Dog) PE=3 SV=1	PREDICTED: olfactory receptor-like protein OLF2-like [Odobenus rosmarus divergens]
gene25834	--	--	--	K04257|4.47518e-160|ssc:100517176|olfactory receptor 52K1-like; K04257 olfactory receptor (A)	--	--	Olfactory receptor 1D2 GN=OR1D2 OS=Gorilla gorilla gorilla (Lowland gorilla) PE=3 SV=1	Olfactory receptor {ECO:0000256|RuleBase:RU000688} (Fragment) OS=Sus scrofa (Pig) PE=3 SV=1	PREDICTED: olfactory receptor 52K1-like [Sus scrofa]
gene15518	--	--	Molecular Function: G-protein coupled receptor activity (GO:0004930);; Molecular Function: olfactory receptor activity (GO:0004984);; Cellular Component: plasma membrane (GO:0005886);; Biological Process: G-protein coupled receptor signaling pathway (GO:0007186);; Cellular Component: integral component of membrane (GO:0016021);; Biological Process: detection of chemical stimulus involved in senso…	K04257|6.55334e-134|ptg:102970450|olfactory receptor 4P4-like; K04257 olfactory receptor (A)	--	--	Olfactory receptor 1G1 GN=OR1G1 OS=Gorilla gorilla gorilla (Lowland gorilla) PE=3 SV=1	Olfactory receptor {ECO:0000256|RuleBase:RU000688} OS=Equus caballus (Horse) PE=3 SV=1	PREDICTED: olfactory receptor 4P4-like [Leptonychotes weddellii]
gene4206	--	--	Molecular Function: G-protein coupled receptor activity (GO:0004930);; Molecular Function: olfactory receptor activity (GO:0004984);; Cellular Component: plasma membrane (GO:0005886);; Biological Process: G-protein coupled receptor signaling pathway (GO:0007186);; Cellular Component: integral component of membrane (GO:0016021);; Biological Process: detection of chemical stimulus involved in senso…	K04257|0|ecb:100053865|olfactory receptor 51G2-like; K04257 olfactory receptor (A)	--	--	Olfactory receptor 1E1 GN=OR1E1 OS=Pan troglodytes (Chimpanzee) PE=3 SV=1	Olfactory receptor 51G2-like protein {ECO:0000313|EMBL:EPY82484.1} OS=Camelus ferus (Wild Bactrian camel) PE=4 SV=1	PREDICTED: olfactory receptor 51G2-like [Equus przewalskii]
gene15381	--	--	Molecular Function: G-protein coupled receptor activity (GO:0004930);; Molecular Function: olfactory receptor activity (GO:0004984);; Cellular Component: plasma membrane (GO:0005886);; Biological Process: G-protein coupled receptor signaling pathway (GO:0007186);; Cellular Component: integral component of membrane (GO:0016021);; Biological Process: detection of chemical stimulus involved in senso…	K04257|4.25071e-132|ptg:102960288|olfactory receptor 8S1-like; K04257 olfactory receptor (A)	--	--	Olfactory receptor-like protein OLF1 OS=Canis familiaris (Dog) PE=3 SV=1	Olfactory receptor {ECO:0000256|RuleBase:RU000688} OS=Felis catus (Cat) PE=3 SV=1	PREDICTED: olfactory receptor 8S1-like [Panthera tigris altaica]
gene13614	--	--	Molecular Function: G-protein coupled receptor activity (GO:0004930);; Molecular Function: olfactory receptor activity (GO:0004984);; Cellular Component: plasma membrane (GO:0005886);; Biological Process: G-protein coupled receptor signaling pathway (GO:0007186);; Cellular Component: integral component of membrane (GO:0016021);; Biological Process: detection of chemical stimulus involved in senso…	K04257|1.11136e-177|ssc:100524691|olfactory receptor 11H12-like; K04257 olfactory receptor (A)	--	--	Olfactory receptor 1A1 GN=OR1A1 OS=Gorilla gorilla gorilla (Lowland gorilla) PE=3 SV=1	Olfactory receptor {ECO:0000256|RuleBase:RU000688} OS=Sus scrofa (Pig) PE=3 SV=2	PREDICTED: olfactory receptor 11H12-like [Sus scrofa]
gene14428	--	--	Molecular Function: G-protein coupled receptor activity (GO:0004930);; Molecular Function: olfactory receptor activity (GO:0004984);; Cellular Component: plasma membrane (GO:0005886);; Biological Process: G-protein coupled receptor signaling pathway (GO:0007186);; Cellular Component: integral component of membrane (GO:0016021);; Biological Process: detection of chemical stimulus involved in senso…	K04257|1.45813e-177|aml:100471980|olfactory receptor 4D6-like; K04257 olfactory receptor (A)	--	--	Olfactory receptor 3A2 GN=OR3A2 OS=Pan troglodytes (Chimpanzee) PE=3 SV=1	Olfactory receptor {ECO:0000256|RuleBase:RU000688} OS=Mustela putorius furo (European domestic ferret) PE=3 SV=1	PREDICTED: olfactory receptor 4D6-like [Leptonychotes weddellii]
gene9083	--	--	Molecular Function: G-protein coupled receptor activity (GO:0004930);; Molecular Function: olfactory receptor activity (GO:0004984);; Cellular Component: plasma membrane (GO:0005886);; Biological Process: G-protein coupled receptor signaling pathway (GO:0007186);; Cellular Component: integral component of membrane (GO:0016021);; Biological Process: detection of chemical stimulus involved in senso…	K04257|0|ecb:100051498|olfactory receptor 2T4-like; K04257 olfactory receptor (A)	--	--	Olfactory receptor-like protein OLF2 OS=Canis familiaris (Dog) PE=3 SV=1	Olfactory receptor {ECO:0000256|RuleBase:RU000688} OS=Tupaia chinensis (Chinese tree shrew) PE=3 SV=1	PREDICTED: olfactory receptor 2T4-like [Condylura cristata]
gene15187	--	--	Molecular Function: G-protein coupled receptor activity (GO:0004930);; Molecular Function: olfactory receptor activity (GO:0004984);; Biological Process: G-protein coupled receptor signaling pathway (GO:0007186);; Cellular Component: integral component of membrane (GO:0016021);; Biological Process: detection of chemical stimulus involved in sensory perception of smell (GO:0050911);;	K04257|3.54568e-138|umr:103680345|olfactory receptor 2T27-like; K04257 olfactory receptor (A)	--	--	Olfactory receptor-like protein OLF3 OS=Canis familiaris (Dog) PE=3 SV=1	Olfactory receptor {ECO:0000256|RuleBase:RU000688} (Fragment) OS=Loxodonta africana (African elephant) PE=3 SV=1	PREDICTED: olfactory receptor 2T27-like [Sorex araneus]
gene26466	--	--	--	K04257|3.08658e-148|mmu:258549|Olfr798, MOR108-1; olfactory receptor 798; K04257 olfactory receptor (A)	--	--	Olfactory receptor-like protein OLF3 OS=Canis familiaris (Dog) PE=3 SV=1	Olfactory receptor {ECO:0000256|RuleBase:RU000688} OS=Mustela putorius furo (European domestic ferret) PE=3 SV=1	PREDICTED: olfactory receptor 6C76-like [Mustela putorius furo]
gene8783	--	--	Molecular Function: G-protein coupled receptor activity (GO:0004930);; Molecular Function: olfactory receptor activity (GO:0004984);; Cellular Component: plasma membrane (GO:0005886);; Biological Process: G-protein coupled receptor signaling pathway (GO:0007186);; Cellular Component: integral component of membrane (GO:0016021);; Biological Process: detection of chemical stimulus involved in senso…	--	--	--	Olfactory receptor-like protein OLF2 OS=Canis familiaris (Dog) PE=3 SV=1	Olfactory receptor {ECO:0000256|RuleBase:RU000688} (Fragment) OS=Ailuropoda melanoleuca (Giant panda) PE=3 SV=1	PREDICTED: olfactory receptor 5W2-like [Mustela putorius furo]
gene19512	--	--	Molecular Function: G-protein coupled receptor activity (GO:0004930);; Molecular Function: olfactory receptor activity (GO:0004984);; Cellular Component: plasma membrane (GO:0005886);; Cellular Component: integral component of membrane (GO:0016021);;	K04257|5.88811e-149|cfr:102513226|olfactory receptor 14C36-like; K04257 olfactory receptor (A)	--	--	Olfactory receptor-like protein OLF1 OS=Canis familiaris (Dog) PE=3 SV=1	Olfactory receptor 14C36-like protein {ECO:0000313|EMBL:EPY85959.1} OS=Camelus ferus (Wild Bactrian camel) PE=4 SV=1	PREDICTED: olfactory receptor 14C36-like [Condylura cristata]
gene19725	--	--	Molecular Function: G-protein coupled receptor activity (GO:0004930);; Molecular Function: olfactory receptor activity (GO:0004984);; Biological Process: G-protein coupled receptor signaling pathway (GO:0007186);; Cellular Component: integral component of membrane (GO:0016021);; Biological Process: detection of chemical stimulus involved in sensory perception of smell (GO:0050911);;	K04257|0|myb:102238875|olfactory receptor 51L1-like; K04257 olfactory receptor (A)	--	--	Olfactory receptor 1E1 GN=OR1E1 OS=Pan troglodytes (Chimpanzee) PE=3 SV=1	Olfactory receptor {ECO:0000256|RuleBase:RU000688} OS=Ailuropoda melanoleuca (Giant panda) PE=3 SV=1	PREDICTED: olfactory receptor 51G2-like [Mustela putorius furo]
gene13523	--	--	Molecular Function: G-protein coupled receptor activity (GO:0004930);; Molecular Function: olfactory receptor activity (GO:0004984);; Cellular Component: plasma membrane (GO:0005886);; Cellular Component: integral component of membrane (GO:0016021);;	K04257|0|umr:103681228|olfactory receptor 51G1-like; K04257 olfactory receptor (A)	--	--	Olfactory receptor 1E1 GN=OR1E1 OS=Pan troglodytes (Chimpanzee) PE=3 SV=1	Olfactory receptor {ECO:0000256|RuleBase:RU000688} OS=Ailuropoda melanoleuca (Giant panda) PE=3 SV=1	PREDICTED: olfactory receptor 51G1-like [Ursus maritimus]
gene14544	--	--	Molecular Function: G-protein coupled receptor activity (GO:0004930);; Molecular Function: olfactory receptor activity (GO:0004984);; Cellular Component: plasma membrane (GO:0005886);; Cellular Component: integral component of membrane (GO:0016021);;	K04257|1.08314e-122|bta:526713|olfactory receptor 6C2; K04257 olfactory receptor (A)	--	--	Olfactory receptor 1A1 GN=OR1A1 OS=Pan troglodytes (Chimpanzee) PE=3 SV=1	Olfactory receptor {ECO:0000256|RuleBase:RU000688} (Fragment) OS=Bos taurus (Bovine) PE=3 SV=1	PREDICTED: olfactory receptor 6C2 [Bos taurus]
gene23895	--	--	Molecular Function: G-protein coupled receptor activity (GO:0004930);; Molecular Function: olfactory receptor activity (GO:0004984);; Cellular Component: plasma membrane (GO:0005886);; Biological Process: G-protein coupled receptor signaling pathway (GO:0007186);; Cellular Component: integral component of membrane (GO:0016021);; Biological Process: detection of chemical stimulus involved in senso…	K04257|0|tup:102497894|olfactory receptor 9I1-like; K04257 olfactory receptor (A)	--	--	Olfactory receptor-like protein OLF2 OS=Canis familiaris (Dog) PE=3 SV=1	Olfactory receptor {ECO:0000256|RuleBase:RU000688} OS=Tupaia chinensis (Chinese tree shrew) PE=3 SV=1	PREDICTED: olfactory receptor 9I1-like [Tupaia chinensis]
gene12607	--	--	Molecular Function: G-protein coupled receptor activity (GO:0004930);; Molecular Function: olfactory receptor activity (GO:0004984);; Cellular Component: plasma membrane (GO:0005886);; Biological Process: G-protein coupled receptor signaling pathway (GO:0007186);; Cellular Component: integral component of membrane (GO:0016021);; Biological Process: detection of chemical stimulus involved in senso…	K04257|0|cfa:485330|OR52B2, cOR52B2; cOR52B2 olfactory receptor family 52 subfamily B-like; K04257 olfactory receptor (A)	--	--	Olfactory receptor 1E1 GN=OR1E1 OS=Pan troglodytes (Chimpanzee) PE=3 SV=1	Olfactory receptor {ECO:0000256|RuleBase:RU000688} OS=Canis familiaris (Dog) PE=3 SV=2	PREDICTED: olfactory receptor 52B2 [Canis lupus familiaris]
gene26817	--	--	Molecular Function: G-protein coupled receptor activity (GO:0004930);; Molecular Function: olfactory receptor activity (GO:0004984);; Cellular Component: plasma membrane (GO:0005886);; Biological Process: G-protein coupled receptor signaling pathway (GO:0007186);; Cellular Component: integral component of membrane (GO:0016021);; Biological Process: detection of chemical stimulus involved in senso…	K04257|0|ssc:100523426|olfactory receptor 2L13-like; K04257 olfactory receptor (A)	--	--	Olfactory receptor-like protein OLF3 OS=Canis familiaris (Dog) PE=3 SV=1	Olfactory receptor {ECO:0000256|RuleBase:RU000688} OS=Canis familiaris (Dog) PE=3 SV=2	PREDICTED: olfactory receptor 2L13-like [Bubalus bubalis]
gene26458	--	--	Molecular Function: G-protein coupled receptor activity (GO:0004930);; Molecular Function: olfactory receptor activity (GO:0004984);; Cellular Component: plasma membrane (GO:0005886);; Biological Process: G-protein coupled receptor signaling pathway (GO:0007186);; Cellular Component: integral component of membrane (GO:0016021);; Biological Process: detection of chemical stimulus involved in senso…	K04257|2.60694e-147|myb:102260234|olfactory receptor 7A5-like; K04257 olfactory receptor (A)	--	--	Olfactory receptor-like protein OLF4 OS=Canis familiaris (Dog) PE=3 SV=1	Olfactory receptor {ECO:0000256|RuleBase:RU000688} OS=Myotis lucifugus (Little brown bat) PE=3 SV=1	PREDICTED: olfactory receptor 7A5-like [Myotis lucifugus]
gene19675	--	--	--	K04257|1.91089e-113|cfr:102513226|olfactory receptor 14C36-like; K04257 olfactory receptor (A)	--	--	Olfactory receptor-like protein OLF1 OS=Canis familiaris (Dog) PE=3 SV=1	Olfactory receptor 14C36-like protein {ECO:0000313|EMBL:EPY85959.1} OS=Camelus ferus (Wild Bactrian camel) PE=4 SV=1	PREDICTED: olfactory receptor 14C36-like [Erinaceus europaeus]
gene11460	--	--	Molecular Function: G-protein coupled receptor activity (GO:0004930);; Molecular Function: olfactory receptor activity (GO:0004984);; Cellular Component: plasma membrane (GO:0005886);; Biological Process: G-protein coupled receptor signaling pathway (GO:0007186);; Cellular Component: integral component of membrane (GO:0016021);; Biological Process: detection of chemical stimulus involved in senso…	K04257|3.7836e-149|ecb:100056271|olfactory receptor 10X1-like; K04257 olfactory receptor (A)	--	--	Olfactory receptor-like protein OLF3 OS=Canis familiaris (Dog) PE=3 SV=1	Olfactory receptor {ECO:0000256|RuleBase:RU000688} (Fragment) OS=Equus caballus (Horse) PE=3 SV=1	PREDICTED: olfactory receptor 10X1-like [Equus caballus]
gene17749	--	--	Molecular Function: G-protein coupled receptor activity (GO:0004930);; Molecular Function: olfactory receptor activity (GO:0004984);; Cellular Component: plasma membrane (GO:0005886);; Biological Process: G-protein coupled receptor signaling pathway (GO:0007186);; Cellular Component: integral component of membrane (GO:0016021);; Biological Process: detection of chemical stimulus involved in senso…	K04257|3.66779e-168|ssc:100620594|olfactory receptor 2M4-like; K04257 olfactory receptor (A)	--	--	Olfactory receptor-like protein OLF3 OS=Canis familiaris (Dog) PE=3 SV=1	Olfactory receptor {ECO:0000256|RuleBase:RU000688} OS=Sus scrofa (Pig) PE=3 SV=1	PREDICTED: olfactory receptor 2M4-like [Sus scrofa]
gene10722	--	--	Molecular Function: G-protein coupled receptor activity (GO:0004930);; Molecular Function: olfactory receptor activity (GO:0004984);; Cellular Component: plasma membrane (GO:0005886);; Cellular Component: integral component of membrane (GO:0016021);;	K04257|0|myb:102247972|olfactory receptor 6C2-like; K04257 olfactory receptor (A)	--	--	Olfactory receptor-like protein OLF3 OS=Canis familiaris (Dog) PE=3 SV=1	Uncharacterized protein {ECO:0000313|Ensembl:ENSSSCP00000013611} OS=Sus scrofa (Pig) PE=4 SV=1	PREDICTED: olfactory receptor 6C2-like, partial [Myotis brandtii]
gene6196	--	--	Molecular Function: G-protein coupled receptor activity (GO:0004930);; Molecular Function: olfactory receptor activity (GO:0004984);; Cellular Component: plasma membrane (GO:0005886);; Biological Process: G-protein coupled receptor signaling pathway (GO:0007186);; Cellular Component: integral component of membrane (GO:0016021);; Biological Process: detection of chemical stimulus involved in senso…	K04257|0|umr:103656362|olfactory receptor 2M3-like; K04257 olfactory receptor (A)	--	--	Olfactory receptor-like protein OLF3 OS=Canis familiaris (Dog) PE=3 SV=1	Olfactory receptor {ECO:0000256|RuleBase:RU000688} (Fragment) OS=Ailuropoda melanoleuca (Giant panda) PE=3 SV=1	PREDICTED: olfactory receptor 2M3-like [Ursus maritimus]
gene24224	--	--	Molecular Function: G-protein coupled receptor activity (GO:0004930);; Molecular Function: olfactory receptor activity (GO:0004984);; Cellular Component: plasma membrane (GO:0005886);; Biological Process: G-protein coupled receptor signaling pathway (GO:0007186);; Cellular Component: integral component of membrane (GO:0016021);; Biological Process: detection of chemical stimulus involved in senso…	K04257|5.04423e-123|ptg:102966490|olfactory receptor 8B3-like; K04257 olfactory receptor (A)	--	--	Olfactory receptor-like protein DTMT OS=Canis familiaris (Dog) PE=3 SV=1	Olfactory receptor {ECO:0000256|RuleBase:RU000688} OS=Equus caballus (Horse) PE=3 SV=1	PREDICTED: olfactory receptor 8B3-like [Panthera tigris altaica]
gene24621	--	--	Molecular Function: G-protein coupled receptor activity (GO:0004930);; Molecular Function: olfactory receptor activity (GO:0004984);; Cellular Component: plasma membrane (GO:0005886);; Biological Process: G-protein coupled receptor signaling pathway (GO:0007186);; Cellular Component: integral component of membrane (GO:0016021);; Biological Process: detection of chemical stimulus involved in senso…	K04257|6.12908e-145|fca:101101260|olfactory receptor 13D1-like; K04257 olfactory receptor (A)	--	--	Olfactory receptor-like protein OLF3 OS=Canis familiaris (Dog) PE=3 SV=1	Olfactory receptor {ECO:0000256|RuleBase:RU000688} OS=Felis catus (Cat) PE=3 SV=1	PREDICTED: olfactory receptor 13D1 [Felis catus]
gene15523	--	--	--	K04257|2.79698e-133|umr:103656611|olfactory receptor 4K15-like; K04257 olfactory receptor (A)	--	--	Olfactory receptor-like protein OLF4 OS=Canis familiaris (Dog) PE=3 SV=1	Olfactory receptor {ECO:0000256|RuleBase:RU000688} OS=Mustela putorius furo (European domestic ferret) PE=3 SV=1	PREDICTED: olfactory receptor 4K15-like [Ursus maritimus]
gene6891	--	--	Molecular Function: G-protein coupled receptor activity (GO:0004930);; Molecular Function: olfactory receptor activity (GO:0004984);; Biological Process: G-protein coupled receptor signaling pathway (GO:0007186);; Cellular Component: integral component of membrane (GO:0016021);; Biological Process: detection of chemical stimulus involved in sensory perception of smell (GO:0050911);;	K04257|7.57337e-152|ecb:100069235|olfactory receptor 1F1-like; K04257 olfactory receptor (A)	--	--	Olfactory receptor 1E5 GN=OR1E5 OS=Pan troglodytes (Chimpanzee) PE=3 SV=1	Olfactory receptor {ECO:0000256|RuleBase:RU000688} OS=Equus caballus (Horse) PE=3 SV=1	PREDICTED: olfactory receptor 1F1-like [Mustela putorius furo]
gene23515	--	--	Molecular Function: G-protein coupled receptor activity (GO:0004930);; Molecular Function: olfactory receptor activity (GO:0004984);; Cellular Component: plasma membrane (GO:0005886);; Biological Process: G-protein coupled receptor signaling pathway (GO:0007186);; Cellular Component: integral component of membrane (GO:0016021);; Biological Process: detection of chemical stimulus involved in senso…	K04257|6.31745e-165|umr:103681219|olfactory receptor 51L1-like; K04257 olfactory receptor (A)	--	--	Olfactory receptor 3A1 GN=OR3A1 OS=Gorilla gorilla gorilla (Lowland gorilla) PE=3 SV=1	Olfactory receptor {ECO:0000256|RuleBase:RU000688} OS=Myotis brandtii (Brandt's bat) PE=3 SV=1	PREDICTED: olfactory receptor 51L1-like [Ursus maritimus]
gene13813	--	--	--	K04257|0|fca:101093141|olfactory receptor 4P4-like; K04257 olfactory receptor (A)	--	--	Olfactory receptor 1G1 GN=OR1G1 OS=Gorilla gorilla gorilla (Lowland gorilla) PE=3 SV=1	Uncharacterized protein {ECO:0000313|Ensembl:ENSMPUP00000014462} (Fragment) OS=Mustela putorius furo (European domestic ferret) PE=4 SV=1	PREDICTED: olfactory receptor 4P4-like [Felis catus]
gene22950	--	--	Molecular Function: G-protein coupled receptor activity (GO:0004930);; Molecular Function: olfactory receptor activity (GO:0004984);; Cellular Component: plasma membrane (GO:0005886);; Biological Process: G-protein coupled receptor signaling pathway (GO:0007186);; Cellular Component: integral component of membrane (GO:0016021);; Biological Process: detection of chemical stimulus involved in senso…	--	--	--	Olfactory receptor 1E1 GN=OR1E1 OS=Pan troglodytes (Chimpanzee) PE=3 SV=1	Olfactory receptor {ECO:0000256|RuleBase:RU000688} OS=Equus caballus (Horse) PE=3 SV=1	PREDICTED: olfactory receptor 52B4-like [Equus caballus]
gene2200	--	--	Molecular Function: G-protein coupled receptor activity (GO:0004930);; Molecular Function: olfactory receptor activity (GO:0004984);; Cellular Component: plasma membrane (GO:0005886);; Biological Process: G-protein coupled receptor signaling pathway (GO:0007186);; Cellular Component: integral component of membrane (GO:0016021);; Biological Process: detection of chemical stimulus involved in senso…	K04257|0|ptg:102958274|olfactory receptor 8K5-like; K04257 olfactory receptor (A)	--	--	Olfactory receptor-like protein OLF2 OS=Canis familiaris (Dog) PE=3 SV=1	Olfactory receptor {ECO:0000256|RuleBase:RU000688} OS=Ailuropoda melanoleuca (Giant panda) PE=3 SV=1	PREDICTED: olfactory receptor 8K5-like [Panthera tigris altaica]
gene13053	--	--	Molecular Function: G-protein coupled receptor activity (GO:0004930);; Molecular Function: olfactory receptor activity (GO:0004984);; Cellular Component: plasma membrane (GO:0005886);; Biological Process: G-protein coupled receptor signaling pathway (GO:0007186);; Cellular Component: integral component of membrane (GO:0016021);; Biological Process: detection of chemical stimulus involved in senso…	K04257|2.22563e-165|cfr:102521682|olfactory receptor 5B3-like; K04257 olfactory receptor (A)	--	--	Olfactory receptor-like protein OLF2 OS=Canis familiaris (Dog) PE=3 SV=1	Olfactory receptor {ECO:0000256|RuleBase:RU000688} OS=Equus caballus (Horse) PE=3 SV=1	PREDICTED: olfactory receptor 5B3-like [Vicugna pacos]
gene4205	--	--	Molecular Function: G-protein coupled receptor activity (GO:0004930);; Molecular Function: olfactory receptor activity (GO:0004984);; Cellular Component: plasma membrane (GO:0005886);; Biological Process: G-protein coupled receptor signaling pathway (GO:0007186);; Cellular Component: integral component of membrane (GO:0016021);; Biological Process: detection of chemical stimulus involved in senso…	K04257|0|cfa:610109|olfactory receptor 51L1-like; K04257 olfactory receptor (A)	--	--	Olfactory receptor 1E5 GN=OR1E5 OS=Pan troglodytes (Chimpanzee) PE=3 SV=1	Olfactory receptor {ECO:0000256|RuleBase:RU000688} OS=Equus caballus (Horse) PE=3 SV=1	PREDICTED: olfactory receptor 51L1-like [Ceratotherium simum simum]
gene21626	--	--	--	K04257|3.45622e-176|fca:101101164|olfactory receptor 4S2-like; K04257 olfactory receptor (A)	--	--	Olfactory receptor-like protein OLF1 OS=Canis familiaris (Dog) PE=3 SV=1	Olfactory receptor {ECO:0000256|RuleBase:RU000688} OS=Felis catus (Cat) PE=3 SV=1	PREDICTED: olfactory receptor 4S2 [Felis catus]
gene15557	--	--	Molecular Function: G-protein coupled receptor activity (GO:0004930);; Molecular Function: olfactory receptor activity (GO:0004984);; Cellular Component: plasma membrane (GO:0005886);; Biological Process: G-protein coupled receptor signaling pathway (GO:0007186);; Cellular Component: integral component of membrane (GO:0016021);; Biological Process: detection of chemical stimulus involved in senso…	K04257|3.05053e-168|fca:101090380|olfactory receptor 5K4-like; K04257 olfactory receptor (A)	--	--	Olfactory receptor-like protein OLF1 OS=Canis familiaris (Dog) PE=3 SV=1	Olfactory receptor {ECO:0000256|RuleBase:RU000688} OS=Equus caballus (Horse) PE=3 SV=1	PREDICTED: olfactory receptor 5K1-like [Ceratotherium simum simum]
gene14823	--	--	Molecular Function: G-protein coupled receptor activity (GO:0004930);; Molecular Function: olfactory receptor activity (GO:0004984);; Cellular Component: plasma membrane (GO:0005886);; Cellular Component: integral component of membrane (GO:0016021);;	K04257|2.77959e-119|chx:102185657|olfactory receptor 4Q2-like; K04257 olfactory receptor (A)	--	--	Olfactory receptor 1G1 GN=OR1G1 OS=Gorilla gorilla gorilla (Lowland gorilla) PE=3 SV=1	Olfactory receptor {ECO:0000256|RuleBase:RU000688} (Fragment) OS=Felis catus (Cat) PE=3 SV=1	PREDICTED: olfactory receptor 4Q2 [Bison bison bison]
gene19665	--	--	Molecular Function: G-protein coupled receptor activity (GO:0004930);; Molecular Function: olfactory receptor activity (GO:0004984);; Cellular Component: plasma membrane (GO:0005886);; Biological Process: G-protein coupled receptor signaling pathway (GO:0007186);; Cellular Component: integral component of membrane (GO:0016021);; Biological Process: detection of chemical stimulus involved in senso…	K04257|0|pale:102880296|putative olfactory receptor 51H1-like; K04257 olfactory receptor (A)	--	--	Olfactory receptor 1E1 GN=OR1E1 OS=Pan troglodytes (Chimpanzee) PE=3 SV=1	Putative olfactory receptor 51H1 {ECO:0000313|EMBL:ELK19662.1} OS=Pteropus alecto (Black flying fox) PE=4 SV=1	PREDICTED: putative olfactory receptor 51H1-like [Pteropus alecto]
gene13615	--	--	--	K04257|1.47857e-171|ptg:102953044|olfactory receptor 4Q3-like; K04257 olfactory receptor (A)	--	--	Olfactory receptor-like protein OLF1 OS=Canis familiaris (Dog) PE=3 SV=1	Olfactory receptor {ECO:0000256|RuleBase:RU000688} (Fragment) OS=Felis catus (Cat) PE=3 SV=1	PREDICTED: olfactory receptor 4Q3, partial [Eptesicus fuscus]
gene3877	--	--	Molecular Function: G-protein coupled receptor activity (GO:0004930);; Molecular Function: olfactory receptor activity (GO:0004984);; Cellular Component: plasma membrane (GO:0005886);; Biological Process: G-protein coupled receptor signaling pathway (GO:0007186);; Cellular Component: integral component of membrane (GO:0016021);; Biological Process: detection of chemical stimulus involved in senso…	K04257|8.19084e-160|ecb:100058198|olfactory receptor 8S1-like; K04257 olfactory receptor (A)	--	--	Olfactory receptor-like protein DTMT OS=Canis familiaris (Dog) PE=3 SV=1	Olfactory receptor {ECO:0000256|RuleBase:RU000688} OS=Equus caballus (Horse) PE=3 SV=1	PREDICTED: olfactory receptor 8S1-like [Equus caballus]
gene10933	--	--	Molecular Function: G-protein coupled receptor activity (GO:0004930);; Molecular Function: olfactory receptor activity (GO:0004984);; Cellular Component: plasma membrane (GO:0005886);; Cellular Component: integral component of membrane (GO:0016021);;	K04257|4.27046e-162|umr:103680620|olfactory receptor 5V1-like; K04257 olfactory receptor (A)	--	--	Olfactory receptor 3A2 GN=OR3A2 OS=Pan troglodytes (Chimpanzee) PE=3 SV=1	Olfactory receptor {ECO:0000256|RuleBase:RU000688} (Fragment) OS=Bos mutus PE=3 SV=1	PREDICTED: olfactory receptor 5V1-like [Ursus maritimus]
gene10717	--	--	Molecular Function: G-protein coupled receptor activity (GO:0004930);; Molecular Function: olfactory receptor activity (GO:0004984);; Cellular Component: plasma membrane (GO:0005886);; Biological Process: G-protein coupled receptor signaling pathway (GO:0007186);; Cellular Component: integral component of membrane (GO:0016021);; Biological Process: detection of chemical stimulus involved in senso…	K04257|0|ecb:100057428|olfactory receptor 12D2-like; K04257 olfactory receptor (A)	--	--	Olfactory receptor-like protein OLF3 OS=Canis familiaris (Dog) PE=3 SV=1	Olfactory receptor {ECO:0000256|RuleBase:RU000688} OS=Equus caballus (Horse) PE=3 SV=1	PREDICTED: olfactory receptor 12D2-like [Ceratotherium simum simum]
gene23464	--	--	Molecular Function: G-protein coupled receptor activity (GO:0004930);; Molecular Function: olfactory receptor activity (GO:0004984);; Cellular Component: plasma membrane (GO:0005886);; Biological Process: G-protein coupled receptor signaling pathway (GO:0007186);; Cellular Component: integral component of membrane (GO:0016021);; Biological Process: detection of chemical stimulus involved in senso…	K04257|4.79586e-100|ssc:100520482|olfactory receptor-like protein OLF2-like; K04257 olfactory receptor (A)	--	--	Olfactory receptor-like protein OLF1 OS=Canis familiaris (Dog) PE=3 SV=1	Olfactory receptor {ECO:0000256|RuleBase:RU000688} (Fragment) OS=Sus scrofa (Pig) PE=3 SV=1	PREDICTED: olfactory receptor-like protein OLF2-like [Sus scrofa]
gene25929	--	--	--	K04257|3.40162e-130|bacu:103014646|olfactory receptor 1J2-like; K04257 olfactory receptor (A)	--	--	Olfactory receptor 1E5 GN=OR1E5 OS=Pan troglodytes (Chimpanzee) PE=3 SV=1	Olfactory receptor {ECO:0000256|RuleBase:RU000688} OS=Camelus ferus (Wild Bactrian camel) PE=3 SV=1	PREDICTED: olfactory receptor 1J4-like [Equus przewalskii]
gene11165	--	--	Molecular Function: transmembrane signaling receptor activity (GO:0004888);; Biological Process: signal transduction (GO:0007165);; Biological Process: sensory perception of smell (GO:0007608);; Cellular Component: membrane (GO:0016020);;	K04257|1.9516e-140|ngi:103750360|olfactory receptor 5V1-like; K04257 olfactory receptor (A)	--	--	Olfactory receptor 3A2 GN=OR3A2 OS=Pan troglodytes (Chimpanzee) PE=3 SV=1	Olfactory receptor {ECO:0000256|RuleBase:RU000688} (Fragment) OS=Oryctolagus cuniculus (Rabbit) PE=3 SV=1	PREDICTED: olfactory receptor 5V1-like [Panthera tigris altaica]
gene12441	--	--	Molecular Function: G-protein coupled receptor activity (GO:0004930);; Molecular Function: olfactory receptor activity (GO:0004984);; Cellular Component: plasma membrane (GO:0005886);; Biological Process: G-protein coupled receptor signaling pathway (GO:0007186);; Cellular Component: integral component of membrane (GO:0016021);; Biological Process: detection of chemical stimulus involved in senso…	--	--	--	Olfactory receptor 1E2 GN=OR1E2 OS=Pan troglodytes (Chimpanzee) PE=3 SV=1	Olfactory receptor {ECO:0000256|RuleBase:RU000688} OS=Felis catus (Cat) PE=3 SV=1	PREDICTED: olfactory receptor 4F21-like [Odobenus rosmarus divergens]
gene21566	--	--	Molecular Function: G-protein coupled receptor activity (GO:0004930);; Molecular Function: olfactory receptor activity (GO:0004984);; Cellular Component: plasma membrane (GO:0005886);; Biological Process: G-protein coupled receptor signaling pathway (GO:0007186);; Cellular Component: integral component of membrane (GO:0016021);; Biological Process: detection of chemical stimulus involved in senso…	K04257|3.75917e-147|cfa:483506|OR9G4, cOR9G4; cOR9G4 olfactory receptor family 9 subfamily G-like; K04257 olfactory receptor (A)	--	--	Olfactory receptor-like protein OLF1 OS=Canis familiaris (Dog) PE=3 SV=1	Olfactory receptor {ECO:0000256|RuleBase:RU000688} (Fragment) OS=Canis familiaris (Dog) PE=3 SV=1	PREDICTED: olfactory receptor 9G4 [Canis lupus familiaris]
gene9039	--	--	Molecular Function: G-protein coupled receptor activity (GO:0004930);; Molecular Function: olfactory receptor activity (GO:0004984);; Biological Process: G-protein coupled receptor signaling pathway (GO:0007186);; Cellular Component: integral component of membrane (GO:0016021);; Biological Process: detection of chemical stimulus involved in sensory perception of smell (GO:0050911);;	K04257|0|ecb:100146186|olfactory receptor 51F2-like; K04257 olfactory receptor (A)	--	--	Olfactory receptor 3A3 GN=OR3A3 OS=Pan troglodytes (Chimpanzee) PE=3 SV=1	Olfactory receptor {ECO:0000256|RuleBase:RU000688} OS=Equus caballus (Horse) PE=3 SV=1	PREDICTED: olfactory receptor 51F2-like [Equus caballus]
gene26916	--	--	Molecular Function: G-protein coupled receptor activity (GO:0004930);; Molecular Function: olfactory receptor activity (GO:0004984);; Cellular Component: plasma membrane (GO:0005886);; Biological Process: G-protein coupled receptor signaling pathway (GO:0007186);; Cellular Component: integral component of membrane (GO:0016021);; Biological Process: detection of chemical stimulus involved in senso…	K04257|0|aml:100478863|olfactory receptor 6M1-like; K04257 olfactory receptor (A)	--	--	Olfactory receptor 1G1 GN=OR1G1 OS=Gorilla gorilla gorilla (Lowland gorilla) PE=3 SV=1	Olfactory receptor {ECO:0000256|RuleBase:RU000688} (Fragment) OS=Ailuropoda melanoleuca (Giant panda) PE=3 SV=1	hypothetical protein PANDA_016659 [Ailuropoda melanoleuca]
gene18540	--	--	Molecular Function: G-protein coupled receptor activity (GO:0004930);; Molecular Function: olfactory receptor activity (GO:0004984);; Cellular Component: plasma membrane (GO:0005886);; Biological Process: G-protein coupled receptor signaling pathway (GO:0007186);; Cellular Component: integral component of membrane (GO:0016021);; Biological Process: detection of chemical stimulus involved in senso…	K04257|4.32504e-171|oas:101107296|olfactory receptor 1A1-like; K04257 olfactory receptor (A)	--	--	Olfactory receptor 1A1 GN=OR1A1 OS=Pan troglodytes (Chimpanzee) PE=3 SV=1	Uncharacterized protein {ECO:0000313|Ensembl:ENSOARP00000004385} OS=Ovis aries (Sheep) PE=4 SV=1	PREDICTED: olfactory receptor 1A1-like [Ovis aries]
gene9398	--	--	Molecular Function: G-protein coupled receptor activity (GO:0004930);; Molecular Function: olfactory receptor activity (GO:0004984);; Cellular Component: plasma membrane (GO:0005886);; Biological Process: G-protein coupled receptor signaling pathway (GO:0007186);; Cellular Component: integral component of membrane (GO:0016021);; Biological Process: detection of chemical stimulus involved in senso…	K04257|0|umr:103656332|olfactory receptor 2T11; K04257 olfactory receptor (A)	--	--	Olfactory receptor-like protein OLF3 OS=Canis familiaris (Dog) PE=3 SV=1	Olfactory receptor {ECO:0000256|RuleBase:RU000688} OS=Canis familiaris (Dog) PE=3 SV=2	PREDICTED: olfactory receptor 2T11 [Ursus maritimus]
gene22295	--	--	Molecular Function: G-protein coupled receptor activity (GO:0004930);; Molecular Function: olfactory receptor activity (GO:0004984);; Cellular Component: plasma membrane (GO:0005886);; Cellular Component: integral component of membrane (GO:0016021);;	K04257|0|ssc:100517700|olfactory receptor 7D4-like; K04257 olfactory receptor (A)	--	--	Olfactory receptor-like protein OLF4 OS=Canis familiaris (Dog) PE=3 SV=1	Uncharacterized protein {ECO:0000313|Ensembl:ENSSSCP00000014535} OS=Sus scrofa (Pig) PE=4 SV=1	PREDICTED: olfactory receptor 7D4-like [Ceratotherium simum simum]
gene2202	--	--	Molecular Function: G-protein coupled receptor activity (GO:0004930);; Molecular Function: olfactory receptor activity (GO:0004984);; Cellular Component: plasma membrane (GO:0005886);; Biological Process: G-protein coupled receptor signaling pathway (GO:0007186);; Cellular Component: integral component of membrane (GO:0016021);; Biological Process: detection of chemical stimulus involved in senso…	K04257|6.04324e-171|umr:103666076|olfactory receptor 8K1; K04257 olfactory receptor (A)	--	--	Olfactory receptor-like protein OLF2 OS=Canis familiaris (Dog) PE=3 SV=1	Olfactory receptor {ECO:0000256|RuleBase:RU000688} OS=Myotis brandtii (Brandt's bat) PE=3 SV=1	PREDICTED: olfactory receptor 8K1 [Ursus maritimus]
gene7199	--	--	Molecular Function: G-protein coupled receptor activity (GO:0004930);; Molecular Function: olfactory receptor activity (GO:0004984);; Cellular Component: plasma membrane (GO:0005886);; Biological Process: G-protein coupled receptor signaling pathway (GO:0007186);; Cellular Component: integral component of membrane (GO:0016021);; Biological Process: detection of chemical stimulus involved in senso…	K04257|3.88225e-179|cfa:486571|cOR8S15; cOR8S15 olfactory receptor family 8 subfamily S-like; K04257 olfactory receptor (A)	--	--	Olfactory receptor-like protein DTMT OS=Canis familiaris (Dog) PE=3 SV=1	Olfactory receptor {ECO:0000256|RuleBase:RU000688} OS=Felis catus (Cat) PE=3 SV=1	PREDICTED: olfactory receptor 8S1-like [Orycteropus afer afer]
gene11847	--	--	Molecular Function: G-protein coupled receptor activity (GO:0004930);; Molecular Function: olfactory receptor activity (GO:0004984);; Cellular Component: plasma membrane (GO:0005886);; Biological Process: G-protein coupled receptor signaling pathway (GO:0007186);; Cellular Component: integral component of membrane (GO:0016021);; Biological Process: detection of chemical stimulus involved in senso…	K04257|1.32144e-168|ecb:100072227|olfactory receptor 4K3-like; K04257 olfactory receptor (A)	--	--	Olfactory receptor-like protein OLF3 OS=Canis familiaris (Dog) PE=3 SV=1	Olfactory receptor {ECO:0000256|RuleBase:RU000688} OS=Mustela putorius furo (European domestic ferret) PE=3 SV=1	PREDICTED: olfactory receptor 4K3-like [Mustela putorius furo]
gene13714	--	--	--	K04257|0|myb:102242748|olfactory receptor 52N4-like; K04257 olfactory receptor (A)	--	--	Olfactory receptor 1G1 GN=OR1G1 OS=Gorilla gorilla gorilla (Lowland gorilla) PE=3 SV=1	Olfactory receptor {ECO:0000256|RuleBase:RU000688} OS=Myotis lucifugus (Little brown bat) PE=3 SV=1	PREDICTED: olfactory receptor 52N4-like [Sorex araneus]
gene25737	--	--	--	K04257|2.96723e-160|bta:507971|olfactory receptor 2T3; K04257 olfactory receptor (A)	--	--	Olfactory receptor 1D2 GN=OR1D2 OS=Pongo pygmaeus (Bornean orangutan) PE=3 SV=1	Olfactory receptor {ECO:0000256|RuleBase:RU000688} OS=Bos taurus (Bovine) PE=3 SV=1	PREDICTED: olfactory receptor 2T3 [Bos taurus]
gene9411	--	--	Molecular Function: transmembrane signaling receptor activity (GO:0004888);; Biological Process: signal transduction (GO:0007165);; Biological Process: sensory perception of smell (GO:0007608);; Cellular Component: membrane (GO:0016020);;	K04257|7.16302e-63|ecb:100065637|olfactory receptor 14C36-like; K04257 olfactory receptor (A)	--	--	Olfactory receptor-like protein OLF1 OS=Canis familiaris (Dog) PE=3 SV=1	Olfactory receptor 14C36-like protein {ECO:0000313|EMBL:EPY85959.1} OS=Camelus ferus (Wild Bactrian camel) PE=4 SV=1	PREDICTED: olfactory receptor 14C36-like [Erinaceus europaeus]
gene9420	--	--	Molecular Function: G-protein coupled receptor activity (GO:0004930);; Molecular Function: olfactory receptor activity (GO:0004984);; Cellular Component: plasma membrane (GO:0005886);; Biological Process: G-protein coupled receptor signaling pathway (GO:0007186);; Cellular Component: integral component of membrane (GO:0016021);; Biological Process: detection of chemical stimulus involved in senso…	K04257|5.99887e-141|ngi:103748243|olfactory receptor 6C74-like; K04257 olfactory receptor (A)	--	--	Olfactory receptor 1E5 GN=OR1E5 OS=Pan troglodytes (Chimpanzee) PE=3 SV=1	Olfactory receptor {ECO:0000256|RuleBase:RU000688} OS=Otolemur garnettii (Small-eared galago) PE=3 SV=1	PREDICTED: olfactory receptor 6C74-like [Mustela putorius furo]
gene17971	--	--	Molecular Function: G-protein coupled receptor activity (GO:0004930);; Molecular Function: olfactory receptor activity (GO:0004984);; Cellular Component: plasma membrane (GO:0005886);; Biological Process: G-protein coupled receptor signaling pathway (GO:0007186);; Cellular Component: integral component of membrane (GO:0016021);; Biological Process: detection of chemical stimulus involved in senso…	K04257|1.1036e-110|ecb:100066693|olfactory receptor 5AN1-like; K04257 olfactory receptor (A)	--	--	Olfactory receptor-like protein OLF1 OS=Canis familiaris (Dog) PE=3 SV=1	Olfactory receptor {ECO:0000256|RuleBase:RU000688} OS=Equus caballus (Horse) PE=3 SV=1	PREDICTED: olfactory receptor 5AN1-like [Vicugna pacos]
gene5675	--	--	Molecular Function: G-protein coupled receptor activity (GO:0004930);; Molecular Function: olfactory receptor activity (GO:0004984);; Cellular Component: plasma membrane (GO:0005886);; Biological Process: G-protein coupled receptor signaling pathway (GO:0007186);; Cellular Component: integral component of membrane (GO:0016021);; Biological Process: detection of chemical stimulus involved in senso…	K04257|6.96708e-163|umr:103672252|olfactory receptor 4C16-like; K04257 olfactory receptor (A)	--	--	Olfactory receptor 1G1 GN=OR1G1 OS=Gorilla gorilla gorilla (Lowland gorilla) PE=3 SV=1	Olfactory receptor {ECO:0000256|RuleBase:RU000688} (Fragment) OS=Ailuropoda melanoleuca (Giant panda) PE=3 SV=1	PREDICTED: olfactory receptor 4C16-like [Ursus maritimus]
gene18076	--	--	Molecular Function: G-protein coupled receptor activity (GO:0004930);; Molecular Function: olfactory receptor activity (GO:0004984);; Cellular Component: plasma membrane (GO:0005886);; Biological Process: G-protein coupled receptor signaling pathway (GO:0007186);; Cellular Component: integral component of membrane (GO:0016021);; Biological Process: detection of chemical stimulus involved in senso…	K04257|0|pale:102884401|olfactory receptor 6C2-like; K04257 olfactory receptor (A)	--	--	Olfactory receptor 1E1 GN=OR1E1 OS=Pan troglodytes (Chimpanzee) PE=3 SV=1	Olfactory receptor {ECO:0000256|RuleBase:RU000688} (Fragment) OS=Myotis lucifugus (Little brown bat) PE=3 SV=1	PREDICTED: olfactory receptor 6C2-like [Pteropus alecto]
gene6912	--	--	Molecular Function: G-protein coupled receptor activity (GO:0004930);; Molecular Function: olfactory receptor activity (GO:0004984);; Cellular Component: plasma membrane (GO:0005886);; Biological Process: G-protein coupled receptor signaling pathway (GO:0007186);; Cellular Component: integral component of membrane (GO:0016021);; Biological Process: detection of chemical stimulus involved in senso…	K04257|2.13656e-170|ptg:102967987|olfactory receptor 10A4-like; K04257 olfactory receptor (A)	--	--	Olfactory receptor 1G1 GN=OR1G1 OS=Gorilla gorilla gorilla (Lowland gorilla) PE=3 SV=1	Olfactory receptor {ECO:0000256|RuleBase:RU000688} OS=Felis catus (Cat) PE=3 SV=1	PREDICTED: olfactory receptor 11L1-like [Sorex araneus]
gene644	--	--	Molecular Function: G-protein coupled receptor activity (GO:0004930);; Molecular Function: olfactory receptor activity (GO:0004984);; Cellular Component: plasma membrane (GO:0005886);; Cellular Component: integral component of membrane (GO:0016021);;	K04257|0|ptg:102962253|olfactory receptor 4F3/4F16/4F29-like; K04257 olfactory receptor (A)	--	--	Olfactory receptor-like protein OLF3 OS=Canis familiaris (Dog) PE=3 SV=1	Olfactory receptor {ECO:0000256|RuleBase:RU000688} OS=Equus caballus (Horse) PE=3 SV=1	PREDICTED: olfactory receptor 4F3/4F16/4F29-like [Ceratotherium simum simum]
gene20074	--	--	Molecular Function: G-protein coupled receptor activity (GO:0004930);; Molecular Function: olfactory receptor activity (GO:0004984);; Cellular Component: plasma membrane (GO:0005886);; Biological Process: G-protein coupled receptor signaling pathway (GO:0007186);; Cellular Component: integral component of membrane (GO:0016021);; Biological Process: detection of chemical stimulus involved in senso…	K04257|0|ecb:100071983|olfactory receptor 8G2-like; K04257 olfactory receptor (A)	--	--	Olfactory receptor-like protein OLF2 OS=Canis familiaris (Dog) PE=3 SV=1	Olfactory receptor {ECO:0000256|RuleBase:RU000688} OS=Equus caballus (Horse) PE=3 SV=1	PREDICTED: olfactory receptor 8G2-like [Equus caballus]
gene14708	--	--	Molecular Function: G-protein coupled receptor activity (GO:0004930);; Molecular Function: olfactory receptor activity (GO:0004984);; Cellular Component: plasma membrane (GO:0005886);; Biological Process: G-protein coupled receptor signaling pathway (GO:0007186);; Cellular Component: integral component of membrane (GO:0016021);; Biological Process: detection of chemical stimulus involved in senso…	K04257|2.79046e-156|ptg:102966341|olfactory receptor 7D4-like; K04257 olfactory receptor (A)	--	--	Olfactory receptor-like protein OLF4 OS=Canis familiaris (Dog) PE=3 SV=1	Olfactory receptor {ECO:0000256|RuleBase:RU000688} OS=Bos taurus (Bovine) PE=3 SV=2	PREDICTED: olfactory receptor 7D4-like [Camelus bactrianus]
gene22938	--	--	Molecular Function: G-protein coupled receptor activity (GO:0004930);; Molecular Function: olfactory receptor activity (GO:0004984);; Cellular Component: plasma membrane (GO:0005886);; Biological Process: G-protein coupled receptor signaling pathway (GO:0007186);; Cellular Component: integral component of membrane (GO:0016021);; Biological Process: detection of chemical stimulus involved in senso…	K04257|0|fca:101081493|olfactory receptor 52B6-like; K04257 olfactory receptor (A)	--	--	Olfactory receptor 3A2 GN=OR3A2 OS=Pan troglodytes (Chimpanzee) PE=3 SV=1	Olfactory receptor {ECO:0000256|RuleBase:RU000688} OS=Rhinolophus ferrumequinum (Greater horseshoe bat) PE=3 SV=1	olfactory receptor, family 52, subfamily B, member 6 (predicted) [Rhinolophus ferrumequinum]
gene5604	--	--	--	K04257|2.31927e-123|mcf:102136769|olfactory receptor 14I1-like; K04257 olfactory receptor (A)	--	--	Olfactory receptor 1E1 GN=OR1E1 OS=Pan troglodytes (Chimpanzee) PE=3 SV=1	Olfactory receptor {ECO:0000256|RuleBase:RU000688} OS=Sarcophilus harrisii (Tasmanian devil) PE=3 SV=1	PREDICTED: olfactory receptor 14I1-like [Dasypus novemcinctus]
gene20469	--	--	--	K04257|0|myb:102249122|olfactory receptor 5AK2-like; K04257 olfactory receptor (A)	--	--	Olfactory receptor-like protein OLF1 OS=Canis familiaris (Dog) PE=3 SV=1	Olfactory receptor {ECO:0000256|RuleBase:RU000688} OS=Myotis lucifugus (Little brown bat) PE=3 SV=1	PREDICTED: olfactory receptor 5AK2-like [Myotis brandtii]
gene18953	--	--	Molecular Function: G-protein coupled receptor activity (GO:0004930);; Molecular Function: olfactory receptor activity (GO:0004984);; Cellular Component: plasma membrane (GO:0005886);; Biological Process: G-protein coupled receptor signaling pathway (GO:0007186);; Cellular Component: integral component of membrane (GO:0016021);; Biological Process: detection of chemical stimulus involved in senso…	K04257|3.48603e-180|ocu:100356635|olfactory receptor 2A12-like; K04257 olfactory receptor (A)	--	--	Olfactory receptor-like protein OLF3 OS=Canis familiaris (Dog) PE=3 SV=1	Uncharacterized protein {ECO:0000313|Ensembl:ENSOCUP00000022678} OS=Oryctolagus cuniculus (Rabbit) PE=4 SV=1	PREDICTED: olfactory receptor 2A12-like [Oryctolagus cuniculus]
gene20362	--	--	Molecular Function: G-protein coupled receptor activity (GO:0004930);; Molecular Function: olfactory receptor activity (GO:0004984);; Cellular Component: plasma membrane (GO:0005886);; Biological Process: G-protein coupled receptor signaling pathway (GO:0007186);; Cellular Component: integral component of membrane (GO:0016021);; Biological Process: detection of chemical stimulus involved in senso…	K04257|2.362e-154|tup:102502838|olfactory receptor 4C12-like; K04257 olfactory receptor (A)	--	--	Olfactory receptor-like protein OLF1 OS=Canis familiaris (Dog) PE=3 SV=1	Olfactory receptor {ECO:0000256|RuleBase:RU000688} OS=Pteropus alecto (Black flying fox) PE=3 SV=1	PREDICTED: olfactory receptor 4C12-like [Chrysochloris asiatica]
gene9133	--	--	Molecular Function: G-protein coupled receptor activity (GO:0004930);; Molecular Function: olfactory receptor activity (GO:0004984);; Cellular Component: plasma membrane (GO:0005886);; Biological Process: G-protein coupled receptor signaling pathway (GO:0007186);; Cellular Component: integral component of membrane (GO:0016021);; Biological Process: detection of chemical stimulus involved in senso…	K04257|0|ecb:100072547|olfactory receptor 1D2-like; K04257 olfactory receptor (A)	--	--	Olfactory receptor 1D2 GN=OR1D2 OS=Pan troglodytes (Chimpanzee) PE=3 SV=1	Olfactory receptor {ECO:0000256|RuleBase:RU000688} OS=Equus caballus (Horse) PE=3 SV=1	PREDICTED: olfactory receptor 1D2-like [Ceratotherium simum simum]
gene26885	--	--	Molecular Function: G-protein coupled receptor activity (GO:0004930);; Molecular Function: olfactory receptor activity (GO:0004984);; Cellular Component: plasma membrane (GO:0005886);; Biological Process: G-protein coupled receptor signaling pathway (GO:0007186);; Cellular Component: integral component of membrane (GO:0016021);; Biological Process: detection of chemical stimulus involved in senso…	K04257|2.28232e-90|nle:100589670|olfactory receptor 9Q2-like; K04257 olfactory receptor (A)	--	--	Olfactory receptor-like protein OLF1 OS=Canis familiaris (Dog) PE=3 SV=1	Olfactory receptor {ECO:0000256|RuleBase:RU000688} OS=Callithrix jacchus (White-tufted-ear marmoset) PE=3 SV=1	PREDICTED: olfactory receptor 9Q2-like [Condylura cristata]
gene5526	--	--	Molecular Function: G-protein coupled receptor activity (GO:0004930);; Molecular Function: olfactory receptor activity (GO:0004984);; Cellular Component: plasma membrane (GO:0005886);; Biological Process: G-protein coupled receptor signaling pathway (GO:0007186);; Cellular Component: integral component of membrane (GO:0016021);; Biological Process: detection of chemical stimulus involved in senso…	K04257|0|aml:100468005|olfactory receptor 9G1-like; K04257 olfactory receptor (A)	--	--	Olfactory receptor-like protein OLF1 OS=Canis familiaris (Dog) PE=3 SV=1	Olfactory receptor {ECO:0000256|RuleBase:RU000688} OS=Ailuropoda melanoleuca (Giant panda) PE=3 SV=1	PREDICTED: olfactory receptor 9G1-like [Chrysochloris asiatica]
gene21216	--	--	Molecular Function: G-protein coupled receptor activity (GO:0004930);; Molecular Function: olfactory receptor activity (GO:0004984);; Cellular Component: plasma membrane (GO:0005886);; Biological Process: G-protein coupled receptor signaling pathway (GO:0007186);; Cellular Component: integral component of membrane (GO:0016021);; Biological Process: detection of chemical stimulus involved in senso…	K04257|0|cfa:483540|olfactory receptor 1052-like; K04257 olfactory receptor (A)	--	--	Olfactory receptor-like protein OLF1 OS=Canis familiaris (Dog) PE=3 SV=1	Olfactory receptor {ECO:0000256|RuleBase:RU000688} OS=Pteropus alecto (Black flying fox) PE=3 SV=1	Olfactory receptor 1052 [Pteropus alecto]
gene26015	--	--	--	K04257|6.63201e-104|aml:100473147|olfactory receptor 2T2-like; K04257 olfactory receptor (A)	--	--	Olfactory receptor-like protein OLF2 OS=Canis familiaris (Dog) PE=3 SV=1	Olfactory receptor {ECO:0000256|RuleBase:RU000688} (Fragment) OS=Loxodonta africana (African elephant) PE=3 SV=1	PREDICTED: olfactory receptor 56-like [Erinaceus europaeus]
gene20076	--	--	Molecular Function: G-protein coupled receptor activity (GO:0004930);; Molecular Function: olfactory receptor activity (GO:0004984);; Cellular Component: plasma membrane (GO:0005886);; Biological Process: G-protein coupled receptor signaling pathway (GO:0007186);; Cellular Component: integral component of membrane (GO:0016021);; Biological Process: detection of chemical stimulus involved in senso…	K04257|8.20496e-169|ptg:102966490|olfactory receptor 8B3-like; K04257 olfactory receptor (A)	--	--	Olfactory receptor-like protein OLF2 OS=Canis familiaris (Dog) PE=3 SV=1	Olfactory receptor {ECO:0000256|RuleBase:RU000688} OS=Felis catus (Cat) PE=3 SV=1	PREDICTED: olfactory receptor 8B3-like [Panthera tigris altaica]
gene24192	--	--	Molecular Function: G-protein coupled receptor activity (GO:0004930);; Molecular Function: olfactory receptor activity (GO:0004984);; Cellular Component: plasma membrane (GO:0005886);; Biological Process: G-protein coupled receptor signaling pathway (GO:0007186);; Cellular Component: integral component of membrane (GO:0016021);; Biological Process: detection of chemical stimulus involved in senso…	K04257|3.70306e-139|ptg:102956056|olfactory receptor 4C11-like; K04257 olfactory receptor (A)	--	--	Olfactory receptor-like protein OLF1 OS=Canis familiaris (Dog) PE=3 SV=1	Olfactory receptor {ECO:0000256|RuleBase:RU000688} OS=Otolemur garnettii (Small-eared galago) PE=3 SV=1	PREDICTED: olfactory receptor 4C11-like [Panthera tigris altaica]
gene25454	--	--	Molecular Function: G-protein coupled receptor activity (GO:0004930);; Molecular Function: olfactory receptor activity (GO:0004984);; Cellular Component: plasma membrane (GO:0005886);; Cellular Component: integral component of membrane (GO:0016021);;	K04257|3.82353e-76|oas:101109537|olfactory receptor 18-like; K04257 olfactory receptor (A)	--	--	Olfactory receptor-like protein OLF4 OS=Canis familiaris (Dog) PE=3 SV=1	Olfactory receptor {ECO:0000256|RuleBase:RU000688} (Fragment) OS=Ailuropoda melanoleuca (Giant panda) PE=3 SV=1	PREDICTED: olfactory receptor 18-like [Ceratotherium simum simum]
gene15556	--	--	Molecular Function: G-protein coupled receptor activity (GO:0004930);; Molecular Function: olfactory receptor activity (GO:0004984);; Cellular Component: plasma membrane (GO:0005886);; Biological Process: G-protein coupled receptor signaling pathway (GO:0007186);; Cellular Component: integral component of membrane (GO:0016021);; Biological Process: detection of chemical stimulus involved in senso…	K04257|1.88225e-174|fca:101090380|olfactory receptor 5K4-like; K04257 olfactory receptor (A)	--	--	Olfactory receptor-like protein OLF1 OS=Canis familiaris (Dog) PE=3 SV=1	Olfactory receptor {ECO:0000256|RuleBase:RU000688} (Fragment) OS=Felis catus (Cat) PE=3 SV=1	PREDICTED: LOW QUALITY PROTEIN: olfactory receptor 5K1-like [Equus przewalskii]
gene12608	--	--	Molecular Function: G-protein coupled receptor activity (GO:0004930);; Molecular Function: olfactory receptor activity (GO:0004984);; Cellular Component: plasma membrane (GO:0005886);; Cellular Component: integral component of membrane (GO:0016021);;	K04257|1.29958e-174|fca:101088874|olfactory receptor 52W1-like; K04257 olfactory receptor (A)	--	--	Olfactory receptor-like protein OLF3 OS=Canis familiaris (Dog) PE=3 SV=1	Uncharacterized protein {ECO:0000313|Ensembl:ENSFCAP00000004274} (Fragment) OS=Felis catus (Cat) PE=4 SV=1	PREDICTED: olfactory receptor 52W1 [Felis catus]
gene14429	--	--	Molecular Function: G-protein coupled receptor activity (GO:0004930);; Molecular Function: olfactory receptor activity (GO:0004984);; Cellular Component: plasma membrane (GO:0005886);; Biological Process: G-protein coupled receptor signaling pathway (GO:0007186);; Cellular Component: integral component of membrane (GO:0016021);; Biological Process: detection of chemical stimulus involved in senso…	K04257|0|myd:102765597|olfactory receptor 5A1-like; K04257 olfactory receptor (A)	--	--	Olfactory receptor-like protein OLF2 OS=Canis familiaris (Dog) PE=3 SV=1	Olfactory receptor {ECO:0000256|RuleBase:RU000688} OS=Myotis davidii (David's myotis) PE=3 SV=1	PREDICTED: olfactory receptor 5A1-like [Myotis davidii]
gene14270	--	--	Molecular Function: G-protein coupled receptor activity (GO:0004930);; Molecular Function: olfactory receptor activity (GO:0004984);; Cellular Component: plasma membrane (GO:0005886);; Biological Process: G-protein coupled receptor signaling pathway (GO:0007186);; Cellular Component: integral component of membrane (GO:0016021);; Biological Process: detection of chemical stimulus involved in senso…	K04257|3.67275e-109|bom:102284124|olfactory receptor 52D1-like; K04257 olfactory receptor (A)	--	--	Olfactory receptor 1D2 GN=OR1D2 OS=Gorilla gorilla gorilla (Lowland gorilla) PE=3 SV=1	Uncharacterized protein {ECO:0000313|EMBL:ELR44977.1} (Fragment) OS=Bos mutus PE=4 SV=1	hypothetical protein M91_10090, partial [Bos mutus]
gene13268	--	--	Molecular Function: G-protein coupled receptor activity (GO:0004930);; Molecular Function: olfactory receptor activity (GO:0004984);; Cellular Component: plasma membrane (GO:0005886);; Biological Process: G-protein coupled receptor signaling pathway (GO:0007186);; Cellular Component: integral component of membrane (GO:0016021);; Biological Process: detection of chemical stimulus involved in senso…	K04257|0|fca:101099834|olfactory receptor 10AG1-like; K04257 olfactory receptor (A)	--	--	Olfactory receptor-like protein OLF1 OS=Canis familiaris (Dog) PE=3 SV=1	Olfactory receptor {ECO:0000256|RuleBase:RU000688} (Fragment) OS=Myotis lucifugus (Little brown bat) PE=3 SV=1	PREDICTED: olfactory receptor 10AG1-like [Myotis lucifugus]
gene14213	--	--	Molecular Function: G-protein coupled receptor activity (GO:0004930);; Molecular Function: olfactory receptor activity (GO:0004984);; Cellular Component: plasma membrane (GO:0005886);; Biological Process: G-protein coupled receptor signaling pathway (GO:0007186);; Cellular Component: integral component of membrane (GO:0016021);; Biological Process: detection of chemical stimulus involved in senso…	K04257|3.50598e-90|umr:103680347|olfactory receptor 2AJ1-like; K04257 olfactory receptor (A)	--	--	Olfactory receptor-like protein OLF3 OS=Canis familiaris (Dog) PE=3 SV=1	Olfactory receptor {ECO:0000256|RuleBase:RU000688} OS=Macaca fascicularis (Crab-eating macaque) PE=3 SV=1	PREDICTED: olfactory receptor 2T27-like [Erinaceus europaeus]
gene24602	--	--	Molecular Function: G-protein coupled receptor activity (GO:0004930);; Molecular Function: olfactory receptor activity (GO:0004984);; Cellular Component: plasma membrane (GO:0005886);; Biological Process: G-protein coupled receptor signaling pathway (GO:0007186);; Cellular Component: integral component of membrane (GO:0016021);; Biological Process: detection of chemical stimulus involved in senso…	K04257|4.89153e-156|umr:103676329|olfactory receptor 7G2-like; K04257 olfactory receptor (A)	--	--	Olfactory receptor-like protein OLF4 OS=Canis familiaris (Dog) PE=3 SV=1	Olfactory receptor {ECO:0000256|RuleBase:RU000688} OS=Felis catus (Cat) PE=3 SV=1	PREDICTED: olfactory receptor 7G2-like [Ursus maritimus]
gene5634	--	--	--	K04257|5.38845e-143|bom:102269485|olfactory receptor 5H2-like; K04257 olfactory receptor (A)	--	--	Olfactory receptor-like protein OLF1 OS=Canis familiaris (Dog) PE=3 SV=1	Olfactory receptor {ECO:0000256|RuleBase:RU000688} (Fragment) OS=Bos mutus PE=3 SV=1	PREDICTED: olfactory receptor 5H2-like [Vicugna pacos]
gene15232	--	--	Molecular Function: G-protein coupled receptor activity (GO:0004930);; Molecular Function: olfactory receptor activity (GO:0004984);; Cellular Component: plasma membrane (GO:0005886);; Biological Process: G-protein coupled receptor signaling pathway (GO:0007186);; Cellular Component: integral component of membrane (GO:0016021);; Biological Process: detection of chemical stimulus involved in senso…	K04257|2.76332e-157|ecb:100630679|olfactory receptor 2G2-like; K04257 olfactory receptor (A)	--	--	Olfactory receptor-like protein OLF3 OS=Canis familiaris (Dog) PE=3 SV=1	Olfactory receptor {ECO:0000256|RuleBase:RU000688} (Fragment) OS=Mustela putorius furo (European domestic ferret) PE=3 SV=1	PREDICTED: olfactory receptor 2G2-like [Odobenus rosmarus divergens]
gene22875	--	--	Molecular Function: G-protein coupled receptor activity (GO:0004930);; Molecular Function: olfactory receptor activity (GO:0004984);; Cellular Component: plasma membrane (GO:0005886);; Biological Process: G-protein coupled receptor signaling pathway (GO:0007186);; Cellular Component: integral component of membrane (GO:0016021);; Biological Process: detection of chemical stimulus involved in senso…	K04257|9.63446e-163|bta:509567|OR56A3; olfactory receptor, family 56, subfamily A, member 3; K04257 olfactory receptor (A)	--	--	Olfactory receptor 1G1 GN=OR1G1 OS=Gorilla gorilla gorilla (Lowland gorilla) PE=3 SV=1	Uncharacterized protein {ECO:0000313|Ensembl:ENSBTAP00000043136} OS=Bos taurus (Bovine) PE=4 SV=2	PREDICTED: olfactory receptor 56A3 [Bos taurus]
gene26724	--	--	Molecular Function: G-protein coupled receptor activity (GO:0004930);; Molecular Function: olfactory receptor activity (GO:0004984);; Cellular Component: plasma membrane (GO:0005886);; Cellular Component: integral component of membrane (GO:0016021);;	K04257|0|myb:102250017|olfactory receptor 52N5-like; K04257 olfactory receptor (A)	--	--	Olfactory receptor-like protein OLF3 OS=Canis familiaris (Dog) PE=3 SV=1	Olfactory receptor {ECO:0000256|RuleBase:RU000688} OS=Myotis lucifugus (Little brown bat) PE=3 SV=1	PREDICTED: olfactory receptor 52N5 [Eptesicus fuscus]
gene21712	--	--	Molecular Function: G-protein coupled receptor activity (GO:0004930);; Molecular Function: olfactory receptor activity (GO:0004984);; Cellular Component: plasma membrane (GO:0005886);; Cellular Component: integral component of membrane (GO:0016021);;	K04257|5.53699e-59|pale:102897804|olfactory receptor 10A6-like; K04257 olfactory receptor (A)	--	--	Olfactory receptor-like protein OLF3 OS=Canis familiaris (Dog) PE=3 SV=1	Olfactory receptor {ECO:0000256|RuleBase:RU000688} OS=Ovis aries (Sheep) PE=3 SV=1	PREDICTED: olfactory receptor 10A3-like [Ceratotherium simum simum]
gene18124	--	--	Molecular Function: G-protein coupled receptor activity (GO:0004930);; Molecular Function: olfactory receptor activity (GO:0004984);; Cellular Component: plasma membrane (GO:0005886);; Biological Process: G-protein coupled receptor signaling pathway (GO:0007186);; Cellular Component: integral component of membrane (GO:0016021);; Biological Process: detection of chemical stimulus involved in senso…	K04257|1.54311e-180|aml:100480519|olfactory receptor 51Q1-like; K04257 olfactory receptor (A)	--	--	Olfactory receptor 1E2 GN=OR1E2 OS=Gorilla gorilla gorilla (Lowland gorilla) PE=3 SV=1	Olfactory receptor {ECO:0000256|RuleBase:RU000688} (Fragment) OS=Ailuropoda melanoleuca (Giant panda) PE=3 SV=1	PREDICTED: olfactory receptor 51Q1-like [Ailuropoda melanoleuca]
gene23559	--	--	Molecular Function: G-protein coupled receptor activity (GO:0004930);; Molecular Function: olfactory receptor activity (GO:0004984);; Cellular Component: plasma membrane (GO:0005886);; Biological Process: G-protein coupled receptor signaling pathway (GO:0007186);; Cellular Component: integral component of membrane (GO:0016021);; Biological Process: detection of chemical stimulus involved in senso…	K04257|3.20102e-169|cfa:483556|OR5L1, OR08B05, cOR5L6P; olfactory receptor, family 5, subfamily L, member 1; K04257 olfactory receptor (A)	--	--	Olfactory receptor-like protein OLF1 OS=Canis familiaris (Dog) PE=3 SV=1	Olfactory receptor {ECO:0000256|RuleBase:RU000688} OS=Canis familiaris (Dog) PE=3 SV=1	PREDICTED: olfactory receptor 5L1 [Canis lupus familiaris]
gene8161	--	--	Molecular Function: signal transducer activity (GO:0004871);; Cellular Component: membrane (GO:0016020);; Biological Process: single-organism process (GO:0044699);; Biological Process: response to stimulus (GO:0050896);;	K04257|1.72862e-123|mcf:102138899|olfactory receptor 14A2-like; K04257 olfactory receptor (A)	--	--	Olfactory receptor 1D2 GN=OR1D2 OS=Pan troglodytes (Chimpanzee) PE=3 SV=1	Olfactory receptor {ECO:0000256|RuleBase:RU000688} OS=Macaca fascicularis (Crab-eating macaque) PE=3 SV=1	PREDICTED: olfactory receptor 14A2-like [Ursus maritimus]
gene14706	--	--	Molecular Function: G-protein coupled receptor activity (GO:0004930);; Molecular Function: olfactory receptor activity (GO:0004984);; Cellular Component: plasma membrane (GO:0005886);; Cellular Component: integral component of membrane (GO:0016021);;	K04257|1.62927e-160|fca:101081964|olfactory receptor 7D4-like; K04257 olfactory receptor (A)	--	--	Olfactory receptor-like protein OLF4 OS=Canis familiaris (Dog) PE=3 SV=1	Olfactory receptor {ECO:0000256|RuleBase:RU000688} OS=Felis catus (Cat) PE=3 SV=1	PREDICTED: olfactory receptor 7C2-like [Odobenus rosmarus divergens]
gene24518	--	--	Molecular Function: G-protein coupled receptor activity (GO:0004930);; Molecular Function: olfactory receptor activity (GO:0004984);; Cellular Component: plasma membrane (GO:0005886);; Biological Process: G-protein coupled receptor signaling pathway (GO:0007186);; Cellular Component: integral component of membrane (GO:0016021);; Biological Process: detection of chemical stimulus involved in senso…	K04257|6.26724e-98|cfa:100687724|olfactory receptor 4P4-like; K04257 olfactory receptor (A)	--	--	Olfactory receptor-like protein OLF4 OS=Canis familiaris (Dog) PE=3 SV=1	Olfactory receptor {ECO:0000256|RuleBase:RU000688} OS=Canis familiaris (Dog) PE=3 SV=1	PREDICTED: olfactory receptor 4P4-like [Canis lupus familiaris]
gene16409	--	--	Molecular Function: G-protein coupled receptor activity (GO:0004930);; Molecular Function: olfactory receptor activity (GO:0004984);; Cellular Component: plasma membrane (GO:0005886);; Biological Process: G-protein coupled receptor signaling pathway (GO:0007186);; Cellular Component: integral component of membrane (GO:0016021);; Biological Process: detection of chemical stimulus involved in senso…	K04257|1.87224e-134|tup:102501150|olfactory receptor 4X2-like; K04257 olfactory receptor (A)	--	--	Olfactory receptor-like protein OLF1 OS=Canis familiaris (Dog) PE=3 SV=1	Olfactory receptor {ECO:0000256|RuleBase:RU000688} OS=Pteropus alecto (Black flying fox) PE=3 SV=1	PREDICTED: olfactory receptor 4X2-like [Tupaia chinensis]
gene20499	--	--	Molecular Function: G-protein coupled receptor activity (GO:0004930);; Molecular Function: olfactory receptor activity (GO:0004984);; Cellular Component: plasma membrane (GO:0005886);; Biological Process: G-protein coupled receptor signaling pathway (GO:0007186);; Cellular Component: integral component of membrane (GO:0016021);; Biological Process: detection of chemical stimulus involved in senso…	K04257|0|cfa:485223|OR52B4, cOR52B7; cOR52B7 olfactory receptor family 52 subfamily B-like; K04257 olfactory receptor (A)	--	--	Olfactory receptor 1E1 GN=OR1E1 OS=Pan troglodytes (Chimpanzee) PE=3 SV=1	Olfactory receptor {ECO:0000256|RuleBase:RU000688} OS=Canis familiaris (Dog) PE=3 SV=2	PREDICTED: olfactory receptor 52B4 [Canis lupus familiaris]
gene20467	--	--	--	K04257|0|myb:102249122|olfactory receptor 5AK2-like; K04257 olfactory receptor (A)	--	--	Olfactory receptor-like protein OLF1 OS=Canis familiaris (Dog) PE=3 SV=1	Olfactory receptor {ECO:0000256|RuleBase:RU000688} OS=Felis catus (Cat) PE=3 SV=1	PREDICTED: putative olfactory receptor 5AK3 [Loxodonta africana]
gene26398	--	--	Molecular Function: G-protein coupled receptor activity (GO:0004930);; Molecular Function: olfactory receptor activity (GO:0004984);; Cellular Component: plasma membrane (GO:0005886);; Biological Process: G-protein coupled receptor signaling pathway (GO:0007186);; Cellular Component: integral component of membrane (GO:0016021);; Biological Process: detection of chemical stimulus involved in senso…	K04257|8.56025e-102|cfa:484985|OR7G6, OR04A12, cOR7G6; olfactory receptor; K04257 olfactory receptor (A)	--	--	Olfactory receptor-like protein OLF4 OS=Canis familiaris (Dog) PE=3 SV=1	Olfactory receptor {ECO:0000256|RuleBase:RU000688} OS=Felis catus (Cat) PE=3 SV=1	PREDICTED: olfactory receptor 7G2 [Canis lupus familiaris]
gene6908	--	--	Molecular Function: G-protein coupled receptor activity (GO:0004930);; Molecular Function: olfactory receptor activity (GO:0004984);; Cellular Component: plasma membrane (GO:0005886);; Biological Process: G-protein coupled receptor signaling pathway (GO:0007186);; Cellular Component: integral component of membrane (GO:0016021);; Biological Process: detection of chemical stimulus involved in senso…	K04257|0|umr:103672939|olfactory receptor 13H1; K04257 olfactory receptor (A)	--	--	Olfactory receptor-like protein OLF3 OS=Canis familiaris (Dog) PE=3 SV=1	Uncharacterized protein {ECO:0000313|Ensembl:ENSAMEP00000021325} (Fragment) OS=Ailuropoda melanoleuca (Giant panda) PE=4 SV=1	PREDICTED: olfactory receptor 13H1 [Ursus maritimus]
gene14460	--	--	Molecular Function: G-protein coupled receptor activity (GO:0004930);; Molecular Function: olfactory receptor activity (GO:0004984);; Cellular Component: plasma membrane (GO:0005886);; Biological Process: G-protein coupled receptor signaling pathway (GO:0007186);; Cellular Component: integral component of membrane (GO:0016021);; Biological Process: detection of chemical stimulus involved in senso…	K04257|0|pale:102887054|olfactory receptor 4K2-like; K04257 olfactory receptor (A)	--	--	Olfactory receptor 1A1 GN=OR1A1 OS=Pan troglodytes (Chimpanzee) PE=3 SV=1	Olfactory receptor {ECO:0000256|RuleBase:RU000688} OS=Loxodonta africana (African elephant) PE=3 SV=1	PREDICTED: olfactory receptor 4K2-like [Pteropus alecto]
gene8210	--	--	Molecular Function: G-protein coupled receptor activity (GO:0004930);; Molecular Function: olfactory receptor activity (GO:0004984);; Cellular Component: plasma membrane (GO:0005886);; Biological Process: G-protein coupled receptor signaling pathway (GO:0007186);; Cellular Component: integral component of membrane (GO:0016021);; Biological Process: detection of chemical stimulus involved in senso…	K04257|0|myb:102249458|olfactory receptor 6C2-like; K04257 olfactory receptor (A)	--	--	Olfactory receptor 1E5 GN=OR1E5 OS=Pan troglodytes (Chimpanzee) PE=3 SV=1	Olfactory receptor {ECO:0000256|RuleBase:RU000688} (Fragment) OS=Myotis lucifugus (Little brown bat) PE=3 SV=1	PREDICTED: olfactory receptor 6C2-like [Myotis lucifugus]
gene24314	--	--	Molecular Function: G-protein coupled receptor activity (GO:0004930);; Molecular Function: olfactory receptor activity (GO:0004984);; Cellular Component: plasma membrane (GO:0005886);; Biological Process: G-protein coupled receptor signaling pathway (GO:0007186);; Cellular Component: integral component of membrane (GO:0016021);; Biological Process: detection of chemical stimulus involved in senso…	K04257|4.41824e-111|ptg:102952098|olfactory receptor-like protein OLF3-like; K04257 olfactory receptor (A)	--	--	Olfactory receptor-like protein OLF3 OS=Canis familiaris (Dog) PE=3 SV=1	Olfactory receptor {ECO:0000256|RuleBase:RU000688} OS=Bos taurus (Bovine) PE=3 SV=1	PREDICTED: olfactory receptor-like protein OLF3-like [Panthera tigris altaica]
gene25765	--	--	--	K04257|1.03799e-132|umr:103676329|olfactory receptor 7G2-like; K04257 olfactory receptor (A)	--	--	Olfactory receptor-like protein OLF4 OS=Canis familiaris (Dog) PE=3 SV=1	Olfactory receptor {ECO:0000256|RuleBase:RU000688} OS=Mustela putorius furo (European domestic ferret) PE=3 SV=1	PREDICTED: olfactory receptor 7G2-like [Ursus maritimus]
gene23558	--	--	Molecular Function: G-protein coupled receptor activity (GO:0004930);; Molecular Function: olfactory receptor activity (GO:0004984);; Cellular Component: plasma membrane (GO:0005886);; Biological Process: G-protein coupled receptor signaling pathway (GO:0007186);; Cellular Component: integral component of membrane (GO:0016021);; Biological Process: detection of chemical stimulus involved in senso…	--	--	--	Olfactory receptor-like protein OLF2 OS=Canis familiaris (Dog) PE=3 SV=1	Olfactory receptor {ECO:0000256|RuleBase:RU000688} OS=Pteropus alecto (Black flying fox) PE=3 SV=1	PREDICTED: olfactory receptor 5L1-like [Echinops telfairi]
gene10932	--	--	Molecular Function: G-protein coupled receptor activity (GO:0004930);; Molecular Function: olfactory receptor activity (GO:0004984);; Cellular Component: plasma membrane (GO:0005886);; Cellular Component: integral component of membrane (GO:0016021);;	K04257|1.95071e-165|umr:103680620|olfactory receptor 5V1-like; K04257 olfactory receptor (A)	--	--	Olfactory receptor 1G1 GN=OR1G1 OS=Gorilla gorilla gorilla (Lowland gorilla) PE=3 SV=1	Olfactory receptor {ECO:0000256|RuleBase:RU000688} (Fragment) OS=Bos mutus PE=3 SV=1	PREDICTED: olfactory receptor 5V1-like [Ursus maritimus]
gene18131	--	--	Molecular Function: G-protein coupled receptor activity (GO:0004930);; Molecular Function: olfactory receptor activity (GO:0004984);; Cellular Component: plasma membrane (GO:0005886);; Biological Process: G-protein coupled receptor signaling pathway (GO:0007186);; Cellular Component: integral component of membrane (GO:0016021);; Biological Process: detection of chemical stimulus involved in senso…	K04257|0|ngi:103732105|olfactory receptor 51B4; K04257 olfactory receptor (A)	--	--	Olfactory receptor 1E1 GN=OR1E1 OS=Pan troglodytes (Chimpanzee) PE=3 SV=1	Olfactory receptor {ECO:0000256|RuleBase:RU000688} OS=Canis familiaris (Dog) PE=3 SV=1	PREDICTED: olfactory receptor 51B4-like [Canis lupus familiaris]
gene16381	--	--	Molecular Function: G-protein coupled receptor activity (GO:0004930);; Molecular Function: olfactory receptor activity (GO:0004984);; Cellular Component: plasma membrane (GO:0005886);; Biological Process: G-protein coupled receptor signaling pathway (GO:0007186);; Cellular Component: integral component of membrane (GO:0016021);; Biological Process: detection of chemical stimulus involved in senso…	K04257|0|ocu:100359120|olfactory receptor 6C2-like; K04257 olfactory receptor (A)	--	--	Olfactory receptor-like protein OLF1 OS=Canis familiaris (Dog) PE=3 SV=1	Olfactory receptor {ECO:0000256|RuleBase:RU000688} OS=Otolemur garnettii (Small-eared galago) PE=3 SV=1	PREDICTED: olfactory receptor 6C2-like [Galeopterus variegatus]
gene24785	--	--	Molecular Function: G-protein coupled receptor activity (GO:0004930);; Molecular Function: olfactory receptor activity (GO:0004984);; Cellular Component: plasma membrane (GO:0005886);; Biological Process: G-protein coupled receptor signaling pathway (GO:0007186);; Cellular Component: integral component of membrane (GO:0016021);; Biological Process: detection of chemical stimulus involved in senso…	K04257|0|ecb:100066640|olfactory receptor 52B4-like; K04257 olfactory receptor (A)	--	--	Olfactory receptor 1E1 GN=OR1E1 OS=Pan troglodytes (Chimpanzee) PE=3 SV=1	Olfactory receptor {ECO:0000256|RuleBase:RU000688} OS=Felis catus (Cat) PE=3 SV=1	PREDICTED: olfactory receptor 52B4-like [Equus caballus]
gene20075	--	--	--	K04257|1.4488e-176|cfr:102512400|olfactory receptor 8G1-like; K04257 olfactory receptor (A)	--	--	Olfactory receptor-like protein OLF2 OS=Canis familiaris (Dog) PE=3 SV=1	Olfactory receptor {ECO:0000256|RuleBase:RU000688} OS=Camelus ferus (Wild Bactrian camel) PE=3 SV=1	PREDICTED: olfactory receptor 8G1-like [Ceratotherium simum simum]
gene9040	--	--	Molecular Function: G-protein coupled receptor activity (GO:0004930);; Molecular Function: olfactory receptor activity (GO:0004984);; Cellular Component: plasma membrane (GO:0005886);; Biological Process: G-protein coupled receptor signaling pathway (GO:0007186);; Cellular Component: integral component of membrane (GO:0016021);; Biological Process: detection of chemical stimulus involved in senso…	K04257|0|ecb:100067194|olfactory receptor 51F2-like; K04257 olfactory receptor (A)	--	--	Olfactory receptor 3A2 GN=OR3A2 OS=Pan troglodytes (Chimpanzee) PE=3 SV=1	Olfactory receptor {ECO:0000256|RuleBase:RU000688} (Fragment) OS=Myotis lucifugus (Little brown bat) PE=3 SV=1	PREDICTED: olfactory receptor 51F2-like [Eptesicus fuscus]
gene15687	--	--	--	--	--	--	Olfactory receptor 3A2 GN=OR3A2 OS=Pan troglodytes (Chimpanzee) PE=3 SV=1	Olfactory receptor {ECO:0000256|RuleBase:RU000688} (Fragment) OS=Bos mutus PE=3 SV=1	PREDICTED: olfactory receptor 11L1-like [Leptonychotes weddellii]
gene7940	--	--	Molecular Function: G-protein coupled receptor activity (GO:0004930);; Molecular Function: olfactory receptor activity (GO:0004984);; Cellular Component: plasma membrane (GO:0005886);; Biological Process: G-protein coupled receptor signaling pathway (GO:0007186);; Cellular Component: integral component of membrane (GO:0016021);; Biological Process: detection of chemical stimulus involved in senso…	K04257|6.23825e-171|ngi:103750360|olfactory receptor 5V1-like; K04257 olfactory receptor (A)	--	--	Olfactory receptor 1G1 GN=OR1G1 OS=Gorilla gorilla gorilla (Lowland gorilla) PE=3 SV=1	Olfactory receptor {ECO:0000256|RuleBase:RU000688} (Fragment) OS=Loxodonta africana (African elephant) PE=3 SV=1	PREDICTED: olfactory receptor 5V1-like [Dasypus novemcinctus]
gene26820	--	--	Molecular Function: G-protein coupled receptor activity (GO:0004930);; Molecular Function: olfactory receptor activity (GO:0004984);; Cellular Component: plasma membrane (GO:0005886);; Biological Process: G-protein coupled receptor signaling pathway (GO:0007186);; Cellular Component: integral component of membrane (GO:0016021);; Biological Process: detection of chemical stimulus involved in senso…	K04257|0|cfr:102522227|putative olfactory receptor 52P1-like; K04257 olfactory receptor (A)	--	--	Olfactory receptor 1A1 GN=OR1A1 OS=Pan troglodytes (Chimpanzee) PE=3 SV=1	Olfactory receptor {ECO:0000256|RuleBase:RU000688} OS=Camelus ferus (Wild Bactrian camel) PE=3 SV=1	PREDICTED: olfactory receptor 52D1-like [Eptesicus fuscus]
gene20465	--	--	--	K04257|1.57739e-178|ssc:100517804|olfactory receptor 5AK2-like; K04257 olfactory receptor (A)	--	--	Olfactory receptor-like protein OLF1 OS=Canis familiaris (Dog) PE=3 SV=1	Olfactory receptor {ECO:0000256|RuleBase:RU000688} OS=Loxodonta africana (African elephant) PE=3 SV=1	PREDICTED: putative olfactory receptor 5AK3 [Loxodonta africana]
gene20119	--	--	Molecular Function: G-protein coupled receptor activity (GO:0004930);; Molecular Function: olfactory receptor activity (GO:0004984);; Cellular Component: plasma membrane (GO:0005886);; Biological Process: G-protein coupled receptor signaling pathway (GO:0007186);; Cellular Component: integral component of membrane (GO:0016021);; Biological Process: detection of chemical stimulus involved in senso…	K04257|0|cfr:102504188|uncharacterized LOC102504188; K04257 olfactory receptor (A)	--	--	Olfactory receptor-like protein OLF1 OS=Canis familiaris (Dog) PE=3 SV=1	Olfactory receptor {ECO:0000256|RuleBase:RU000688} (Fragment) OS=Loxodonta africana (African elephant) PE=3 SV=1	PREDICTED: olfactory receptor 476-like [Dasypus novemcinctus]
gene11000	--	--	Molecular Function: G-protein coupled receptor activity (GO:0004930);; Molecular Function: olfactory receptor activity (GO:0004984);; Cellular Component: plasma membrane (GO:0005886);; Biological Process: G-protein coupled receptor signaling pathway (GO:0007186);; Cellular Component: integral component of membrane (GO:0016021);; Biological Process: detection of chemical stimulus involved in senso…	K04257|0|bta:101908633|	--	--	Olfactory receptor-like protein OLF3 OS=Canis familiaris (Dog) PE=3 SV=1	Olfactory receptor {ECO:0000256|RuleBase:RU000688} OS=Equus caballus (Horse) PE=3 SV=1	PREDICTED: olfactory receptor 2B11-like [Bison bison bison]
gene25278	--	--	Molecular Function: G-protein coupled receptor activity (GO:0004930);; Molecular Function: olfactory receptor activity (GO:0004984);; Cellular Component: plasma membrane (GO:0005886);; Biological Process: G-protein coupled receptor signaling pathway (GO:0007186);; Cellular Component: integral component of membrane (GO:0016021);; Biological Process: detection of chemical stimulus involved in senso…	K04257|1.36249e-171|aml:100482962|olfactory receptor 8K3-like; K04257 olfactory receptor (A)	--	--	Olfactory receptor-like protein OLF2 OS=Canis familiaris (Dog) PE=3 SV=1	Olfactory receptor {ECO:0000256|RuleBase:RU000688} OS=Ailuropoda melanoleuca (Giant panda) PE=3 SV=1	PREDICTED: olfactory receptor 8K3-like [Ailuropoda melanoleuca]
gene18483	--	--	Molecular Function: G-protein coupled receptor activity (GO:0004930);; Molecular Function: olfactory receptor activity (GO:0004984);; Cellular Component: plasma membrane (GO:0005886);; Biological Process: G-protein coupled receptor signaling pathway (GO:0007186);; Cellular Component: integral component of membrane (GO:0016021);; Biological Process: detection of chemical stimulus involved in senso…	K04257|3.04424e-172|tup:102489210|olfactory receptor 6C2-like; K04257 olfactory receptor (A)	--	--	Olfactory receptor-like protein OLF1 OS=Canis familiaris (Dog) PE=3 SV=1	Olfactory receptor {ECO:0000256|RuleBase:RU000688} OS=Otolemur garnettii (Small-eared galago) PE=3 SV=1	PREDICTED: olfactory receptor 6C2-like [Tupaia chinensis]
gene21363	--	--	--	K04257|1.03601e-160|tup:102489478|olfactory receptor 6C2-like; K04257 olfactory receptor (A)	--	--	Olfactory receptor 1G1 GN=OR1G1 OS=Gorilla gorilla gorilla (Lowland gorilla) PE=3 SV=1	Olfactory receptor {ECO:0000256|RuleBase:RU000688} OS=Tupaia chinensis (Chinese tree shrew) PE=3 SV=1	PREDICTED: olfactory receptor 6C2-like [Mustela putorius furo]
gene17553	--	--	Molecular Function: G-protein coupled receptor activity (GO:0004930);; Molecular Function: olfactory receptor activity (GO:0004984);; Cellular Component: plasma membrane (GO:0005886);; Biological Process: G-protein coupled receptor signaling pathway (GO:0007186);; Cellular Component: integral component of membrane (GO:0016021);; Biological Process: detection of chemical stimulus involved in senso…	K04257|4.19866e-157|ecb:100064960|olfactory receptor 4A47-like; K04257 olfactory receptor (A)	--	--	Olfactory receptor 1E1 GN=OR1E1 OS=Pan troglodytes (Chimpanzee) PE=3 SV=1	Olfactory receptor {ECO:0000256|RuleBase:RU000688} OS=Ailuropoda melanoleuca (Giant panda) PE=3 SV=1	PREDICTED: olfactory receptor 4A47-like [Condylura cristata]
gene22621	--	--	Molecular Function: G-protein coupled receptor activity (GO:0004930);; Molecular Function: olfactory receptor activity (GO:0004984);; Cellular Component: plasma membrane (GO:0005886);; Biological Process: G-protein coupled receptor signaling pathway (GO:0007186);; Cellular Component: integral component of membrane (GO:0016021);; Biological Process: detection of chemical stimulus involved in senso…	--	--	--	Olfactory receptor-like protein OLF2 OS=Canis familiaris (Dog) PE=3 SV=1	Olfactory receptor {ECO:0000256|RuleBase:RU000688} (Fragment) OS=Canis familiaris (Dog) PE=3 SV=1	PREDICTED: olfactory receptor 5L1-like [Odobenus rosmarus divergens]
gene24671	--	--	Molecular Function: G-protein coupled receptor activity (GO:0004930);; Molecular Function: olfactory receptor activity (GO:0004984);; Cellular Component: plasma membrane (GO:0005886);; Biological Process: G-protein coupled receptor signaling pathway (GO:0007186);; Cellular Component: integral component of membrane (GO:0016021);; Biological Process: detection of chemical stimulus involved in senso…	K04257|1.98745e-158|umr:103676336|olfactory receptor 18-like; K04257 olfactory receptor (A)	--	--	Olfactory receptor-like protein OLF4 OS=Canis familiaris (Dog) PE=3 SV=1	Olfactory receptor {ECO:0000256|RuleBase:RU000688} OS=Felis catus (Cat) PE=3 SV=1	PREDICTED: olfactory receptor 18-like [Ursus maritimus]
gene25943	--	--	--	K04257|1.44161e-120|bom:102267905|olfactory receptor 8S1-like; K04257 olfactory receptor (A)	--	--	Olfactory receptor-like protein OLF4 OS=Canis familiaris (Dog) PE=3 SV=1	Olfactory receptor {ECO:0000256|RuleBase:RU000688} OS=Bos taurus (Bovine) PE=3 SV=2	PREDICTED: olfactory receptor 8S1-like [Ceratotherium simum simum]
gene11455	--	--	Molecular Function: G-protein coupled receptor activity (GO:0004930);; Molecular Function: olfactory receptor activity (GO:0004984);; Cellular Component: plasma membrane (GO:0005886);; Biological Process: G-protein coupled receptor signaling pathway (GO:0007186);; Cellular Component: integral component of membrane (GO:0016021);; Biological Process: detection of chemical stimulus involved in senso…	K04257|3.52345e-179|umr:103672132|olfactory receptor 6K2; K04257 olfactory receptor (A)	--	--	Olfactory receptor-like protein OLF3 OS=Canis familiaris (Dog) PE=3 SV=1	Olfactory receptor {ECO:0000256|RuleBase:RU000688} OS=Equus caballus (Horse) PE=3 SV=1	PREDICTED: olfactory receptor 6K2-like [Elephantulus edwardii]
gene22680	--	--	Molecular Function: G-protein coupled receptor activity (GO:0004930);; Molecular Function: olfactory receptor activity (GO:0004984);; Cellular Component: plasma membrane (GO:0005886);; Cellular Component: integral component of membrane (GO:0016021);;	K04257|0|umr:103680620|olfactory receptor 5V1-like; K04257 olfactory receptor (A)	--	--	Olfactory receptor-like protein OLF3 OS=Canis familiaris (Dog) PE=3 SV=1	Olfactory receptor {ECO:0000256|RuleBase:RU000688} (Fragment) OS=Bos mutus PE=3 SV=1	PREDICTED: olfactory receptor 5V1-like [Ursus maritimus]
gene4207	--	--	--	K04257|2.58795e-145|umr:103681216|olfactory receptor 51A7-like; K04257 olfactory receptor (A)	--	--	Olfactory receptor 3A3 GN=OR3A3 OS=Pan troglodytes (Chimpanzee) PE=3 SV=1	Olfactory receptor {ECO:0000256|RuleBase:RU000688} (Fragment) OS=Myotis lucifugus (Little brown bat) PE=3 SV=1	PREDICTED: olfactory receptor 51A7-like [Ursus maritimus]
gene5547	--	--	Molecular Function: G-protein coupled receptor activity (GO:0004930);; Molecular Function: olfactory receptor activity (GO:0004984);; Cellular Component: plasma membrane (GO:0005886);; Biological Process: G-protein coupled receptor signaling pathway (GO:0007186);; Cellular Component: integral component of membrane (GO:0016021);; Biological Process: detection of chemical stimulus involved in senso…	K04257|0|aml:100471215|olfactory receptor 51I1-like; K04257 olfactory receptor (A)	--	--	Olfactory receptor 1E5 GN=OR1E5 OS=Pan troglodytes (Chimpanzee) PE=3 SV=1	Olfactory receptor {ECO:0000256|RuleBase:RU000688} (Fragment) OS=Ailuropoda melanoleuca (Giant panda) PE=3 SV=1	PREDICTED: olfactory receptor 51I1 [Ailuropoda melanoleuca]
gene7726	--	--	Molecular Function: G-protein coupled receptor activity (GO:0004930);; Molecular Function: olfactory receptor activity (GO:0004984);; Cellular Component: plasma membrane (GO:0005886);; Biological Process: G-protein coupled receptor signaling pathway (GO:0007186);; Cellular Component: integral component of membrane (GO:0016021);; Biological Process: detection of chemical stimulus involved in senso…	K04257|1.51364e-166|mmu:258648|Olfr237-ps1, MOR261-4, Olfr438; olfactory receptor 237, pseudogene 1; K04257 olfactory receptor (A)	--	--	Olfactory receptor-like protein OLF3 OS=Canis familiaris (Dog) PE=3 SV=1	Olfactory receptor {ECO:0000256|RuleBase:RU000688} OS=Camelus ferus (Wild Bactrian camel) PE=3 SV=1	PREDICTED: olfactory receptor 2A14-like [Camelus dromedarius]
gene26363	--	--	Molecular Function: G-protein coupled receptor activity (GO:0004930);; Molecular Function: olfactory receptor activity (GO:0004984);; Cellular Component: plasma membrane (GO:0005886);; Biological Process: G-protein coupled receptor signaling pathway (GO:0007186);; Cellular Component: integral component of membrane (GO:0016021);; Biological Process: detection of chemical stimulus involved in senso…	K04257|0|cfr:102521682|olfactory receptor 5B3-like; K04257 olfactory receptor (A)	--	--	Olfactory receptor-like protein OLF2 OS=Canis familiaris (Dog) PE=3 SV=1	Olfactory receptor {ECO:0000256|RuleBase:RU000688} OS=Camelus ferus (Wild Bactrian camel) PE=3 SV=1	PREDICTED: olfactory receptor 5B3-like [Vicugna pacos]
gene26020	--	--	--	K04257|0|umr:103666171|olfactory receptor 4C11; K04257 olfactory receptor (A)	--	--	Olfactory receptor-like protein OLF1 OS=Canis familiaris (Dog) PE=3 SV=1	Olfactory receptor {ECO:0000256|RuleBase:RU000688} OS=Otolemur garnettii (Small-eared galago) PE=3 SV=1	PREDICTED: olfactory receptor 4C11-like [Mustela putorius furo]
gene25208	--	--	Molecular Function: G-protein coupled receptor activity (GO:0004930);; Molecular Function: olfactory receptor activity (GO:0004984);; Cellular Component: plasma membrane (GO:0005886);; Biological Process: G-protein coupled receptor signaling pathway (GO:0007186);; Cellular Component: integral component of membrane (GO:0016021);; Biological Process: detection of chemical stimulus involved in senso…	K04257|2.08855e-70|cge:103161419|putative olfactory receptor ENSP00000348552; K04257 olfactory receptor (A)	--	--	Olfactory receptor-like protein OLF3 OS=Canis familiaris (Dog) PE=3 SV=1	Olfactory receptor {ECO:0000256|RuleBase:RU000688} (Fragment) OS=Ailuropoda melanoleuca (Giant panda) PE=3 SV=1	PREDICTED: olfactory receptor 13C8 [Ailuropoda melanoleuca]
gene11472	--	--	Molecular Function: transmembrane signaling receptor activity (GO:0004888);; Biological Process: signal transduction (GO:0007165);; Biological Process: sensory perception of smell (GO:0007608);; Cellular Component: membrane (GO:0016020);;	K04257|1.47803e-96|umr:103679838|olfactory receptor 14C36; K04257 olfactory receptor (A)	--	--	Olfactory receptor 1G1 GN=OR1G1 OS=Gorilla gorilla gorilla (Lowland gorilla) PE=3 SV=1	Olfactory receptor {ECO:0000256|RuleBase:RU000688} OS=Loxodonta africana (African elephant) PE=3 SV=1	PREDICTED: olfactory receptor 14C36-like [Dasypus novemcinctus]
gene7006	--	--	Molecular Function: G-protein coupled receptor activity (GO:0004930);; Molecular Function: olfactory receptor activity (GO:0004984);; Cellular Component: plasma membrane (GO:0005886);; Biological Process: G-protein coupled receptor signaling pathway (GO:0007186);; Cellular Component: integral component of membrane (GO:0016021);; Biological Process: detection of chemical stimulus involved in senso…	K04257|3.87265e-161|umr:103666097|olfactory receptor 9G1-like; K04257 olfactory receptor (A)	--	--	Olfactory receptor-like protein OLF1 OS=Canis familiaris (Dog) PE=3 SV=1	Olfactory receptor {ECO:0000256|RuleBase:RU000688} (Fragment) OS=Ailuropoda melanoleuca (Giant panda) PE=3 SV=1	PREDICTED: olfactory receptor 9G1-like [Chrysochloris asiatica]
gene2366	--	--	Molecular Function: G-protein coupled receptor activity (GO:0004930);; Molecular Function: olfactory receptor activity (GO:0004984);; Cellular Component: plasma membrane (GO:0005886);; Biological Process: G-protein coupled receptor signaling pathway (GO:0007186);; Cellular Component: integral component of membrane (GO:0016021);; Biological Process: detection of chemical stimulus involved in senso…	K04257|0|hsa:130075|OR9A4; olfactory receptor, family 9, subfamily A, member 4; K04257 olfactory receptor (A)	--	--	Olfactory receptor-like protein OLF3 OS=Canis familiaris (Dog) PE=3 SV=1	Olfactory receptor {ECO:0000256|RuleBase:RU000688} OS=Canis familiaris (Dog) PE=3 SV=2	PREDICTED: olfactory receptor 9A4-like [Canis lupus familiaris]
gene11103	--	--	Molecular Function: G-protein coupled receptor activity (GO:0004930);; Molecular Function: olfactory receptor activity (GO:0004984);; Cellular Component: plasma membrane (GO:0005886);; Biological Process: G-protein coupled receptor signaling pathway (GO:0007186);; Cellular Component: integral component of membrane (GO:0016021);; Biological Process: detection of chemical stimulus involved in senso…	K04257|0|cfa:485239|cOR51C4; cOR51C4 olfactory receptor family 51 subfamily C-like; K04257 olfactory receptor (A)	--	--	Olfactory receptor 3A3 GN=OR3A3 OS=Pan troglodytes (Chimpanzee) PE=3 SV=1	Olfactory receptor {ECO:0000256|RuleBase:RU000688} OS=Tupaia chinensis (Chinese tree shrew) PE=3 SV=1	PREDICTED: olfactory receptor 51F2 [Canis lupus familiaris]
gene9414	--	--	Molecular Function: G-protein coupled receptor activity (GO:0004930);; Molecular Function: olfactory receptor activity (GO:0004984);; Cellular Component: plasma membrane (GO:0005886);; Biological Process: G-protein coupled receptor signaling pathway (GO:0007186);; Cellular Component: integral component of membrane (GO:0016021);; Biological Process: detection of chemical stimulus involved in senso…	K04257|1.56257e-172|umr:103656362|olfactory receptor 2M3-like; K04257 olfactory receptor (A)	--	--	Olfactory receptor-like protein OLF3 OS=Canis familiaris (Dog) PE=3 SV=1	Uncharacterized protein {ECO:0000313|Ensembl:ENSECAP00000002247} (Fragment) OS=Equus caballus (Horse) PE=4 SV=1	PREDICTED: olfactory receptor 2M3-like [Ceratotherium simum simum]
gene11465	--	--	Molecular Function: G-protein coupled receptor activity (GO:0004930);; Molecular Function: olfactory receptor activity (GO:0004984);; Cellular Component: plasma membrane (GO:0005886);; Biological Process: G-protein coupled receptor signaling pathway (GO:0007186);; Cellular Component: integral component of membrane (GO:0016021);; Biological Process: detection of chemical stimulus involved in senso…	K04257|2.24404e-142|cfr:102515961|olfactory receptor 10K1-like; K04257 olfactory receptor (A)	--	--	Olfactory receptor-like protein OLF3 OS=Canis familiaris (Dog) PE=3 SV=1	Olfactory receptor 10K1 {ECO:0000313|EMBL:EPY90206.1} OS=Camelus ferus (Wild Bactrian camel) PE=4 SV=1	PREDICTED: olfactory receptor 10K1-like [Camelus ferus]
gene19664	--	--	Molecular Function: G-protein coupled receptor activity (GO:0004930);; Molecular Function: olfactory receptor activity (GO:0004984);; Cellular Component: plasma membrane (GO:0005886);; Biological Process: G-protein coupled receptor signaling pathway (GO:0007186);; Cellular Component: integral component of membrane (GO:0016021);; Biological Process: detection of chemical stimulus involved in senso…	K04257|0|umr:103681166|olfactory receptor 51T1; K04257 olfactory receptor (A)	--	--	Olfactory receptor-like protein OLF4 OS=Canis familiaris (Dog) PE=3 SV=1	Olfactory receptor {ECO:0000256|RuleBase:RU000688} OS=Ailuropoda melanoleuca (Giant panda) PE=3 SV=1	PREDICTED: LOW QUALITY PROTEIN: olfactory receptor 51T1 [Equus przewalskii]
gene24558	--	--	Molecular Function: G-protein coupled receptor activity (GO:0004930);; Molecular Function: olfactory receptor activity (GO:0004984);; Cellular Component: plasma membrane (GO:0005886);; Biological Process: G-protein coupled receptor signaling pathway (GO:0007186);; Cellular Component: integral component of membrane (GO:0016021);; Biological Process: detection of chemical stimulus involved in senso…	K04257|7.06158e-121|tup:102470337|olfactory receptor 1G1-like; K04257 olfactory receptor (A)	--	--	Olfactory receptor 1G1 GN=OR1G1 OS=Gorilla gorilla gorilla (Lowland gorilla) PE=3 SV=1	Olfactory receptor family 1 {ECO:0000313|EMBL:AHW56175.1} (Fragment) OS=Pteropus giganteus (Indian flying fox) PE=4 SV=1	PREDICTED: olfactory receptor 1G1-like, partial [Echinops telfairi]
gene8553	--	--	Molecular Function: G-protein coupled receptor activity (GO:0004930);; Molecular Function: olfactory receptor activity (GO:0004984);; Cellular Component: plasma membrane (GO:0005886);; Biological Process: G-protein coupled receptor signaling pathway (GO:0007186);; Cellular Component: integral component of membrane (GO:0016021);; Biological Process: detection of chemical stimulus involved in senso…	K04257|0|ptg:102968689|olfactory receptor 5M3-like; K04257 olfactory receptor (A)	--	--	Olfactory receptor-like protein OLF1 OS=Canis familiaris (Dog) PE=3 SV=1	Olfactory receptor {ECO:0000256|RuleBase:RU000688} OS=Felis catus (Cat) PE=3 SV=1	PREDICTED: olfactory receptor 5M3-like [Panthera tigris altaica]
gene19670	--	--	Molecular Function: G-protein coupled receptor activity (GO:0004930);; Molecular Function: olfactory receptor activity (GO:0004984);; Cellular Component: plasma membrane (GO:0005886);; Biological Process: G-protein coupled receptor signaling pathway (GO:0007186);; Cellular Component: integral component of membrane (GO:0016021);; Biological Process: detection of chemical stimulus involved in senso…	K04257|0|aml:100480128|olfactory receptor 51F2-like; K04257 olfactory receptor (A)	--	--	Olfactory receptor 3A3 GN=OR3A3 OS=Pan troglodytes (Chimpanzee) PE=3 SV=1	Olfactory receptor {ECO:0000256|RuleBase:RU000688} (Fragment) OS=Ailuropoda melanoleuca (Giant panda) PE=3 SV=1	PREDICTED: olfactory receptor 51F2-like [Ailuropoda melanoleuca]
gene21211	--	--	Molecular Function: G-protein coupled receptor activity (GO:0004930);; Molecular Function: olfactory receptor activity (GO:0004984);; Cellular Component: plasma membrane (GO:0005886);; Biological Process: G-protein coupled receptor signaling pathway (GO:0007186);; Cellular Component: integral component of membrane (GO:0016021);; Biological Process: detection of chemical stimulus involved in senso…	K04257|1.38059e-169|umr:103666067|olfactory receptor 8H1-like; K04257 olfactory receptor (A)	--	--	Olfactory receptor-like protein OLF2 OS=Canis familiaris (Dog) PE=3 SV=1	Olfactory receptor {ECO:0000256|RuleBase:RU000688} OS=Mustela putorius furo (European domestic ferret) PE=3 SV=1	PREDICTED: olfactory receptor 8H1-like [Ursus maritimus]
gene13863	--	--	Molecular Function: G-protein coupled receptor activity (GO:0004930);; Molecular Function: olfactory receptor activity (GO:0004984);; Cellular Component: plasma membrane (GO:0005886);; Cellular Component: integral component of membrane (GO:0016021);;	--	--	--	Olfactory receptor 1E5 GN=OR1E5 OS=Pan troglodytes (Chimpanzee) PE=3 SV=1	Olfactory receptor {ECO:0000256|RuleBase:RU000688} (Fragment) OS=Bos taurus (Bovine) PE=3 SV=1	PREDICTED: olfactory receptor 6C2-like [Canis lupus familiaris]
gene23925	--	--	Molecular Function: G-protein coupled receptor activity (GO:0004930);; Molecular Function: olfactory receptor activity (GO:0004984);; Cellular Component: plasma membrane (GO:0005886);; Biological Process: G-protein coupled receptor signaling pathway (GO:0007186);; Cellular Component: integral component of membrane (GO:0016021);; Biological Process: detection of chemical stimulus involved in senso…	K04257|0|ptg:102956056|olfactory receptor 4C11-like; K04257 olfactory receptor (A)	--	--	Olfactory receptor-like protein OLF1 OS=Canis familiaris (Dog) PE=3 SV=1	Olfactory receptor {ECO:0000256|RuleBase:RU000688} OS=Otolemur garnettii (Small-eared galago) PE=3 SV=1	PREDICTED: olfactory receptor 4C11-like [Ceratotherium simum simum]
gene6194	--	--	Molecular Function: G-protein coupled receptor activity (GO:0004930);; Molecular Function: olfactory receptor activity (GO:0004984);; Cellular Component: plasma membrane (GO:0005886);; Biological Process: G-protein coupled receptor signaling pathway (GO:0007186);; Cellular Component: integral component of membrane (GO:0016021);; Biological Process: detection of chemical stimulus involved in senso…	K04257|7.625e-162|umr:103680795|olfactory receptor 2M3; K04257 olfactory receptor (A)	--	--	Olfactory receptor-like protein OLF3 OS=Canis familiaris (Dog) PE=3 SV=1	Uncharacterized protein {ECO:0000313|Ensembl:ENSSSCP00000024211} OS=Sus scrofa (Pig) PE=4 SV=1	PREDICTED: olfactory receptor 2M3 [Ursus maritimus]
gene22505	--	--	Molecular Function: G-protein coupled receptor activity (GO:0004930);; Molecular Function: olfactory receptor activity (GO:0004984);; Cellular Component: plasma membrane (GO:0005886);; Biological Process: G-protein coupled receptor signaling pathway (GO:0007186);; Cellular Component: integral component of membrane (GO:0016021);; Biological Process: detection of chemical stimulus involved in senso…	K04257|3.64816e-140|aml:100473147|olfactory receptor 2T2-like; K04257 olfactory receptor (A)	--	--	Olfactory receptor-like protein OLF3 OS=Canis familiaris (Dog) PE=3 SV=1	Olfactory receptor {ECO:0000256|RuleBase:RU000688} (Fragment) OS=Loxodonta africana (African elephant) PE=3 SV=1	PREDICTED: olfactory receptor 56-like [Erinaceus europaeus]
gene17954	--	--	Molecular Function: G-protein coupled receptor activity (GO:0004930);; Molecular Function: olfactory receptor activity (GO:0004984);; Cellular Component: plasma membrane (GO:0005886);; Biological Process: G-protein coupled receptor signaling pathway (GO:0007186);; Cellular Component: integral component of membrane (GO:0016021);; Biological Process: detection of chemical stimulus involved in senso…	K04257|8.27815e-161|umr:103676329|olfactory receptor 7G2-like; K04257 olfactory receptor (A)	--	--	Olfactory receptor-like protein OLF4 OS=Canis familiaris (Dog) PE=3 SV=1	Olfactory receptor {ECO:0000256|RuleBase:RU000688} OS=Felis catus (Cat) PE=3 SV=1	PREDICTED: olfactory receptor 7G2-like [Ursus maritimus]
gene15272	--	--	Molecular Function: G-protein coupled receptor activity (GO:0004930);; Molecular Function: olfactory receptor activity (GO:0004984);; Cellular Component: plasma membrane (GO:0005886);; Biological Process: G-protein coupled receptor signaling pathway (GO:0007186);; Cellular Component: integral component of membrane (GO:0016021);; Biological Process: detection of chemical stimulus involved in senso…	K04257|1.09335e-139|bom:102274857|olfactory receptor 8D2-like; K04257 olfactory receptor (A)	--	--	Olfactory receptor-like protein OLF2 OS=Canis familiaris (Dog) PE=3 SV=1	Uncharacterized protein {ECO:0000313|EMBL:ELR56606.1} (Fragment) OS=Bos mutus PE=4 SV=1	PREDICTED: olfactory receptor 8D2-like [Bos mutus]
gene21133	--	--	Molecular Function: G-protein coupled receptor activity (GO:0004930);; Molecular Function: olfactory receptor activity (GO:0004984);; Cellular Component: plasma membrane (GO:0005886);; Cellular Component: integral component of membrane (GO:0016021);;	K04257|0|ssc:100515362|olfactory receptor 2B11-like; K04257 olfactory receptor (A)	--	--	Olfactory receptor-like protein OLF3 OS=Canis familiaris (Dog) PE=3 SV=1	Olfactory receptor {ECO:0000256|RuleBase:RU000688} OS=Sus scrofa (Pig) PE=3 SV=2	PREDICTED: olfactory receptor 2B11-like [Sus scrofa]
gene23896	--	--	Molecular Function: G-protein coupled receptor activity (GO:0004930);; Molecular Function: olfactory receptor activity (GO:0004984);; Cellular Component: plasma membrane (GO:0005886);; Biological Process: G-protein coupled receptor signaling pathway (GO:0007186);; Cellular Component: integral component of membrane (GO:0016021);; Biological Process: detection of chemical stimulus involved in senso…	K04257|0|ecb:100067155|olfactory receptor 6Q1-like; K04257 olfactory receptor (A)	--	--	Olfactory receptor 1G1 GN=OR1G1 OS=Gorilla gorilla gorilla (Lowland gorilla) PE=3 SV=1	Olfactory receptor {ECO:0000256|RuleBase:RU000688} OS=Equus caballus (Horse) PE=3 SV=1	PREDICTED: olfactory receptor 6Q1 [Erinaceus europaeus]
gene15204	--	--	Molecular Function: signal transducer activity (GO:0004871);; Cellular Component: membrane (GO:0016020);; Biological Process: single-organism process (GO:0044699);; Biological Process: response to stimulus (GO:0050896);;	K04257|5.03333e-75|bta:508140|OR10H1; olfactory receptor, family 10, subfamily H, member 1; K04257 olfactory receptor (A)	--	--	Olfactory receptor-like protein OLF1 OS=Canis familiaris (Dog) PE=3 SV=1	Olfactory receptor 10H1 {ECO:0000313|EMBL:ELR50217.1} OS=Bos mutus PE=4 SV=1	Olfactory receptor 10H1 [Bos mutus]
gene11790	--	--	Molecular Function: G-protein coupled receptor activity (GO:0004930);; Molecular Function: olfactory receptor activity (GO:0004984);; Cellular Component: plasma membrane (GO:0005886);; Cellular Component: integral component of membrane (GO:0016021);;	K04257|0|myb:102242592|olfactory receptor 2B11-like; K04257 olfactory receptor (A)	--	--	Olfactory receptor-like protein OLF3 OS=Canis familiaris (Dog) PE=3 SV=1	Olfactory receptor {ECO:0000256|RuleBase:RU000688} OS=Myotis lucifugus (Little brown bat) PE=3 SV=1	PREDICTED: olfactory receptor 2B11-like [Myotis brandtii]
gene26751	--	--	Molecular Function: G-protein coupled receptor activity (GO:0004930);; Molecular Function: olfactory receptor activity (GO:0004984);; Cellular Component: plasma membrane (GO:0005886);; Biological Process: G-protein coupled receptor signaling pathway (GO:0007186);; Cellular Component: integral component of membrane (GO:0016021);; Biological Process: detection of chemical stimulus involved in senso…	K04257|4.22067e-104|cfa:608585|olfactory receptor 13-like; K04257 olfactory receptor (A)	--	--	Olfactory receptor-like protein OLF3 OS=Canis familiaris (Dog) PE=3 SV=1	Olfactory receptor {ECO:0000256|RuleBase:RU000688} OS=Canis familiaris (Dog) PE=3 SV=1	PREDICTED: olfactory receptor 13-like [Canis lupus familiaris]
gene21416	--	--	Molecular Function: G-protein coupled receptor activity (GO:0004930);; Molecular Function: olfactory receptor activity (GO:0004984);; Cellular Component: plasma membrane (GO:0005886);; Biological Process: G-protein coupled receptor signaling pathway (GO:0007186);; Cellular Component: integral component of membrane (GO:0016021);; Biological Process: detection of chemical stimulus involved in senso…	K04257|0|tup:102471678|olfactory receptor 52E2-like; K04257 olfactory receptor (A)	--	--	Olfactory receptor 3A3 GN=OR3A3 OS=Pan troglodytes (Chimpanzee) PE=3 SV=1	Olfactory receptor {ECO:0000256|RuleBase:RU000688} OS=Tupaia chinensis (Chinese tree shrew) PE=3 SV=1	PREDICTED: olfactory receptor 52E2-like [Tupaia chinensis]
gene5249	--	--	Molecular Function: G-protein coupled receptor activity (GO:0004930);; Molecular Function: olfactory receptor activity (GO:0004984);; Cellular Component: plasma membrane (GO:0005886);; Cellular Component: integral component of membrane (GO:0016021);;	K04257|8.62945e-156|cfr:102518965|olfactory receptor 11H7-like; K04257 olfactory receptor (A)	--	--	Olfactory receptor-like protein DTMT OS=Canis familiaris (Dog) PE=3 SV=1	Olfactory receptor {ECO:0000256|RuleBase:RU000688} OS=Camelus ferus (Wild Bactrian camel) PE=3 SV=1	PREDICTED: olfactory receptor 11H7 [Camelus bactrianus]
gene25516	--	--	--	K04257|0|myb:102254537|olfactory receptor 52A5-like; K04257 olfactory receptor (A)	--	--	Olfactory receptor 1A1 GN=OR1A1 OS=Pan troglodytes (Chimpanzee) PE=3 SV=1	Olfactory receptor {ECO:0000256|RuleBase:RU000688} OS=Myotis lucifugus (Little brown bat) PE=3 SV=1	PREDICTED: olfactory receptor 52A5-like [Myotis lucifugus]
gene11463	--	--	Molecular Function: G-protein coupled receptor activity (GO:0004930);; Molecular Function: olfactory receptor activity (GO:0004984);; Cellular Component: plasma membrane (GO:0005886);; Biological Process: G-protein coupled receptor signaling pathway (GO:0007186);; Cellular Component: integral component of membrane (GO:0016021);; Biological Process: detection of chemical stimulus involved in senso…	K04257|0|aml:100471799|olfactory receptor 10R2-like; K04257 olfactory receptor (A)	--	--	Olfactory receptor-like protein OLF1 OS=Canis familiaris (Dog) PE=3 SV=1	Olfactory receptor {ECO:0000256|RuleBase:RU000688} (Fragment) OS=Loxodonta africana (African elephant) PE=3 SV=1	PREDICTED: olfactory receptor 10R2-like [Condylura cristata]
gene5542	--	--	Molecular Function: G-protein coupled receptor activity (GO:0004930);; Molecular Function: olfactory receptor activity (GO:0004984);; Biological Process: G-protein coupled receptor signaling pathway (GO:0007186);; Cellular Component: integral component of membrane (GO:0016021);; Biological Process: detection of chemical stimulus involved in sensory perception of smell (GO:0050911);;	K04257|0|cfa:485262|olfactory receptor 51L1-like; K04257 olfactory receptor (A)	--	--	Olfactory receptor 1E1 GN=OR1E1 OS=Pan troglodytes (Chimpanzee) PE=3 SV=1	Uncharacterized protein {ECO:0000313|Ensembl:ENSCAFP00000035726} OS=Canis familiaris (Dog) PE=4 SV=2	PREDICTED: olfactory receptor 51L1-like [Canis lupus familiaris]
gene20896	--	--	Molecular Function: G-protein coupled receptor activity (GO:0004930);; Molecular Function: olfactory receptor activity (GO:0004984);; Cellular Component: plasma membrane (GO:0005886);; Biological Process: G-protein coupled receptor signaling pathway (GO:0007186);; Cellular Component: integral component of membrane (GO:0016021);; Biological Process: detection of chemical stimulus involved in senso…	K04257|5.60531e-146|fca:101096669|olfactory receptor 5AN1-like; K04257 olfactory receptor (A)	--	--	Olfactory receptor-like protein OLF1 OS=Canis familiaris (Dog) PE=3 SV=1	Olfactory receptor {ECO:0000256|RuleBase:RU000688} OS=Felis catus (Cat) PE=3 SV=1	PREDICTED: olfactory receptor 5AN1-like [Felis catus]
gene15489	--	--	Molecular Function: G-protein coupled receptor activity (GO:0004930);; Molecular Function: olfactory receptor activity (GO:0004984);; Cellular Component: plasma membrane (GO:0005886);; Biological Process: G-protein coupled receptor signaling pathway (GO:0007186);; Cellular Component: integral component of membrane (GO:0016021);; Biological Process: detection of chemical stimulus involved in senso…	K04257|0|cfa:100683351|olfactory receptor 481-like; K04257 olfactory receptor (A)	--	--	Olfactory receptor-like protein OLF1 OS=Canis familiaris (Dog) PE=3 SV=1	Olfactory receptor {ECO:0000256|RuleBase:RU000688} (Fragment) OS=Canis familiaris (Dog) PE=3 SV=1	PREDICTED: olfactory receptor 481-like [Ceratotherium simum simum]
gene1333	--	--	Molecular Function: G-protein coupled receptor activity (GO:0004930);; Molecular Function: olfactory receptor activity (GO:0004984);; Cellular Component: plasma membrane (GO:0005886);; Biological Process: G-protein coupled receptor signaling pathway (GO:0007186);; Cellular Component: integral component of membrane (GO:0016021);; Biological Process: detection of chemical stimulus involved in senso…	K04257|0|cfr:102519919|olfactory receptor 1F12-like; K04257 olfactory receptor (A)	--	--	Olfactory receptor 1E1 GN=OR1E1 OS=Pan troglodytes (Chimpanzee) PE=3 SV=1	Olfactory receptor {ECO:0000256|RuleBase:RU000688} OS=Otolemur garnettii (Small-eared galago) PE=3 SV=1	PREDICTED: olfactory receptor 1F12 [Galeopterus variegatus]
gene20313	--	--	Molecular Function: signal transducer activity (GO:0004871);; Cellular Component: membrane (GO:0016020);; Biological Process: single-organism process (GO:0044699);; Biological Process: response to stimulus (GO:0050896);;	K04257|2.29378e-105|bacu:103011083|olfactory receptor 2A2-like; K04257 olfactory receptor (A)	--	--	Olfactory receptor-like protein OLF3 OS=Canis familiaris (Dog) PE=3 SV=1	Uncharacterized protein {ECO:0000313|Ensembl:ENSLAFP00000025873} OS=Loxodonta africana (African elephant) PE=4 SV=1	PREDICTED: olfactory receptor 2A12-like [Loxodonta africana]
gene1990	--	--	Molecular Function: G-protein coupled receptor activity (GO:0004930);; Molecular Function: olfactory receptor activity (GO:0004984);; Cellular Component: plasma membrane (GO:0005886);; Cellular Component: integral component of membrane (GO:0016021);;	K04257|7.05146e-113|hsa:403239|OR2T27; olfactory receptor, family 2, subfamily T, member 27; K04257 olfactory receptor (A)	--	--	Olfactory receptor-like protein OLF3 OS=Canis familiaris (Dog) PE=3 SV=1	Olfactory receptor {ECO:0000256|RuleBase:RU000688} OS=Bos mutus PE=3 SV=1	PREDICTED: olfactory receptor 2T27-like [Bos mutus]
gene20974	--	--	Molecular Function: G-protein coupled receptor activity (GO:0004930);; Molecular Function: olfactory receptor activity (GO:0004984);; Cellular Component: plasma membrane (GO:0005886);; Biological Process: G-protein coupled receptor signaling pathway (GO:0007186);; Cellular Component: integral component of membrane (GO:0016021);; Biological Process: detection of chemical stimulus involved in senso…	K04257|2.39066e-177|ptg:102951697|olfactory receptor 10AG1-like; K04257 olfactory receptor (A)	--	--	Olfactory receptor 1G1 GN=OR1G1 OS=Gorilla gorilla gorilla (Lowland gorilla) PE=3 SV=1	Olfactory receptor {ECO:0000256|RuleBase:RU000688} OS=Loxodonta africana (African elephant) PE=3 SV=1	PREDICTED: olfactory receptor 10AG1-like [Panthera tigris altaica]
gene9043	--	--	Molecular Function: G-protein coupled receptor activity (GO:0004930);; Molecular Function: olfactory receptor activity (GO:0004984);; Biological Process: G-protein coupled receptor signaling pathway (GO:0007186);; Cellular Component: integral component of membrane (GO:0016021);; Biological Process: detection of chemical stimulus involved in sensory perception of smell (GO:0050911);;	K04257|0|ecb:100067194|olfactory receptor 51F2-like; K04257 olfactory receptor (A)	--	--	Olfactory receptor-like protein OLF1 OS=Canis familiaris (Dog) PE=3 SV=1	Olfactory receptor {ECO:0000256|RuleBase:RU000688} (Fragment) OS=Myotis lucifugus (Little brown bat) PE=3 SV=1	PREDICTED: olfactory receptor 51F2-like [Eptesicus fuscus]
gene13479	--	--	Molecular Function: G-protein coupled receptor activity (GO:0004930);; Molecular Function: olfactory receptor activity (GO:0004984);; Cellular Component: plasma membrane (GO:0005886);; Biological Process: G-protein coupled receptor signaling pathway (GO:0007186);; Cellular Component: integral component of membrane (GO:0016021);; Biological Process: detection of chemical stimulus involved in senso…	K04257|5.66032e-113|fca:101101260|olfactory receptor 13D1-like; K04257 olfactory receptor (A)	--	--	Olfactory receptor-like protein OLF3 OS=Canis familiaris (Dog) PE=3 SV=1	Olfactory receptor {ECO:0000256|RuleBase:RU000688} OS=Felis catus (Cat) PE=3 SV=1	PREDICTED: olfactory receptor 13D1 [Felis catus]
gene4202	--	--	--	K04257|1.68389e-174|umr:103681216|olfactory receptor 51A7-like; K04257 olfactory receptor (A)	--	--	Olfactory receptor 1E1 GN=OR1E1 OS=Pan troglodytes (Chimpanzee) PE=3 SV=1	Olfactory receptor {ECO:0000256|RuleBase:RU000688} (Fragment) OS=Myotis lucifugus (Little brown bat) PE=3 SV=1	PREDICTED: olfactory receptor 51A7-like [Ursus maritimus]
gene5247	--	--	Molecular Function: G-protein coupled receptor activity (GO:0004930);; Molecular Function: olfactory receptor activity (GO:0004984);; Cellular Component: plasma membrane (GO:0005886);; Biological Process: G-protein coupled receptor signaling pathway (GO:0007186);; Cellular Component: integral component of membrane (GO:0016021);; Biological Process: detection of chemical stimulus involved in senso…	K04257|1.13096e-169|bta:783845|olfactory receptor 11H4; K04257 olfactory receptor (A)	--	--	Olfactory receptor-like protein OLF1 OS=Canis familiaris (Dog) PE=3 SV=1	Olfactory receptor {ECO:0000256|RuleBase:RU000688} (Fragment) OS=Felis catus (Cat) PE=3 SV=1	PREDICTED: olfactory receptor 11H4-like [Ceratotherium simum simum]
gene21412	--	--	Molecular Function: G-protein coupled receptor activity (GO:0004930);; Molecular Function: olfactory receptor activity (GO:0004984);; Cellular Component: plasma membrane (GO:0005886);; Biological Process: G-protein coupled receptor signaling pathway (GO:0007186);; Cellular Component: integral component of membrane (GO:0016021);; Biological Process: detection of chemical stimulus involved in senso…	K04257|0|umr:103681182|olfactory receptor 52E1-like; K04257 olfactory receptor (A)	--	--	Olfactory receptor 3A3 GN=OR3A3 OS=Pan troglodytes (Chimpanzee) PE=3 SV=1	Olfactory receptor {ECO:0000256|RuleBase:RU000688} OS=Oryctolagus cuniculus (Rabbit) PE=3 SV=1	PREDICTED: olfactory receptor 52E1-like [Ursus maritimus]
gene11967	--	--	Molecular Function: G-protein coupled receptor activity (GO:0004930);; Molecular Function: olfactory receptor activity (GO:0004984);; Cellular Component: plasma membrane (GO:0005886);; Biological Process: G-protein coupled receptor signaling pathway (GO:0007186);; Cellular Component: integral component of membrane (GO:0016021);; Biological Process: detection of chemical stimulus involved in senso…	K04257|1.23674e-175|ecb:100052683|olfactory receptor 9G1-like; K04257 olfactory receptor (A)	--	--	Olfactory receptor-like protein OLF1 OS=Canis familiaris (Dog) PE=3 SV=1	Olfactory receptor {ECO:0000256|RuleBase:RU000688} OS=Felis catus (Cat) PE=3 SV=1	PREDICTED: LOW QUALITY PROTEIN: olfactory receptor 9G9-like [Mustela putorius furo]
gene2261	--	--	Molecular Function: G-protein coupled receptor activity (GO:0004930);; Molecular Function: olfactory receptor activity (GO:0004984);; Cellular Component: plasma membrane (GO:0005886);; Biological Process: G-protein coupled receptor signaling pathway (GO:0007186);; Cellular Component: integral component of membrane (GO:0016021);; Biological Process: detection of chemical stimulus involved in senso…	K04257|1.27286e-170|ecb:100058198|olfactory receptor 8S1-like; K04257 olfactory receptor (A)	--	--	Olfactory receptor 1G1 GN=OR1G1 OS=Gorilla gorilla gorilla (Lowland gorilla) PE=3 SV=1	Olfactory receptor {ECO:0000256|RuleBase:RU000688} OS=Equus caballus (Horse) PE=3 SV=1	PREDICTED: olfactory receptor 8S1-like [Equus caballus]
gene1991	--	--	Molecular Function: G-protein coupled receptor activity (GO:0004930);; Molecular Function: olfactory receptor activity (GO:0004984);; Cellular Component: plasma membrane (GO:0005886);; Biological Process: G-protein coupled receptor signaling pathway (GO:0007186);; Cellular Component: integral component of membrane (GO:0016021);; Biological Process: detection of chemical stimulus involved in senso…	K04257|3.61386e-169|umr:103656364|olfactory receptor 2T2; K04257 olfactory receptor (A)	--	--	Olfactory receptor-like protein OLF3 OS=Canis familiaris (Dog) PE=3 SV=1	Olfactory receptor {ECO:0000256|RuleBase:RU000688} OS=Camelus ferus (Wild Bactrian camel) PE=3 SV=1	PREDICTED: olfactory receptor 2T2 [Ursus maritimus]
gene23291	--	--	Molecular Function: G-protein coupled receptor activity (GO:0004930);; Molecular Function: olfactory receptor activity (GO:0004984);; Cellular Component: plasma membrane (GO:0005886);; Biological Process: G-protein coupled receptor signaling pathway (GO:0007186);; Cellular Component: integral component of membrane (GO:0016021);; Biological Process: detection of chemical stimulus involved in senso…	K04257|0|myb:102252680|olfactory receptor 52E5-like; K04257 olfactory receptor (A)	--	--	Olfactory receptor 1E5 GN=OR1E5 OS=Pan troglodytes (Chimpanzee) PE=3 SV=1	Olfactory receptor {ECO:0000256|RuleBase:RU000688} OS=Rhinolophus ferrumequinum (Greater horseshoe bat) PE=3 SV=1	PREDICTED: olfactory receptor 52E5-like [Dasypus novemcinctus]
gene16568	--	--	Molecular Function: G-protein coupled receptor activity (GO:0004930);; Molecular Function: olfactory receptor activity (GO:0004984);; Cellular Component: plasma membrane (GO:0005886);; Biological Process: signal transduction (GO:0007165);; Biological Process: sensory perception of smell (GO:0007608);; Cellular Component: integral component of membrane (GO:0016021);;	K04257|9.89726e-158|ssc:100622735|olfactory receptor 2AJ1-like; K04257 olfactory receptor (A)	--	--	Olfactory receptor-like protein OLF1 OS=Canis familiaris (Dog) PE=3 SV=1	Olfactory receptor {ECO:0000256|RuleBase:RU000688} (Fragment) OS=Mustela putorius furo (European domestic ferret) PE=3 SV=1	PREDICTED: olfactory receptor 2AJ1-like [Sus scrofa]
gene17899	--	--	Molecular Function: G-protein coupled receptor activity (GO:0004930);; Molecular Function: olfactory receptor activity (GO:0004984);; Cellular Component: plasma membrane (GO:0005886);; Biological Process: G-protein coupled receptor signaling pathway (GO:0007186);; Cellular Component: integral component of membrane (GO:0016021);; Biological Process: detection of chemical stimulus involved in senso…	K04257|0|tup:102470764|olfactory receptor 5C1-like; K04257 olfactory receptor (A)	--	--	Olfactory receptor-like protein OLF2 OS=Canis familiaris (Dog) PE=3 SV=1	Olfactory receptor {ECO:0000256|RuleBase:RU000688} OS=Tupaia chinensis (Chinese tree shrew) PE=3 SV=1	PREDICTED: olfactory receptor 5C1-like [Ceratotherium simum simum]
gene22966	--	--	Molecular Function: G-protein coupled receptor activity (GO:0004930);; Molecular Function: olfactory receptor activity (GO:0004984);; Cellular Component: plasma membrane (GO:0005886);; Biological Process: G-protein coupled receptor signaling pathway (GO:0007186);; Cellular Component: integral component of membrane (GO:0016021);; Biological Process: detection of chemical stimulus involved in senso…	K04257|1.63792e-176|cfa:483603|cOR4C43; cOR4C43 olfactory receptor family 4 subfamily C-like; K04257 olfactory receptor (A)	--	--	Olfactory receptor 1E2 GN=OR1E2 OS=Pan troglodytes (Chimpanzee) PE=3 SV=1	Olfactory receptor {ECO:0000256|RuleBase:RU000688} OS=Canis familiaris (Dog) PE=3 SV=1	PREDICTED: olfactory receptor 4C46 [Canis lupus familiaris]
gene22186	--	--	Molecular Function: G-protein coupled receptor activity (GO:0004930);; Molecular Function: olfactory receptor activity (GO:0004984);; Cellular Component: plasma membrane (GO:0005886);; Cellular Component: integral component of membrane (GO:0016021);;	K04257|1.42385e-153|ecb:100058198|olfactory receptor 8S1-like; K04257 olfactory receptor (A)	--	--	Olfactory receptor-like protein DTMT OS=Canis familiaris (Dog) PE=3 SV=1	Olfactory receptor {ECO:0000256|RuleBase:RU000688} OS=Equus caballus (Horse) PE=3 SV=1	PREDICTED: olfactory receptor 8S1-like [Ceratotherium simum simum]
gene26423	--	--	Molecular Function: G-protein coupled receptor activity (GO:0004930);; Molecular Function: olfactory receptor activity (GO:0004984);; Cellular Component: plasma membrane (GO:0005886);; Biological Process: G-protein coupled receptor signaling pathway (GO:0007186);; Cellular Component: integral component of membrane (GO:0016021);; Biological Process: detection of chemical stimulus involved in senso…	K04257|4.76677e-167|ecb:100050381|olfactory receptor 9A4-like; K04257 olfactory receptor (A)	--	--	Olfactory receptor-like protein OLF1 OS=Canis familiaris (Dog) PE=3 SV=1	Olfactory receptor {ECO:0000256|RuleBase:RU000688} OS=Equus caballus (Horse) PE=3 SV=1	PREDICTED: olfactory receptor 9A4-like isoform 1 [Equus caballus]
gene13613	--	--	Molecular Function: G-protein coupled receptor activity (GO:0004930);; Molecular Function: olfactory receptor activity (GO:0004984);; Cellular Component: plasma membrane (GO:0005886);; Biological Process: G-protein coupled receptor signaling pathway (GO:0007186);; Cellular Component: integral component of membrane (GO:0016021);; Biological Process: detection of chemical stimulus involved in senso…	K04257|0|ecb:100058174|olfactory receptor 11H12-like; K04257 olfactory receptor (A)	--	--	Olfactory receptor 1D2 GN=OR1D2 OS=Pongo pygmaeus (Bornean orangutan) PE=3 SV=1	Olfactory receptor {ECO:0000256|RuleBase:RU000688} (Fragment) OS=Equus caballus (Horse) PE=3 SV=1	PREDICTED: olfactory receptor 11H12-like [Ceratotherium simum simum]
gene20947	--	--	Molecular Function: G-protein coupled receptor activity (GO:0004930);; Molecular Function: olfactory receptor activity (GO:0004984);; Cellular Component: plasma membrane (GO:0005886);; Biological Process: G-protein coupled receptor signaling pathway (GO:0007186);; Cellular Component: integral component of membrane (GO:0016021);; Biological Process: detection of chemical stimulus involved in senso…	K04257|0|umr:103681232|olfactory receptor 51G2-like; K04257 olfactory receptor (A)	--	--	Olfactory receptor 3A1 GN=OR3A1 OS=Gorilla gorilla gorilla (Lowland gorilla) PE=3 SV=1	Olfactory receptor {ECO:0000256|RuleBase:RU000688} OS=Canis familiaris (Dog) PE=3 SV=1	PREDICTED: olfactory receptor 51G2-like [Ursus maritimus]
gene5465	--	--	Molecular Function: G-protein coupled receptor activity (GO:0004930);; Molecular Function: olfactory receptor activity (GO:0004984);; Cellular Component: integral component of membrane (GO:0016021);;	K04257|5.03608e-154|rno:293609|Olr315, ratchr1-201007958-201008890_ORF; olfactory receptor 315; K04257 olfactory receptor (A)	--	--	Olfactory receptor 1G1 GN=OR1G1 OS=Gorilla gorilla gorilla (Lowland gorilla) PE=3 SV=1	Olfactory receptor {ECO:0000256|RuleBase:RU000688} OS=Tupaia chinensis (Chinese tree shrew) PE=3 SV=1	Olfactory receptor 13A1 [Tupaia chinensis]
gene25973	--	--	--	K04257|8.6066e-156|pps:100979352|olfactory receptor 14A16; K04257 olfactory receptor (A)	--	--	Olfactory receptor 1G1 GN=OR1G1 OS=Gorilla gorilla gorilla (Lowland gorilla) PE=3 SV=1	Olfactory receptor {ECO:0000256|RuleBase:RU000688} OS=Gorilla gorilla gorilla (Lowland gorilla) PE=3 SV=1	PREDICTED: olfactory receptor 14A16-like [Erinaceus europaeus]
gene1335	--	--	Molecular Function: G-protein coupled receptor activity (GO:0004930);; Molecular Function: olfactory receptor activity (GO:0004984);; Cellular Component: plasma membrane (GO:0005886);; Cellular Component: integral component of membrane (GO:0016021);;	K04257|0|cge:100770729|olfactory receptor 2W3-like; K04257 olfactory receptor (A)	--	--	Olfactory receptor-like protein OLF3 OS=Canis familiaris (Dog) PE=3 SV=1	Olfactory receptor {ECO:0000256|RuleBase:RU000688} (Fragment) OS=Ovis aries (Sheep) PE=3 SV=1	PREDICTED: olfactory receptor 2W3-like [Elephantulus edwardii]
gene23979	--	--	Molecular Function: G-protein coupled receptor activity (GO:0004930);; Molecular Function: olfactory receptor activity (GO:0004984);; Cellular Component: plasma membrane (GO:0005886);; Biological Process: G-protein coupled receptor signaling pathway (GO:0007186);; Cellular Component: integral component of membrane (GO:0016021);; Biological Process: detection of chemical stimulus involved in senso…	K04257|8.01075e-175|ptg:102965337|olfactory receptor 8B3-like; K04257 olfactory receptor (A)	--	--	Olfactory receptor-like protein OLF1 OS=Canis familiaris (Dog) PE=3 SV=1	Olfactory receptor {ECO:0000256|RuleBase:RU000688} OS=Mustela putorius furo (European domestic ferret) PE=3 SV=1	PREDICTED: olfactory receptor 8B3-like [Mustela putorius furo]
gene24411	--	--	Molecular Function: G-protein coupled receptor activity (GO:0004930);; Molecular Function: olfactory receptor activity (GO:0004984);; Cellular Component: plasma membrane (GO:0005886);; Biological Process: G-protein coupled receptor signaling pathway (GO:0007186);; Cellular Component: integral component of membrane (GO:0016021);; Biological Process: detection of chemical stimulus involved in senso…	K04257|2.13446e-75|ecb:100061862|olfactory receptor 7D4-like; K04257 olfactory receptor (A)	--	--	Olfactory receptor-like protein OLF4 OS=Canis familiaris (Dog) PE=3 SV=1	Olfactory receptor {ECO:0000256|RuleBase:RU000688} OS=Colobus guereza (Mantled guereza) PE=2 SV=1	PREDICTED: olfactory receptor 7D4-like [Camelus bactrianus]
gene24817	--	--	Molecular Function: G-protein coupled receptor activity (GO:0004930);; Molecular Function: olfactory receptor activity (GO:0004984);; Cellular Component: plasma membrane (GO:0005886);; Biological Process: G-protein coupled receptor signaling pathway (GO:0007186);; Cellular Component: integral component of membrane (GO:0016021);; Biological Process: detection of chemical stimulus involved in senso…	K04257|4.01445e-102|rno:295725|Olr455; olfactory receptor 455; K04257 olfactory receptor (A)	--	--	Olfactory receptor-like protein OLF1 OS=Canis familiaris (Dog) PE=3 SV=1	Olfactory receptor {ECO:0000256|RuleBase:RU000688} OS=Ailuropoda melanoleuca (Giant panda) PE=3 SV=1	PREDICTED: olfactory receptor 1013-like [Ursus maritimus]
gene22691	--	--	Molecular Function: G-protein coupled receptor activity (GO:0004930);; Molecular Function: olfactory receptor activity (GO:0004984);; Cellular Component: plasma membrane (GO:0005886);; Biological Process: G-protein coupled receptor signaling pathway (GO:0007186);; Cellular Component: integral component of membrane (GO:0016021);; Biological Process: detection of chemical stimulus involved in senso…	K04257|6.6943e-156|tup:102491777|olfactory receptor 2AT4-like; K04257 olfactory receptor (A)	--	--	Olfactory receptor 3A3 GN=OR3A3 OS=Pan troglodytes (Chimpanzee) PE=3 SV=1	Olfactory receptor {ECO:0000256|RuleBase:RU000688} OS=Tupaia chinensis (Chinese tree shrew) PE=3 SV=1	PREDICTED: olfactory receptor 2AT4-like [Tupaia chinensis]
gene11172	--	--	Molecular Function: G-protein coupled receptor activity (GO:0004930);; Molecular Function: olfactory receptor activity (GO:0004984);; Biological Process: G-protein coupled receptor signaling pathway (GO:0007186);; Cellular Component: integral component of membrane (GO:0016021);; Biological Process: detection of chemical stimulus involved in sensory perception of smell (GO:0050911);;	K04257|4.53836e-118|aml:100473147|olfactory receptor 2T2-like; K04257 olfactory receptor (A)	--	--	Olfactory receptor-like protein OLF2 OS=Canis familiaris (Dog) PE=3 SV=1	Olfactory receptor {ECO:0000256|RuleBase:RU000688} (Fragment) OS=Loxodonta africana (African elephant) PE=3 SV=1	PREDICTED: olfactory receptor 56-like [Erinaceus europaeus]
gene26504	--	--	Molecular Function: G-protein coupled receptor activity (GO:0004930);; Molecular Function: olfactory receptor activity (GO:0004984);; Cellular Component: plasma membrane (GO:0005886);; Biological Process: G-protein coupled receptor signaling pathway (GO:0007186);; Cellular Component: integral component of membrane (GO:0016021);; Biological Process: detection of chemical stimulus involved in senso…	K04257|9.36015e-178|bta:522775|olfactory receptor 8J2; K04257 olfactory receptor (A)	--	--	Olfactory receptor-like protein OLF1 OS=Canis familiaris (Dog) PE=3 SV=1	Olfactory receptor {ECO:0000256|RuleBase:RU000688} OS=Bos taurus (Bovine) PE=3 SV=2	PREDICTED: olfactory receptor 8J2-like [Echinops telfairi]
gene10496	--	--	Molecular Function: G-protein coupled receptor activity (GO:0004930);; Molecular Function: olfactory receptor activity (GO:0004984);; Cellular Component: plasma membrane (GO:0005886);; Biological Process: G-protein coupled receptor signaling pathway (GO:0007186);; Cellular Component: integral component of membrane (GO:0016021);; Biological Process: detection of chemical stimulus involved in senso…	K04257|3.74015e-168|ptg:102966622|olfactory receptor 5AC1-like; K04257 olfactory receptor (A)	--	--	Olfactory receptor-like protein OLF1 OS=Canis familiaris (Dog) PE=3 SV=1	Olfactory receptor {ECO:0000256|RuleBase:RU000688} OS=Loxodonta africana (African elephant) PE=3 SV=1	PREDICTED: olfactory receptor 5AC1-like [Panthera tigris altaica]
gene23722	--	--	Molecular Function: G-protein coupled receptor activity (GO:0004930);; Molecular Function: olfactory receptor activity (GO:0004984);; Cellular Component: plasma membrane (GO:0005886);; Biological Process: G-protein coupled receptor signaling pathway (GO:0007186);; Cellular Component: integral component of membrane (GO:0016021);; Biological Process: detection of chemical stimulus involved in senso…	K04257|1.19731e-158|umr:103676329|olfactory receptor 7G2-like; K04257 olfactory receptor (A)	--	--	Olfactory receptor-like protein OLF4 OS=Canis familiaris (Dog) PE=3 SV=1	Olfactory receptor {ECO:0000256|RuleBase:RU000688} OS=Mustela putorius furo (European domestic ferret) PE=3 SV=1	PREDICTED: olfactory receptor 7G2-like [Ursus maritimus]
gene9389	--	--	Molecular Function: G-protein coupled receptor activity (GO:0004930);; Molecular Function: olfactory receptor activity (GO:0004984);; Cellular Component: plasma membrane (GO:0005886);; Biological Process: G-protein coupled receptor signaling pathway (GO:0007186);; Cellular Component: integral component of membrane (GO:0016021);; Biological Process: detection of chemical stimulus involved in senso…	K04257|1.60093e-177|umr:103656328|olfactory receptor 2T29-like; K04257 olfactory receptor (A)	--	--	Olfactory receptor-like protein OLF1 OS=Canis familiaris (Dog) PE=3 SV=1	Olfactory receptor {ECO:0000256|RuleBase:RU000688} OS=Canis familiaris (Dog) PE=3 SV=2	PREDICTED: olfactory receptor 2T29-like [Ursus maritimus]
gene22605	--	--	Molecular Function: transmembrane signaling receptor activity (GO:0004888);; Biological Process: signal transduction (GO:0007165);; Biological Process: sensory perception of smell (GO:0007608);; Cellular Component: membrane (GO:0016020);;	K04257|1.95847e-98|ecb:100058467|olfactory receptor 10C1-like; K04257 olfactory receptor (A)	--	--	Olfactory receptor-like protein DTMT OS=Canis familiaris (Dog) PE=3 SV=1	Olfactory receptor {ECO:0000256|RuleBase:RU000688} (Fragment) OS=Otolemur garnettii (Small-eared galago) PE=3 SV=1	PREDICTED: olfactory receptor 10C1-like [Ceratotherium simum simum]
gene16149	--	--	Molecular Function: G-protein coupled receptor activity (GO:0004930);; Molecular Function: olfactory receptor activity (GO:0004984);; Cellular Component: plasma membrane (GO:0005886);; Biological Process: G-protein coupled receptor signaling pathway (GO:0007186);; Cellular Component: integral component of membrane (GO:0016021);; Biological Process: detection of chemical stimulus involved in senso…	K04257|0|tup:102491321|olfactory receptor 10J4-like; K04257 olfactory receptor (A)	--	--	Olfactory receptor-like protein OLF3 OS=Canis familiaris (Dog) PE=3 SV=1	Uncharacterized protein {ECO:0000313|Ensembl:ENSMPUP00000019341} OS=Mustela putorius furo (European domestic ferret) PE=4 SV=1	PREDICTED: olfactory receptor 10J4-like [Tupaia chinensis]
gene25773	--	--	--	K04257|0|aml:100477186|olfactory receptor 52N2-like; K04257 olfactory receptor (A)	--	--	Olfactory receptor-like protein OLF3 OS=Canis familiaris (Dog) PE=3 SV=1	Olfactory receptor {ECO:0000256|RuleBase:RU000688} OS=Canis familiaris (Dog) PE=3 SV=2	PREDICTED: olfactory receptor 52N2-like [Mustela putorius furo]
gene25830	--	--	--	K04257|0|umr:103680600|olfactory receptor 6F1-like; K04257 olfactory receptor (A)	--	--	Olfactory receptor 3A2 GN=OR3A2 OS=Gorilla gorilla gorilla (Lowland gorilla) PE=3 SV=1	Olfactory receptor {ECO:0000256|RuleBase:RU000688} OS=Canis familiaris (Dog) PE=3 SV=1	PREDICTED: olfactory receptor 5A2-like [Elephantulus edwardii]
gene7044	--	--	Molecular Function: G-protein coupled receptor activity (GO:0004930);; Molecular Function: olfactory receptor activity (GO:0004984);; Cellular Component: plasma membrane (GO:0005886);; Cellular Component: integral component of membrane (GO:0016021);;	--	--	--	Olfactory receptor 1A1 GN=OR1A1 OS=Pan troglodytes (Chimpanzee) PE=3 SV=1	Olfactory receptor {ECO:0000256|RuleBase:RU000688} (Fragment) OS=Bos taurus (Bovine) PE=3 SV=1	PREDICTED: olfactory receptor 6C2-like [Canis lupus familiaris]
gene23810	--	--	Molecular Function: G-protein coupled receptor activity (GO:0004930);; Molecular Function: olfactory receptor activity (GO:0004984);; Cellular Component: plasma membrane (GO:0005886);; Biological Process: G-protein coupled receptor signaling pathway (GO:0007186);; Cellular Component: integral component of membrane (GO:0016021);; Biological Process: detection of chemical stimulus involved in senso…	K04257|5.74809e-159|tup:102475311|putative olfactory receptor 10AC1-like; K04257 olfactory receptor (A)	--	--	Olfactory receptor 1E1 GN=OR1E1 OS=Pan troglodytes (Chimpanzee) PE=3 SV=1	Olfactory receptor {ECO:0000256|RuleBase:RU000688} OS=Tupaia chinensis (Chinese tree shrew) PE=3 SV=1	PREDICTED: putative olfactory receptor 10AC1-like [Tupaia chinensis]
gene143	--	--	Molecular Function: G-protein coupled receptor activity (GO:0004930);; Molecular Function: olfactory receptor activity (GO:0004984);; Cellular Component: plasma membrane (GO:0005886);; Biological Process: G-protein coupled receptor signaling pathway (GO:0007186);; Cellular Component: integral component of membrane (GO:0016021);; Biological Process: detection of chemical stimulus involved in senso…	K04257|3.19081e-94|tup:102497753|olfactory receptor 2S2-like; K04257 olfactory receptor (A)	--	--	Olfactory receptor-like protein OLF2 OS=Canis familiaris (Dog) PE=3 SV=1	Olfactory receptor 2S2 {ECO:0000313|EMBL:ELW70321.1} OS=Tupaia chinensis (Chinese tree shrew) PE=3 SV=1	PREDICTED: olfactory receptor 2S2-like [Mustela putorius furo]
gene13498	--	--	--	K04257|5.09806e-119|pon:100450398|olfactory receptor 14I1-like; K04257 olfactory receptor (A)	--	--	Olfactory receptor 1G1 GN=OR1G1 OS=Gorilla gorilla gorilla (Lowland gorilla) PE=3 SV=1	Olfactory receptor {ECO:0000256|RuleBase:RU000688} OS=Sarcophilus harrisii (Tasmanian devil) PE=3 SV=1	PREDICTED: olfactory receptor 14I1-like [Dasypus novemcinctus]
gene7004	--	--	Molecular Function: G-protein coupled receptor activity (GO:0004930);; Molecular Function: olfactory receptor activity (GO:0004984);; Cellular Component: plasma membrane (GO:0005886);; Biological Process: G-protein coupled receptor signaling pathway (GO:0007186);; Cellular Component: integral component of membrane (GO:0016021);; Biological Process: detection of chemical stimulus involved in senso…	K04257|0|cge:100760796|olfactory receptor 1030; K04257 olfactory receptor (A)	--	--	Olfactory receptor-like protein OLF1 OS=Canis familiaris (Dog) PE=3 SV=1	Olfactory receptor {ECO:0000256|RuleBase:RU000688} (Fragment) OS=Otolemur garnettii (Small-eared galago) PE=3 SV=1	PREDICTED: olfactory receptor 1030-like [Chrysochloris asiatica]
gene2365	--	--	Molecular Function: G-protein coupled receptor activity (GO:0004930);; Molecular Function: olfactory receptor activity (GO:0004984);; Cellular Component: plasma membrane (GO:0005886);; Biological Process: G-protein coupled receptor signaling pathway (GO:0007186);; Cellular Component: integral component of membrane (GO:0016021);; Biological Process: detection of chemical stimulus involved in senso…	K04257|1.72549e-178|ptg:102968405|olfactory receptor 9A4-like; K04257 olfactory receptor (A)	--	--	Olfactory receptor 1G1 GN=OR1G1 OS=Gorilla gorilla gorilla (Lowland gorilla) PE=3 SV=1	Olfactory receptor {ECO:0000256|RuleBase:RU000688} OS=Mustela putorius furo (European domestic ferret) PE=3 SV=1	PREDICTED: olfactory receptor 9A4-like [Mustela putorius furo]
gene20423	--	--	Molecular Function: G-protein coupled receptor activity (GO:0004930);; Molecular Function: olfactory receptor activity (GO:0004984);; Cellular Component: plasma membrane (GO:0005886);; Biological Process: G-protein coupled receptor signaling pathway (GO:0007186);; Cellular Component: integral component of membrane (GO:0016021);; Biological Process: detection of chemical stimulus involved in senso…	K04257|1.7181e-138|ssc:100518535|olfactory receptor 9G1-like; K04257 olfactory receptor (A)	--	--	Olfactory receptor-like protein OLF1 OS=Canis familiaris (Dog) PE=3 SV=1	Uncharacterized protein {ECO:0000313|Ensembl:ENSSSCP00000014028} OS=Sus scrofa (Pig) PE=4 SV=1	PREDICTED: olfactory receptor 9G1-like [Sus scrofa]
gene11097	--	--	Molecular Function: G-protein coupled receptor activity (GO:0004930);; Molecular Function: olfactory receptor activity (GO:0004984);; Cellular Component: plasma membrane (GO:0005886);; Biological Process: G-protein coupled receptor signaling pathway (GO:0007186);; Cellular Component: integral component of membrane (GO:0016021);; Biological Process: detection of chemical stimulus involved in senso…	K04257|1.1096e-150|ocu:100347873|olfactory receptor 51D1; K04257 olfactory receptor (A)	--	--	Olfactory receptor-like protein OLF2 OS=Canis familiaris (Dog) PE=3 SV=1	Olfactory receptor {ECO:0000256|RuleBase:RU000688} OS=Oryctolagus cuniculus (Rabbit) PE=3 SV=1	PREDICTED: olfactory receptor 51D1 [Oryctolagus cuniculus]
gene19838	--	--	Molecular Function: G-protein coupled receptor activity (GO:0004930);; Molecular Function: olfactory receptor activity (GO:0004984);; Cellular Component: plasma membrane (GO:0005886);; Biological Process: G-protein coupled receptor signaling pathway (GO:0007186);; Cellular Component: integral component of membrane (GO:0016021);; Biological Process: detection of chemical stimulus involved in senso…	K04257|2.7745e-139|bta:100299686|olfactory receptor 5AN1; K04257 olfactory receptor (A)	--	--	Olfactory receptor-like protein OLF1 OS=Canis familiaris (Dog) PE=3 SV=1	Olfactory receptor {ECO:0000256|RuleBase:RU000688} OS=Bos taurus (Bovine) PE=3 SV=2	PREDICTED: olfactory receptor 5AN1-like [Vicugna pacos]
gene25427	--	--	Molecular Function: G-protein coupled receptor activity (GO:0004930);; Molecular Function: olfactory receptor activity (GO:0004984);; Cellular Component: plasma membrane (GO:0005886);; Biological Process: G-protein coupled receptor signaling pathway (GO:0007186);; Cellular Component: integral component of membrane (GO:0016021);; Biological Process: detection of chemical stimulus involved in senso…	K04257|2.16287e-60|bacu:103011083|olfactory receptor 2A2-like; K04257 olfactory receptor (A)	--	--	Olfactory receptor-like protein OLF3 OS=Canis familiaris (Dog) PE=3 SV=1	Olfactory receptor 2A5 {ECO:0000313|EMBL:ELK19535.1} OS=Pteropus alecto (Black flying fox) PE=4 SV=1	Olfactory receptor 2A5 [Pteropus alecto]
gene20951	--	--	Molecular Function: G-protein coupled receptor activity (GO:0004930);; Molecular Function: olfactory receptor activity (GO:0004984);; Cellular Component: plasma membrane (GO:0005886);; Cellular Component: integral component of membrane (GO:0016021);;	K04257|3.024e-152|ecb:100058198|olfactory receptor 8S1-like; K04257 olfactory receptor (A)	--	--	Olfactory receptor-like protein DTMT OS=Canis familiaris (Dog) PE=3 SV=1	Olfactory receptor {ECO:0000256|RuleBase:RU000688} OS=Equus caballus (Horse) PE=3 SV=1	PREDICTED: olfactory receptor 8S1-like [Ceratotherium simum simum]
gene13704	--	--	Molecular Function: G-protein coupled receptor activity (GO:0004930);; Molecular Function: olfactory receptor activity (GO:0004984);; Cellular Component: plasma membrane (GO:0005886);; Biological Process: G-protein coupled receptor signaling pathway (GO:0007186);; Cellular Component: integral component of membrane (GO:0016021);; Biological Process: detection of chemical stimulus involved in senso…	K04257|9.04617e-180|umr:103682037|olfactory receptor 9K2-like; K04257 olfactory receptor (A)	--	--	Olfactory receptor-like protein OLF1 OS=Canis familiaris (Dog) PE=3 SV=1	Olfactory receptor {ECO:0000256|RuleBase:RU000688} OS=Sus scrofa (Pig) PE=3 SV=1	PREDICTED: olfactory receptor 9K2-like [Ursus maritimus]
gene12606	--	--	Molecular Function: G-protein coupled receptor activity (GO:0004930);; Molecular Function: olfactory receptor activity (GO:0004984);; Cellular Component: plasma membrane (GO:0005886);; Biological Process: G-protein coupled receptor signaling pathway (GO:0007186);; Cellular Component: integral component of membrane (GO:0016021);; Biological Process: detection of chemical stimulus involved in senso…	K04257|0|pale:102891302|olfactory receptor 52B2-like; K04257 olfactory receptor (A)	--	--	Olfactory receptor 1E5 GN=OR1E5 OS=Pan troglodytes (Chimpanzee) PE=3 SV=1	Olfactory receptor {ECO:0000256|RuleBase:RU000688} OS=Pteropus alecto (Black flying fox) PE=3 SV=1	PREDICTED: olfactory receptor 52B2-like [Pteropus alecto]
gene13399	--	--	--	K04257|3.05424e-147|ecb:100065637|olfactory receptor 14C36-like; K04257 olfactory receptor (A)	--	--	Olfactory receptor 1G1 GN=OR1G1 OS=Gorilla gorilla gorilla (Lowland gorilla) PE=3 SV=1	Olfactory receptor 14C36-like protein {ECO:0000313|EMBL:EPY85959.1} OS=Camelus ferus (Wild Bactrian camel) PE=4 SV=1	PREDICTED: olfactory receptor 14C36-like [Condylura cristata]
gene15305	--	--	Molecular Function: G-protein coupled receptor activity (GO:0004930);; Molecular Function: olfactory receptor activity (GO:0004984);; Cellular Component: plasma membrane (GO:0005886);; Biological Process: G-protein coupled receptor signaling pathway (GO:0007186);; Cellular Component: integral component of membrane (GO:0016021);; Biological Process: detection of chemical stimulus involved in senso…	K04257|1.60673e-178|pale:102885849|olfactory receptor 6S1-like; K04257 olfactory receptor (A)	--	--	Olfactory receptor 1E1 GN=OR1E1 OS=Pan troglodytes (Chimpanzee) PE=3 SV=1	Olfactory receptor {ECO:0000256|RuleBase:RU000688} OS=Pteropus alecto (Black flying fox) PE=3 SV=1	PREDICTED: olfactory receptor 6S1 [Equus przewalskii]
gene8549	--	--	Molecular Function: G-protein coupled receptor activity (GO:0004930);; Molecular Function: olfactory receptor activity (GO:0004984);; Cellular Component: plasma membrane (GO:0005886);; Biological Process: G-protein coupled receptor signaling pathway (GO:0007186);; Cellular Component: integral component of membrane (GO:0016021);; Biological Process: detection of chemical stimulus involved in senso…	K04257|0|umr:103666090|olfactory receptor 5M11; K04257 olfactory receptor (A)	--	--	Olfactory receptor-like protein OLF2 OS=Canis familiaris (Dog) PE=3 SV=1	Olfactory receptor {ECO:0000256|RuleBase:RU000688} OS=Ailuropoda melanoleuca (Giant panda) PE=3 SV=1	PREDICTED: olfactory receptor 5M11 [Ursus maritimus]
gene15011	--	--	Molecular Function: G-protein coupled receptor activity (GO:0004930);; Molecular Function: olfactory receptor activity (GO:0004984);; Cellular Component: plasma membrane (GO:0005886);; Biological Process: G-protein coupled receptor signaling pathway (GO:0007186);; Cellular Component: integral component of membrane (GO:0016021);; Biological Process: detection of chemical stimulus involved in senso…	K04257|0|myb:102261875|olfactory receptor 4F21-like; K04257 olfactory receptor (A)	--	--	Olfactory receptor 1A1 GN=OR1A1 OS=Pan troglodytes (Chimpanzee) PE=3 SV=1	Olfactory receptor {ECO:0000256|RuleBase:RU000688} OS=Ailuropoda melanoleuca (Giant panda) PE=3 SV=1	PREDICTED: putative olfactory receptor GPCRLTM7 [Eptesicus fuscus]
gene11474	--	--	--	K04257|1.04823e-129|cfr:102513226|olfactory receptor 14C36-like; K04257 olfactory receptor (A)	--	--	Olfactory receptor-like protein OLF1 OS=Canis familiaris (Dog) PE=3 SV=1	Olfactory receptor 14C36-like protein {ECO:0000313|EMBL:EPY85959.1} OS=Camelus ferus (Wild Bactrian camel) PE=4 SV=1	PREDICTED: olfactory receptor 14C36-like [Erinaceus europaeus]
gene10573	--	--	Molecular Function: G-protein coupled receptor activity (GO:0004930);; Molecular Function: olfactory receptor activity (GO:0004984);; Cellular Component: plasma membrane (GO:0005886);; Biological Process: G-protein coupled receptor signaling pathway (GO:0007186);; Cellular Component: integral component of membrane (GO:0016021);; Biological Process: detection of chemical stimulus involved in senso…	K04257|0|fca:101088672|olfactory receptor 11H6-like; K04257 olfactory receptor (A)	--	--	Olfactory receptor 1D2 GN=OR1D2 OS=Pongo pygmaeus (Bornean orangutan) PE=3 SV=1	Olfactory receptor {ECO:0000256|RuleBase:RU000688} OS=Felis catus (Cat) PE=3 SV=1	PREDICTED: olfactory receptor 11H6-like [Mustela putorius furo]
gene21212	--	--	Molecular Function: G-protein coupled receptor activity (GO:0004930);; Molecular Function: olfactory receptor activity (GO:0004984);; Cellular Component: plasma membrane (GO:0005886);; Biological Process: G-protein coupled receptor signaling pathway (GO:0007186);; Cellular Component: integral component of membrane (GO:0016021);; Biological Process: detection of chemical stimulus involved in senso…	K04257|9.48106e-173|umr:103666067|olfactory receptor 8H1-like; K04257 olfactory receptor (A)	--	--	Olfactory receptor-like protein OLF2 OS=Canis familiaris (Dog) PE=3 SV=1	Olfactory receptor {ECO:0000256|RuleBase:RU000688} (Fragment) OS=Ailuropoda melanoleuca (Giant panda) PE=3 SV=1	PREDICTED: olfactory receptor 8H1-like [Ursus maritimus]
gene9419	--	--	Molecular Function: G-protein coupled receptor activity (GO:0004930);; Molecular Function: olfactory receptor activity (GO:0004984);; Cellular Component: plasma membrane (GO:0005886);; Cellular Component: integral component of membrane (GO:0016021);;	K04257|2.83553e-162|pale:102879787|olfactory receptor 6C1-like; K04257 olfactory receptor (A)	--	--	Olfactory receptor 3A3 GN=OR3A3 OS=Pan troglodytes (Chimpanzee) PE=3 SV=1	Olfactory receptor {ECO:0000256|RuleBase:RU000688} OS=Myotis lucifugus (Little brown bat) PE=3 SV=1	PREDICTED: olfactory receptor 6C1 [Eptesicus fuscus]
gene26958	--	--	Molecular Function: G-protein coupled receptor activity (GO:0004930);; Molecular Function: olfactory receptor activity (GO:0004984);; Cellular Component: plasma membrane (GO:0005886);; Biological Process: G-protein coupled receptor signaling pathway (GO:0007186);; Cellular Component: integral component of membrane (GO:0016021);; Biological Process: detection of chemical stimulus involved in senso…	K04257|6.9838e-180|ecb:100057888|olfactory receptor 12D3-like; K04257 olfactory receptor (A)	--	--	Olfactory receptor 1E2 GN=OR1E2 OS=Pan troglodytes (Chimpanzee) PE=3 SV=1	Olfactory receptor {ECO:0000256|RuleBase:RU000688} OS=Macaca fascicularis (Crab-eating macaque) PE=3 SV=1	PREDICTED: olfactory receptor 12D3-like [Equus caballus]
gene10154	--	--	Molecular Function: G-protein coupled receptor activity (GO:0004930);; Molecular Function: olfactory receptor activity (GO:0004984);; Cellular Component: plasma membrane (GO:0005886);; Biological Process: G-protein coupled receptor signaling pathway (GO:0007186);; Cellular Component: integral component of membrane (GO:0016021);; Biological Process: detection of chemical stimulus involved in senso…	K04257|2.31105e-175|cfa:483603|cOR4C43; cOR4C43 olfactory receptor family 4 subfamily C-like; K04257 olfactory receptor (A)	--	--	Olfactory receptor-like protein OLF1 OS=Canis familiaris (Dog) PE=3 SV=1	Olfactory receptor {ECO:0000256|RuleBase:RU000688} OS=Canis familiaris (Dog) PE=3 SV=1	PREDICTED: olfactory receptor 4C46 [Canis lupus familiaris]
gene15449	--	--	Molecular Function: G-protein coupled receptor activity (GO:0004930);; Molecular Function: olfactory receptor activity (GO:0004984);; Cellular Component: plasma membrane (GO:0005886);; Biological Process: G-protein coupled receptor signaling pathway (GO:0007186);; Cellular Component: integral component of membrane (GO:0016021);; Biological Process: detection of chemical stimulus involved in senso…	K04257|7.07234e-168|tup:102490948|olfactory receptor 2AT4-like; K04257 olfactory receptor (A)	--	--	Olfactory receptor 3A3 GN=OR3A3 OS=Pan troglodytes (Chimpanzee) PE=3 SV=1	Olfactory receptor {ECO:0000256|RuleBase:RU000688} OS=Tupaia chinensis (Chinese tree shrew) PE=3 SV=1	PREDICTED: olfactory receptor 2AT4-like [Tupaia chinensis]
gene5546	--	--	Molecular Function: G-protein coupled receptor activity (GO:0004930);; Molecular Function: olfactory receptor activity (GO:0004984);; Cellular Component: plasma membrane (GO:0005886);; Biological Process: G-protein coupled receptor signaling pathway (GO:0007186);; Cellular Component: integral component of membrane (GO:0016021);; Biological Process: detection of chemical stimulus involved in senso…	K04257|0|cfa:485267|cOR51K1P; cOR51K1P olfactory receptor family 51 subfamily K-like; K04257 olfactory receptor (A)	--	--	Olfactory receptor 1E1 GN=OR1E1 OS=Pan troglodytes (Chimpanzee) PE=3 SV=1	Olfactory receptor {ECO:0000256|RuleBase:RU000688} (Fragment) OS=Canis familiaris (Dog) PE=3 SV=2	PREDICTED: olfactory receptor 51I2 [Canis lupus familiaris]
gene25817	--	--	--	K04257|0|ssc:100525331|olfactory receptor 1044-like; K04257 olfactory receptor (A)	--	--	Olfactory receptor-like protein OLF2 OS=Canis familiaris (Dog) PE=3 SV=1	Olfactory receptor {ECO:0000256|RuleBase:RU000688} OS=Canis familiaris (Dog) PE=3 SV=2	PREDICTED: olfactory receptor 8U9 [Eptesicus fuscus]
gene1982	--	--	Molecular Function: G-protein coupled receptor activity (GO:0004930);; Molecular Function: olfactory receptor activity (GO:0004984);; Cellular Component: plasma membrane (GO:0005886);; Cellular Component: integral component of membrane (GO:0016021);;	K04257|1.15487e-154|cfr:102513226|olfactory receptor 14C36-like; K04257 olfactory receptor (A)	--	--	Olfactory receptor-like protein OLF1 OS=Canis familiaris (Dog) PE=3 SV=1	Olfactory receptor 14C36-like protein {ECO:0000313|EMBL:EPY85959.1} OS=Camelus ferus (Wild Bactrian camel) PE=4 SV=1	PREDICTED: olfactory receptor 14C36-like [Camelus dromedarius]
gene8324	--	--	Molecular Function: G-protein coupled receptor activity (GO:0004930);; Molecular Function: olfactory receptor activity (GO:0004984);; Cellular Component: plasma membrane (GO:0005886);; Cellular Component: integral component of membrane (GO:0016021);;	K04257|1.8341e-139|cfa:488613|OR6Y1; olfactory receptor, family 6, subfamily Y, member 1; K04257 olfactory receptor (A)	--	--	Olfactory receptor-like protein OLF1 OS=Canis familiaris (Dog) PE=3 SV=1	Olfactory receptor {ECO:0000256|RuleBase:RU000688} OS=Bos taurus (Bovine) PE=3 SV=2	PREDICTED: olfactory receptor 6Y1-like [Trichechus manatus latirostris]
gene574	--	--	Molecular Function: G-protein coupled receptor activity (GO:0004930);; Molecular Function: olfactory receptor activity (GO:0004984);; Cellular Component: plasma membrane (GO:0005886);; Biological Process: G-protein coupled receptor signaling pathway (GO:0007186);; Cellular Component: integral component of membrane (GO:0016021);; Biological Process: detection of chemical stimulus involved in senso…	K04257|3.71233e-173|ssc:100156296|olfactory receptor 6C6-like; K04257 olfactory receptor (A)	--	--	Olfactory receptor-like protein OLF3 OS=Canis familiaris (Dog) PE=3 SV=1	Olfactory receptor {ECO:0000256|RuleBase:RU000688} OS=Otolemur garnettii (Small-eared galago) PE=3 SV=1	PREDICTED: olfactory receptor 6C6-like [Sus scrofa]
gene21852	--	--	--	K04257|1.87516e-123|mcf:102136769|olfactory receptor 14I1-like; K04257 olfactory receptor (A)	--	--	Olfactory receptor 1E1 GN=OR1E1 OS=Pan troglodytes (Chimpanzee) PE=3 SV=1	Olfactory receptor {ECO:0000256|RuleBase:RU000688} OS=Sarcophilus harrisii (Tasmanian devil) PE=3 SV=1	PREDICTED: olfactory receptor 14I1-like [Dasypus novemcinctus]
gene14092	--	--	Molecular Function: G-protein coupled receptor activity (GO:0004930);; Molecular Function: olfactory receptor activity (GO:0004984);; Cellular Component: plasma membrane (GO:0005886);; Biological Process: G-protein coupled receptor signaling pathway (GO:0007186);; Cellular Component: integral component of membrane (GO:0016021);; Biological Process: detection of chemical stimulus involved in senso…	K04257|1.98797e-140|myb:102244897|olfactory receptor 52J3-like; K04257 olfactory receptor (A)	--	--	Olfactory receptor 1D2 GN=OR1D2 OS=Gorilla gorilla gorilla (Lowland gorilla) PE=3 SV=1	Olfactory receptor {ECO:0000256|RuleBase:RU000688} OS=Myotis davidii (David's myotis) PE=3 SV=1	Olfactory receptor 52J3 [Myotis davidii]
gene11846	--	--	--	K04257|0|tup:102487951|olfactory receptor 4K13-like; K04257 olfactory receptor (A)	--	--	Olfactory receptor-like protein DTMT OS=Canis familiaris (Dog) PE=3 SV=1	Olfactory receptor {ECO:0000256|RuleBase:RU000688} OS=Camelus ferus (Wild Bactrian camel) PE=3 SV=1	PREDICTED: LOW QUALITY PROTEIN: olfactory receptor 4K13-like [Camelus bactrianus]
gene26204	--	--	Molecular Function: G-protein coupled receptor activity (GO:0004930);; Molecular Function: olfactory receptor activity (GO:0004984);; Cellular Component: plasma membrane (GO:0005886);; Biological Process: G-protein coupled receptor signaling pathway (GO:0007186);; Cellular Component: integral component of membrane (GO:0016021);; Biological Process: detection of chemical stimulus involved in senso…	K04257|0|umr:103678001|olfactory receptor 52B4-like; K04257 olfactory receptor (A)	--	--	Olfactory receptor-like protein OLF3 OS=Canis familiaris (Dog) PE=3 SV=1	Olfactory receptor {ECO:0000256|RuleBase:RU000688} (Fragment) OS=Ailuropoda melanoleuca (Giant panda) PE=3 SV=1	PREDICTED: olfactory receptor 52B4-like [Mustela putorius furo]
gene23421	--	--	Molecular Function: transmembrane signaling receptor activity (GO:0004888);; Biological Process: signal transduction (GO:0007165);; Cellular Component: membrane (GO:0016020);;	K04257|1.63912e-117|aml:100473147|olfactory receptor 2T2-like; K04257 olfactory receptor (A)	--	--	Olfactory receptor 1G1 GN=OR1G1 OS=Gorilla gorilla gorilla (Lowland gorilla) PE=3 SV=1	Olfactory receptor {ECO:0000256|RuleBase:RU000688} (Fragment) OS=Loxodonta africana (African elephant) PE=3 SV=1	PREDICTED: olfactory receptor 2T27-like [Echinops telfairi]
gene15746	--	--	Molecular Function: G-protein coupled receptor activity (GO:0004930);; Molecular Function: olfactory receptor activity (GO:0004984);; Cellular Component: plasma membrane (GO:0005886);; Cellular Component: integral component of membrane (GO:0016021);;	K04257|3.39266e-82|bom:102267905|olfactory receptor 8S1-like; K04257 olfactory receptor (A)	--	--	Olfactory receptor 3A2 GN=OR3A2 OS=Pan troglodytes (Chimpanzee) PE=3 SV=1	Olfactory receptor {ECO:0000256|RuleBase:RU000688} OS=Bos taurus (Bovine) PE=3 SV=2	PREDICTED: olfactory receptor 8S1-like [Ceratotherium simum simum]
gene15493	--	--	Molecular Function: G-protein coupled receptor activity (GO:0004930);; Molecular Function: olfactory receptor activity (GO:0004984);; Cellular Component: plasma membrane (GO:0005886);; Biological Process: G-protein coupled receptor signaling pathway (GO:0007186);; Cellular Component: integral component of membrane (GO:0016021);; Biological Process: detection of chemical stimulus involved in senso…	K04257|0|pale:102897322|olfactory receptor 1030-like; K04257 olfactory receptor (A)	--	--	Olfactory receptor-like protein OLF2 OS=Canis familiaris (Dog) PE=3 SV=1	Olfactory receptor {ECO:0000256|RuleBase:RU000688} OS=Monodelphis domestica (Gray short-tailed opossum) PE=3 SV=1	PREDICTED: olfactory receptor 1030-like [Condylura cristata]
gene12655	--	--	Molecular Function: G-protein coupled receptor activity (GO:0004930);; Molecular Function: olfactory receptor activity (GO:0004984);; Cellular Component: plasma membrane (GO:0005886);; Biological Process: G-protein coupled receptor signaling pathway (GO:0007186);; Cellular Component: integral component of membrane (GO:0016021);; Biological Process: detection of chemical stimulus involved in senso…	K04257|4.09267e-178|cfa:491627|olfactory receptor 51I2-like; K04257 olfactory receptor (A)	--	--	Olfactory receptor 1A1 GN=OR1A1 OS=Pan troglodytes (Chimpanzee) PE=3 SV=1	Olfactory receptor {ECO:0000256|RuleBase:RU000688} OS=Felis catus (Cat) PE=3 SV=1	PREDICTED: olfactory receptor 51I2-like [Canis lupus familiaris]
gene26351	--	--	Molecular Function: G-protein coupled receptor activity (GO:0004930);; Molecular Function: olfactory receptor activity (GO:0004984);; Cellular Component: plasma membrane (GO:0005886);; Cellular Component: integral component of membrane (GO:0016021);;	K04257|0|tup:102493756|olfactory receptor 52N2-like; K04257 olfactory receptor (A)	--	--	Olfactory receptor-like protein OLF3 OS=Canis familiaris (Dog) PE=3 SV=1	Olfactory receptor {ECO:0000256|RuleBase:RU000688} OS=Otolemur garnettii (Small-eared galago) PE=3 SV=1	PREDICTED: olfactory receptor 52N2-like [Ceratotherium simum simum]
gene19658	--	--	Molecular Function: G-protein coupled receptor activity (GO:0004930);; Molecular Function: olfactory receptor activity (GO:0004984);; Cellular Component: plasma membrane (GO:0005886);; Biological Process: G-protein coupled receptor signaling pathway (GO:0007186);; Cellular Component: integral component of membrane (GO:0016021);; Biological Process: detection of chemical stimulus involved in senso…	K04257|1.92685e-169|myb:102252969|olfactory receptor 51A4-like; K04257 olfactory receptor (A)	--	--	Olfactory receptor 1E2 GN=OR1E2 OS=Gorilla gorilla gorilla (Lowland gorilla) PE=3 SV=1	Olfactory receptor {ECO:0000256|RuleBase:RU000688} OS=Myotis lucifugus (Little brown bat) PE=3 SV=1	PREDICTED: olfactory receptor 51A4-like [Myotis lucifugus]
gene16382	--	--	Molecular Function: G-protein coupled receptor activity (GO:0004930);; Molecular Function: olfactory receptor activity (GO:0004984);; Cellular Component: plasma membrane (GO:0005886);; Cellular Component: integral component of membrane (GO:0016021);;	K04257|5.4438e-147|bta:782591|olfactory receptor 6C2; K04257 olfactory receptor (A)	--	--	Olfactory receptor 1E1 GN=OR1E1 OS=Pan troglodytes (Chimpanzee) PE=3 SV=1	Olfactory receptor {ECO:0000256|RuleBase:RU000688} (Fragment) OS=Bos taurus (Bovine) PE=3 SV=1	PREDICTED: olfactory receptor 6C2-like [Bison bison bison]
gene13702	--	--	Molecular Function: G-protein coupled receptor activity (GO:0004930);; Molecular Function: olfactory receptor activity (GO:0004984);; Cellular Component: plasma membrane (GO:0005886);; Biological Process: G-protein coupled receptor signaling pathway (GO:0007186);; Cellular Component: integral component of membrane (GO:0016021);; Biological Process: detection of chemical stimulus involved in senso…	K04257|0|cfr:102512008|olfactory receptor 12-like; K04257 olfactory receptor (A)	--	--	Olfactory receptor-like protein OLF1 OS=Canis familiaris (Dog) PE=3 SV=1	Olfactory receptor {ECO:0000256|RuleBase:RU000688} OS=Camelus ferus (Wild Bactrian camel) PE=3 SV=1	PREDICTED: olfactory receptor 12-like [Camelus bactrianus]
gene19667	--	--	Molecular Function: G-protein coupled receptor activity (GO:0004930);; Molecular Function: olfactory receptor activity (GO:0004984);; Cellular Component: plasma membrane (GO:0005886);; Biological Process: G-protein coupled receptor signaling pathway (GO:0007186);; Cellular Component: integral component of membrane (GO:0016021);; Biological Process: detection of chemical stimulus involved in senso…	K04257|0|tup:102477997|olfactory receptor 51F2-like; K04257 olfactory receptor (A)	--	--	Olfactory receptor 3A1 GN=OR3A1 OS=Gorilla gorilla gorilla (Lowland gorilla) PE=3 SV=1	Olfactory receptor {ECO:0000256|RuleBase:RU000688} (Fragment) OS=Mustela putorius furo (European domestic ferret) PE=3 SV=1	PREDICTED: olfactory receptor 51F2-like [Tupaia chinensis]
gene19697	--	--	Molecular Function: G-protein coupled receptor activity (GO:0004930);; Molecular Function: olfactory receptor activity (GO:0004984);; Cellular Component: plasma membrane (GO:0005886);; Biological Process: G-protein coupled receptor signaling pathway (GO:0007186);; Cellular Component: integral component of membrane (GO:0016021);; Biological Process: detection of chemical stimulus involved in senso…	K04257|0|myd:102755957|putative olfactory receptor 52P1-like; K04257 olfactory receptor (A)	--	--	Olfactory receptor 1E1 GN=OR1E1 OS=Pan troglodytes (Chimpanzee) PE=3 SV=1	Olfactory receptor {ECO:0000256|RuleBase:RU000688} OS=Myotis lucifugus (Little brown bat) PE=3 SV=1	PREDICTED: putative olfactory receptor 52P1-like [Myotis lucifugus]
gene20948	--	--	Molecular Function: G-protein coupled receptor activity (GO:0004930);; Molecular Function: olfactory receptor activity (GO:0004984);; Cellular Component: plasma membrane (GO:0005886);; Biological Process: G-protein coupled receptor signaling pathway (GO:0007186);; Cellular Component: integral component of membrane (GO:0016021);; Biological Process: detection of chemical stimulus involved in senso…	K04257|0|ecb:100068355|putative olfactory receptor 52P1-like; K04257 olfactory receptor (A)	--	--	Olfactory receptor-like protein OLF3 OS=Canis familiaris (Dog) PE=3 SV=1	Olfactory receptor {ECO:0000256|RuleBase:RU000688} OS=Callicebus moloch (Dusky titi monkey) PE=3 SV=1	PREDICTED: putative olfactory receptor 52P1-like [Equus caballus]
gene11792	--	--	Molecular Function: G-protein coupled receptor activity (GO:0004930);; Molecular Function: olfactory receptor activity (GO:0004984);; Cellular Component: plasma membrane (GO:0005886);; Cellular Component: integral component of membrane (GO:0016021);;	K04257|0|myb:102242592|olfactory receptor 2B11-like; K04257 olfactory receptor (A)	--	--	Olfactory receptor-like protein OLF3 OS=Canis familiaris (Dog) PE=3 SV=1	Olfactory receptor {ECO:0000256|RuleBase:RU000688} OS=Myotis lucifugus (Little brown bat) PE=3 SV=1	PREDICTED: olfactory receptor 2B11-like [Myotis brandtii]
gene15234	--	--	Molecular Function: G-protein coupled receptor activity (GO:0004930);; Molecular Function: olfactory receptor activity (GO:0004984);; Cellular Component: plasma membrane (GO:0005886);; Cellular Component: integral component of membrane (GO:0016021);;	K04257|1.02854e-150|cfr:102513226|olfactory receptor 14C36-like; K04257 olfactory receptor (A)	--	--	Olfactory receptor 1G1 GN=OR1G1 OS=Gorilla gorilla gorilla (Lowland gorilla) PE=3 SV=1	Olfactory receptor 14C36-like protein {ECO:0000313|EMBL:EPY85959.1} OS=Camelus ferus (Wild Bactrian camel) PE=4 SV=1	PREDICTED: olfactory receptor 14C36-like [Camelus dromedarius]
gene13270	--	--	Molecular Function: G-protein coupled receptor activity (GO:0004930);; Molecular Function: olfactory receptor activity (GO:0004984);; Cellular Component: plasma membrane (GO:0005886);; Biological Process: G-protein coupled receptor signaling pathway (GO:0007186);; Cellular Component: integral component of membrane (GO:0016021);; Biological Process: detection of chemical stimulus involved in senso…	K04257|2.13429e-151|cfa:100685557|olfactory receptor 13C8-like; K04257 olfactory receptor (A)	--	--	Olfactory receptor-like protein OLF3 OS=Canis familiaris (Dog) PE=3 SV=1	Olfactory receptor {ECO:0000256|RuleBase:RU000688} OS=Mustela putorius furo (European domestic ferret) PE=3 SV=1	PREDICTED: olfactory receptor 13C8 [Eptesicus fuscus]
gene15329	--	--	Molecular Function: G-protein coupled receptor activity (GO:0004930);; Molecular Function: olfactory receptor activity (GO:0004984);; Cellular Component: plasma membrane (GO:0005886);; Biological Process: G-protein coupled receptor signaling pathway (GO:0007186);; Cellular Component: integral component of membrane (GO:0016021);; Biological Process: detection of chemical stimulus involved in senso…	K04257|0|fca:101097169|olfactory receptor 52E4-like; K04257 olfactory receptor (A)	--	--	Olfactory receptor 1E1 GN=OR1E1 OS=Pan troglodytes (Chimpanzee) PE=3 SV=1	Olfactory receptor {ECO:0000256|RuleBase:RU000688} OS=Felis catus (Cat) PE=3 SV=1	PREDICTED: olfactory receptor 52E4-like [Felis catus]
gene7310	--	--	Molecular Function: G-protein coupled receptor activity (GO:0004930);; Molecular Function: olfactory receptor activity (GO:0004984);; Cellular Component: plasma membrane (GO:0005886);; Biological Process: G-protein coupled receptor signaling pathway (GO:0007186);; Cellular Component: integral component of membrane (GO:0016021);; Biological Process: detection of chemical stimulus involved in senso…	K04257|2.66682e-153|oas:101122438|olfactory receptor 2T27-like; K04257 olfactory receptor (A)	--	--	Olfactory receptor-like protein OLF3 OS=Canis familiaris (Dog) PE=3 SV=1	Olfactory receptor {ECO:0000256|RuleBase:RU000688} OS=Bos mutus PE=3 SV=1	PREDICTED: olfactory receptor 2T27-like [Elephantulus edwardii]
gene18951	--	--	Molecular Function: G-protein coupled receptor activity (GO:0004930);; Molecular Function: olfactory receptor activity (GO:0004984);; Cellular Component: plasma membrane (GO:0005886);; Biological Process: G-protein coupled receptor signaling pathway (GO:0007186);; Cellular Component: integral component of membrane (GO:0016021);; Biological Process: detection of chemical stimulus involved in senso…	K04257|0|ptg:102955960|putative olfactory receptor 2B3-like; K04257 olfactory receptor (A)	--	--	Olfactory receptor-like protein OLF1 OS=Canis familiaris (Dog) PE=3 SV=1	Uncharacterized protein {ECO:0000313|Ensembl:ENSFCAP00000016664} OS=Felis catus (Cat) PE=4 SV=1	PREDICTED: putative olfactory receptor 2B3-like [Panthera tigris altaica]
gene15511	--	--	Molecular Function: G-protein coupled receptor activity (GO:0004930);; Molecular Function: olfactory receptor activity (GO:0004984);; Cellular Component: plasma membrane (GO:0005886);; Biological Process: G-protein coupled receptor signaling pathway (GO:0007186);; Cellular Component: integral component of membrane (GO:0016021);; Biological Process: detection of chemical stimulus involved in senso…	K04257|6.23366e-136|ptg:102956857|olfactory receptor 5V1-like; K04257 olfactory receptor (A)	--	--	Olfactory receptor-like protein OLF3 OS=Canis familiaris (Dog) PE=3 SV=1	Olfactory receptor {ECO:0000256|RuleBase:RU000688} (Fragment) OS=Loxodonta africana (African elephant) PE=3 SV=1	PREDICTED: olfactory receptor 5V1-like [Dasypus novemcinctus]
gene4240	--	--	Molecular Function: transmembrane signaling receptor activity (GO:0004888);; Biological Process: signal transduction (GO:0007165);; Biological Process: sensory perception of smell (GO:0007608);; Cellular Component: membrane (GO:0016020);;	K04257|1.19643e-150|aml:100470149|olfactory receptor 2H1-like; K04257 olfactory receptor (A)	--	--	Olfactory receptor-like protein OLF3 OS=Canis familiaris (Dog) PE=3 SV=1	Olfactory receptor {ECO:0000256|RuleBase:RU000688} (Fragment) OS=Ailuropoda melanoleuca (Giant panda) PE=3 SV=1	PREDICTED: olfactory receptor 2H1-like [Condylura cristata]
gene13031	--	--	Molecular Function: G-protein coupled receptor activity (GO:0004930);; Molecular Function: olfactory receptor activity (GO:0004984);; Cellular Component: plasma membrane (GO:0005886);; Biological Process: G-protein coupled receptor signaling pathway (GO:0007186);; Cellular Component: integral component of membrane (GO:0016021);; Biological Process: detection of chemical stimulus involved in senso…	K04257|6.63965e-122|cfr:102510026|olfactory receptor 8A1-like; K04257 olfactory receptor (A)	--	--	Olfactory receptor-like protein DTMT OS=Canis familiaris (Dog) PE=3 SV=1	Olfactory receptor {ECO:0000256|RuleBase:RU000688} OS=Bos taurus (Bovine) PE=3 SV=1	PREDICTED: olfactory receptor 8A1-like [Ceratotherium simum simum]
gene25791	--	--	--	K04257|1.63847e-65|tup:102477284|olfactory receptor 1J4-like; K04257 olfactory receptor (A)	--	--	Olfactory receptor 1D2 GN=OR1D2 OS=Pongo pygmaeus (Bornean orangutan) PE=3 SV=1	Olfactory receptor {ECO:0000256|RuleBase:RU000688} OS=Tupaia chinensis (Chinese tree shrew) PE=3 SV=1	PREDICTED: olfactory receptor 1J4-like [Tupaia chinensis]
gene24821	--	--	Molecular Function: G-protein coupled receptor activity (GO:0004930);; Molecular Function: olfactory receptor activity (GO:0004984);; Cellular Component: plasma membrane (GO:0005886);; Biological Process: G-protein coupled receptor signaling pathway (GO:0007186);; Cellular Component: integral component of membrane (GO:0016021);; Biological Process: detection of chemical stimulus involved in senso…	K04257|0|umr:103670351|olfactory receptor 1N2-like; K04257 olfactory receptor (A)	--	--	Olfactory receptor 1G1 GN=OR1G1 OS=Gorilla gorilla gorilla (Lowland gorilla) PE=3 SV=1	Uncharacterized protein {ECO:0000313|Ensembl:ENSAMEP00000019698} (Fragment) OS=Ailuropoda melanoleuca (Giant panda) PE=4 SV=1	PREDICTED: olfactory receptor 1N2-like [Ursus maritimus]
gene23834	--	--	Molecular Function: transmembrane signaling receptor activity (GO:0004888);; Biological Process: signal transduction (GO:0007165);; Biological Process: sensory perception of smell (GO:0007608);; Cellular Component: membrane (GO:0016020);;	K04257|2.35956e-128|bta:526047|olfactory receptor 12; K04257 olfactory receptor (A)	--	--	Olfactory receptor-like protein OLF2 OS=Canis familiaris (Dog) PE=3 SV=1	Olfactory receptor {ECO:0000256|RuleBase:RU000688} (Fragment) OS=Bos taurus (Bovine) PE=3 SV=1	PREDICTED: olfactory receptor 12 isoform X2 [Bos taurus]
gene21408	--	--	Molecular Function: G-protein coupled receptor activity (GO:0004930);; Molecular Function: olfactory receptor activity (GO:0004984);; Cellular Component: plasma membrane (GO:0005886);; Biological Process: G-protein coupled receptor signaling pathway (GO:0007186);; Cellular Component: integral component of membrane (GO:0016021);; Biological Process: detection of chemical stimulus involved in senso…	K04257|0|fca:101083961|olfactory receptor 52D1-like; K04257 olfactory receptor (A)	--	--	Olfactory receptor 1E1 GN=OR1E1 OS=Pan troglodytes (Chimpanzee) PE=3 SV=1	Olfactory receptor {ECO:0000256|RuleBase:RU000688} OS=Ovis aries (Sheep) PE=3 SV=1	PREDICTED: olfactory receptor 52K2-like [Felis catus]
gene19699	--	--	Molecular Function: G-protein coupled receptor activity (GO:0004930);; Molecular Function: olfactory receptor activity (GO:0004984);; Cellular Component: plasma membrane (GO:0005886);; Biological Process: G-protein coupled receptor signaling pathway (GO:0007186);; Cellular Component: integral component of membrane (GO:0016021);; Biological Process: detection of chemical stimulus involved in senso…	K04257|0|ecb:100069568|putative olfactory receptor 52P1-like; K04257 olfactory receptor (A)	--	--	Olfactory receptor-like protein OLF3 OS=Canis familiaris (Dog) PE=3 SV=1	Uncharacterized protein {ECO:0000313|Ensembl:ENSAMEP00000014090} OS=Ailuropoda melanoleuca (Giant panda) PE=4 SV=1	PREDICTED: putative olfactory receptor 52P1 [Equus przewalskii]
gene26884	--	--	--	K04257|1.32381e-69|myb:102252884|olfactory receptor 9Q1-like; K04257 olfactory receptor (A)	--	--	Olfactory receptor-like protein OLF2 OS=Canis familiaris (Dog) PE=3 SV=1	Olfactory receptor {ECO:0000256|RuleBase:RU000688} OS=Myotis lucifugus (Little brown bat) PE=3 SV=1	PREDICTED: olfactory receptor 9Q1-like [Ceratotherium simum simum]
gene4256	--	--	--	K04257|2.72454e-133|ecb:100065637|olfactory receptor 14C36-like; K04257 olfactory receptor (A)	--	--	Olfactory receptor-like protein OLF1 OS=Canis familiaris (Dog) PE=3 SV=1	Olfactory receptor 14C36-like protein {ECO:0000313|EMBL:EPY85959.1} OS=Camelus ferus (Wild Bactrian camel) PE=4 SV=1	PREDICTED: olfactory receptor 14C36-like [Condylura cristata]
gene17570	--	--	Molecular Function: G-protein coupled receptor activity (GO:0004930);; Molecular Function: olfactory receptor activity (GO:0004984);; Cellular Component: plasma membrane (GO:0005886);; Biological Process: G-protein coupled receptor signaling pathway (GO:0007186);; Cellular Component: integral component of membrane (GO:0016021);; Biological Process: detection of chemical stimulus involved in senso…	K04257|4.84271e-132|fca:101090380|olfactory receptor 5K4-like; K04257 olfactory receptor (A)	--	--	Olfactory receptor-like protein OLF1 OS=Canis familiaris (Dog) PE=3 SV=1	Olfactory receptor {ECO:0000256|RuleBase:RU000688} OS=Equus caballus (Horse) PE=3 SV=1	PREDICTED: LOW QUALITY PROTEIN: olfactory receptor 5K1-like [Equus przewalskii]
gene26559	--	--	Molecular Function: G-protein coupled receptor activity (GO:0004930);; Molecular Function: olfactory receptor activity (GO:0004984);; Cellular Component: plasma membrane (GO:0005886);; Biological Process: G-protein coupled receptor signaling pathway (GO:0007186);; Cellular Component: integral component of membrane (GO:0016021);; Biological Process: detection of chemical stimulus involved in senso…	K04257|1.50332e-102|cge:100760796|olfactory receptor 1030; K04257 olfactory receptor (A)	--	--	Olfactory receptor-like protein OLF2 OS=Canis familiaris (Dog) PE=3 SV=1	Olfactory receptor {ECO:0000256|RuleBase:RU000688} (Fragment) OS=Otolemur garnettii (Small-eared galago) PE=3 SV=1	PREDICTED: olfactory receptor 1030-like [Ochotona princeps]
gene7724	--	--	Molecular Function: G-protein coupled receptor activity (GO:0004930);; Molecular Function: olfactory receptor activity (GO:0004984);; Cellular Component: plasma membrane (GO:0005886);; Biological Process: G-protein coupled receptor signaling pathway (GO:0007186);; Cellular Component: integral component of membrane (GO:0016021);; Biological Process: detection of chemical stimulus involved in senso…	K04257|0|umr:103668965|olfactory receptor 2A5; K04257 olfactory receptor (A)	--	--	Olfactory receptor-like protein OLF3 OS=Canis familiaris (Dog) PE=3 SV=1	Olfactory receptor {ECO:0000256|RuleBase:RU000688} OS=Canis familiaris (Dog) PE=3 SV=1	PREDICTED: olfactory receptor 2A5-like [Mustela putorius furo]
gene13405	--	--	--	K04257|1.66284e-180|chx:102183604|olfactory receptor 4L1-like; K04257 olfactory receptor (A)	--	--	Olfactory receptor-like protein OLF1 OS=Canis familiaris (Dog) PE=3 SV=1	Olfactory receptor {ECO:0000256|RuleBase:RU000688} (Fragment) OS=Sus scrofa (Pig) PE=3 SV=2	PREDICTED: olfactory receptor 4L1-like [Vicugna pacos]
gene3416	--	--	Molecular Function: G-protein coupled receptor activity (GO:0004930);; Molecular Function: olfactory receptor activity (GO:0004984);; Cellular Component: plasma membrane (GO:0005886);; Biological Process: G-protein coupled receptor signaling pathway (GO:0007186);; Cellular Component: integral component of membrane (GO:0016021);; Biological Process: detection of chemical stimulus involved in senso…	K04257|1.88689e-148|pale:102887002|olfactory receptor-like protein OLF4-like; K04257 olfactory receptor (A)	--	--	Olfactory receptor-like protein OLF4 OS=Canis familiaris (Dog) PE=3 SV=1	Olfactory receptor {ECO:0000256|RuleBase:RU000688} OS=Pteropus alecto (Black flying fox) PE=3 SV=1	PREDICTED: olfactory receptor-like protein OLF4-like [Pteropus alecto]
gene11462	--	--	Molecular Function: G-protein coupled receptor activity (GO:0004930);; Molecular Function: olfactory receptor activity (GO:0004984);; Cellular Component: plasma membrane (GO:0005886);; Biological Process: G-protein coupled receptor signaling pathway (GO:0007186);; Cellular Component: integral component of membrane (GO:0016021);; Biological Process: detection of chemical stimulus involved in senso…	K04257|0|cfr:102506275|olfactory receptor 6Y1-like; K04257 olfactory receptor (A)	--	--	Olfactory receptor-like protein OLF1 OS=Canis familiaris (Dog) PE=3 SV=1	Olfactory receptor {ECO:0000256|RuleBase:RU000688} OS=Camelus ferus (Wild Bactrian camel) PE=3 SV=1	PREDICTED: olfactory receptor 6Y1 [Camelus dromedarius]
gene25663	--	--	--	K04257|2.37809e-123|myd:102774979|olfactory receptor 2D3-like; K04257 olfactory receptor (A)	--	--	Olfactory receptor-like protein OLF3 OS=Canis familiaris (Dog) PE=3 SV=1	Olfactory receptor {ECO:0000256|RuleBase:RU000688} OS=Myotis davidii (David's myotis) PE=3 SV=1	PREDICTED: olfactory receptor 2D3-like [Myotis davidii]
gene7002	--	--	Molecular Function: G-protein coupled receptor activity (GO:0004930);; Molecular Function: olfactory receptor activity (GO:0004984);; Cellular Component: plasma membrane (GO:0005886);; Biological Process: G-protein coupled receptor signaling pathway (GO:0007186);; Cellular Component: integral component of membrane (GO:0016021);; Biological Process: detection of chemical stimulus involved in senso…	K04257|1.54577e-100|ecb:100054453|olfactory receptor 5M10-like; K04257 olfactory receptor (A)	--	--	Olfactory receptor-like protein OLF1 OS=Canis familiaris (Dog) PE=3 SV=1	Olfactory receptor {ECO:0000256|RuleBase:RU000688} OS=Equus caballus (Horse) PE=3 SV=1	PREDICTED: olfactory receptor 5M10-like [Equus caballus]
gene14076	--	--	Molecular Function: G-protein coupled receptor activity (GO:0004930);; Molecular Function: olfactory receptor activity (GO:0004984);; Cellular Component: plasma membrane (GO:0005886);; Biological Process: G-protein coupled receptor signaling pathway (GO:0007186);; Cellular Component: integral component of membrane (GO:0016021);; Biological Process: detection of chemical stimulus involved in senso…	K04257|2.91252e-161|aml:100471799|olfactory receptor 10R2-like; K04257 olfactory receptor (A)	--	--	Olfactory receptor-like protein OLF3 OS=Canis familiaris (Dog) PE=3 SV=1	Olfactory receptor {ECO:0000256|RuleBase:RU000688} (Fragment) OS=Loxodonta africana (African elephant) PE=3 SV=1	PREDICTED: olfactory receptor 10R2-like [Loxodonta africana]
gene25254	--	--	Molecular Function: G-protein coupled receptor activity (GO:0004930);; Molecular Function: olfactory receptor activity (GO:0004984);; Cellular Component: plasma membrane (GO:0005886);; Biological Process: G-protein coupled receptor signaling pathway (GO:0007186);; Cellular Component: integral component of membrane (GO:0016021);; Biological Process: detection of chemical stimulus involved in senso…	K04257|2.23955e-180|bom:102271336|olfactory receptor 3A1-like; K04257 olfactory receptor (A)	--	--	Olfactory receptor 3A1 GN=OR3A1 OS=Pan troglodytes (Chimpanzee) PE=3 SV=1	Olfactory receptor {ECO:0000256|RuleBase:RU000688} OS=Bos taurus (Bovine) PE=3 SV=2	PREDICTED: olfactory receptor 3A1-like [Bos taurus]
gene6911	--	--	Molecular Function: G-protein coupled receptor activity (GO:0004930);; Molecular Function: olfactory receptor activity (GO:0004984);; Cellular Component: plasma membrane (GO:0005886);; Biological Process: G-protein coupled receptor signaling pathway (GO:0007186);; Cellular Component: integral component of membrane (GO:0016021);; Biological Process: detection of chemical stimulus involved in senso…	K04257|6.03912e-177|umr:103672966|olfactory receptor 1020-like; K04257 olfactory receptor (A)	--	--	Olfactory receptor-like protein OLF1 OS=Canis familiaris (Dog) PE=3 SV=1	Olfactory receptor {ECO:0000256|RuleBase:RU000688} (Fragment) OS=Sus scrofa (Pig) PE=3 SV=1	PREDICTED: olfactory receptor 151-like [Equus przewalskii]
gene24823	--	--	Molecular Function: G-protein coupled receptor activity (GO:0004930);; Molecular Function: olfactory receptor activity (GO:0004984);; Cellular Component: plasma membrane (GO:0005886);; Biological Process: G-protein coupled receptor signaling pathway (GO:0007186);; Cellular Component: integral component of membrane (GO:0016021);; Biological Process: detection of chemical stimulus involved in senso…	K04257|0|umr:103670474|olfactory receptor 1N2; K04257 olfactory receptor (A)	--	--	Olfactory receptor 1E2 GN=OR1E2 OS=Gorilla gorilla gorilla (Lowland gorilla) PE=3 SV=1	Olfactory receptor 1N2 {ECO:0000313|EMBL:ELK06632.1} OS=Pteropus alecto (Black flying fox) PE=4 SV=1	PREDICTED: olfactory receptor 1N2 [Ursus maritimus]
gene2696	--	--	Molecular Function: G-protein coupled receptor activity (GO:0004930);; Molecular Function: olfactory receptor activity (GO:0004984);; Cellular Component: plasma membrane (GO:0005886);; Biological Process: G-protein coupled receptor signaling pathway (GO:0007186);; Cellular Component: integral component of membrane (GO:0016021);; Biological Process: detection of chemical stimulus involved in senso…	K04257|0|tup:102480099|olfactory receptor 13A1-like; K04257 olfactory receptor (A)	--	--	Olfactory receptor 1G1 GN=OR1G1 OS=Gorilla gorilla gorilla (Lowland gorilla) PE=3 SV=1	Olfactory receptor {ECO:0000256|RuleBase:RU000688} OS=Mustela putorius furo (European domestic ferret) PE=3 SV=1	PREDICTED: olfactory receptor 13A1-like [Tupaia chinensis]
gene1514	--	--	Molecular Function: G-protein coupled receptor activity (GO:0004930);; Molecular Function: olfactory receptor activity (GO:0004984);; Cellular Component: plasma membrane (GO:0005886);; Biological Process: G-protein coupled receptor signaling pathway (GO:0007186);; Cellular Component: integral component of membrane (GO:0016021);; Biological Process: detection of chemical stimulus involved in senso…	K04257|4.10844e-158|ocu:100358202|olfactory receptor 1J4-like; K04257 olfactory receptor (A)	--	--	Olfactory receptor 1E5 GN=OR1E5 OS=Pan troglodytes (Chimpanzee) PE=3 SV=1	Olfactory receptor {ECO:0000256|RuleBase:RU000688} OS=Pteropus alecto (Black flying fox) PE=3 SV=1	PREDICTED: olfactory receptor 1J4-like [Chrysochloris asiatica]
gene25979	--	--	--	K04257|6.01662e-158|umr:103672276|olfactory receptor 4C46; K04257 olfactory receptor (A)	--	--	Olfactory receptor 1E1 GN=OR1E1 OS=Pan troglodytes (Chimpanzee) PE=3 SV=1	Olfactory receptor {ECO:0000256|RuleBase:RU000688} OS=Mustela putorius furo (European domestic ferret) PE=3 SV=1	PREDICTED: olfactory receptor 4C46 [Ursus maritimus]
gene142	--	--	Molecular Function: G-protein coupled receptor activity (GO:0004930);; Molecular Function: olfactory receptor activity (GO:0004984);; Cellular Component: plasma membrane (GO:0005886);; Biological Process: G-protein coupled receptor signaling pathway (GO:0007186);; Cellular Component: integral component of membrane (GO:0016021);; Biological Process: detection of chemical stimulus involved in senso…	K04257|3.22761e-97|tup:102497753|olfactory receptor 2S2-like; K04257 olfactory receptor (A)	--	--	Olfactory receptor-like protein OLF3 OS=Canis familiaris (Dog) PE=3 SV=1	Olfactory receptor 2S2 {ECO:0000313|EMBL:ELW70321.1} OS=Tupaia chinensis (Chinese tree shrew) PE=3 SV=1	PREDICTED: olfactory receptor 2S2-like [Mustela putorius furo]
gene10718	--	--	Molecular Function: G-protein coupled receptor activity (GO:0004930);; Molecular Function: olfactory receptor activity (GO:0004984);; Cellular Component: plasma membrane (GO:0005886);; Biological Process: G-protein coupled receptor signaling pathway (GO:0007186);; Cellular Component: integral component of membrane (GO:0016021);; Biological Process: detection of chemical stimulus involved in senso…	K04257|0|ecb:100057387|olfactory receptor 12D2-like; K04257 olfactory receptor (A)	--	--	Olfactory receptor 1E2 GN=OR1E2 OS=Pan troglodytes (Chimpanzee) PE=3 SV=1	Olfactory receptor {ECO:0000256|RuleBase:RU000688} OS=Equus caballus (Horse) PE=3 SV=1	PREDICTED: olfactory receptor 12D2-like [Ceratotherium simum simum]
gene4629	--	--	Molecular Function: G-protein coupled receptor activity (GO:0004930);; Molecular Function: olfactory receptor activity (GO:0004984);; Cellular Component: plasma membrane (GO:0005886);; Biological Process: G-protein coupled receptor signaling pathway (GO:0007186);; Cellular Component: integral component of membrane (GO:0016021);; Biological Process: detection of chemical stimulus involved in senso…	K04257|1.05725e-157|ecb:100058198|olfactory receptor 8S1-like; K04257 olfactory receptor (A)	--	--	Olfactory receptor 1E5 GN=OR1E5 OS=Pan troglodytes (Chimpanzee) PE=3 SV=1	Olfactory receptor {ECO:0000256|RuleBase:RU000688} OS=Equus caballus (Horse) PE=3 SV=1	PREDICTED: olfactory receptor 8S1-like [Equus caballus]
gene11100	--	--	Molecular Function: G-protein coupled receptor activity (GO:0004930);; Molecular Function: olfactory receptor activity (GO:0004984);; Cellular Component: plasma membrane (GO:0005886);; Biological Process: G-protein coupled receptor signaling pathway (GO:0007186);; Cellular Component: integral component of membrane (GO:0016021);; Biological Process: detection of chemical stimulus involved in senso…	K04257|1.53719e-109|ssc:100737488|olfactory receptor 51I2-like; K04257 olfactory receptor (A)	--	--	Olfactory receptor 1E1 GN=OR1E1 OS=Pan troglodytes (Chimpanzee) PE=3 SV=1	Olfactory receptor {ECO:0000256|RuleBase:RU000688} OS=Otolemur garnettii (Small-eared galago) PE=3 SV=1	PREDICTED: olfactory receptor 51I2-like [Sorex araneus]
gene20471	--	--	Molecular Function: transmembrane signaling receptor activity (GO:0004888);; Biological Process: signal transduction (GO:0007165);; Biological Process: sensory perception of smell (GO:0007608);; Cellular Component: membrane (GO:0016020);;	K04257|1.91841e-134|ptg:102969696|olfactory receptor 5AK2-like; K04257 olfactory receptor (A)	--	--	Olfactory receptor-like protein OLF2 OS=Canis familiaris (Dog) PE=3 SV=1	Olfactory receptor {ECO:0000256|RuleBase:RU000688} OS=Felis catus (Cat) PE=3 SV=1	PREDICTED: olfactory receptor 5AK2-like [Panthera tigris altaica]
gene21188	--	--	Molecular Function: G-protein coupled receptor activity (GO:0004930);; Molecular Function: olfactory receptor activity (GO:0004984);; Cellular Component: plasma membrane (GO:0005886);; Biological Process: G-protein coupled receptor signaling pathway (GO:0007186);; Cellular Component: integral component of membrane (GO:0016021);; Biological Process: detection of chemical stimulus involved in senso…	K04257|6.63062e-152|cfa:483603|cOR4C43; cOR4C43 olfactory receptor family 4 subfamily C-like; K04257 olfactory receptor (A)	--	--	Olfactory receptor-like protein OLF1 OS=Canis familiaris (Dog) PE=3 SV=1	Olfactory receptor {ECO:0000256|RuleBase:RU000688} OS=Canis familiaris (Dog) PE=3 SV=1	PREDICTED: olfactory receptor 4C46 [Canis lupus familiaris]
gene7200	--	--	Molecular Function: G-protein coupled receptor activity (GO:0004930);; Molecular Function: olfactory receptor activity (GO:0004984);; Cellular Component: plasma membrane (GO:0005886);; Biological Process: G-protein coupled receptor signaling pathway (GO:0007186);; Cellular Component: integral component of membrane (GO:0016021);; Biological Process: detection of chemical stimulus involved in senso…	K04257|5.59603e-151|fca:101080978|olfactory receptor 8S1-like; K04257 olfactory receptor (A)	--	--	Olfactory receptor 1G1 GN=OR1G1 OS=Gorilla gorilla gorilla (Lowland gorilla) PE=3 SV=1	Olfactory receptor {ECO:0000256|RuleBase:RU000688} (Fragment) OS=Sus scrofa (Pig) PE=3 SV=1	PREDICTED: olfactory receptor 8S1-like [Felis catus]
gene26490	--	--	Molecular Function: G-protein coupled receptor activity (GO:0004930);; Molecular Function: olfactory receptor activity (GO:0004984);; Cellular Component: plasma membrane (GO:0005886);; Biological Process: G-protein coupled receptor signaling pathway (GO:0007186);; Cellular Component: integral component of membrane (GO:0016021);; Biological Process: detection of chemical stimulus involved in senso…	K04257|6.7497e-132|umr:103676329|olfactory receptor 7G2-like; K04257 olfactory receptor (A)	--	--	Olfactory receptor-like protein OLF4 OS=Canis familiaris (Dog) PE=3 SV=1	Olfactory receptor {ECO:0000256|RuleBase:RU000688} OS=Mustela putorius furo (European domestic ferret) PE=3 SV=1	PREDICTED: olfactory receptor 7G2-like [Mustela putorius furo]
gene472	--	--	Molecular Function: G-protein coupled receptor activity (GO:0004930);; Molecular Function: olfactory receptor activity (GO:0004984);; Cellular Component: plasma membrane (GO:0005886);; Biological Process: G-protein coupled receptor signaling pathway (GO:0007186);; Cellular Component: integral component of membrane (GO:0016021);; Biological Process: detection of chemical stimulus involved in senso…	K04257|0|aml:100464215|olfactory receptor-like protein DTMT-like; K04257 olfactory receptor (A)	--	--	Olfactory receptor 1E5 GN=OR1E5 OS=Pan troglodytes (Chimpanzee) PE=3 SV=1	Olfactory receptor {ECO:0000256|RuleBase:RU000688} OS=Mustela putorius furo (European domestic ferret) PE=3 SV=1	PREDICTED: olfactory receptor 1E5-like [Echinops telfairi]
gene24316	--	--	Molecular Function: G-protein coupled receptor activity (GO:0004930);; Molecular Function: olfactory receptor activity (GO:0004984);; Cellular Component: plasma membrane (GO:0005886);; Biological Process: G-protein coupled receptor signaling pathway (GO:0007186);; Cellular Component: integral component of membrane (GO:0016021);; Biological Process: detection of chemical stimulus involved in senso…	K04257|0|tup:102480331|olfactory receptor 1L4-like; K04257 olfactory receptor (A)	--	--	Olfactory receptor 1A1 GN=OR1A1 OS=Pan troglodytes (Chimpanzee) PE=3 SV=1	Olfactory receptor 1L6 {ECO:0000313|EMBL:ELW48514.1} OS=Tupaia chinensis (Chinese tree shrew) PE=4 SV=1	PREDICTED: olfactory receptor 1L4-like [Tupaia chinensis]
gene19199	--	--	Molecular Function: G-protein coupled receptor activity (GO:0004930);; Molecular Function: olfactory receptor activity (GO:0004984);; Cellular Component: plasma membrane (GO:0005886);; Biological Process: G-protein coupled receptor signaling pathway (GO:0007186);; Cellular Component: integral component of membrane (GO:0016021);; Biological Process: detection of chemical stimulus involved in senso…	K04257|8.71674e-165|fca:101091078|olfactory receptor 14K1-like; K04257 olfactory receptor (A)	--	--	Olfactory receptor 1G1 GN=OR1G1 OS=Gorilla gorilla gorilla (Lowland gorilla) PE=3 SV=1	Olfactory receptor {ECO:0000256|RuleBase:RU000688} OS=Felis catus (Cat) PE=3 SV=1	PREDICTED: olfactory receptor 14K1-like [Felis catus]
gene10417	--	--	Molecular Function: G-protein coupled receptor activity (GO:0004930);; Molecular Function: olfactory receptor activity (GO:0004984);; Cellular Component: plasma membrane (GO:0005886);; Biological Process: G-protein coupled receptor signaling pathway (GO:0007186);; Cellular Component: integral component of membrane (GO:0016021);; Biological Process: detection of chemical stimulus involved in senso…	K04257|5.01276e-177|ptg:102950320|olfactory receptor 5B12-like; K04257 olfactory receptor (A)	--	--	Olfactory receptor-like protein OLF2 OS=Canis familiaris (Dog) PE=3 SV=1	Olfactory receptor {ECO:0000256|RuleBase:RU000688} (Fragment) OS=Felis catus (Cat) PE=3 SV=1	PREDICTED: olfactory receptor 5B12-like [Panthera tigris altaica]
gene8162	--	--	Molecular Function: G-protein coupled receptor activity (GO:0004930);; Molecular Function: olfactory receptor activity (GO:0004984);; Cellular Component: plasma membrane (GO:0005886);; Biological Process: G-protein coupled receptor signaling pathway (GO:0007186);; Cellular Component: integral component of membrane (GO:0016021);; Biological Process: detection of chemical stimulus involved in senso…	K04257|2.05175e-169|fca:101091078|olfactory receptor 14K1-like; K04257 olfactory receptor (A)	--	--	Olfactory receptor 1G1 GN=OR1G1 OS=Gorilla gorilla gorilla (Lowland gorilla) PE=3 SV=1	Olfactory receptor {ECO:0000256|RuleBase:RU000688} OS=Felis catus (Cat) PE=3 SV=1	PREDICTED: olfactory receptor 14K1-like [Felis catus]
gene23392	--	--	Molecular Function: G-protein coupled receptor activity (GO:0004930);; Molecular Function: olfactory receptor activity (GO:0004984);; Cellular Component: plasma membrane (GO:0005886);; Biological Process: G-protein coupled receptor signaling pathway (GO:0007186);; Cellular Component: integral component of membrane (GO:0016021);; Biological Process: detection of chemical stimulus involved in senso…	K04257|7.26971e-146|oas:101104994|olfactory receptor 7A17-like; K04257 olfactory receptor (A)	--	--	Olfactory receptor-like protein OLF4 OS=Canis familiaris (Dog) PE=3 SV=1	Olfactory receptor {ECO:0000256|RuleBase:RU000688} (Fragment) OS=Bos mutus PE=3 SV=1	PREDICTED: olfactory receptor 7A17-like [Ovis aries]
gene6575	--	--	Molecular Function: G-protein coupled receptor activity (GO:0004930);; Molecular Function: olfactory receptor activity (GO:0004984);; Cellular Component: plasma membrane (GO:0005886);; Biological Process: G-protein coupled receptor signaling pathway (GO:0007186);; Cellular Component: integral component of membrane (GO:0016021);; Biological Process: detection of chemical stimulus involved in senso…	K04257|3.70854e-154|aml:100471943|olfactory receptor 7G2-like; K04257 olfactory receptor (A)	--	--	Olfactory receptor-like protein OLF4 OS=Canis familiaris (Dog) PE=3 SV=1	Olfactory receptor {ECO:0000256|RuleBase:RU000688} OS=Mustela putorius furo (European domestic ferret) PE=3 SV=1	PREDICTED: olfactory receptor 7G2-like [Mustela putorius furo]
gene16408	--	--	Molecular Function: G-protein coupled receptor activity (GO:0004930);; Molecular Function: olfactory receptor activity (GO:0004984);; Cellular Component: plasma membrane (GO:0005886);; Cellular Component: integral component of membrane (GO:0016021);;	K04257|7.78376e-175|umr:103656568|olfactory receptor 6C2-like; K04257 olfactory receptor (A)	--	--	Olfactory receptor-like protein OLF1 OS=Canis familiaris (Dog) PE=3 SV=1	Olfactory receptor {ECO:0000256|RuleBase:RU000688} OS=Canis familiaris (Dog) PE=3 SV=1	PREDICTED: olfactory receptor 6C68-like [Ceratotherium simum simum]
gene17025	--	--	Molecular Function: G-protein coupled receptor activity (GO:0004930);; Molecular Function: olfactory receptor activity (GO:0004984);; Cellular Component: plasma membrane (GO:0005886);; Biological Process: G-protein coupled receptor signaling pathway (GO:0007186);; Cellular Component: integral component of membrane (GO:0016021);; Biological Process: detection of chemical stimulus involved in senso…	K04257|0|umr:103666052|olfactory receptor 5W2-like; K04257 olfactory receptor (A)	--	--	Olfactory receptor-like protein OLF2 OS=Canis familiaris (Dog) PE=3 SV=1	Olfactory receptor {ECO:0000256|RuleBase:RU000688} (Fragment) OS=Ailuropoda melanoleuca (Giant panda) PE=3 SV=1	PREDICTED: olfactory receptor 5W2-like [Ursus maritimus]
gene9397	--	--	Molecular Function: G-protein coupled receptor activity (GO:0004930);; Molecular Function: olfactory receptor activity (GO:0004984);; Cellular Component: plasma membrane (GO:0005886);; Biological Process: G-protein coupled receptor signaling pathway (GO:0007186);; Cellular Component: integral component of membrane (GO:0016021);; Biological Process: detection of chemical stimulus involved in senso…	K04257|0|cfr:102507633|olfactory receptor 2T2-like; K04257 olfactory receptor (A)	--	--	Olfactory receptor-like protein OLF3 OS=Canis familiaris (Dog) PE=3 SV=1	Olfactory receptor {ECO:0000256|RuleBase:RU000688} OS=Camelus ferus (Wild Bactrian camel) PE=3 SV=1	PREDICTED: olfactory receptor 2T2-like [Camelus ferus]
gene18541	--	--	Molecular Function: G-protein coupled receptor activity (GO:0004930);; Molecular Function: olfactory receptor activity (GO:0004984);; Cellular Component: plasma membrane (GO:0005886);; Biological Process: G-protein coupled receptor signaling pathway (GO:0007186);; Cellular Component: integral component of membrane (GO:0016021);; Biological Process: detection of chemical stimulus involved in senso…	K04257|0|oas:101107296|olfactory receptor 1A1-like; K04257 olfactory receptor (A)	--	--	Olfactory receptor 1A1 GN=OR1A1 OS=Pan troglodytes (Chimpanzee) PE=3 SV=1	Uncharacterized protein {ECO:0000313|Ensembl:ENSOARP00000004385} OS=Ovis aries (Sheep) PE=4 SV=1	PREDICTED: olfactory receptor 1A1-like [Ovis aries]
gene3812	--	--	Molecular Function: transmembrane signaling receptor activity (GO:0004888);; Cellular Component: membrane (GO:0016020);; Biological Process: single-organism process (GO:0044699);; Biological Process: response to stimulus (GO:0050896);;	K04257|1.40283e-90|umr:103682425|olfactory receptor 2L8-like; K04257 olfactory receptor (A)	--	--	Olfactory receptor-like protein OLF1 OS=Canis familiaris (Dog) PE=3 SV=1	Olfactory receptor {ECO:0000256|RuleBase:RU000688} OS=Macaca mulatta (Rhesus macaque) PE=3 SV=1	PREDICTED: olfactory receptor 2L8-like [Ursus maritimus]
gene24097	--	--	Molecular Function: G-protein coupled receptor activity (GO:0004930);; Molecular Function: olfactory receptor activity (GO:0004984);; Cellular Component: plasma membrane (GO:0005886);; Biological Process: G-protein coupled receptor signaling pathway (GO:0007186);; Cellular Component: integral component of membrane (GO:0016021);; Biological Process: detection of chemical stimulus involved in senso…	K04257|0|mcc:708692|OR10G2; olfactory receptor 10G2; K04257 olfactory receptor (A)	--	--	Olfactory receptor 3A1 GN=OR3A1 OS=Pan troglodytes (Chimpanzee) PE=3 SV=1	Olfactory receptor 10G2 {ECO:0000313|EMBL:ELV14116.1} OS=Tupaia chinensis (Chinese tree shrew) PE=4 SV=1	PREDICTED: olfactory receptor 10G2-like [Tupaia chinensis]
gene14430	--	--	Molecular Function: G-protein coupled receptor activity (GO:0004930);; Molecular Function: olfactory receptor activity (GO:0004984);; Cellular Component: plasma membrane (GO:0005886);; Biological Process: G-protein coupled receptor signaling pathway (GO:0007186);; Cellular Component: integral component of membrane (GO:0016021);; Biological Process: detection of chemical stimulus involved in senso…	K04257|0|ecb:100070906|olfactory receptor 5A2-like; K04257 olfactory receptor (A)	--	--	Olfactory receptor-like protein OLF2 OS=Canis familiaris (Dog) PE=3 SV=1	Olfactory receptor {ECO:0000256|RuleBase:RU000688} OS=Tupaia chinensis (Chinese tree shrew) PE=3 SV=1	PREDICTED: olfactory receptor 5A2-like [Equus caballus]
gene10495	--	--	Molecular Function: G-protein coupled receptor activity (GO:0004930);; Molecular Function: olfactory receptor activity (GO:0004984);; Cellular Component: plasma membrane (GO:0005886);; Biological Process: G-protein coupled receptor signaling pathway (GO:0007186);; Cellular Component: integral component of membrane (GO:0016021);; Biological Process: detection of chemical stimulus involved in senso…	K04257|0|umr:103662020|olfactory receptor 5AC1; K04257 olfactory receptor (A)	--	--	Olfactory receptor-like protein OLF1 OS=Canis familiaris (Dog) PE=3 SV=1	Olfactory receptor {ECO:0000256|RuleBase:RU000688} OS=Pteropus alecto (Black flying fox) PE=3 SV=1	PREDICTED: olfactory receptor 5AC1 [Ursus maritimus]
gene2744	--	--	Molecular Function: G-protein coupled receptor activity (GO:0004930);; Molecular Function: olfactory receptor activity (GO:0004984);; Cellular Component: plasma membrane (GO:0005886);; Biological Process: G-protein coupled receptor signaling pathway (GO:0007186);; Cellular Component: integral component of membrane (GO:0016021);; Biological Process: detection of chemical stimulus involved in senso…	K04257|7.47498e-180|cfr:102509366|olfactory receptor 5AU1-like; K04257 olfactory receptor (A)	--	--	Olfactory receptor-like protein OLF1 OS=Canis familiaris (Dog) PE=3 SV=1	Olfactory receptor {ECO:0000256|RuleBase:RU000688} OS=Camelus ferus (Wild Bactrian camel) PE=3 SV=1	PREDICTED: olfactory receptor 5AU1-like [Camelus ferus]
gene12604	--	--	Molecular Function: G-protein coupled receptor activity (GO:0004930);; Molecular Function: olfactory receptor activity (GO:0004984);; Cellular Component: plasma membrane (GO:0005886);; Biological Process: G-protein coupled receptor signaling pathway (GO:0007186);; Cellular Component: integral component of membrane (GO:0016021);; Biological Process: detection of chemical stimulus involved in senso…	K04257|0|cfr:102508625|olfactory receptor 688-like; K04257 olfactory receptor (A)	--	--	Olfactory receptor-like protein OLF3 OS=Canis familiaris (Dog) PE=3 SV=1	Olfactory receptor 688-like protein {ECO:0000313|EMBL:EPY80471.1} OS=Camelus ferus (Wild Bactrian camel) PE=4 SV=1	PREDICTED: olfactory receptor 688-like [Camelus ferus]
gene13709	--	--	Molecular Function: G-protein coupled receptor activity (GO:0004930);; Molecular Function: olfactory receptor activity (GO:0004984);; Cellular Component: plasma membrane (GO:0005886);; Biological Process: G-protein coupled receptor signaling pathway (GO:0007186);; Cellular Component: integral component of membrane (GO:0016021);; Biological Process: detection of chemical stimulus involved in senso…	K04257|1.4233e-168|myb:102252985|olfactory receptor 56A1-like; K04257 olfactory receptor (A)	--	--	Olfactory receptor 1G1 GN=OR1G1 OS=Gorilla gorilla gorilla (Lowland gorilla) PE=3 SV=1	Uncharacterized protein {ECO:0000313|Ensembl:ENSMLUP00000006406} OS=Myotis lucifugus (Little brown bat) PE=4 SV=1	PREDICTED: olfactory receptor 56A4-like [Ceratotherium simum simum]
gene26545	--	--	Molecular Function: G-protein coupled receptor activity (GO:0004930);; Molecular Function: olfactory receptor activity (GO:0004984);; Cellular Component: plasma membrane (GO:0005886);; Biological Process: G-protein coupled receptor signaling pathway (GO:0007186);; Cellular Component: integral component of membrane (GO:0016021);; Biological Process: detection of chemical stimulus involved in senso…	K04257|7.87108e-130|ecb:100068521|olfactory receptor 14C36-like; K04257 olfactory receptor (A)	--	--	Olfactory receptor 1G1 GN=OR1G1 OS=Gorilla gorilla gorilla (Lowland gorilla) PE=3 SV=1	Olfactory receptor 14C36-like protein {ECO:0000313|EMBL:EPY85959.1} OS=Camelus ferus (Wild Bactrian camel) PE=4 SV=1	PREDICTED: olfactory receptor 14C36-like [Erinaceus europaeus]
gene27118	--	--	Molecular Function: G-protein coupled receptor activity (GO:0004930);; Molecular Function: olfactory receptor activity (GO:0004984);; Cellular Component: plasma membrane (GO:0005886);; Biological Process: G-protein coupled receptor signaling pathway (GO:0007186);; Cellular Component: integral component of membrane (GO:0016021);; Biological Process: detection of chemical stimulus involved in senso…	K04257|0|ptg:102968212|olfactory receptor 5B2-like; K04257 olfactory receptor (A)	--	--	Olfactory receptor-like protein OLF2 OS=Canis familiaris (Dog) PE=3 SV=1	Olfactory receptor {ECO:0000256|RuleBase:RU000688} (Fragment) OS=Ailuropoda melanoleuca (Giant panda) PE=3 SV=1	PREDICTED: olfactory receptor 5B2-like [Panthera tigris altaica]
gene26890	--	--	Molecular Function: G-protein coupled receptor activity (GO:0004930);; Molecular Function: olfactory receptor activity (GO:0004984);; Cellular Component: plasma membrane (GO:0005886);; Biological Process: G-protein coupled receptor signaling pathway (GO:0007186);; Cellular Component: integral component of membrane (GO:0016021);; Biological Process: detection of chemical stimulus involved in senso…	K04257|0|cfa:100686849|olfactory receptor-like protein OLF1-like; K04257 olfactory receptor (A)	--	--	Olfactory receptor-like protein OLF1 OS=Canis familiaris (Dog) PE=3 SV=1	Olfactory receptor {ECO:0000256|RuleBase:RU000688} OS=Canis familiaris (Dog) PE=3 SV=1	PREDICTED: olfactory receptor-like protein OLF1-like [Canis lupus familiaris]
gene4250	--	--	Molecular Function: G-protein coupled receptor activity (GO:0004930);; Molecular Function: olfactory receptor activity (GO:0004984);; Cellular Component: plasma membrane (GO:0005886);; Biological Process: G-protein coupled receptor signaling pathway (GO:0007186);; Cellular Component: integral component of membrane (GO:0016021);; Biological Process: detection of chemical stimulus involved in senso…	K04257|0|ssc:100623714|olfactory receptor 2T4-like; K04257 olfactory receptor (A)	--	--	Olfactory receptor-like protein OLF2 OS=Canis familiaris (Dog) PE=3 SV=1	Olfactory receptor {ECO:0000256|RuleBase:RU000688} OS=Sus scrofa (Pig) PE=3 SV=1	PREDICTED: olfactory receptor 2T4-like [Sus scrofa]
gene23543	--	--	Molecular Function: G-protein coupled receptor activity (GO:0004930);; Molecular Function: olfactory receptor activity (GO:0004984);; Cellular Component: plasma membrane (GO:0005886);; Biological Process: G-protein coupled receptor signaling pathway (GO:0007186);; Cellular Component: integral component of membrane (GO:0016021);; Biological Process: detection of chemical stimulus involved in senso…	K04257|2.0833e-138|umr:103680375|olfactory receptor 2T33-like; K04257 olfactory receptor (A)	--	--	Olfactory receptor-like protein OLF3 OS=Canis familiaris (Dog) PE=3 SV=1	Olfactory receptor {ECO:0000256|RuleBase:RU000688} (Fragment) OS=Sus scrofa (Pig) PE=3 SV=1	PREDICTED: olfactory receptor 2T33-like [Ursus maritimus]
gene26638	--	--	Molecular Function: G-protein coupled receptor activity (GO:0004930);; Molecular Function: olfactory receptor activity (GO:0004984);; Cellular Component: plasma membrane (GO:0005886);; Biological Process: G-protein coupled receptor signaling pathway (GO:0007186);; Cellular Component: integral component of membrane (GO:0016021);; Biological Process: detection of chemical stimulus involved in senso…	K04257|6.15587e-102|tup:102495406|olfactory receptor 13A1-like; K04257 olfactory receptor (A)	--	--	Olfactory receptor 1D2 GN=OR1D2 OS=Gorilla gorilla gorilla (Lowland gorilla) PE=3 SV=1	Uncharacterized protein {ECO:0000313|Ensembl:ENSECAP00000003186} (Fragment) OS=Equus caballus (Horse) PE=4 SV=1	PREDICTED: olfactory receptor 13A1-like [Equus przewalskii]
gene20328	--	--	--	K04257|5.30523e-118|mcf:102136769|olfactory receptor 14I1-like; K04257 olfactory receptor (A)	--	--	Olfactory receptor-like protein OLF1 OS=Canis familiaris (Dog) PE=3 SV=1	Uncharacterized protein {ECO:0000313|Ensembl:ENSAMEP00000004940} (Fragment) OS=Ailuropoda melanoleuca (Giant panda) PE=3 SV=1	PREDICTED: olfactory receptor 14I1-like [Chrysochloris asiatica]
gene11580	--	--	Molecular Function: G-protein coupled receptor activity (GO:0004930);; Molecular Function: olfactory receptor activity (GO:0004984);; Cellular Component: plasma membrane (GO:0005886);; Biological Process: G-protein coupled receptor signaling pathway (GO:0007186);; Cellular Component: integral component of membrane (GO:0016021);; Biological Process: detection of chemical stimulus involved in senso…	K04257|2.74021e-180|ecb:100072141|olfactory receptor 4F15-like; K04257 olfactory receptor (A)	--	--	Olfactory receptor-like protein DTMT OS=Canis familiaris (Dog) PE=3 SV=1	Olfactory receptor {ECO:0000256|RuleBase:RU000688} OS=Loxodonta africana (African elephant) PE=3 SV=1	PREDICTED: olfactory receptor 4F15-like [Mustela putorius furo]
gene8989	--	--	Molecular Function: G-protein coupled receptor activity (GO:0004930);; Molecular Function: olfactory receptor activity (GO:0004984);; Cellular Component: plasma membrane (GO:0005886);; Biological Process: G-protein coupled receptor signaling pathway (GO:0007186);; Cellular Component: integral component of membrane (GO:0016021);; Biological Process: detection of chemical stimulus involved in senso…	K04257|0|ptg:102951873|olfactory receptor 4D2-like; K04257 olfactory receptor (A)	--	--	Olfactory receptor 1G1 GN=OR1G1 OS=Gorilla gorilla gorilla (Lowland gorilla) PE=3 SV=1	Uncharacterized protein {ECO:0000313|Ensembl:ENSFCAP00000023299} OS=Felis catus (Cat) PE=4 SV=1	PREDICTED: olfactory receptor 4D2-like [Panthera tigris altaica]
gene11098	--	--	Molecular Function: G-protein coupled receptor activity (GO:0004930);; Molecular Function: olfactory receptor activity (GO:0004984);; Cellular Component: plasma membrane (GO:0005886);; Biological Process: G-protein coupled receptor signaling pathway (GO:0007186);; Cellular Component: integral component of membrane (GO:0016021);; Biological Process: detection of chemical stimulus involved in senso…	K04257|0|bta:526623|OR51E1; olfactory receptor, family 51, subfamily E, member 1; K04257 olfactory receptor (A)	--	--	Olfactory receptor 1E5 GN=OR1E5 OS=Pan troglodytes (Chimpanzee) PE=3 SV=1	Olfactory receptor {ECO:0000256|RuleBase:RU000688} OS=Bos taurus (Bovine) PE=3 SV=2	PREDICTED: olfactory receptor 51E1 [Bos taurus]
gene25900	--	--	--	K04257|2.57884e-148|cge:100762163|olfactory receptor 52K1; K04257 olfactory receptor (A)	--	--	Olfactory receptor 1E1 GN=OR1E1 OS=Pan troglodytes (Chimpanzee) PE=3 SV=1	Olfactory receptor {ECO:0000256|RuleBase:RU000688} OS=Mustela putorius furo (European domestic ferret) PE=3 SV=1	PREDICTED: olfactory receptor 52K1-like [Ceratotherium simum simum]
gene16679	--	--	Molecular Function: transmembrane signaling receptor activity (GO:0004888);; Biological Process: signal transduction (GO:0007165);; Biological Process: sensory perception of smell (GO:0007608);; Cellular Component: membrane (GO:0016020);;	K04257|5.14418e-123|tup:102494593|olfactory receptor 13A1-like; K04257 olfactory receptor (A)	--	--	Olfactory receptor 3A2 GN=OR3A2 OS=Pan troglodytes (Chimpanzee) PE=3 SV=1	Olfactory receptor 13G1 {ECO:0000313|EMBL:ELW67338.1} OS=Tupaia chinensis (Chinese tree shrew) PE=4 SV=1	PREDICTED: olfactory receptor 13A1-like [Chrysochloris asiatica]
gene18326	--	--	Molecular Function: G-protein coupled receptor activity (GO:0004930);; Molecular Function: olfactory receptor activity (GO:0004984);; Cellular Component: plasma membrane (GO:0005886);; Biological Process: G-protein coupled receptor signaling pathway (GO:0007186);; Cellular Component: integral component of membrane (GO:0016021);; Biological Process: detection of chemical stimulus involved in senso…	K04257|2.36044e-173|bacu:103014646|olfactory receptor 1J2-like; K04257 olfactory receptor (A)	--	--	Olfactory receptor 1E5 GN=OR1E5 OS=Pan troglodytes (Chimpanzee) PE=3 SV=1	Olfactory receptor {ECO:0000256|RuleBase:RU000688} OS=Camelus ferus (Wild Bactrian camel) PE=3 SV=1	PREDICTED: olfactory receptor 1J2-like [Balaenoptera acutorostrata scammoni]
gene4239	--	--	Molecular Function: G-protein coupled receptor activity (GO:0004930);; Molecular Function: olfactory receptor activity (GO:0004984);; Cellular Component: plasma membrane (GO:0005886);; Biological Process: G-protein coupled receptor signaling pathway (GO:0007186);; Cellular Component: integral component of membrane (GO:0016021);; Biological Process: detection of chemical stimulus involved in senso…	K04257|5.72386e-112|umr:103656330|olfactory receptor 2T1; K04257 olfactory receptor (A)	--	--	Olfactory receptor-like protein OLF3 OS=Canis familiaris (Dog) PE=3 SV=1	Olfactory receptor {ECO:0000256|RuleBase:RU000688} (Fragment) OS=Ailuropoda melanoleuca (Giant panda) PE=3 SV=1	PREDICTED: olfactory receptor 2T1 [Ursus maritimus]
gene5254	--	--	Molecular Function: G-protein coupled receptor activity (GO:0004930);; Molecular Function: olfactory receptor activity (GO:0004984);; Cellular Component: plasma membrane (GO:0005886);; Biological Process: G-protein coupled receptor signaling pathway (GO:0007186);; Cellular Component: integral component of membrane (GO:0016021);; Biological Process: detection of chemical stimulus involved in senso…	K04257|1.47671e-171|ssc:100620594|olfactory receptor 2M4-like; K04257 olfactory receptor (A)	--	--	Olfactory receptor-like protein OLF3 OS=Canis familiaris (Dog) PE=3 SV=1	Olfactory receptor {ECO:0000256|RuleBase:RU000688} OS=Sus scrofa (Pig) PE=3 SV=1	PREDICTED: olfactory receptor 2M4-like [Sus scrofa]
gene14746	--	--	Molecular Function: G-protein coupled receptor activity (GO:0004930);; Molecular Function: olfactory receptor activity (GO:0004984);; Cellular Component: plasma membrane (GO:0005886);; Biological Process: G-protein coupled receptor signaling pathway (GO:0007186);; Cellular Component: integral component of membrane (GO:0016021);; Biological Process: detection of chemical stimulus involved in senso…	K04257|2.39312e-159|oas:101121800|olfactory receptor 4B1-like; K04257 olfactory receptor (A)	--	--	Olfactory receptor 1G1 GN=OR1G1 OS=Pan troglodytes (Chimpanzee) PE=3 SV=1	Olfactory receptor {ECO:0000256|RuleBase:RU000688} OS=Camelus ferus (Wild Bactrian camel) PE=3 SV=1	PREDICTED: olfactory receptor 4B1-like [Ovis aries]
gene576	--	--	Molecular Function: G-protein coupled receptor activity (GO:0004930);; Molecular Function: olfactory receptor activity (GO:0004984);; Cellular Component: plasma membrane (GO:0005886);; Biological Process: G-protein coupled receptor signaling pathway (GO:0007186);; Cellular Component: integral component of membrane (GO:0016021);; Biological Process: detection of chemical stimulus involved in senso…	K04257|1.1557e-144|umr:103678914|olfactory receptor 6C2-like; K04257 olfactory receptor (A)	--	--	Olfactory receptor-like protein OLF4 OS=Canis familiaris (Dog) PE=3 SV=1	Olfactory receptor {ECO:0000256|RuleBase:RU000688} OS=Felis catus (Cat) PE=3 SV=1	PREDICTED: olfactory receptor 6C2-like [Ursus maritimus]
gene26826	--	--	--	K04257|4.35373e-160|cfa:482721|olfactory receptor 2A2-like; K04257 olfactory receptor (A)	--	--	Olfactory receptor-like protein OLF3 OS=Canis familiaris (Dog) PE=3 SV=1	Olfactory receptor {ECO:0000256|RuleBase:RU000688} OS=Camelus ferus (Wild Bactrian camel) PE=3 SV=1	PREDICTED: olfactory receptor 2A2-like isoform 1 [Canis lupus familiaris]
gene25252	--	--	Molecular Function: G-protein coupled receptor activity (GO:0004930);; Molecular Function: olfactory receptor activity (GO:0004984);; Cellular Component: plasma membrane (GO:0005886);; Biological Process: G-protein coupled receptor signaling pathway (GO:0007186);; Cellular Component: integral component of membrane (GO:0016021);; Biological Process: detection of chemical stimulus involved in senso…	K04257|0|umr:103667376|olfactory receptor 139; K04257 olfactory receptor (A)	--	--	Olfactory receptor 3A2 GN=OR3A2 OS=Pan troglodytes (Chimpanzee) PE=3 SV=1	Olfactory receptor {ECO:0000256|RuleBase:RU000688} OS=Tupaia chinensis (Chinese tree shrew) PE=3 SV=1	PREDICTED: olfactory receptor 139 [Ursus maritimus]
gene17257	--	--	Molecular Function: G-protein coupled receptor activity (GO:0004930);; Molecular Function: olfactory receptor activity (GO:0004984);; Cellular Component: plasma membrane (GO:0005886);; Biological Process: G-protein coupled receptor signaling pathway (GO:0007186);; Cellular Component: integral component of membrane (GO:0016021);; Biological Process: detection of chemical stimulus involved in senso…	K04257|1.7912e-162|cfa:486477|COR6C13; olfactory receptor family 6 subfamily C member 13; K04257 olfactory receptor (A)	--	--	Olfactory receptor 1E1 GN=OR1E1 OS=Pan troglodytes (Chimpanzee) PE=3 SV=1	Olfactory receptor {ECO:0000256|RuleBase:RU000688} OS=Mustela putorius furo (European domestic ferret) PE=3 SV=1	PREDICTED: olfactory receptor 6C74-like [Mustela putorius furo]
gene24728	--	--	Molecular Function: G-protein coupled receptor activity (GO:0004930);; Molecular Function: olfactory receptor activity (GO:0004984);; Cellular Component: plasma membrane (GO:0005886);; Biological Process: G-protein coupled receptor signaling pathway (GO:0007186);; Cellular Component: integral component of membrane (GO:0016021);; Biological Process: detection of chemical stimulus involved in senso…	--	--	--	Olfactory receptor-like protein OLF2 OS=Canis familiaris (Dog) PE=3 SV=1	Putative uncharacterized protein {ECO:0000313|EMBL:EFB21455.1} (Fragment) OS=Ailuropoda melanoleuca (Giant panda) PE=3 SV=1	hypothetical protein PANDA_021826 [Ailuropoda melanoleuca]
gene15270	--	--	Molecular Function: G-protein coupled receptor activity (GO:0004930);; Molecular Function: olfactory receptor activity (GO:0004984);; Cellular Component: plasma membrane (GO:0005886);; Biological Process: G-protein coupled receptor signaling pathway (GO:0007186);; Cellular Component: integral component of membrane (GO:0016021);; Biological Process: detection of chemical stimulus involved in senso…	K04257|4.02238e-132|umr:103656262|olfactory receptor 8D1; K04257 olfactory receptor (A)	--	--	Olfactory receptor-like protein OLF2 OS=Canis familiaris (Dog) PE=3 SV=1	Olfactory receptor {ECO:0000256|RuleBase:RU000688} OS=Macaca fascicularis (Crab-eating macaque) PE=3 SV=1	PREDICTED: olfactory receptor 8D1-like [Ceratotherium simum simum]
gene11466	--	--	Molecular Function: G-protein coupled receptor activity (GO:0004930);; Molecular Function: olfactory receptor activity (GO:0004984);; Cellular Component: plasma membrane (GO:0005886);; Biological Process: G-protein coupled receptor signaling pathway (GO:0007186);; Cellular Component: integral component of membrane (GO:0016021);; Biological Process: detection of chemical stimulus involved in senso…	K04257|5.85875e-161|oas:101115423|olfactory receptor 10R2-like; K04257 olfactory receptor (A)	--	--	Olfactory receptor-like protein OLF1 OS=Canis familiaris (Dog) PE=3 SV=1	Olfactory receptor {ECO:0000256|RuleBase:RU000688} OS=Loxodonta africana (African elephant) PE=3 SV=1	PREDICTED: olfactory receptor 10T2-like [Elephantulus edwardii]
gene10782	--	--	Molecular Function: G-protein coupled receptor activity (GO:0004930);; Molecular Function: olfactory receptor activity (GO:0004984);; Cellular Component: plasma membrane (GO:0005886);; Biological Process: G-protein coupled receptor signaling pathway (GO:0007186);; Cellular Component: integral component of membrane (GO:0016021);; Biological Process: detection of chemical stimulus involved in senso…	K04257|0|umr:103672252|olfactory receptor 4C16-like; K04257 olfactory receptor (A)	--	--	Olfactory receptor-like protein OLF1 OS=Canis familiaris (Dog) PE=3 SV=1	Olfactory receptor {ECO:0000256|RuleBase:RU000688} OS=Felis catus (Cat) PE=3 SV=1	PREDICTED: olfactory receptor 4C16-like [Ursus maritimus]
gene11162	--	--	Molecular Function: G-protein coupled receptor activity (GO:0004930);; Molecular Function: olfactory receptor activity (GO:0004984);; Cellular Component: plasma membrane (GO:0005886);; Cellular Component: integral component of membrane (GO:0016021);;	K04257|9.42127e-154|umr:103680582|olfactory receptor 13G1; K04257 olfactory receptor (A)	--	--	Olfactory receptor 3A1 GN=OR3A1 OS=Pan troglodytes (Chimpanzee) PE=3 SV=1	Uncharacterized protein {ECO:0000313|Ensembl:ENSOARP00000018093} (Fragment) OS=Ovis aries (Sheep) PE=4 SV=1	PREDICTED: olfactory receptor 13G1 [Ursus maritimus]
gene11334	--	--	Molecular Function: G-protein coupled receptor activity (GO:0004930);; Molecular Function: olfactory receptor activity (GO:0004984);; Cellular Component: plasma membrane (GO:0005886);; Biological Process: G-protein coupled receptor signaling pathway (GO:0007186);; Cellular Component: integral component of membrane (GO:0016021);; Biological Process: detection of chemical stimulus involved in senso…	--	--	--	Olfactory receptor 3A2 GN=OR3A2 OS=Gorilla gorilla gorilla (Lowland gorilla) PE=3 SV=1	Uncharacterized protein {ECO:0000313|Ensembl:ENSSSCP00000002395} OS=Sus scrofa (Pig) PE=4 SV=2	PREDICTED: olfactory receptor 4N2-like [Ceratotherium simum simum]
gene9878	--	--	Molecular Function: G-protein coupled receptor activity (GO:0004930);; Molecular Function: olfactory receptor activity (GO:0004984);; Cellular Component: plasma membrane (GO:0005886);; Cellular Component: integral component of membrane (GO:0016021);;	K04257|3.98594e-152|myb:102250268|olfactory receptor-like protein OLF4-like; K04257 olfactory receptor (A)	--	--	Olfactory receptor-like protein OLF4 OS=Canis familiaris (Dog) PE=3 SV=1	Olfactory receptor {ECO:0000256|RuleBase:RU000688} OS=Myotis lucifugus (Little brown bat) PE=3 SV=1	PREDICTED: olfactory receptor-like protein OLF4 [Eptesicus fuscus]
gene5809	--	--	Molecular Function: G-protein coupled receptor activity (GO:0004930);; Molecular Function: olfactory receptor activity (GO:0004984);; Cellular Component: plasma membrane (GO:0005886);; Biological Process: G-protein coupled receptor signaling pathway (GO:0007186);; Cellular Component: integral component of membrane (GO:0016021);; Biological Process: detection of chemical stimulus involved in senso…	K04257|0|aml:100477364|olfactory receptor 5D13-like; K04257 olfactory receptor (A)	--	--	Olfactory receptor-like protein OLF1 OS=Canis familiaris (Dog) PE=3 SV=1	Olfactory receptor {ECO:0000256|RuleBase:RU000688} (Fragment) OS=Ailuropoda melanoleuca (Giant panda) PE=3 SV=1	PREDICTED: olfactory receptor 5D13-like [Ailuropoda melanoleuca]
gene23507	--	--	Molecular Function: G-protein coupled receptor activity (GO:0004930);; Molecular Function: olfactory receptor activity (GO:0004984);; Cellular Component: plasma membrane (GO:0005886);; Biological Process: G-protein coupled receptor signaling pathway (GO:0007186);; Cellular Component: integral component of membrane (GO:0016021);; Biological Process: detection of chemical stimulus involved in senso…	K04257|3.55551e-149|cjc:100399796|olfactory receptor 6C70; K04257 olfactory receptor (A)	--	--	Olfactory receptor 1E5 GN=OR1E5 OS=Pan troglodytes (Chimpanzee) PE=3 SV=1	Olfactory receptor {ECO:0000256|RuleBase:RU000688} (Fragment) OS=Callithrix jacchus (White-tufted-ear marmoset) PE=3 SV=1	PREDICTED: olfactory receptor 6C70-like [Leptonychotes weddellii]
gene24856	--	--	Molecular Function: G-protein coupled receptor activity (GO:0004930);; Molecular Function: olfactory receptor activity (GO:0004984);; Cellular Component: plasma membrane (GO:0005886);; Biological Process: G-protein coupled receptor signaling pathway (GO:0007186);; Cellular Component: integral component of membrane (GO:0016021);; Biological Process: detection of chemical stimulus involved in senso…	--	--	--	Olfactory receptor-like protein OLF2 OS=Canis familiaris (Dog) PE=3 SV=1	Olfactory receptor {ECO:0000256|RuleBase:RU000688} (Fragment) OS=Canis familiaris (Dog) PE=3 SV=1	PREDICTED: olfactory receptor 5L1 [Canis lupus familiaris]
gene628	--	--	Molecular Function: G-protein coupled receptor activity (GO:0004930);; Molecular Function: olfactory receptor activity (GO:0004984);; Cellular Component: plasma membrane (GO:0005886);; Cellular Component: integral component of membrane (GO:0016021);;	K04257|3.39101e-167|bta:526177|olfactory receptor 6N2; K04257 olfactory receptor (A)	--	--	Olfactory receptor-like protein DTMT OS=Canis familiaris (Dog) PE=3 SV=1	Olfactory receptor {ECO:0000256|RuleBase:RU000688} OS=Ovis aries (Sheep) PE=3 SV=1	PREDICTED: olfactory receptor 6N2-like [Bubalus bubalis]
gene15510	--	--	Molecular Function: G-protein coupled receptor activity (GO:0004930);; Molecular Function: olfactory receptor activity (GO:0004984);; Cellular Component: plasma membrane (GO:0005886);; Biological Process: G-protein coupled receptor signaling pathway (GO:0007186);; Cellular Component: integral component of membrane (GO:0016021);; Biological Process: detection of chemical stimulus involved in senso…	K04257|7.71655e-144|ngi:103750363|olfactory receptor 5V1-like; K04257 olfactory receptor (A)	--	--	Olfactory receptor 1G1 GN=OR1G1 OS=Gorilla gorilla gorilla (Lowland gorilla) PE=3 SV=1	Olfactory receptor {ECO:0000256|RuleBase:RU000688} (Fragment) OS=Loxodonta africana (African elephant) PE=3 SV=1	PREDICTED: olfactory receptor 5V1-like [Panthera tigris altaica]
gene24517	--	--	Molecular Function: G-protein coupled receptor activity (GO:0004930);; Molecular Function: olfactory receptor activity (GO:0004984);; Cellular Component: plasma membrane (GO:0005886);; Biological Process: G-protein coupled receptor signaling pathway (GO:0007186);; Cellular Component: integral component of membrane (GO:0016021);; Biological Process: detection of chemical stimulus involved in senso…	K04257|1.79772e-114|umr:103666198|olfactory receptor 4P4-like; K04257 olfactory receptor (A)	--	--	Olfactory receptor-like protein OLF4 OS=Canis familiaris (Dog) PE=3 SV=1	Olfactory receptor {ECO:0000256|RuleBase:RU000688} OS=Felis catus (Cat) PE=3 SV=1	PREDICTED: olfactory receptor 4P4-like [Ursus maritimus]
gene13708	--	--	Molecular Function: G-protein coupled receptor activity (GO:0004930);; Molecular Function: olfactory receptor activity (GO:0004984);; Cellular Component: plasma membrane (GO:0005886);; Biological Process: G-protein coupled receptor signaling pathway (GO:0007186);; Cellular Component: integral component of membrane (GO:0016021);; Biological Process: detection of chemical stimulus involved in senso…	K04257|0|phd:102335332|olfactory receptor 9K2-like; K04257 olfactory receptor (A)	--	--	Olfactory receptor-like protein OLF1 OS=Canis familiaris (Dog) PE=3 SV=1	Olfactory receptor {ECO:0000256|RuleBase:RU000688} OS=Ovis aries (Sheep) PE=3 SV=1	PREDICTED: olfactory receptor 9K2-like [Equus caballus]
[truncated: 407 more rows]

## Sheet: carbohydrate-splitting enzyme
#GeneID	COG_class	COG_class_annotation	GO_annotation	KEGG_annotation	KOG_class	KOG_class_annotation	Swissprot_annotation	TrEMBL_annotation	nr_annotation
[truncated: 20 more rows]

## Sheet: lipolytic enzyme
#GeneID	COG_class	COG_class_annotation	GO_annotation	KEGG_annotation	KOG_class	KOG_class_annotation	Swissprot_annotation	TrEMBL_annotation	nr_annotation
[truncated: 70 more rows]

## Sheet: proteolytic enzyme
#GeneID	COG_class	COG_class_annotation	GO_annotation	KEGG_annotation	KOG_class	KOG_class_annotation	Swissprot_annotation	TrEMBL_annotation	nr_annotation
[truncated: 39 more rows]

## Sheet: transporter
#GeneID	COG_class	COG_class_annotation	GO_annotation	KEGG_annotation	KOG_class	KOG_class_annotation	Swissprot_annotation	TrEMBL_annotation	nr_annotation
[truncated: 259 more rows]
