# Supplementary material for: Transcriptomic analysis identifies genes and pathways related to myrmecophagy in the Malayan pangolin (Manis javanica)
Source: PubMed Central journal article supplement (PMC5742527; doi:10.7717/peerj.4140), 2017-12-22

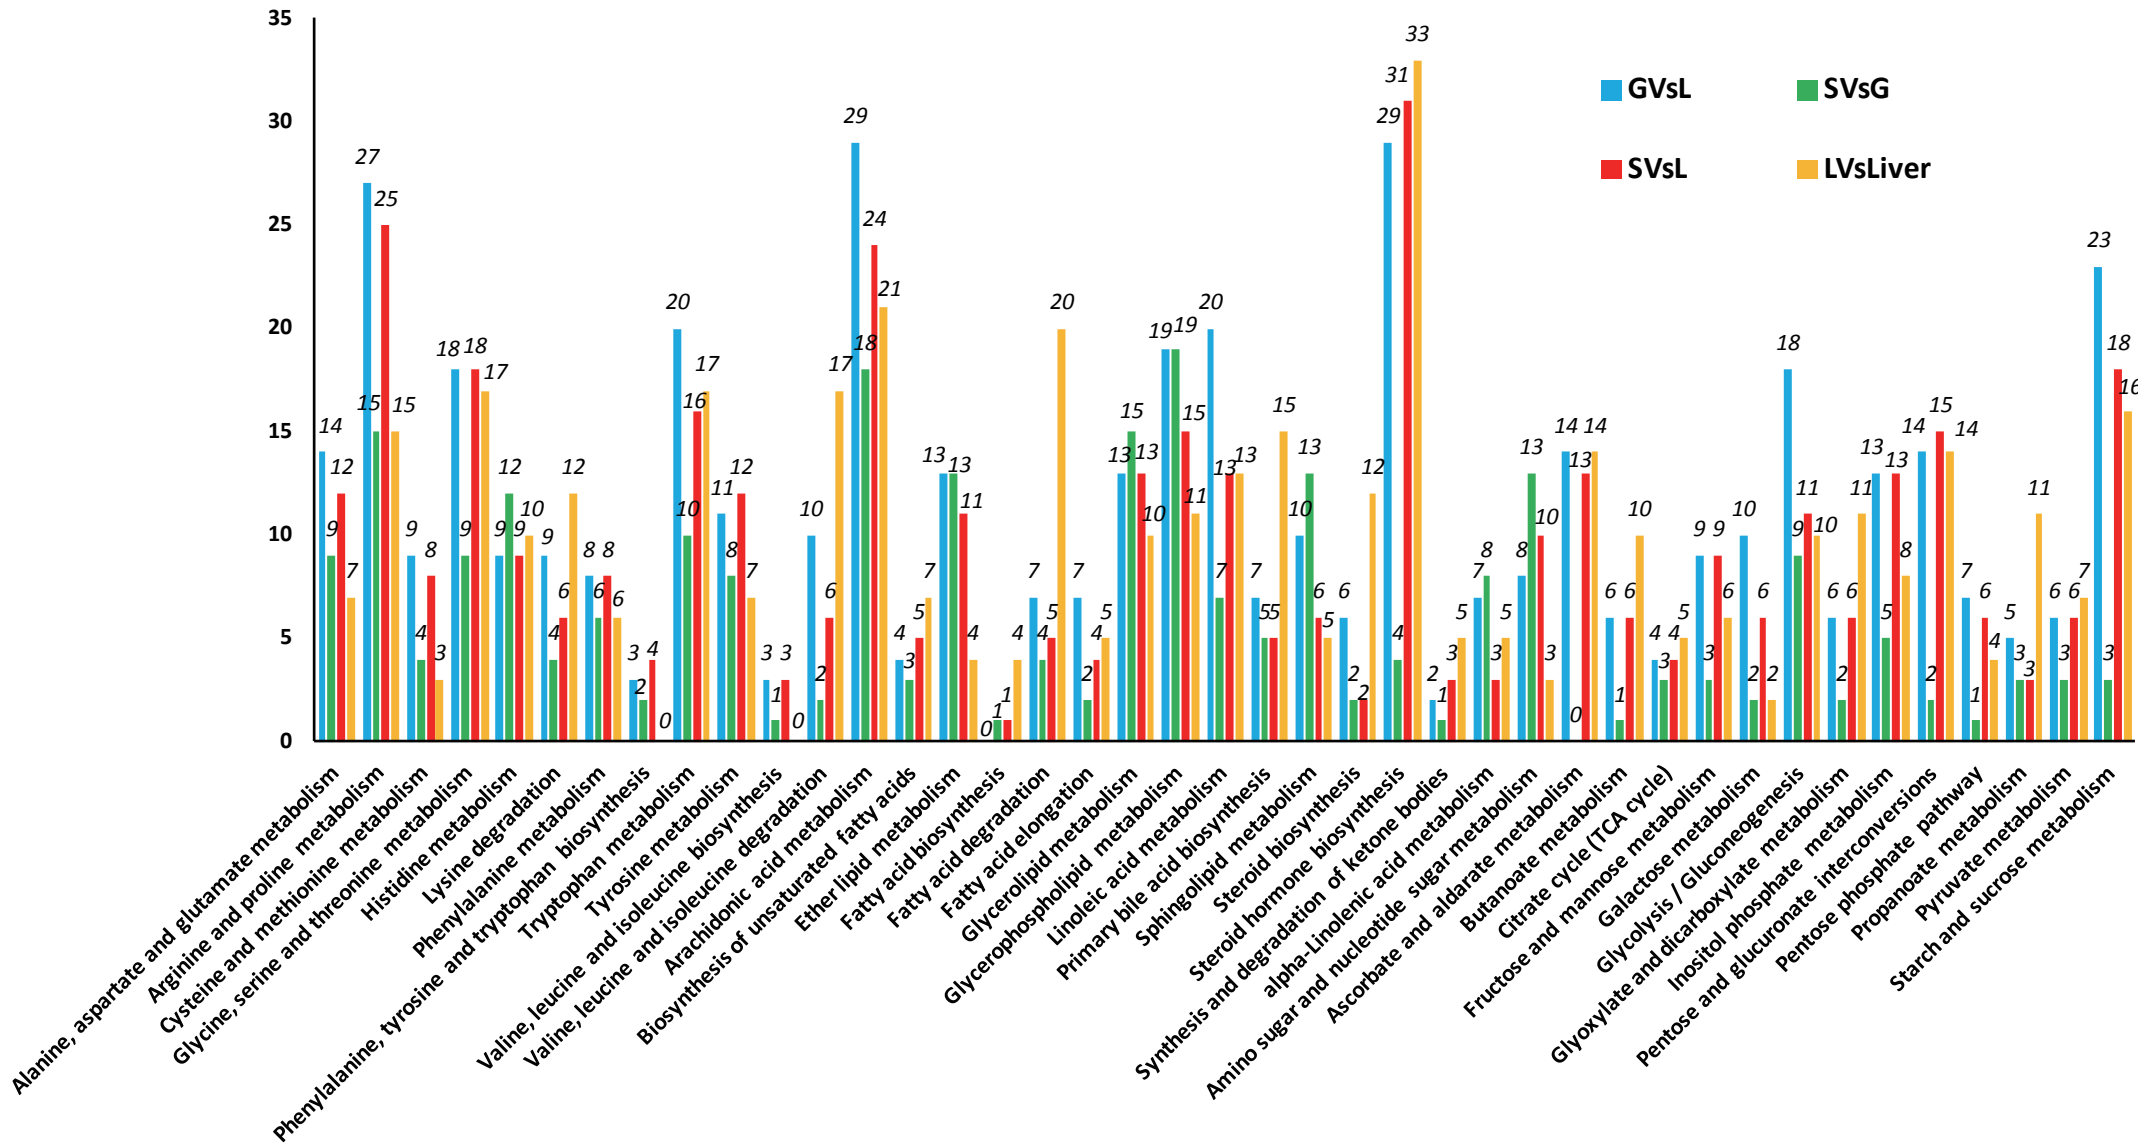

Supplement: peerj-05-4140-s015.pdf [file peerj-05-4140-s015.pdf]
